# Supplementary material for: Natural hybridization between two butterfly bushes in Tibet: dominance of F1 hybrids promotes strong reproductive isolation &nbsp;&nbsp;
Source: Research Square preprint supplement (doi:10.21203/rs.3.rs-42245/v2), 2020-10-07
Supplement: Supplementary file 1 [file edb07af78ff08b1bcf85e70b.xlsx]

## Sheet: Sheet1
Table S4 Petal reflectance spectra in B. alternifolia, B. crispa, and B. × wardii.
Taxa	B. alternifolia																														B. crispa
Wave length (nm)\Individuals	1	2	3	4	5	6	7	8	9	10	11	12	13	14	15	16	17	18	19	20	21	22	23	24	25	26	27	28	29	30	1	2	3	4	5	6	7	8	9	10	11	12	13	14	15	16	17	18	19
251.43	3.575	4.294	2.676	3.738	3.293	4.648	2.785	4.233	4.385	4.445	4.411	3.713	4.861	4.229	4.309	4.168	4.781	3.086	4.372	4.063	4.047	4.393	3.301	4.063	3.052	4.15	2.772	3.819	2.91	4.246	3.173	3.69	2.805	3.499	3.26	3.513	3.012	2.775	2.773	3.213	2.708	3.382	2.873	2.639	3.286	2.995	3.096	3.209	1.848
251.88	3.573	4.299	2.684	3.733	3.291	4.647	2.774	4.235	4.38	4.448	4.406	3.71	4.854	4.227	4.312	4.161	4.779	3.088	4.364	4.061	4.045	4.394	3.292	4.058	3.055	4.145	2.769	3.828	2.912	4.25	3.159	3.684	2.804	3.491	3.253	3.499	3.008	2.763	2.764	3.209	2.706	3.368	2.867	2.63	3.274	2.98	3.084	3.201	1.843
252.34	3.568	4.302	2.698	3.738	3.298	4.644	2.772	4.222	4.378	4.452	4.411	3.71	4.845	4.224	4.309	4.166	4.782	3.088	4.368	4.062	4.047	4.39	3.285	4.063	3.059	4.151	2.769	3.824	2.921	4.248	3.153	3.671	2.802	3.485	3.265	3.499	3.001	2.758	2.767	3.199	2.713	3.357	2.86	2.637	3.281	2.976	3.085	3.208	1.844
252.79	3.565	4.301	2.698	3.722	3.295	4.642	2.769	4.224	4.376	4.456	4.411	3.711	4.842	4.217	4.306	4.152	4.781	3.088	4.368	4.06	4.046	4.38	3.288	4.063	3.052	4.154	2.767	3.817	2.929	4.242	3.153	3.669	2.802	3.487	3.258	3.493	2.994	2.753	2.767	3.188	2.704	3.349	2.862	2.639	3.271	2.965	3.086	3.206	1.837
253.24	3.562	4.301	2.689	3.715	3.284	4.636	2.761	4.214	4.367	4.442	4.404	3.704	4.831	4.207	4.29	4.137	4.782	3.078	4.361	4.05	4.039	4.368	3.276	4.059	3.041	4.147	2.761	3.803	2.932	4.231	3.146	3.657	2.79	3.467	3.248	3.484	2.986	2.739	2.751	3.18	2.697	3.339	2.866	2.622	3.261	2.955	3.078	3.199	1.83
253.7	3.552	4.298	2.685	3.71	3.282	4.623	2.755	4.205	4.361	4.442	4.395	3.694	4.826	4.193	4.282	4.124	4.788	3.08	4.355	4.04	4.034	4.368	3.273	4.05	3.04	4.144	2.763	3.802	2.929	4.222	3.139	3.643	2.782	3.458	3.238	3.477	2.974	2.733	2.745	3.171	2.689	3.335	2.871	2.628	3.254	2.942	3.074	3.197	1.825
254.15	3.55	4.287	2.691	3.703	3.282	4.612	2.75	4.194	4.346	4.442	4.395	3.69	4.821	4.184	4.276	4.121	4.784	3.081	4.344	4.038	4.028	4.368	3.264	4.045	3.04	4.136	2.767	3.802	2.927	4.213	3.146	3.638	2.784	3.465	3.229	3.473	2.973	2.735	2.756	3.173	2.686	3.335	2.871	2.625	3.255	2.941	3.067	3.199	1.827
254.6	3.541	4.275	2.683	3.695	3.272	4.595	2.749	4.182	4.329	4.432	4.382	3.687	4.802	4.179	4.266	4.104	4.784	3.076	4.335	4.034	4.02	4.36	3.251	4.049	3.039	4.119	2.76	3.786	2.919	4.213	3.153	3.634	2.795	3.468	3.233	3.48	2.971	2.738	2.755	3.173	2.687	3.338	2.875	2.628	3.257	2.94	3.066	3.201	1.827
255.06	3.529	4.257	2.671	3.674	3.261	4.582	2.73	4.166	4.297	4.427	4.361	3.678	4.795	4.156	4.251	4.091	4.776	3.062	4.315	4.032	4.01	4.345	3.238	4.043	3.028	4.11	2.756	3.765	2.914	4.194	3.155	3.631	2.79	3.46	3.228	3.479	2.972	2.734	2.759	3.172	2.691	3.337	2.886	2.633	3.258	2.947	3.079	3.19	1.828
255.51	3.527	4.24	2.673	3.672	3.253	4.577	2.726	4.16	4.288	4.424	4.351	3.675	4.787	4.148	4.244	4.089	4.768	3.062	4.315	4.032	4.005	4.34	3.236	4.037	3.027	4.102	2.748	3.755	2.919	4.19	3.145	3.621	2.791	3.455	3.226	3.466	2.961	2.733	2.758	3.163	2.677	3.329	2.881	2.63	3.26	2.947	3.081	3.189	1.826
255.96	3.523	4.227	2.663	3.659	3.241	4.576	2.72	4.156	4.281	4.415	4.353	3.67	4.775	4.132	4.243	4.08	4.754	3.053	4.301	4.032	3.993	4.339	3.228	4.032	3.03	4.096	2.739	3.748	2.922	4.184	3.137	3.612	2.792	3.438	3.224	3.462	2.959	2.728	2.752	3.158	2.674	3.331	2.877	2.628	3.249	2.937	3.077	3.19	1.833
256.41	3.514	4.219	2.657	3.652	3.24	4.565	2.717	4.157	4.271	4.41	4.347	3.669	4.781	4.138	4.244	4.077	4.756	3.054	4.299	4.031	3.998	4.342	3.223	4.033	3.027	4.086	2.735	3.754	2.92	4.177	3.13	3.599	2.79	3.424	3.222	3.46	2.955	2.725	2.754	3.15	2.674	3.336	2.867	2.629	3.244	2.941	3.072	3.192	1.828
256.87	3.504	4.215	2.647	3.649	3.249	4.56	2.707	4.155	4.261	4.402	4.337	3.666	4.767	4.132	4.23	4.076	4.748	3.052	4.285	4.03	3.991	4.337	3.223	4.015	3.019	4.087	2.724	3.743	2.917	4.167	3.109	3.583	2.776	3.415	3.216	3.456	2.954	2.728	2.752	3.15	2.669	3.335	2.857	2.63	3.251	2.931	3.065	3.183	1.826
257.32	3.495	4.209	2.644	3.646	3.254	4.553	2.703	4.149	4.247	4.397	4.327	3.663	4.763	4.119	4.219	4.063	4.739	3.048	4.282	4.025	3.99	4.339	3.221	4.019	3.014	4.076	2.721	3.749	2.916	4.165	3.103	3.574	2.775	3.414	3.208	3.454	2.95	2.721	2.748	3.151	2.661	3.331	2.859	2.628	3.253	2.927	3.066	3.185	1.815
257.77	3.483	4.205	2.643	3.645	3.249	4.537	2.696	4.153	4.241	4.401	4.317	3.659	4.751	4.121	4.214	4.06	4.728	3.042	4.281	4.024	3.98	4.34	3.221	4.013	3.011	4.073	2.723	3.738	2.922	4.172	3.095	3.56	2.768	3.404	3.202	3.446	2.946	2.715	2.744	3.142	2.65	3.33	2.851	2.62	3.245	2.924	3.051	3.185	1.794
258.23	3.48	4.207	2.64	3.653	3.246	4.527	2.695	4.146	4.235	4.396	4.309	3.657	4.751	4.121	4.206	4.056	4.723	3.037	4.273	4.017	3.975	4.338	3.218	4.016	3.005	4.071	2.727	3.741	2.916	4.176	3.086	3.556	2.765	3.396	3.199	3.43	2.935	2.709	2.732	3.144	2.636	3.321	2.843	2.608	3.235	2.916	3.041	3.175	1.787
258.68	3.466	4.199	2.634	3.641	3.244	4.522	2.689	4.134	4.219	4.389	4.295	3.643	4.742	4.117	4.198	4.045	4.71	3.028	4.266	4.009	3.966	4.339	3.212	4	3.003	4.068	2.725	3.722	2.912	4.17	3.085	3.565	2.775	3.388	3.207	3.433	2.946	2.715	2.727	3.145	2.65	3.328	2.843	2.61	3.234	2.918	3.041	3.184	1.791
259.13	3.462	4.189	2.631	3.63	3.253	4.513	2.689	4.126	4.209	4.382	4.292	3.641	4.743	4.101	4.189	4.031	4.702	3.026	4.255	4.001	3.961	4.339	3.209	3.995	2.999	4.066	2.722	3.721	2.921	4.167	3.079	3.56	2.77	3.377	3.201	3.42	2.941	2.71	2.721	3.137	2.649	3.327	2.838	2.596	3.236	2.913	3.034	3.176	1.786
259.59	3.454	4.178	2.631	3.616	3.253	4.516	2.688	4.116	4.209	4.375	4.285	3.63	4.743	4.1	4.191	4.022	4.697	3.027	4.253	3.987	3.959	4.335	3.202	4.002	2.999	4.06	2.718	3.716	2.917	4.159	3.086	3.565	2.772	3.37	3.2	3.418	2.938	2.713	2.715	3.135	2.644	3.326	2.835	2.597	3.235	2.918	3.034	3.175	1.791
260.04	3.449	4.16	2.627	3.6	3.244	4.507	2.686	4.111	4.198	4.366	4.282	3.625	4.738	4.091	4.187	4.01	4.688	3.016	4.246	3.975	3.951	4.331	3.196	3.995	2.996	4.048	2.717	3.711	2.916	4.148	3.084	3.556	2.768	3.364	3.196	3.422	2.935	2.709	2.708	3.127	2.637	3.318	2.832	2.587	3.233	2.913	3.026	3.176	1.79
260.49	3.44	4.146	2.618	3.591	3.235	4.491	2.684	4.101	4.189	4.354	4.272	3.615	4.729	4.086	4.183	4.006	4.677	3.012	4.238	3.963	3.944	4.327	3.194	3.99	2.986	4.04	2.709	3.696	2.906	4.142	3.085	3.551	2.764	3.356	3.192	3.418	2.935	2.714	2.71	3.127	2.63	3.316	2.829	2.594	3.235	2.915	3.011	3.172	1.782
260.94	3.43	4.131	2.614	3.587	3.223	4.477	2.677	4.09	4.174	4.341	4.259	3.598	4.723	4.076	4.181	3.989	4.671	3.004	4.234	3.95	3.935	4.324	3.192	3.981	2.973	4.026	2.699	3.687	2.888	4.124	3.069	3.536	2.755	3.346	3.176	3.395	2.925	2.702	2.697	3.117	2.607	3.304	2.814	2.578	3.217	2.902	2.991	3.154	1.763
261.4	3.43	4.13	2.612	3.585	3.221	4.475	2.68	4.091	4.169	4.335	4.248	3.592	4.716	4.08	4.188	3.988	4.671	3.008	4.229	3.948	3.924	4.328	3.19	3.98	2.971	4.027	2.7	3.681	2.885	4.117	3.064	3.536	2.752	3.338	3.181	3.384	2.929	2.702	2.692	3.122	2.602	3.304	2.812	2.582	3.228	2.901	2.994	3.157	1.766
261.85	3.416	4.12	2.613	3.579	3.221	4.468	2.677	4.088	4.158	4.327	4.242	3.581	4.708	4.076	4.19	3.984	4.659	3.012	4.226	3.942	3.92	4.324	3.193	3.973	2.975	4.022	2.707	3.68	2.878	4.112	3.071	3.539	2.755	3.352	3.189	3.391	2.94	2.714	2.702	3.127	2.607	3.31	2.809	2.594	3.235	2.903	3.004	3.158	1.77
262.3	3.41	4.115	2.613	3.572	3.222	4.464	2.674	4.087	4.15	4.321	4.248	3.58	4.714	4.068	4.188	3.986	4.647	3.014	4.222	3.938	3.92	4.324	3.198	3.964	2.976	4.019	2.706	3.677	2.875	4.105	3.061	3.533	2.75	3.348	3.181	3.382	2.937	2.706	2.697	3.127	2.599	3.307	2.784	2.582	3.228	2.894	2.991	3.152	1.761
262.75	3.4	4.12	2.608	3.566	3.21	4.456	2.667	4.097	4.145	4.313	4.243	3.575	4.703	4.062	4.188	3.975	4.649	3.006	4.221	3.931	3.908	4.313	3.198	3.953	2.969	4.018	2.701	3.673	2.869	4.098	3.058	3.539	2.743	3.34	3.18	3.38	2.94	2.71	2.688	3.126	2.595	3.303	2.786	2.579	3.226	2.898	2.993	3.147	1.759
263.21	3.394	4.115	2.603	3.55	3.206	4.45	2.661	4.092	4.137	4.309	4.237	3.562	4.7	4.049	4.181	3.972	4.634	2.998	4.216	3.915	3.91	4.302	3.19	3.939	2.959	4.011	2.694	3.679	2.861	4.094	3.052	3.531	2.737	3.337	3.173	3.368	2.934	2.702	2.684	3.12	2.59	3.292	2.781	2.574	3.221	2.894	2.998	3.141	1.757
263.66	3.389	4.105	2.603	3.552	3.21	4.458	2.658	4.083	4.138	4.297	4.229	3.555	4.695	4.048	4.177	3.967	4.627	2.996	4.215	3.905	3.912	4.294	3.185	3.929	2.953	4.003	2.682	3.677	2.848	4.092	3.038	3.525	2.733	3.336	3.168	3.357	2.928	2.695	2.676	3.104	2.576	3.286	2.771	2.567	3.213	2.882	2.982	3.14	1.746
264.11	3.382	4.103	2.597	3.549	3.2	4.457	2.654	4.074	4.132	4.284	4.226	3.544	4.686	4.032	4.167	3.96	4.616	2.987	4.206	3.894	3.905	4.289	3.184	3.922	2.94	4.001	2.674	3.671	2.841	4.084	3.029	3.514	2.727	3.329	3.165	3.352	2.924	2.694	2.668	3.101	2.578	3.282	2.769	2.557	3.207	2.878	2.975	3.137	1.74
264.56	3.373	4.097	2.593	3.549	3.203	4.448	2.645	4.063	4.113	4.28	4.212	3.537	4.674	4.029	4.16	3.95	4.615	2.983	4.202	3.883	3.896	4.28	3.182	3.919	2.93	3.996	2.674	3.668	2.833	4.082	3.023	3.509	2.714	3.317	3.157	3.342	2.921	2.686	2.664	3.092	2.564	3.264	2.756	2.554	3.206	2.867	2.966	3.123	1.732
265.02	3.367	4.089	2.598	3.546	3.196	4.446	2.643	4.049	4.103	4.278	4.201	3.527	4.659	4.011	4.154	3.946	4.608	2.978	4.194	3.874	3.883	4.273	3.177	3.919	2.924	3.996	2.668	3.663	2.832	4.079	3.026	3.506	2.715	3.325	3.159	3.337	2.92	2.679	2.668	3.093	2.558	3.257	2.759	2.549	3.209	2.863	2.959	3.124	1.734
265.47	3.363	4.073	2.594	3.538	3.184	4.43	2.641	4.035	4.092	4.275	4.194	3.522	4.653	4.002	4.145	3.941	4.605	2.976	4.194	3.87	3.874	4.272	3.169	3.913	2.919	3.981	2.669	3.66	2.833	4.082	3.022	3.501	2.719	3.319	3.156	3.327	2.909	2.662	2.66	3.079	2.546	3.249	2.755	2.539	3.195	2.86	2.946	3.127	1.724
265.92	3.355	4.066	2.597	3.525	3.179	4.427	2.637	4.03	4.092	4.269	4.187	3.515	4.648	3.996	4.141	3.944	4.602	2.966	4.184	3.866	3.869	4.272	3.165	3.905	2.916	3.978	2.665	3.654	2.829	4.081	3.013	3.49	2.706	3.319	3.152	3.313	2.909	2.65	2.654	3.066	2.534	3.24	2.749	2.535	3.188	2.856	2.935	3.11	1.72
266.37	3.345	4.059	2.593	3.512	3.178	4.433	2.633	4.015	4.086	4.267	4.181	3.506	4.646	3.983	4.132	3.942	4.596	2.961	4.179	3.854	3.868	4.27	3.164	3.903	2.915	3.965	2.655	3.642	2.827	4.075	3.01	3.484	2.705	3.321	3.149	3.31	2.907	2.649	2.644	3.06	2.532	3.237	2.741	2.533	3.18	2.848	2.94	3.107	1.722
266.83	3.353	4.046	2.592	3.506	3.181	4.425	2.626	4.009	4.083	4.267	4.179	3.504	4.642	3.969	4.127	3.938	4.591	2.96	4.177	3.857	3.87	4.277	3.167	3.895	2.916	3.96	2.649	3.637	2.831	4.075	3.009	3.48	2.708	3.325	3.146	3.31	2.906	2.645	2.643	3.06	2.534	3.236	2.748	2.533	3.177	2.847	2.936	3.112	1.724
267.28	3.338	4.035	2.585	3.498	3.169	4.415	2.623	3.994	4.073	4.255	4.172	3.504	4.632	3.958	4.112	3.933	4.592	2.957	4.176	3.847	3.867	4.264	3.163	3.888	2.903	3.957	2.641	3.637	2.822	4.067	3.008	3.476	2.706	3.327	3.146	3.305	2.901	2.645	2.646	3.06	2.527	3.234	2.752	2.534	3.173	2.844	2.937	3.109	1.727
267.73	3.331	4.042	2.584	3.493	3.162	4.411	2.624	3.988	4.066	4.244	4.163	3.499	4.621	3.951	4.116	3.934	4.59	2.953	4.173	3.843	3.868	4.26	3.161	3.892	2.9	3.953	2.635	3.624	2.817	4.062	3.011	3.48	2.71	3.331	3.146	3.306	2.906	2.647	2.645	3.064	2.528	3.233	2.753	2.552	3.173	2.854	2.944	3.113	1.733
268.18	3.33	4.04	2.587	3.494	3.158	4.411	2.619	3.993	4.053	4.241	4.157	3.495	4.614	3.944	4.11	3.942	4.586	2.948	4.166	3.849	3.865	4.26	3.162	3.884	2.898	3.95	2.633	3.621	2.814	4.069	2.998	3.47	2.702	3.332	3.134	3.295	2.901	2.642	2.64	3.059	2.518	3.231	2.743	2.547	3.163	2.837	2.932	3.103	1.72
268.64	3.327	4.036	2.587	3.501	3.168	4.42	2.616	3.984	4.051	4.246	4.161	3.485	4.61	3.942	4.106	3.943	4.587	2.956	4.161	3.853	3.873	4.264	3.165	3.886	2.894	3.951	2.634	3.616	2.811	4.069	2.987	3.456	2.698	3.329	3.125	3.281	2.895	2.633	2.632	3.057	2.515	3.229	2.739	2.546	3.16	2.832	2.929	3.102	1.708
269.09	3.323	4.034	2.586	3.498	3.165	4.424	2.622	3.989	4.044	4.25	4.158	3.483	4.607	3.94	4.095	3.938	4.592	2.949	4.155	3.855	3.867	4.264	3.167	3.884	2.891	3.948	2.639	3.615	2.813	4.063	2.988	3.457	2.699	3.33	3.125	3.279	2.886	2.629	2.628	3.049	2.507	3.235	2.737	2.544	3.168	2.833	2.937	3.101	1.707
269.54	3.327	4.034	2.586	3.484	3.162	4.423	2.622	3.995	4.035	4.248	4.15	3.49	4.598	3.938	4.095	3.94	4.587	2.951	4.149	3.849	3.868	4.261	3.164	3.879	2.886	3.946	2.639	3.61	2.821	4.074	2.99	3.459	2.697	3.334	3.121	3.28	2.884	2.628	2.627	3.053	2.508	3.238	2.743	2.535	3.173	2.831	2.933	3.104	1.715
269.99	3.312	4.021	2.582	3.479	3.156	4.407	2.609	3.985	4.021	4.232	4.145	3.48	4.589	3.93	4.077	3.932	4.576	2.942	4.14	3.838	3.872	4.257	3.15	3.871	2.883	3.935	2.633	3.605	2.815	4.066	2.991	3.453	2.701	3.332	3.114	3.277	2.876	2.63	2.629	3.048	2.507	3.236	2.738	2.531	3.166	2.823	2.923	3.099	1.707
270.44	3.317	4.023	2.586	3.484	3.158	4.408	2.613	3.988	4.021	4.236	4.14	3.49	4.596	3.925	4.083	3.943	4.58	2.942	4.134	3.84	3.876	4.265	3.153	3.877	2.881	3.936	2.63	3.609	2.819	4.075	2.98	3.443	2.7	3.323	3.108	3.26	2.864	2.618	2.619	3.042	2.501	3.233	2.736	2.523	3.162	2.823	2.914	3.097	1.702
270.9	3.316	4.02	2.581	3.486	3.156	4.405	2.609	3.98	4.022	4.235	4.121	3.486	4.579	3.924	4.08	3.936	4.58	2.937	4.133	3.837	3.874	4.263	3.14	3.879	2.869	3.93	2.624	3.6	2.808	4.073	2.983	3.446	2.705	3.332	3.123	3.267	2.871	2.624	2.622	3.044	2.504	3.232	2.753	2.518	3.163	2.833	2.917	3.1	1.706
271.35	3.308	4.011	2.575	3.486	3.16	4.411	2.615	3.97	4.012	4.231	4.117	3.485	4.576	3.92	4.078	3.936	4.574	2.94	4.125	3.832	3.877	4.267	3.139	3.882	2.87	3.925	2.617	3.598	2.8	4.069	2.978	3.442	2.708	3.33	3.117	3.262	2.863	2.617	2.62	3.032	2.5	3.233	2.747	2.516	3.158	2.827	2.913	3.098	1.702
271.8	3.308	4.012	2.579	3.492	3.166	4.419	2.614	3.974	4.011	4.225	4.12	3.487	4.574	3.919	4.082	3.939	4.578	2.934	4.123	3.838	3.872	4.272	3.144	3.883	2.875	3.923	2.617	3.594	2.802	4.068	2.973	3.446	2.712	3.327	3.116	3.257	2.86	2.617	2.618	3.029	2.495	3.229	2.746	2.512	3.155	2.831	2.904	3.095	1.704
272.25	3.3	4.01	2.581	3.488	3.155	4.411	2.607	3.978	3.997	4.224	4.123	3.485	4.565	3.92	4.069	3.934	4.58	2.932	4.115	3.834	3.869	4.273	3.145	3.884	2.872	3.915	2.62	3.596	2.801	4.072	2.972	3.441	2.71	3.321	3.113	3.249	2.86	2.614	2.605	3.037	2.49	3.225	2.74	2.506	3.152	2.826	2.898	3.088	1.704
272.7	3.291	4.006	2.577	3.472	3.154	4.402	2.598	3.976	3.992	4.222	4.116	3.486	4.562	3.925	4.069	3.924	4.579	2.933	4.109	3.834	3.868	4.273	3.138	3.883	2.876	3.905	2.622	3.587	2.798	4.068	2.967	3.443	2.709	3.314	3.1	3.243	2.855	2.604	2.606	3.028	2.483	3.216	2.734	2.507	3.143	2.813	2.887	3.078	1.698
273.16	3.281	4.009	2.582	3.463	3.145	4.402	2.595	3.97	3.986	4.212	4.113	3.483	4.555	3.928	4.066	3.92	4.57	2.935	4.104	3.843	3.878	4.268	3.138	3.881	2.874	3.903	2.621	3.591	2.797	4.074	2.963	3.434	2.713	3.329	3.103	3.246	2.856	2.609	2.599	3.031	2.484	3.226	2.74	2.51	3.141	2.814	2.89	3.083	1.696
273.61	3.279	4.005	2.576	3.455	3.143	4.398	2.588	3.969	3.977	4.204	4.107	3.479	4.548	3.923	4.061	3.91	4.561	2.932	4.099	3.832	3.878	4.267	3.136	3.868	2.87	3.894	2.625	3.582	2.791	4.076	2.951	3.425	2.705	3.317	3.093	3.233	2.845	2.603	2.586	3.03	2.469	3.22	2.738	2.505	3.134	2.808	2.878	3.073	1.69
274.06	3.268	4.004	2.575	3.448	3.138	4.402	2.586	3.97	3.975	4.199	4.105	3.477	4.539	3.924	4.06	3.907	4.557	2.933	4.094	3.822	3.873	4.258	3.135	3.872	2.871	3.895	2.618	3.579	2.787	4.064	2.961	3.419	2.704	3.33	3.097	3.235	2.848	2.607	2.583	3.037	2.466	3.22	2.743	2.515	3.139	2.809	2.877	3.072	1.693
274.51	3.265	4.004	2.574	3.443	3.133	4.399	2.584	3.968	3.959	4.194	4.103	3.472	4.526	3.924	4.052	3.902	4.559	2.939	4.092	3.814	3.875	4.253	3.13	3.863	2.868	3.887	2.612	3.581	2.78	4.058	2.966	3.422	2.715	3.329	3.097	3.244	2.843	2.611	2.585	3.043	2.46	3.219	2.738	2.509	3.135	2.805	2.879	3.078	1.696
274.96	3.271	4.005	2.579	3.436	3.13	4.403	2.584	3.967	3.958	4.181	4.103	3.475	4.526	3.927	4.056	3.899	4.569	2.941	4.089	3.814	3.876	4.25	3.13	3.87	2.859	3.892	2.614	3.589	2.78	4.053	2.961	3.424	2.711	3.329	3.095	3.233	2.835	2.606	2.584	3.031	2.451	3.211	2.738	2.503	3.137	2.806	2.87	3.063	1.693
275.41	3.262	4.002	2.581	3.427	3.126	4.408	2.583	3.965	3.951	4.172	4.092	3.473	4.512	3.93	4.055	3.901	4.571	2.94	4.083	3.811	3.869	4.238	3.127	3.878	2.857	3.884	2.616	3.593	2.774	4.047	2.952	3.417	2.705	3.328	3.094	3.228	2.837	2.611	2.578	3.022	2.446	3.215	2.733	2.5	3.143	2.802	2.866	3.055	1.692
275.87	3.267	3.996	2.58	3.426	3.13	4.408	2.58	3.97	3.94	4.169	4.087	3.47	4.51	3.926	4.06	3.903	4.557	2.933	4.071	3.805	3.864	4.244	3.126	3.87	2.86	3.874	2.612	3.594	2.773	4.039	2.947	3.415	2.702	3.321	3.086	3.226	2.831	2.607	2.568	3.023	2.437	3.2	2.727	2.496	3.148	2.795	2.856	3.051	1.687
276.32	3.266	3.988	2.576	3.425	3.131	4.418	2.574	3.97	3.942	4.168	4.094	3.469	4.512	3.931	4.055	3.904	4.561	2.939	4.076	3.811	3.868	4.253	3.129	3.866	2.863	3.878	2.617	3.598	2.777	4.038	2.946	3.416	2.698	3.323	3.092	3.233	2.83	2.606	2.563	3.023	2.433	3.208	2.73	2.489	3.146	2.793	2.854	3.064	1.691
276.77	3.258	3.98	2.566	3.42	3.128	4.403	2.569	3.961	3.93	4.161	4.095	3.466	4.502	3.926	4.053	3.9	4.548	2.939	4.069	3.806	3.873	4.246	3.132	3.865	2.856	3.865	2.612	3.596	2.775	4.025	2.942	3.417	2.7	3.32	3.092	3.228	2.829	2.61	2.557	3.017	2.44	3.207	2.737	2.489	3.153	2.794	2.854	3.063	1.695
277.22	3.256	3.983	2.561	3.41	3.112	4.395	2.565	3.955	3.926	4.15	4.082	3.464	4.5	3.918	4.045	3.889	4.545	2.929	4.062	3.797	3.873	4.241	3.127	3.863	2.853	3.862	2.599	3.588	2.771	4.021	2.946	3.427	2.701	3.322	3.099	3.219	2.835	2.609	2.559	3.01	2.434	3.207	2.736	2.484	3.149	2.795	2.852	3.061	1.701
277.67	3.255	3.979	2.559	3.405	3.111	4.389	2.562	3.941	3.923	4.138	4.082	3.458	4.493	3.911	4.043	3.889	4.544	2.931	4.058	3.798	3.878	4.236	3.126	3.863	2.861	3.856	2.591	3.589	2.764	4.02	2.941	3.423	2.689	3.321	3.098	3.218	2.836	2.602	2.558	3.009	2.434	3.201	2.736	2.472	3.143	2.785	2.844	3.056	1.699
278.12	3.245	3.97	2.551	3.398	3.11	4.381	2.561	3.926	3.916	4.138	4.084	3.448	4.498	3.906	4.035	3.889	4.542	2.925	4.053	3.792	3.879	4.237	3.127	3.864	2.859	3.851	2.59	3.588	2.755	4.016	2.939	3.424	2.687	3.318	3.108	3.214	2.835	2.605	2.563	3.005	2.429	3.192	2.735	2.479	3.143	2.781	2.849	3.06	1.692
278.58	3.248	3.976	2.553	3.405	3.118	4.391	2.566	3.929	3.926	4.145	4.093	3.461	4.499	3.911	4.045	3.892	4.552	2.933	4.061	3.803	3.874	4.234	3.134	3.872	2.858	3.86	2.591	3.595	2.755	4.031	2.926	3.422	2.678	3.321	3.109	3.217	2.831	2.594	2.554	3.006	2.429	3.182	2.731	2.472	3.141	2.785	2.844	3.059	1.689
279.03	3.242	3.976	2.555	3.402	3.122	4.393	2.561	3.927	3.921	4.145	4.098	3.454	4.485	3.913	4.037	3.884	4.55	2.928	4.061	3.801	3.87	4.232	3.131	3.866	2.856	3.862	2.591	3.588	2.756	4.026	2.918	3.42	2.67	3.321	3.106	3.221	2.827	2.591	2.55	3.002	2.418	3.178	2.731	2.472	3.134	2.779	2.83	3.061	1.691
279.48	3.24	3.972	2.551	3.391	3.117	4.394	2.559	3.918	3.907	4.136	4.104	3.452	4.48	3.913	4.029	3.883	4.548	2.919	4.05	3.797	3.876	4.233	3.134	3.862	2.852	3.858	2.588	3.582	2.756	4.02	2.913	3.415	2.668	3.314	3.09	3.209	2.829	2.587	2.545	3	2.414	3.182	2.728	2.474	3.135	2.769	2.825	3.054	1.698
279.93	3.244	3.975	2.56	3.384	3.118	4.397	2.557	3.916	3.911	4.142	4.094	3.451	4.478	3.911	4.029	3.883	4.546	2.918	4.049	3.793	3.884	4.235	3.133	3.863	2.848	3.861	2.587	3.583	2.76	4.02	2.908	3.413	2.661	3.322	3.086	3.205	2.827	2.576	2.54	2.999	2.416	3.167	2.723	2.468	3.138	2.761	2.818	3.041	1.696
280.38	3.237	3.965	2.551	3.379	3.112	4.389	2.549	3.913	3.903	4.136	4.087	3.449	4.467	3.911	4.022	3.884	4.546	2.923	4.045	3.79	3.882	4.226	3.125	3.866	2.834	3.865	2.583	3.581	2.757	4.017	2.889	3.387	2.638	3.299	3.075	3.192	2.811	2.567	2.522	2.984	2.401	3.156	2.702	2.446	3.121	2.739	2.803	3.029	1.677
280.83	3.242	3.971	2.551	3.381	3.114	4.391	2.553	3.91	3.909	4.137	4.091	3.447	4.458	3.911	4.04	3.884	4.55	2.928	4.051	3.791	3.888	4.236	3.124	3.873	2.84	3.871	2.582	3.572	2.76	4.011	2.901	3.389	2.643	3.302	3.076	3.196	2.818	2.573	2.532	2.988	2.413	3.165	2.717	2.451	3.136	2.744	2.805	3.037	1.685
281.28	3.249	3.969	2.556	3.383	3.121	4.394	2.557	3.904	3.907	4.141	4.099	3.447	4.456	3.913	4.047	3.887	4.547	2.928	4.052	3.794	3.899	4.248	3.133	3.882	2.837	3.877	2.59	3.58	2.76	4.021	2.899	3.387	2.638	3.306	3.078	3.196	2.819	2.572	2.529	2.995	2.403	3.166	2.715	2.443	3.141	2.743	2.808	3.044	1.684
281.74	3.251	3.968	2.545	3.379	3.12	4.391	2.561	3.906	3.904	4.135	4.102	3.45	4.467	3.907	4.043	3.891	4.55	2.929	4.051	3.789	3.893	4.255	3.131	3.877	2.83	3.876	2.588	3.577	2.752	4.013	2.907	3.394	2.639	3.306	3.076	3.193	2.82	2.576	2.527	3.001	2.407	3.17	2.712	2.442	3.147	2.751	2.81	3.047	1.693
282.19	3.248	3.976	2.542	3.379	3.121	4.396	2.571	3.908	3.904	4.142	4.106	3.458	4.475	3.905	4.043	3.895	4.563	2.929	4.047	3.794	3.898	4.256	3.136	3.885	2.832	3.88	2.59	3.573	2.752	4.009	2.913	3.4	2.64	3.31	3.081	3.199	2.832	2.582	2.53	3.007	2.405	3.176	2.714	2.453	3.15	2.754	2.818	3.05	1.701
282.64	3.249	3.982	2.54	3.376	3.121	4.402	2.572	3.904	3.906	4.139	4.11	3.455	4.477	3.909	4.047	3.893	4.562	2.931	4.039	3.793	3.906	4.267	3.138	3.894	2.833	3.878	2.594	3.572	2.754	4.019	2.914	3.411	2.636	3.308	3.081	3.196	2.833	2.587	2.537	3.013	2.409	3.176	2.717	2.444	3.153	2.757	2.824	3.054	1.701
283.09	3.245	3.979	2.542	3.378	3.122	4.407	2.572	3.906	3.908	4.14	4.113	3.459	4.485	3.91	4.051	3.896	4.567	2.938	4.038	3.798	3.914	4.274	3.143	3.909	2.829	3.887	2.601	3.567	2.756	4.026	2.911	3.408	2.633	3.303	3.082	3.186	2.835	2.588	2.532	3.008	2.421	3.179	2.721	2.445	3.164	2.759	2.822	3.059	1.707
283.54	3.242	3.985	2.543	3.383	3.133	4.4	2.576	3.905	3.912	4.148	4.111	3.461	4.485	3.905	4.046	3.897	4.568	2.946	4.041	3.801	3.922	4.275	3.146	3.91	2.842	3.889	2.603	3.57	2.755	4.03	2.918	3.411	2.64	3.302	3.083	3.193	2.84	2.595	2.535	3.016	2.434	3.184	2.728	2.452	3.17	2.764	2.834	3.077	1.715
283.99	3.243	3.993	2.546	3.393	3.134	4.404	2.582	3.913	3.916	4.155	4.114	3.464	4.495	3.913	4.052	3.9	4.567	2.954	4.044	3.799	3.939	4.285	3.158	3.904	2.844	3.902	2.612	3.57	2.763	4.038	2.924	3.413	2.642	3.304	3.081	3.197	2.844	2.591	2.54	3.023	2.436	3.183	2.729	2.456	3.169	2.759	2.838	3.079	1.713
284.44	3.239	3.997	2.544	3.392	3.137	4.411	2.591	3.917	3.916	4.158	4.116	3.471	4.496	3.92	4.06	3.901	4.579	2.963	4.044	3.805	3.947	4.293	3.163	3.917	2.838	3.904	2.619	3.572	2.769	4.05	2.932	3.417	2.647	3.314	3.082	3.203	2.846	2.591	2.545	3.025	2.439	3.189	2.733	2.461	3.172	2.768	2.844	3.082	1.722
284.89	3.237	4.005	2.546	3.399	3.134	4.403	2.597	3.917	3.912	4.164	4.112	3.476	4.494	3.919	4.058	3.903	4.575	2.96	4.037	3.804	3.948	4.287	3.167	3.925	2.835	3.896	2.617	3.573	2.763	4.052	2.929	3.413	2.649	3.309	3.074	3.199	2.841	2.592	2.552	3.02	2.438	3.177	2.729	2.458	3.168	2.756	2.84	3.068	1.715
285.34	3.236	4.003	2.544	3.394	3.129	4.414	2.597	3.909	3.919	4.158	4.105	3.478	4.494	3.926	4.056	3.903	4.582	2.96	4.04	3.805	3.951	4.293	3.165	3.924	2.837	3.896	2.62	3.575	2.766	4.059	2.934	3.411	2.65	3.313	3.078	3.206	2.843	2.597	2.554	3.018	2.433	3.178	2.735	2.462	3.168	2.766	2.845	3.071	1.721
285.8	3.236	4.004	2.545	3.393	3.125	4.412	2.596	3.911	3.916	4.15	4.105	3.481	4.493	3.932	4.056	3.912	4.58	2.968	4.04	3.801	3.953	4.289	3.159	3.918	2.835	3.901	2.62	3.585	2.761	4.057	2.933	3.412	2.648	3.314	3.076	3.209	2.846	2.598	2.555	3.026	2.435	3.178	2.74	2.463	3.163	2.769	2.846	3.074	1.721
286.25	3.231	4.008	2.546	3.394	3.12	4.417	2.593	3.913	3.904	4.148	4.104	3.484	4.492	3.928	4.057	3.91	4.579	2.97	4.042	3.792	3.951	4.298	3.158	3.916	2.83	3.905	2.625	3.59	2.76	4.058	2.928	3.411	2.653	3.307	3.075	3.205	2.842	2.595	2.551	3.026	2.433	3.176	2.735	2.462	3.162	2.769	2.846	3.073	1.715
286.7	3.232	4.009	2.549	3.402	3.12	4.425	2.591	3.917	3.903	4.148	4.108	3.491	4.492	3.925	4.057	3.911	4.585	2.978	4.036	3.794	3.956	4.297	3.159	3.92	2.839	3.914	2.629	3.594	2.77	4.053	2.931	3.413	2.651	3.307	3.07	3.21	2.853	2.6	2.551	3.023	2.431	3.183	2.735	2.463	3.16	2.775	2.838	3.069	1.719
287.15	3.235	4.016	2.554	3.402	3.114	4.424	2.592	3.915	3.896	4.15	4.103	3.494	4.492	3.923	4.058	3.919	4.587	2.98	4.033	3.792	3.967	4.312	3.163	3.925	2.838	3.92	2.636	3.586	2.773	4.051	2.939	3.416	2.648	3.303	3.069	3.212	2.858	2.599	2.552	3.02	2.432	3.182	2.741	2.463	3.163	2.773	2.837	3.072	1.722
287.6	3.238	4.02	2.559	3.4	3.113	4.43	2.601	3.921	3.902	4.146	4.108	3.498	4.496	3.932	4.066	3.924	4.602	2.987	4.035	3.799	3.978	4.324	3.165	3.945	2.845	3.922	2.645	3.598	2.774	4.054	2.946	3.412	2.651	3.294	3.07	3.214	2.858	2.604	2.555	3.02	2.431	3.179	2.736	2.461	3.164	2.771	2.839	3.072	1.721
288.05	3.234	4.02	2.563	3.408	3.116	4.428	2.603	3.922	3.908	4.151	4.11	3.498	4.505	3.938	4.071	3.931	4.606	3	4.042	3.798	3.981	4.327	3.17	3.949	2.856	3.929	2.655	3.601	2.778	4.06	2.953	3.417	2.647	3.297	3.079	3.22	2.855	2.6	2.551	3.022	2.43	3.177	2.734	2.462	3.166	2.776	2.845	3.082	1.715
288.5	3.236	4.018	2.561	3.412	3.119	4.425	2.601	3.919	3.909	4.149	4.116	3.499	4.508	3.942	4.073	3.928	4.615	3.003	4.039	3.802	3.985	4.329	3.174	3.95	2.854	3.931	2.659	3.596	2.779	4.058	2.951	3.415	2.656	3.294	3.086	3.225	2.857	2.607	2.551	3.022	2.428	3.185	2.742	2.465	3.168	2.776	2.848	3.097	1.724
288.95	3.242	4.028	2.572	3.413	3.121	4.43	2.61	3.916	3.918	4.157	4.12	3.512	4.512	3.95	4.077	3.924	4.62	3.004	4.039	3.808	3.997	4.342	3.188	3.951	2.869	3.936	2.664	3.6	2.783	4.057	2.963	3.43	2.666	3.308	3.087	3.237	2.868	2.605	2.562	3.033	2.438	3.189	2.755	2.478	3.177	2.788	2.854	3.109	1.742
289.4	3.245	4.034	2.575	3.412	3.128	4.435	2.615	3.916	3.925	4.165	4.118	3.524	4.524	3.96	4.072	3.934	4.625	3.01	4.039	3.808	4.004	4.345	3.192	3.953	2.87	3.939	2.673	3.608	2.79	4.067	2.961	3.433	2.667	3.311	3.09	3.239	2.864	2.602	2.57	3.033	2.428	3.186	2.749	2.476	3.171	2.787	2.854	3.106	1.742
289.85	3.235	4.033	2.572	3.407	3.125	4.437	2.617	3.914	3.929	4.162	4.113	3.523	4.521	3.96	4.07	3.934	4.633	3.017	4.038	3.8	3.999	4.333	3.186	3.949	2.868	3.944	2.667	3.608	2.793	4.061	2.967	3.431	2.676	3.307	3.098	3.244	2.869	2.606	2.572	3.036	2.438	3.186	2.752	2.476	3.176	2.789	2.852	3.102	1.747
290.3	3.239	4.023	2.577	3.401	3.12	4.442	2.615	3.905	3.933	4.167	4.107	3.521	4.506	3.959	4.069	3.932	4.638	3.017	4.033	3.798	4.002	4.332	3.181	3.959	2.866	3.94	2.672	3.604	2.8	4.061	2.96	3.428	2.672	3.307	3.097	3.242	2.865	2.597	2.569	3.026	2.434	3.175	2.751	2.467	3.172	2.78	2.84	3.095	1.741
290.75	3.242	4.019	2.581	3.405	3.124	4.436	2.609	3.902	3.932	4.167	4.103	3.523	4.503	3.964	4.069	3.938	4.634	3.021	4.041	3.797	4.002	4.333	3.178	3.96	2.863	3.941	2.672	3.607	2.801	4.06	2.959	3.423	2.675	3.304	3.095	3.24	2.858	2.595	2.567	3.017	2.433	3.168	2.75	2.455	3.167	2.78	2.84	3.096	1.743
291.2	3.238	4.015	2.581	3.408	3.123	4.434	2.606	3.891	3.924	4.159	4.102	3.522	4.493	3.961	4.073	3.936	4.639	3.02	4.039	3.798	4.006	4.331	3.181	3.956	2.858	3.937	2.674	3.602	2.794	4.059	2.959	3.421	2.678	3.299	3.094	3.249	2.857	2.592	2.563	3.012	2.431	3.163	2.75	2.455	3.17	2.776	2.845	3.1	1.746
291.66	3.243	4.023	2.577	3.409	3.125	4.44	2.611	3.882	3.924	4.152	4.099	3.526	4.487	3.959	4.075	3.94	4.637	3.016	4.035	3.79	4.005	4.33	3.182	3.948	2.862	3.935	2.675	3.608	2.794	4.059	2.953	3.419	2.676	3.293	3.085	3.254	2.855	2.591	2.567	3.015	2.423	3.16	2.745	2.454	3.165	2.772	2.849	3.099	1.741
292.11	3.242	4.022	2.577	3.403	3.116	4.441	2.61	3.881	3.921	4.154	4.102	3.525	4.484	3.959	4.085	3.94	4.637	3.011	4.035	3.791	4	4.329	3.187	3.956	2.857	3.933	2.675	3.605	2.796	4.064	2.953	3.418	2.668	3.297	3.086	3.253	2.855	2.584	2.568	3.017	2.414	3.155	2.743	2.448	3.162	2.764	2.841	3.095	1.747
292.56	3.237	4.016	2.578	3.395	3.114	4.436	2.611	3.872	3.913	4.147	4.1	3.523	4.474	3.951	4.081	3.942	4.639	3.006	4.03	3.788	4.001	4.33	3.182	3.968	2.864	3.93	2.677	3.6	2.796	4.058	2.949	3.419	2.667	3.297	3.086	3.254	2.841	2.579	2.56	3.014	2.409	3.142	2.739	2.445	3.164	2.771	2.835	3.097	1.742
293.01	3.236	4.021	2.59	3.399	3.115	4.437	2.605	3.869	3.915	4.152	4.103	3.525	4.473	3.951	4.08	3.947	4.646	3.018	4.033	3.783	4.002	4.33	3.184	3.967	2.873	3.934	2.677	3.602	2.794	4.058	2.944	3.414	2.663	3.287	3.088	3.249	2.844	2.581	2.554	3.01	2.404	3.142	2.733	2.439	3.171	2.769	2.827	3.095	1.741
293.46	3.234	4.014	2.595	3.396	3.122	4.441	2.6	3.864	3.917	4.149	4.101	3.526	4.467	3.954	4.076	3.949	4.653	3.021	4.03	3.778	4.007	4.327	3.184	3.963	2.87	3.932	2.68	3.601	2.791	4.061	2.949	3.418	2.659	3.294	3.097	3.248	2.846	2.578	2.549	3.013	2.399	3.146	2.734	2.434	3.18	2.776	2.824	3.104	1.746
293.91	3.232	4.015	2.601	3.399	3.12	4.439	2.601	3.865	3.914	4.154	4.095	3.528	4.464	3.947	4.078	3.946	4.653	3.019	4.031	3.771	4.002	4.325	3.183	3.971	2.866	3.942	2.684	3.602	2.788	4.057	2.952	3.42	2.659	3.286	3.091	3.243	2.851	2.568	2.549	3.015	2.396	3.141	2.729	2.431	3.178	2.763	2.817	3.104	1.748
294.36	3.232	4.013	2.606	3.409	3.127	4.442	2.606	3.864	3.916	4.165	4.101	3.532	4.459	3.95	4.085	3.945	4.66	3.023	4.037	3.773	4.009	4.335	3.192	3.979	2.867	3.938	2.689	3.602	2.796	4.068	2.954	3.415	2.658	3.285	3.094	3.255	2.852	2.579	2.549	3.015	2.396	3.143	2.725	2.437	3.188	2.767	2.818	3.112	1.754
294.81	3.233	4.009	2.602	3.41	3.134	4.444	2.603	3.861	3.924	4.171	4.107	3.534	4.459	3.954	4.078	3.953	4.661	3.025	4.033	3.775	4.013	4.332	3.193	3.983	2.864	3.932	2.687	3.593	2.799	4.063	2.957	3.405	2.658	3.288	3.093	3.259	2.853	2.585	2.547	3.016	2.393	3.139	2.724	2.44	3.185	2.769	2.814	3.119	1.768
295.26	3.229	4.008	2.603	3.398	3.131	4.441	2.606	3.858	3.923	4.168	4.104	3.533	4.458	3.966	4.076	3.956	4.658	3.026	4.032	3.778	4.015	4.328	3.19	3.978	2.858	3.926	2.687	3.594	2.794	4.07	2.957	3.405	2.66	3.287	3.095	3.267	2.849	2.58	2.545	3.027	2.396	3.142	2.727	2.442	3.192	2.771	2.821	3.123	1.78
295.71	3.228	4.008	2.609	3.393	3.131	4.439	2.608	3.852	3.923	4.166	4.112	3.53	4.463	3.962	4.074	3.958	4.663	3.03	4.029	3.78	4.014	4.323	3.192	3.976	2.864	3.917	2.693	3.599	2.795	4.068	2.947	3.397	2.658	3.278	3.095	3.263	2.841	2.58	2.538	3.021	2.388	3.137	2.715	2.439	3.189	2.769	2.814	3.117	1.783
296.16	3.225	4.003	2.598	3.39	3.131	4.426	2.6	3.84	3.915	4.162	4.102	3.53	4.457	3.956	4.07	3.953	4.652	3.03	4.026	3.772	4.013	4.314	3.192	3.967	2.855	3.912	2.687	3.592	2.794	4.069	2.952	3.41	2.662	3.288	3.1	3.267	2.848	2.582	2.536	3.029	2.393	3.137	2.719	2.443	3.193	2.774	2.821	3.122	1.793
296.61	3.226	4.007	2.601	3.385	3.129	4.431	2.601	3.843	3.914	4.163	4.102	3.538	4.45	3.954	4.066	3.953	4.654	3.031	4.024	3.775	4.014	4.312	3.196	3.972	2.848	3.915	2.692	3.599	2.797	4.071	2.957	3.407	2.668	3.292	3.098	3.274	2.85	2.593	2.545	3.031	2.403	3.135	2.724	2.444	3.197	2.781	2.82	3.12	1.802
297.06	3.223	4.007	2.6	3.385	3.125	4.428	2.6	3.836	3.903	4.164	4.095	3.537	4.441	3.953	4.064	3.954	4.654	3.026	4.021	3.771	4.003	4.315	3.191	3.969	2.848	3.912	2.694	3.602	2.795	4.081	2.965	3.405	2.667	3.291	3.093	3.275	2.857	2.595	2.55	3.044	2.402	3.135	2.723	2.443	3.196	2.79	2.818	3.115	1.803
297.51	3.215	3.994	2.592	3.386	3.121	4.418	2.593	3.832	3.887	4.152	4.089	3.525	4.44	3.935	4.061	3.955	4.655	3.027	4.014	3.76	3.989	4.306	3.187	3.97	2.836	3.897	2.696	3.594	2.792	4.086	2.966	3.407	2.663	3.287	3.096	3.276	2.852	2.596	2.549	3.038	2.397	3.136	2.726	2.436	3.197	2.784	2.82	3.109	1.81
297.96	3.212	3.985	2.587	3.386	3.114	4.412	2.589	3.826	3.879	4.144	4.09	3.517	4.43	3.932	4.057	3.945	4.648	3.022	4.007	3.754	3.979	4.298	3.185	3.967	2.834	3.893	2.697	3.587	2.782	4.082	2.957	3.391	2.654	3.28	3.089	3.27	2.844	2.591	2.537	3.032	2.391	3.126	2.712	2.431	3.183	2.784	2.811	3.105	1.811
298.41	3.216	3.984	2.597	3.396	3.113	4.412	2.593	3.831	3.872	4.14	4.087	3.517	4.434	3.934	4.055	3.946	4.646	3.025	4.01	3.753	3.977	4.308	3.192	3.975	2.839	3.893	2.698	3.584	2.777	4.087	2.957	3.395	2.646	3.286	3.088	3.267	2.842	2.591	2.532	3.028	2.387	3.12	2.713	2.434	3.181	2.788	2.813	3.107	1.816
298.86	3.207	3.985	2.604	3.403	3.117	4.404	2.589	3.837	3.868	4.138	4.09	3.515	4.435	3.937	4.052	3.949	4.638	3.025	4.015	3.744	3.975	4.307	3.195	3.967	2.843	3.888	2.7	3.577	2.767	4.087	2.959	3.394	2.643	3.282	3.083	3.268	2.844	2.591	2.536	3.037	2.38	3.115	2.711	2.436	3.177	2.792	2.812	3.112	1.819
299.31	3.197	3.974	2.597	3.394	3.108	4.398	2.585	3.832	3.863	4.127	4.082	3.507	4.421	3.932	4.046	3.935	4.635	3.017	4.001	3.738	3.97	4.302	3.198	3.962	2.843	3.88	2.692	3.571	2.761	4.091	2.957	3.398	2.638	3.284	3.081	3.274	2.847	2.588	2.543	3.039	2.388	3.115	2.708	2.435	3.185	2.793	2.805	3.104	1.819
299.76	3.197	3.968	2.6	3.398	3.109	4.392	2.588	3.834	3.862	4.122	4.075	3.513	4.417	3.933	4.041	3.936	4.627	3.012	4	3.731	3.964	4.294	3.197	3.961	2.839	3.877	2.689	3.568	2.759	4.089	2.948	3.399	2.639	3.276	3.072	3.265	2.842	2.582	2.538	3.031	2.386	3.118	2.707	2.433	3.178	2.793	2.796	3.101	1.829
300.21	3.199	3.957	2.598	3.399	3.102	4.377	2.586	3.841	3.864	4.125	4.073	3.509	4.417	3.936	4.036	3.93	4.628	3.014	3.999	3.735	3.955	4.293	3.194	3.967	2.842	3.875	2.692	3.56	2.762	4.086	2.962	3.401	2.638	3.283	3.083	3.272	2.852	2.593	2.546	3.035	2.392	3.125	2.718	2.446	3.189	2.81	2.796	3.116	1.853
300.66	3.2	3.95	2.595	3.402	3.098	4.377	2.586	3.839	3.862	4.114	4.073	3.516	4.415	3.943	4.023	3.923	4.62	3.019	3.987	3.731	3.959	4.293	3.184	3.961	2.837	3.875	2.695	3.556	2.763	4.08	2.964	3.395	2.635	3.269	3.077	3.273	2.846	2.596	2.542	3.031	2.388	3.122	2.713	2.449	3.183	2.814	2.792	3.11	1.852
301.11	3.194	3.944	2.589	3.402	3.098	4.377	2.58	3.834	3.858	4.112	4.077	3.523	4.411	3.943	4.023	3.913	4.614	3.019	3.989	3.731	3.942	4.285	3.182	3.952	2.83	3.874	2.694	3.553	2.756	4.082	2.964	3.388	2.634	3.258	3.073	3.279	2.853	2.593	2.544	3.032	2.382	3.123	2.711	2.452	3.175	2.811	2.787	3.106	1.864
301.56	3.195	3.937	2.584	3.402	3.098	4.375	2.584	3.832	3.867	4.11	4.071	3.521	4.412	3.941	4.017	3.905	4.607	3.009	3.99	3.728	3.937	4.282	3.184	3.953	2.833	3.872	2.699	3.547	2.755	4.083	2.965	3.371	2.626	3.258	3.069	3.278	2.845	2.585	2.539	3.025	2.382	3.113	2.71	2.443	3.159	2.802	2.783	3.107	1.867
302.01	3.197	3.931	2.578	3.388	3.084	4.37	2.579	3.821	3.86	4.109	4.061	3.509	4.411	3.934	4.013	3.894	4.593	3.007	3.981	3.719	3.925	4.283	3.177	3.95	2.831	3.865	2.692	3.543	2.753	4.075	2.958	3.369	2.623	3.246	3.061	3.273	2.839	2.579	2.529	3.023	2.382	3.113	2.705	2.442	3.148	2.795	2.782	3.105	1.875
302.46	3.194	3.921	2.575	3.383	3.091	4.366	2.58	3.81	3.855	4.103	4.061	3.507	4.411	3.932	4.006	3.897	4.591	3.006	3.968	3.72	3.923	4.278	3.179	3.947	2.831	3.854	2.687	3.541	2.752	4.074	2.959	3.367	2.619	3.247	3.064	3.276	2.838	2.581	2.534	3.024	2.385	3.117	2.704	2.45	3.153	2.799	2.784	3.109	1.881
302.91	3.199	3.915	2.576	3.378	3.091	4.372	2.579	3.808	3.857	4.1	4.051	3.503	4.408	3.931	4.007	3.896	4.587	3.01	3.96	3.716	3.915	4.268	3.181	3.945	2.836	3.86	2.69	3.534	2.75	4.072	2.96	3.368	2.615	3.238	3.053	3.27	2.836	2.566	2.522	3.019	2.38	3.107	2.704	2.44	3.15	2.793	2.772	3.101	1.887
303.36	3.202	3.918	2.578	3.374	3.094	4.372	2.582	3.809	3.86	4.094	4.046	3.503	4.41	3.935	4.013	3.892	4.585	3.015	3.969	3.721	3.914	4.271	3.185	3.947	2.847	3.864	2.696	3.541	2.75	4.08	2.962	3.37	2.613	3.238	3.052	3.27	2.839	2.561	2.522	3.011	2.378	3.111	2.708	2.435	3.151	2.79	2.768	3.097	1.89
303.81	3.199	3.914	2.57	3.379	3.096	4.366	2.579	3.794	3.865	4.09	4.043	3.493	4.402	3.919	4.012	3.885	4.576	3.008	3.96	3.709	3.908	4.265	3.188	3.946	2.849	3.855	2.701	3.535	2.747	4.069	2.959	3.365	2.604	3.232	3.042	3.261	2.834	2.555	2.516	3	2.367	3.1	2.699	2.422	3.141	2.784	2.765	3.079	1.89
304.26	3.195	3.908	2.563	3.385	3.096	4.366	2.573	3.789	3.868	4.083	4.037	3.491	4.394	3.926	4.009	3.873	4.569	3.002	3.964	3.698	3.911	4.259	3.186	3.952	2.845	3.855	2.694	3.532	2.745	4.068	2.965	3.374	2.608	3.239	3.04	3.269	2.843	2.554	2.513	3.008	2.374	3.107	2.702	2.425	3.145	2.784	2.775	3.076	1.904
304.71	3.2	3.903	2.564	3.384	3.099	4.366	2.573	3.79	3.868	4.083	4.036	3.481	4.392	3.923	4.007	3.872	4.563	2.998	3.956	3.696	3.902	4.257	3.185	3.952	2.848	3.852	2.696	3.533	2.743	4.067	2.955	3.366	2.602	3.225	3.031	3.265	2.836	2.544	2.509	3	2.368	3.099	2.695	2.417	3.138	2.777	2.764	3.07	1.912
305.16	3.203	3.895	2.553	3.384	3.098	4.359	2.573	3.783	3.868	4.075	4.031	3.474	4.386	3.923	4.005	3.867	4.558	2.991	3.951	3.695	3.899	4.257	3.175	3.945	2.856	3.848	2.691	3.531	2.734	4.064	2.948	3.366	2.594	3.218	3.028	3.258	2.831	2.53	2.506	2.992	2.357	3.097	2.687	2.419	3.137	2.768	2.763	3.067	1.922
305.61	3.207	3.893	2.558	3.381	3.098	4.361	2.58	3.784	3.887	4.072	4.038	3.473	4.392	3.923	4.008	3.866	4.548	2.997	3.96	3.694	3.904	4.257	3.178	3.954	2.863	3.852	2.699	3.53	2.734	4.063	2.945	3.365	2.59	3.215	3.027	3.253	2.824	2.521	2.499	2.981	2.354	3.099	2.687	2.42	3.133	2.764	2.76	3.067	1.937
306.06	3.212	3.898	2.567	3.378	3.102	4.367	2.584	3.785	3.896	4.083	4.041	3.476	4.386	3.935	4.007	3.869	4.541	2.998	3.961	3.69	3.911	4.263	3.183	3.958	2.866	3.859	2.703	3.539	2.738	4.062	2.945	3.355	2.592	3.212	3.021	3.245	2.826	2.518	2.494	2.982	2.349	3.096	2.681	2.418	3.129	2.765	2.751	3.067	1.942
306.51	3.204	3.891	2.563	3.374	3.104	4.366	2.579	3.779	3.9	4.082	4.036	3.476	4.388	3.928	3.995	3.868	4.539	3	3.961	3.69	3.912	4.272	3.184	3.956	2.86	3.862	2.699	3.542	2.737	4.051	2.947	3.361	2.597	3.213	3.02	3.252	2.833	2.522	2.494	2.986	2.357	3.093	2.685	2.421	3.141	2.758	2.761	3.071	1.956
306.96	3.204	3.886	2.562	3.368	3.108	4.366	2.572	3.764	3.902	4.078	4.034	3.479	4.379	3.925	3.992	3.869	4.538	2.991	3.958	3.685	3.915	4.263	3.18	3.952	2.865	3.859	2.707	3.539	2.747	4.041	2.945	3.359	2.601	3.21	3.012	3.245	2.834	2.515	2.494	2.98	2.354	3.093	2.679	2.422	3.136	2.758	2.758	3.068	1.971
307.4	3.219	3.882	2.557	3.365	3.112	4.369	2.578	3.762	3.907	4.075	4.028	3.484	4.379	3.923	3.993	3.876	4.541	2.993	3.948	3.689	3.918	4.269	3.183	3.96	2.876	3.859	2.707	3.536	2.753	4.039	2.948	3.348	2.6	3.206	3.014	3.251	2.83	2.516	2.491	2.975	2.357	3.095	2.679	2.419	3.135	2.757	2.754	3.067	1.986
307.85	3.219	3.887	2.564	3.38	3.118	4.373	2.584	3.763	3.916	4.08	4.04	3.495	4.392	3.934	3.995	3.888	4.546	3.001	3.956	3.699	3.925	4.279	3.187	3.969	2.881	3.865	2.72	3.542	2.758	4.037	2.949	3.349	2.606	3.208	3.014	3.254	2.825	2.518	2.483	2.973	2.348	3.092	2.683	2.423	3.135	2.755	2.759	3.07	2.007
308.3	3.222	3.887	2.563	3.377	3.112	4.369	2.576	3.762	3.915	4.081	4.034	3.487	4.396	3.931	3.991	3.88	4.54	2.999	3.954	3.699	3.917	4.282	3.186	3.967	2.882	3.864	2.72	3.548	2.758	4.029	2.947	3.338	2.599	3.205	3.014	3.253	2.819	2.512	2.483	2.973	2.344	3.09	2.676	2.418	3.13	2.745	2.756	3.064	2.009
308.75	3.22	3.887	2.564	3.373	3.117	4.374	2.567	3.751	3.916	4.079	4.034	3.487	4.398	3.932	3.991	3.877	4.535	3.001	3.957	3.696	3.92	4.277	3.189	3.964	2.88	3.864	2.717	3.548	2.756	4.035	2.937	3.335	2.599	3.199	3.005	3.254	2.812	2.5	2.469	2.967	2.339	3.089	2.67	2.405	3.114	2.733	2.75	3.053	2.008
309.2	3.215	3.883	2.562	3.368	3.12	4.372	2.565	3.752	3.913	4.08	4.031	3.483	4.389	3.927	3.99	3.884	4.533	2.994	3.964	3.699	3.91	4.279	3.197	3.959	2.883	3.865	2.722	3.545	2.753	4.034	2.926	3.335	2.594	3.198	2.996	3.253	2.811	2.495	2.463	2.964	2.333	3.086	2.665	2.396	3.116	2.725	2.75	3.053	2.015
309.65	3.228	3.881	2.563	3.37	3.118	4.369	2.561	3.757	3.918	4.08	4.023	3.476	4.393	3.929	3.99	3.884	4.53	2.992	3.96	3.692	3.916	4.282	3.2	3.958	2.886	3.852	2.708	3.547	2.751	4.032	2.926	3.348	2.598	3.2	2.999	3.249	2.813	2.501	2.466	2.963	2.334	3.091	2.667	2.396	3.116	2.732	2.759	3.056	2.031
310.1	3.238	3.877	2.565	3.365	3.118	4.371	2.557	3.747	3.903	4.072	4.027	3.479	4.385	3.931	3.986	3.879	4.524	2.994	3.958	3.697	3.917	4.284	3.2	3.966	2.886	3.85	2.702	3.544	2.752	4.028	2.932	3.362	2.603	3.196	2.992	3.25	2.809	2.496	2.47	2.961	2.333	3.094	2.665	2.4	3.119	2.727	2.76	3.053	2.044
310.55	3.236	3.877	2.567	3.377	3.127	4.363	2.561	3.746	3.913	4.059	4.028	3.485	4.384	3.933	3.983	3.88	4.525	2.997	3.962	3.708	3.915	4.286	3.205	3.975	2.89	3.856	2.71	3.545	2.754	4.027	2.934	3.36	2.6	3.192	2.989	3.251	2.809	2.491	2.476	2.956	2.328	3.087	2.661	2.402	3.121	2.729	2.759	3.048	2.053
311	3.244	3.877	2.567	3.381	3.125	4.361	2.565	3.755	3.919	4.06	4.031	3.485	4.378	3.935	3.991	3.876	4.515	2.997	3.965	3.702	3.912	4.284	3.204	3.972	2.899	3.855	2.719	3.544	2.754	4.026	2.926	3.356	2.597	3.189	2.977	3.249	2.802	2.491	2.466	2.951	2.319	3.079	2.655	2.388	3.114	2.724	2.753	3.038	2.063
311.45	3.25	3.883	2.572	3.383	3.122	4.356	2.566	3.756	3.924	4.052	4.033	3.489	4.377	3.938	3.991	3.879	4.515	2.99	3.964	3.705	3.923	4.293	3.202	3.981	2.9	3.856	2.725	3.547	2.752	4.033	2.924	3.351	2.595	3.191	2.975	3.246	2.79	2.482	2.47	2.944	2.319	3.082	2.649	2.383	3.102	2.721	2.756	3.032	2.072
311.9	3.251	3.875	2.568	3.385	3.115	4.345	2.561	3.746	3.915	4.048	4.025	3.485	4.364	3.931	3.988	3.871	4.515	2.985	3.957	3.697	3.918	4.283	3.199	3.977	2.892	3.852	2.72	3.541	2.754	4.024	2.918	3.351	2.592	3.179	2.968	3.241	2.78	2.474	2.469	2.941	2.314	3.079	2.645	2.38	3.094	2.718	2.755	3.021	2.083
312.35	3.261	3.874	2.577	3.391	3.117	4.356	2.561	3.756	3.917	4.049	4.028	3.492	4.365	3.938	3.985	3.869	4.515	2.988	3.969	3.705	3.911	4.29	3.204	3.988	2.9	3.861	2.72	3.542	2.76	4.027	2.92	3.351	2.599	3.18	2.969	3.242	2.787	2.47	2.472	2.947	2.32	3.074	2.644	2.39	3.093	2.724	2.746	3.033	2.094
312.8	3.263	3.862	2.571	3.388	3.117	4.354	2.565	3.752	3.913	4.048	4.019	3.483	4.36	3.931	3.981	3.875	4.507	2.986	3.962	3.706	3.905	4.289	3.199	3.981	2.903	3.854	2.718	3.533	2.754	4.024	2.915	3.352	2.6	3.175	2.975	3.238	2.783	2.469	2.473	2.939	2.312	3.071	2.649	2.388	3.086	2.724	2.745	3.036	2.106
313.24	3.265	3.858	2.568	3.389	3.107	4.351	2.561	3.739	3.914	4.039	4.015	3.483	4.356	3.932	3.972	3.87	4.499	2.984	3.956	3.702	3.895	4.288	3.202	3.973	2.899	3.852	2.714	3.524	2.749	4.013	2.915	3.349	2.596	3.183	2.976	3.236	2.785	2.471	2.477	2.935	2.31	3.078	2.655	2.381	3.087	2.724	2.744	3.037	2.119
313.69	3.262	3.857	2.575	3.389	3.101	4.351	2.56	3.734	3.911	4.039	4.01	3.482	4.346	3.925	3.972	3.868	4.5	2.989	3.955	3.696	3.886	4.283	3.205	3.978	2.891	3.849	2.713	3.52	2.752	4.017	2.905	3.344	2.594	3.173	2.969	3.236	2.776	2.47	2.47	2.933	2.306	3.074	2.654	2.367	3.08	2.715	2.736	3.024	2.129
314.14	3.259	3.842	2.567	3.388	3.1	4.334	2.549	3.73	3.897	4.027	4	3.48	4.331	3.921	3.962	3.862	4.492	2.984	3.944	3.686	3.879	4.27	3.211	3.976	2.885	3.842	2.708	3.511	2.749	4.014	2.899	3.345	2.591	3.165	2.967	3.236	2.772	2.473	2.468	2.929	2.301	3.063	2.652	2.364	3.087	2.707	2.729	3.018	2.139
314.59	3.258	3.833	2.559	3.38	3.089	4.325	2.542	3.716	3.884	4.013	3.99	3.475	4.327	3.914	3.959	3.852	4.485	2.977	3.937	3.687	3.874	4.265	3.202	3.965	2.888	3.842	2.707	3.505	2.742	4.009	2.899	3.348	2.595	3.163	2.969	3.244	2.766	2.473	2.47	2.925	2.302	3.061	2.654	2.367	3.09	2.708	2.733	3.015	2.156
315.04	3.266	3.84	2.562	3.38	3.085	4.32	2.545	3.717	3.878	4.01	3.986	3.474	4.321	3.911	3.964	3.847	4.476	2.973	3.941	3.682	3.871	4.257	3.202	3.966	2.894	3.839	2.71	3.495	2.738	4.026	2.891	3.348	2.583	3.156	2.962	3.239	2.754	2.46	2.464	2.916	2.291	3.057	2.657	2.362	3.086	2.704	2.719	3.007	2.165
315.49	3.272	3.843	2.557	3.386	3.079	4.306	2.541	3.721	3.876	4.002	3.985	3.468	4.326	3.908	3.962	3.841	4.467	2.974	3.936	3.68	3.867	4.256	3.205	3.962	2.894	3.838	2.701	3.494	2.727	4.03	2.885	3.345	2.578	3.15	2.959	3.245	2.746	2.455	2.463	2.912	2.289	3.057	2.66	2.361	3.086	2.695	2.716	3.011	2.179
315.94	3.267	3.848	2.555	3.389	3.07	4.301	2.534	3.713	3.877	4.001	3.986	3.463	4.32	3.904	3.961	3.824	4.452	2.974	3.935	3.675	3.861	4.25	3.205	3.959	2.895	3.843	2.698	3.495	2.72	4.034	2.88	3.352	2.578	3.147	2.955	3.243	2.747	2.449	2.457	2.905	2.287	3.058	2.666	2.368	3.085	2.696	2.715	3.01	2.195
316.39	3.272	3.839	2.545	3.381	3.071	4.297	2.525	3.704	3.875	3.99	3.98	3.452	4.314	3.894	3.957	3.819	4.447	2.971	3.925	3.66	3.854	4.241	3.199	3.954	2.895	3.843	2.69	3.49	2.719	4.034	2.876	3.346	2.573	3.145	2.952	3.237	2.745	2.443	2.452	2.906	2.291	3.058	2.662	2.368	3.078	2.692	2.711	3.006	2.211
316.83	3.284	3.843	2.545	3.376	3.073	4.299	2.526	3.7	3.879	3.993	3.982	3.453	4.311	3.887	3.95	3.822	4.448	2.974	3.923	3.662	3.864	4.245	3.202	3.953	2.904	3.848	2.694	3.488	2.716	4.038	2.878	3.351	2.576	3.142	2.95	3.242	2.751	2.443	2.446	2.9	2.288	3.053	2.663	2.373	3.084	2.695	2.711	3.012	2.237
317.28	3.292	3.84	2.546	3.377	3.062	4.292	2.531	3.703	3.878	3.995	3.979	3.454	4.302	3.884	3.951	3.818	4.436	2.972	3.916	3.665	3.862	4.244	3.205	3.956	2.91	3.852	2.694	3.483	2.715	4.032	2.877	3.347	2.569	3.142	2.95	3.232	2.751	2.441	2.445	2.895	2.281	3.048	2.657	2.371	3.084	2.687	2.699	3.011	2.256
317.73	3.305	3.842	2.551	3.378	3.064	4.291	2.533	3.701	3.887	3.997	3.979	3.455	4.315	3.888	3.957	3.821	4.436	2.977	3.915	3.659	3.867	4.245	3.211	3.959	2.92	3.852	2.693	3.485	2.71	4.038	2.888	3.35	2.576	3.148	2.955	3.236	2.75	2.438	2.449	2.898	2.289	3.053	2.658	2.375	3.09	2.691	2.697	3.013	2.292
318.18	3.32	3.848	2.554	3.383	3.067	4.293	2.536	3.695	3.896	3.998	3.982	3.457	4.315	3.895	3.961	3.829	4.446	2.985	3.92	3.669	3.873	4.247	3.223	3.969	2.936	3.876	2.708	3.49	2.719	4.046	2.894	3.341	2.571	3.152	2.96	3.238	2.747	2.431	2.452	2.898	2.296	3.056	2.662	2.382	3.102	2.694	2.696	3.017	2.327
318.63	3.326	3.844	2.554	3.395	3.064	4.288	2.534	3.698	3.914	3.996	3.977	3.456	4.31	3.896	3.967	3.835	4.443	2.981	3.926	3.663	3.875	4.238	3.23	3.967	2.944	3.877	2.719	3.494	2.723	4.047	2.889	3.341	2.573	3.155	2.963	3.247	2.76	2.439	2.456	2.903	2.297	3.063	2.673	2.392	3.108	2.712	2.697	3.025	2.366
319.08	3.339	3.842	2.553	3.395	3.059	4.283	2.53	3.705	3.911	4.002	3.979	3.449	4.306	3.892	3.97	3.832	4.445	2.979	3.922	3.652	3.882	4.242	3.232	3.964	2.952	3.885	2.72	3.488	2.722	4.053	2.888	3.331	2.572	3.15	2.952	3.254	2.763	2.442	2.457	2.902	2.302	3.057	2.676	2.388	3.105	2.71	2.694	3.027	2.394
319.53	3.35	3.856	2.56	3.399	3.068	4.284	2.53	3.71	3.917	4.003	3.986	3.456	4.32	3.898	3.971	3.833	4.458	2.988	3.929	3.661	3.895	4.258	3.243	3.975	2.959	3.897	2.725	3.492	2.735	4.068	2.885	3.326	2.572	3.145	2.954	3.25	2.766	2.435	2.462	2.897	2.3	3.051	2.671	2.389	3.106	2.709	2.69	3.036	2.421
319.97	3.359	3.855	2.556	3.403	3.069	4.279	2.536	3.705	3.922	4.005	3.985	3.455	4.326	3.897	3.964	3.836	4.456	2.991	3.927	3.658	3.885	4.255	3.249	3.974	2.969	3.897	2.727	3.494	2.741	4.061	2.881	3.325	2.57	3.141	2.957	3.246	2.766	2.438	2.46	2.895	2.296	3.051	2.673	2.395	3.116	2.703	2.681	3.043	2.453
320.42	3.37	3.854	2.562	3.409	3.066	4.282	2.536	3.704	3.941	4.008	3.99	3.463	4.332	3.899	3.96	3.84	4.45	2.993	3.924	3.655	3.888	4.26	3.258	3.98	2.975	3.905	2.737	3.495	2.742	4.068	2.877	3.33	2.576	3.146	2.959	3.245	2.771	2.446	2.461	2.903	2.3	3.047	2.672	2.399	3.119	2.707	2.68	3.055	2.49
320.87	3.388	3.86	2.561	3.416	3.065	4.279	2.536	3.703	3.945	4.004	3.992	3.468	4.329	3.891	3.965	3.847	4.454	2.992	3.929	3.65	3.899	4.263	3.262	3.975	2.982	3.909	2.745	3.499	2.738	4.069	2.867	3.321	2.573	3.146	2.956	3.24	2.761	2.449	2.457	2.894	2.295	3.047	2.673	2.39	3.117	2.698	2.681	3.055	2.518
321.32	3.397	3.864	2.566	3.419	3.063	4.276	2.53	3.704	3.958	4.001	3.989	3.476	4.326	3.891	3.961	3.84	4.449	2.989	3.923	3.644	3.899	4.265	3.274	3.971	2.989	3.912	2.747	3.501	2.745	4.072	2.873	3.312	2.57	3.143	2.95	3.243	2.758	2.446	2.457	2.896	2.294	3.049	2.672	2.387	3.119	2.697	2.677	3.051	2.544
321.77	3.404	3.859	2.562	3.423	3.055	4.265	2.52	3.698	3.961	3.999	3.986	3.476	4.318	3.886	3.957	3.837	4.447	3	3.927	3.637	3.901	4.259	3.277	3.97	3.001	3.917	2.746	3.494	2.743	4.079	2.87	3.307	2.573	3.134	2.944	3.241	2.754	2.438	2.456	2.895	2.295	3.045	2.67	2.396	3.116	2.691	2.683	3.047	2.569
322.22	3.417	3.863	2.562	3.426	3.057	4.262	2.514	3.703	3.969	3.996	3.983	3.48	4.327	3.886	3.959	3.833	4.444	2.992	3.926	3.63	3.902	4.262	3.282	3.966	3.017	3.915	2.754	3.491	2.748	4.076	2.872	3.306	2.576	3.134	2.946	3.244	2.758	2.432	2.457	2.899	2.301	3.042	2.679	2.407	3.115	2.7	2.684	3.058	2.604
322.67	3.429	3.859	2.568	3.431	3.059	4.272	2.514	3.703	3.976	3.999	3.994	3.476	4.342	3.887	3.958	3.832	4.452	2.995	3.928	3.635	3.904	4.264	3.286	3.965	3.03	3.919	2.756	3.49	2.753	4.075	2.877	3.304	2.576	3.143	2.944	3.246	2.76	2.426	2.458	2.895	2.306	3.041	2.676	2.411	3.112	2.706	2.686	3.059	2.633
323.11	3.448	3.858	2.567	3.443	3.062	4.269	2.512	3.698	3.987	3.996	3.995	3.474	4.342	3.883	3.954	3.828	4.453	2.999	3.931	3.634	3.899	4.262	3.3	3.97	3.039	3.918	2.759	3.489	2.751	4.079	2.874	3.295	2.564	3.146	2.936	3.248	2.764	2.418	2.454	2.897	2.304	3.043	2.675	2.413	3.109	2.704	2.687	3.065	2.663
323.56	3.46	3.853	2.571	3.443	3.063	4.266	2.508	3.695	3.988	3.998	3.999	3.469	4.341	3.884	3.956	3.83	4.453	2.999	3.93	3.637	3.899	4.259	3.309	3.972	3.046	3.915	2.761	3.492	2.763	4.07	2.874	3.294	2.566	3.148	2.939	3.246	2.765	2.422	2.457	2.892	2.301	3.052	2.665	2.409	3.106	2.701	2.683	3.065	2.694
324.01	3.469	3.852	2.57	3.439	3.069	4.264	2.504	3.689	4	3.994	3.996	3.471	4.335	3.881	3.945	3.83	4.451	2.996	3.927	3.632	3.892	4.26	3.309	3.973	3.053	3.913	2.765	3.492	2.762	4.065	2.88	3.295	2.561	3.149	2.941	3.246	2.767	2.421	2.462	2.892	2.298	3.049	2.661	2.41	3.102	2.703	2.68	3.063	2.721
324.46	3.486	3.845	2.574	3.442	3.076	4.266	2.501	3.689	4.005	3.994	3.997	3.475	4.329	3.878	3.942	3.836	4.45	2.997	3.934	3.631	3.898	4.256	3.312	3.969	3.06	3.916	2.773	3.493	2.769	4.061	2.875	3.29	2.554	3.146	2.943	3.238	2.763	2.418	2.457	2.888	2.294	3.043	2.652	2.403	3.096	2.696	2.68	3.068	2.746
324.91	3.501	3.845	2.584	3.445	3.07	4.258	2.501	3.681	4.003	3.989	3.991	3.473	4.319	3.874	3.939	3.827	4.44	2.99	3.933	3.634	3.893	4.246	3.32	3.968	3.072	3.914	2.777	3.488	2.768	4.054	2.869	3.286	2.537	3.134	2.937	3.231	2.756	2.412	2.45	2.88	2.286	3.037	2.643	2.39	3.089	2.686	2.665	3.063	2.768
325.35	3.507	3.836	2.586	3.452	3.069	4.256	2.504	3.675	4.009	3.984	3.993	3.473	4.315	3.873	3.948	3.825	4.442	2.994	3.934	3.631	3.89	4.238	3.324	3.965	3.082	3.912	2.781	3.482	2.775	4.052	2.865	3.275	2.527	3.135	2.934	3.23	2.757	2.409	2.45	2.876	2.286	3.038	2.64	2.386	3.08	2.684	2.662	3.054	2.793
325.8	3.516	3.835	2.59	3.463	3.072	4.257	2.499	3.669	4.018	3.973	3.993	3.465	4.315	3.864	3.947	3.828	4.447	2.984	3.928	3.62	3.892	4.237	3.324	3.961	3.087	3.913	2.785	3.478	2.772	4.05	2.858	3.272	2.533	3.131	2.933	3.227	2.751	2.404	2.447	2.876	2.281	3.041	2.64	2.385	3.082	2.685	2.665	3.052	2.821
326.25	3.528	3.834	2.59	3.469	3.069	4.249	2.493	3.667	4.019	3.966	3.991	3.46	4.308	3.861	3.944	3.821	4.448	2.982	3.921	3.617	3.893	4.231	3.32	3.958	3.095	3.916	2.784	3.48	2.772	4.049	2.846	3.259	2.522	3.114	2.924	3.211	2.74	2.397	2.434	2.862	2.274	3.029	2.634	2.373	3.07	2.674	2.653	3.047	2.836
326.7	3.522	3.834	2.586	3.465	3.066	4.237	2.492	3.659	4.02	3.963	3.995	3.459	4.299	3.85	3.935	3.815	4.44	2.977	3.917	3.601	3.882	4.226	3.317	3.957	3.086	3.899	2.785	3.477	2.767	4.039	2.841	3.26	2.521	3.11	2.911	3.209	2.746	2.395	2.429	2.854	2.268	3.025	2.634	2.366	3.058	2.666	2.648	3.049	2.855
327.15	3.525	3.841	2.585	3.458	3.062	4.229	2.49	3.651	4.016	3.957	3.995	3.455	4.299	3.848	3.927	3.802	4.435	2.981	3.905	3.596	3.877	4.228	3.311	3.948	3.089	3.898	2.781	3.464	2.763	4.038	2.831	3.253	2.515	3.102	2.907	3.197	2.731	2.385	2.418	2.843	2.262	3.005	2.616	2.352	3.044	2.652	2.637	3.041	2.864
327.59	3.528	3.839	2.585	3.456	3.058	4.231	2.487	3.642	4.018	3.954	3.99	3.46	4.299	3.851	3.919	3.798	4.424	2.981	3.905	3.597	3.87	4.218	3.315	3.945	3.099	3.891	2.781	3.464	2.766	4.035	2.825	3.251	2.512	3.107	2.91	3.186	2.722	2.374	2.407	2.84	2.253	3.001	2.607	2.343	3.042	2.647	2.628	3.037	2.883
328.04	3.531	3.828	2.579	3.456	3.051	4.225	2.481	3.633	4.022	3.943	3.981	3.45	4.285	3.848	3.912	3.792	4.413	2.973	3.904	3.588	3.857	4.202	3.312	3.932	3.101	3.883	2.773	3.459	2.758	4.026	2.823	3.249	2.511	3.103	2.905	3.192	2.713	2.37	2.396	2.838	2.256	3.001	2.61	2.34	3.036	2.642	2.621	3.031	2.896
328.49	3.538	3.818	2.578	3.45	3.048	4.218	2.468	3.627	4.015	3.943	3.984	3.45	4.268	3.838	3.908	3.778	4.398	2.962	3.906	3.586	3.854	4.195	3.314	3.923	3.099	3.871	2.767	3.449	2.752	4.023	2.817	3.248	2.508	3.106	2.897	3.194	2.714	2.371	2.391	2.836	2.259	2.992	2.61	2.341	3.027	2.64	2.619	3.022	2.912
328.94	3.55	3.823	2.575	3.45	3.048	4.214	2.466	3.632	4.006	3.937	3.973	3.444	4.261	3.836	3.915	3.776	4.397	2.959	3.907	3.582	3.858	4.19	3.306	3.922	3.107	3.867	2.764	3.445	2.748	4.019	2.817	3.239	2.501	3.096	2.891	3.189	2.705	2.365	2.384	2.823	2.254	2.987	2.601	2.339	3.017	2.632	2.619	3.008	2.922
329.39	3.542	3.82	2.574	3.441	3.044	4.203	2.462	3.622	4.006	3.926	3.963	3.433	4.248	3.83	3.909	3.766	4.38	2.954	3.886	3.574	3.851	4.179	3.31	3.915	3.104	3.861	2.753	3.432	2.739	4.016	2.816	3.244	2.497	3.091	2.891	3.187	2.701	2.367	2.386	2.819	2.249	2.984	2.595	2.341	3.011	2.626	2.618	3.003	2.939
329.83	3.546	3.822	2.567	3.435	3.034	4.197	2.463	3.617	3.997	3.921	3.96	3.429	4.252	3.82	3.904	3.767	4.386	2.952	3.887	3.573	3.845	4.172	3.312	3.916	3.108	3.863	2.757	3.425	2.73	4.01	2.802	3.241	2.495	3.091	2.884	3.181	2.695	2.36	2.38	2.804	2.247	2.979	2.591	2.338	2.995	2.617	2.611	3.003	2.953
330.28	3.553	3.822	2.579	3.44	3.042	4.205	2.471	3.624	4.005	3.924	3.959	3.436	4.256	3.824	3.91	3.772	4.383	2.942	3.886	3.573	3.853	4.176	3.316	3.917	3.114	3.854	2.763	3.426	2.738	4.011	2.803	3.242	2.49	3.095	2.881	3.185	2.692	2.359	2.376	2.802	2.243	2.974	2.583	2.33	2.987	2.617	2.604	3.001	2.972
330.73	3.559	3.807	2.575	3.439	3.042	4.202	2.464	3.611	4.01	3.92	3.962	3.43	4.25	3.822	3.905	3.77	4.371	2.94	3.88	3.575	3.852	4.17	3.322	3.924	3.12	3.858	2.753	3.419	2.733	4.007	2.805	3.238	2.483	3.095	2.879	3.179	2.685	2.36	2.366	2.787	2.228	2.967	2.569	2.321	2.98	2.612	2.602	2.996	2.983
331.18	3.566	3.821	2.575	3.442	3.034	4.194	2.465	3.605	4.022	3.916	3.955	3.428	4.242	3.822	3.908	3.763	4.363	2.947	3.88	3.574	3.855	4.168	3.323	3.924	3.124	3.858	2.756	3.419	2.73	4.007	2.801	3.233	2.475	3.085	2.876	3.181	2.682	2.365	2.362	2.784	2.216	2.967	2.566	2.318	2.969	2.608	2.593	2.998	2.999
331.62	3.564	3.824	2.577	3.439	3.036	4.194	2.469	3.609	4.019	3.912	3.95	3.431	4.239	3.824	3.906	3.763	4.356	2.942	3.879	3.573	3.862	4.16	3.324	3.923	3.13	3.858	2.756	3.41	2.733	4.004	2.801	3.238	2.483	3.078	2.879	3.174	2.68	2.364	2.363	2.777	2.215	2.961	2.562	2.316	2.964	2.609	2.588	2.996	3.011
332.07	3.57	3.828	2.58	3.447	3.039	4.198	2.469	3.607	4.024	3.911	3.95	3.441	4.241	3.829	3.91	3.765	4.36	2.946	3.876	3.578	3.865	4.166	3.327	3.927	3.146	3.864	2.766	3.414	2.736	4.003	2.8	3.238	2.484	3.081	2.873	3.176	2.677	2.357	2.361	2.777	2.216	2.949	2.562	2.319	2.959	2.612	2.59	3.004	3.031
332.52	3.572	3.827	2.57	3.448	3.029	4.207	2.466	3.606	4.022	3.919	3.951	3.437	4.239	3.831	3.919	3.765	4.361	2.953	3.872	3.584	3.871	4.167	3.332	3.928	3.149	3.866	2.774	3.406	2.738	4.009	2.791	3.23	2.485	3.082	2.869	3.176	2.68	2.364	2.352	2.78	2.217	2.951	2.563	2.315	2.958	2.611	2.59	2.996	3.055
332.97	3.57	3.829	2.567	3.448	3.018	4.194	2.462	3.591	4.024	3.91	3.946	3.43	4.239	3.831	3.918	3.762	4.366	2.949	3.864	3.581	3.864	4.175	3.334	3.924	3.152	3.866	2.77	3.394	2.728	4.005	2.789	3.233	2.49	3.079	2.858	3.175	2.681	2.363	2.35	2.781	2.211	2.939	2.558	2.32	2.96	2.611	2.591	2.989	3.079
333.41	3.576	3.836	2.566	3.446	3.018	4.2	2.457	3.592	4.038	3.914	3.951	3.434	4.245	3.835	3.923	3.766	4.364	2.954	3.867	3.58	3.877	4.185	3.333	3.923	3.158	3.864	2.774	3.401	2.73	4.007	2.791	3.234	2.5	3.084	2.853	3.185	2.684	2.364	2.355	2.779	2.212	2.937	2.563	2.329	2.963	2.615	2.598	2.999	3.1
333.86	3.587	3.844	2.571	3.451	3.023	4.2	2.452	3.597	4.044	3.917	3.947	3.436	4.248	3.836	3.912	3.765	4.364	2.951	3.871	3.571	3.877	4.187	3.342	3.933	3.164	3.873	2.78	3.407	2.731	4.014	2.787	3.238	2.498	3.088	2.85	3.177	2.677	2.358	2.355	2.772	2.208	2.924	2.562	2.326	2.964	2.61	2.591	3.002	3.116
334.31	3.595	3.844	2.572	3.45	3.027	4.194	2.455	3.598	4.052	3.927	3.949	3.443	4.25	3.837	3.918	3.76	4.358	2.96	3.879	3.572	3.88	4.187	3.345	3.932	3.176	3.875	2.783	3.412	2.736	4.018	2.785	3.239	2.495	3.087	2.845	3.183	2.678	2.359	2.355	2.767	2.21	2.918	2.554	2.33	2.954	2.606	2.586	2.996	3.139
334.76	3.598	3.843	2.572	3.454	3.032	4.197	2.454	3.598	4.054	3.919	3.947	3.444	4.243	3.833	3.914	3.756	4.353	2.963	3.876	3.577	3.875	4.189	3.351	3.928	3.181	3.878	2.791	3.404	2.739	4.016	2.792	3.25	2.505	3.097	2.851	3.196	2.685	2.368	2.368	2.776	2.211	2.922	2.564	2.344	2.957	2.611	2.59	3.006	3.174
335.2	3.615	3.842	2.579	3.462	3.036	4.201	2.455	3.6	4.064	3.923	3.947	3.447	4.249	3.837	3.921	3.754	4.357	2.966	3.875	3.593	3.89	4.196	3.359	3.923	3.194	3.879	2.794	3.405	2.746	4.026	2.783	3.239	2.499	3.094	2.841	3.183	2.67	2.368	2.362	2.773	2.2	2.911	2.555	2.338	2.952	2.602	2.585	2.997	3.193
335.65	3.627	3.838	2.577	3.468	3.043	4.203	2.456	3.596	4.073	3.922	3.95	3.445	4.251	3.836	3.926	3.759	4.356	2.962	3.876	3.596	3.899	4.197	3.371	3.921	3.203	3.886	2.792	3.415	2.745	4.027	2.787	3.241	2.498	3.092	2.843	3.182	2.677	2.372	2.361	2.775	2.201	2.921	2.563	2.34	2.954	2.604	2.586	3.003	3.227
336.1	3.639	3.843	2.579	3.469	3.041	4.199	2.456	3.586	4.08	3.92	3.947	3.443	4.249	3.831	3.93	3.762	4.363	2.964	3.874	3.591	3.901	4.194	3.378	3.915	3.208	3.888	2.793	3.41	2.74	4.027	2.792	3.245	2.496	3.086	2.839	3.186	2.676	2.375	2.361	2.766	2.206	2.919	2.568	2.347	2.95	2.599	2.585	3.004	3.248
336.54	3.651	3.848	2.582	3.473	3.042	4.205	2.454	3.582	4.087	3.925	3.949	3.447	4.26	3.826	3.923	3.767	4.369	2.963	3.882	3.584	3.909	4.201	3.388	3.922	3.218	3.896	2.799	3.41	2.742	4.02	2.796	3.25	2.495	3.09	2.847	3.184	2.674	2.378	2.365	2.765	2.204	2.918	2.573	2.348	2.951	2.603	2.589	3.002	3.283
336.99	3.647	3.852	2.588	3.482	3.045	4.205	2.447	3.577	4.091	3.911	3.949	3.434	4.262	3.821	3.927	3.766	4.379	2.968	3.877	3.585	3.909	4.201	3.396	3.929	3.233	3.905	2.804	3.402	2.745	4.021	2.804	3.253	2.501	3.092	2.856	3.19	2.674	2.376	2.371	2.767	2.208	2.925	2.574	2.353	2.957	2.61	2.595	3.006	3.313
337.44	3.645	3.851	2.586	3.48	3.043	4.198	2.448	3.564	4.096	3.908	3.951	3.424	4.26	3.815	3.916	3.76	4.376	2.963	3.871	3.578	3.902	4.197	3.407	3.919	3.24	3.913	2.803	3.395	2.739	4.016	2.8	3.25	2.497	3.096	2.85	3.193	2.676	2.367	2.371	2.769	2.206	2.925	2.58	2.348	2.965	2.611	2.589	3.013	3.343
337.89	3.661	3.855	2.586	3.492	3.039	4.197	2.448	3.569	4.108	3.912	3.952	3.428	4.274	3.831	3.919	3.763	4.384	2.972	3.877	3.581	3.906	4.207	3.41	3.925	3.255	3.919	2.811	3.395	2.749	4.019	2.807	3.242	2.494	3.102	2.842	3.193	2.675	2.353	2.368	2.77	2.208	2.924	2.58	2.34	2.965	2.616	2.584	3.016	3.364
338.33	3.676	3.85	2.588	3.492	3.045	4.194	2.438	3.569	4.117	3.908	3.954	3.418	4.262	3.839	3.925	3.755	4.376	2.972	3.876	3.573	3.91	4.202	3.413	3.921	3.265	3.917	2.811	3.396	2.75	4.021	2.813	3.241	2.491	3.1	2.842	3.197	2.676	2.355	2.366	2.777	2.206	2.917	2.582	2.345	2.97	2.622	2.585	3.017	3.397
338.78	3.694	3.856	2.586	3.491	3.044	4.194	2.435	3.567	4.121	3.907	3.955	3.412	4.268	3.841	3.929	3.756	4.386	2.972	3.878	3.578	3.906	4.199	3.423	3.923	3.279	3.925	2.81	3.403	2.75	4.022	2.812	3.24	2.49	3.099	2.843	3.198	2.675	2.355	2.363	2.772	2.205	2.918	2.587	2.356	2.971	2.618	2.577	3.019	3.418
339.23	3.71	3.874	2.599	3.506	3.051	4.197	2.444	3.58	4.132	3.908	3.962	3.419	4.27	3.849	3.936	3.765	4.396	2.979	3.89	3.579	3.913	4.201	3.435	3.922	3.292	3.931	2.823	3.412	2.761	4.032	2.801	3.24	2.492	3.097	2.838	3.192	2.671	2.354	2.363	2.769	2.206	2.917	2.587	2.353	2.961	2.61	2.569	3.023	3.447
339.67	3.722	3.876	2.604	3.511	3.052	4.2	2.443	3.58	4.132	3.909	3.965	3.422	4.266	3.851	3.942	3.773	4.389	2.975	3.889	3.578	3.913	4.204	3.448	3.919	3.306	3.935	2.826	3.415	2.768	4.029	2.796	3.237	2.491	3.097	2.834	3.185	2.667	2.343	2.357	2.764	2.2	2.91	2.59	2.349	2.959	2.601	2.565	3.014	3.469
340.12	3.738	3.883	2.612	3.524	3.053	4.202	2.442	3.585	4.153	3.918	3.974	3.42	4.272	3.854	3.952	3.779	4.392	2.981	3.89	3.583	3.921	4.213	3.46	3.918	3.324	3.948	2.835	3.42	2.772	4.024	2.794	3.232	2.48	3.096	2.827	3.182	2.664	2.346	2.362	2.761	2.192	2.906	2.59	2.343	2.956	2.596	2.555	3.018	3.498
340.57	3.755	3.885	2.613	3.531	3.05	4.198	2.439	3.583	4.164	3.915	3.968	3.408	4.267	3.856	3.95	3.777	4.388	2.979	3.889	3.576	3.921	4.203	3.468	3.917	3.332	3.952	2.83	3.416	2.77	4.03	2.802	3.233	2.489	3.092	2.831	3.183	2.661	2.349	2.361	2.767	2.192	2.908	2.604	2.347	2.961	2.596	2.558	3.021	3.533
341.01	3.778	3.886	2.63	3.542	3.056	4.194	2.447	3.582	4.171	3.913	3.966	3.41	4.272	3.853	3.958	3.775	4.39	2.978	3.897	3.572	3.927	4.204	3.484	3.918	3.347	3.961	2.829	3.427	2.772	4.025	2.805	3.233	2.489	3.087	2.83	3.178	2.658	2.346	2.363	2.764	2.193	2.901	2.602	2.349	2.955	2.594	2.558	3.032	3.558
341.46	3.796	3.89	2.631	3.549	3.062	4.197	2.45	3.584	4.179	3.915	3.967	3.406	4.276	3.854	3.965	3.78	4.38	2.98	3.896	3.572	3.925	4.199	3.498	3.927	3.36	3.958	2.835	3.436	2.783	4.029	2.801	3.227	2.484	3.085	2.835	3.181	2.65	2.342	2.367	2.755	2.195	2.907	2.607	2.345	2.954	2.593	2.554	3.027	3.581
341.91	3.812	3.892	2.63	3.555	3.065	4.2	2.458	3.592	4.192	3.925	3.967	3.403	4.279	3.854	3.97	3.788	4.385	2.984	3.899	3.565	3.923	4.194	3.516	3.929	3.374	3.966	2.841	3.436	2.786	4.038	2.804	3.221	2.482	3.09	2.831	3.173	2.637	2.335	2.364	2.752	2.196	2.911	2.606	2.34	2.947	2.59	2.541	3.02	3.603
342.36	3.82	3.886	2.629	3.558	3.063	4.199	2.455	3.588	4.2	3.923	3.964	3.401	4.281	3.858	3.977	3.789	4.382	2.989	3.904	3.572	3.927	4.196	3.528	3.921	3.383	3.968	2.839	3.425	2.79	4.04	2.81	3.219	2.487	3.086	2.828	3.176	2.63	2.338	2.363	2.761	2.192	2.912	2.606	2.342	2.943	2.591	2.54	3.021	3.633
342.8	3.836	3.896	2.633	3.561	3.066	4.202	2.45	3.589	4.202	3.914	3.966	3.4	4.282	3.867	3.974	3.793	4.384	2.992	3.901	3.568	3.926	4.203	3.545	3.92	3.401	3.968	2.845	3.425	2.795	4.041	2.825	3.217	2.482	3.094	2.831	3.179	2.632	2.335	2.363	2.765	2.197	2.91	2.615	2.339	2.946	2.591	2.545	3.036	3.665
343.25	3.856	3.897	2.634	3.567	3.065	4.203	2.445	3.578	4.214	3.923	3.969	3.395	4.284	3.876	3.977	3.796	4.383	2.988	3.912	3.557	3.937	4.207	3.565	3.923	3.408	3.967	2.845	3.424	2.802	4.049	2.817	3.21	2.471	3.093	2.827	3.17	2.628	2.32	2.35	2.755	2.188	2.911	2.605	2.335	2.929	2.589	2.536	3.025	3.683
343.7	3.864	3.899	2.632	3.568	3.061	4.203	2.446	3.578	4.216	3.916	3.969	3.391	4.281	3.871	3.977	3.794	4.381	2.986	3.911	3.545	3.934	4.204	3.568	3.92	3.429	3.979	2.849	3.423	2.8	4.051	2.816	3.214	2.475	3.096	2.846	3.18	2.631	2.311	2.352	2.754	2.195	2.916	2.611	2.339	2.929	2.592	2.528	3.023	3.71
344.14	3.88	3.906	2.635	3.572	3.06	4.204	2.443	3.588	4.228	3.921	3.97	3.397	4.283	3.876	3.983	3.806	4.39	2.988	3.918	3.534	3.942	4.213	3.579	3.925	3.445	3.989	2.859	3.424	2.803	4.056	2.809	3.205	2.469	3.096	2.84	3.174	2.622	2.307	2.35	2.749	2.191	2.907	2.604	2.338	2.918	2.59	2.519	3.019	3.73
344.59	3.896	3.915	2.644	3.582	3.071	4.208	2.451	3.6	4.244	3.927	3.981	3.403	4.279	3.879	3.987	3.806	4.389	2.992	3.919	3.543	3.956	4.223	3.589	3.938	3.462	3.991	2.868	3.432	2.815	4.064	2.807	3.208	2.473	3.096	2.845	3.176	2.625	2.305	2.35	2.753	2.184	2.912	2.603	2.335	2.917	2.593	2.515	3.019	3.768
345.03	3.917	3.923	2.647	3.589	3.069	4.207	2.453	3.599	4.257	3.922	3.98	3.407	4.272	3.882	3.996	3.807	4.383	3.004	3.912	3.547	3.953	4.23	3.602	3.927	3.483	3.997	2.874	3.43	2.821	4.074	2.804	3.209	2.477	3.105	2.847	3.175	2.624	2.306	2.349	2.754	2.185	2.922	2.602	2.342	2.911	2.595	2.514	3.035	3.793
345.48	3.941	3.936	2.653	3.599	3.072	4.21	2.463	3.601	4.277	3.934	3.976	3.421	4.279	3.901	3.998	3.815	4.379	3.012	3.924	3.539	3.961	4.238	3.614	3.931	3.499	4.008	2.879	3.439	2.831	4.081	2.8	3.204	2.467	3.109	2.843	3.179	2.626	2.309	2.344	2.755	2.185	2.92	2.61	2.342	2.905	2.596	2.513	3.044	3.822
345.93	3.968	3.938	2.668	3.606	3.082	4.215	2.461	3.607	4.298	3.946	3.987	3.43	4.291	3.909	4.011	3.822	4.381	3.02	3.931	3.549	3.974	4.251	3.618	3.935	3.519	4.008	2.892	3.445	2.838	4.093	2.799	3.203	2.469	3.118	2.847	3.185	2.629	2.315	2.339	2.759	2.182	2.923	2.607	2.347	2.903	2.59	2.514	3.048	3.844
346.37	3.98	3.937	2.675	3.61	3.094	4.229	2.462	3.606	4.305	3.948	3.986	3.431	4.294	3.907	4.011	3.822	4.383	3.022	3.939	3.551	3.977	4.251	3.634	3.934	3.535	4.017	2.894	3.45	2.841	4.097	2.8	3.213	2.47	3.116	2.851	3.19	2.641	2.327	2.331	2.762	2.181	2.925	2.619	2.353	2.904	2.582	2.518	3.049	3.876
346.82	3.991	3.951	2.68	3.621	3.099	4.242	2.47	3.607	4.316	3.948	3.991	3.445	4.295	3.909	4.017	3.829	4.39	3.028	3.942	3.551	3.983	4.261	3.643	3.931	3.55	4.03	2.901	3.452	2.859	4.107	2.802	3.217	2.469	3.117	2.848	3.179	2.635	2.325	2.331	2.758	2.181	2.924	2.615	2.346	2.908	2.571	2.509	3.053	3.893
347.27	4	3.955	2.682	3.628	3.102	4.248	2.478	3.606	4.325	3.949	3.995	3.449	4.296	3.915	4.017	3.828	4.39	3.033	3.944	3.547	3.992	4.265	3.646	3.925	3.556	4.037	2.906	3.451	2.864	4.109	2.8	3.215	2.468	3.121	2.838	3.164	2.636	2.319	2.322	2.761	2.175	2.922	2.604	2.335	2.909	2.568	2.502	3.053	3.916
347.71	4.011	3.949	2.677	3.62	3.098	4.251	2.473	3.597	4.323	3.942	3.989	3.439	4.292	3.914	4.016	3.821	4.385	3.036	3.932	3.54	3.993	4.27	3.648	3.924	3.558	4.034	2.905	3.444	2.863	4.109	2.808	3.214	2.459	3.128	2.837	3.166	2.638	2.31	2.315	2.764	2.174	2.924	2.598	2.34	2.917	2.567	2.501	3.05	3.933
348.16	4.029	3.956	2.68	3.617	3.104	4.254	2.479	3.604	4.334	3.948	3.986	3.448	4.296	3.926	4.015	3.837	4.401	3.035	3.942	3.545	4.006	4.284	3.653	3.933	3.565	4.044	2.912	3.444	2.874	4.13	2.807	3.217	2.459	3.134	2.84	3.169	2.64	2.319	2.323	2.764	2.182	2.924	2.601	2.345	2.912	2.574	2.505	3.057	3.968
348.61	4.039	3.954	2.688	3.614	3.108	4.257	2.477	3.593	4.344	3.941	3.982	3.451	4.297	3.931	4.022	3.837	4.4	3.035	3.935	3.533	4.004	4.29	3.66	3.933	3.569	4.047	2.916	3.444	2.878	4.134	2.814	3.229	2.464	3.145	2.856	3.176	2.649	2.326	2.323	2.769	2.199	2.935	2.606	2.357	2.915	2.58	2.517	3.066	3.991
349.05	4.05	3.958	2.687	3.615	3.111	4.266	2.483	3.603	4.355	3.943	3.987	3.457	4.307	3.927	4.029	3.838	4.399	3.04	3.937	3.529	4.013	4.295	3.665	3.93	3.575	4.049	2.919	3.439	2.88	4.134	2.799	3.222	2.45	3.15	2.85	3.16	2.64	2.323	2.31	2.757	2.196	2.932	2.585	2.347	2.904	2.573	2.502	3.062	4
349.5	4.048	3.967	2.686	3.609	3.109	4.274	2.482	3.607	4.365	3.947	3.994	3.461	4.312	3.932	4.029	3.842	4.406	3.043	3.935	3.531	4.017	4.296	3.673	3.93	3.587	4.058	2.929	3.426	2.894	4.146	2.801	3.234	2.446	3.16	2.853	3.171	2.64	2.317	2.31	2.753	2.187	2.941	2.589	2.347	2.907	2.572	2.493	3.056	4.017
349.94	4.054	3.963	2.686	3.611	3.112	4.278	2.489	3.614	4.382	3.948	4.003	3.472	4.31	3.933	4.027	3.837	4.412	3.042	3.941	3.533	4.023	4.294	3.677	3.924	3.586	4.071	2.934	3.429	2.905	4.152	2.809	3.236	2.446	3.167	2.85	3.177	2.642	2.316	2.305	2.76	2.181	2.938	2.586	2.342	2.903	2.568	2.487	3.06	4.03
350.39	4.06	3.965	2.683	3.616	3.119	4.276	2.49	3.601	4.385	3.936	4.01	3.478	4.305	3.936	4.019	3.828	4.414	3.041	3.945	3.531	4.032	4.291	3.669	3.926	3.589	4.073	2.933	3.425	2.906	4.151	2.8	3.24	2.449	3.162	2.854	3.186	2.65	2.326	2.301	2.754	2.176	2.936	2.583	2.342	2.906	2.562	2.488	3.066	4.048
350.84	4.077	3.977	2.679	3.622	3.128	4.287	2.497	3.605	4.393	3.941	4.03	3.478	4.302	3.951	4.027	3.828	4.413	3.037	3.941	3.528	4.036	4.301	3.676	3.932	3.608	4.079	2.941	3.434	2.908	4.157	2.796	3.245	2.447	3.163	2.854	3.191	2.658	2.324	2.299	2.753	2.182	2.938	2.586	2.345	2.905	2.557	2.488	3.072	4.063
351.28	4.072	3.973	2.678	3.623	3.125	4.294	2.498	3.602	4.397	3.946	4.027	3.479	4.293	3.948	4.02	3.834	4.407	3.036	3.943	3.53	4.035	4.298	3.676	3.934	3.61	4.083	2.937	3.432	2.91	4.15	2.789	3.246	2.442	3.157	2.846	3.182	2.648	2.323	2.289	2.741	2.162	2.931	2.586	2.34	2.897	2.547	2.474	3.05	4.064
351.73	4.077	3.98	2.692	3.625	3.129	4.306	2.511	3.605	4.405	3.951	4.034	3.486	4.298	3.945	4.032	3.844	4.417	3.043	3.937	3.537	4.045	4.298	3.669	3.945	3.622	4.086	2.943	3.443	2.919	4.15	2.786	3.235	2.446	3.162	2.846	3.18	2.643	2.322	2.29	2.749	2.166	2.93	2.593	2.33	2.909	2.538	2.474	3.057	4.068
352.17	4.078	3.984	2.695	3.625	3.135	4.309	2.509	3.595	4.408	3.951	4.031	3.485	4.299	3.95	4.031	3.844	4.415	3.04	3.94	3.534	4.042	4.29	3.669	3.936	3.619	4.079	2.942	3.433	2.922	4.139	2.783	3.236	2.441	3.16	2.836	3.179	2.638	2.327	2.281	2.753	2.165	2.927	2.582	2.325	2.9	2.528	2.473	3.065	4.072
352.62	4.085	3.981	2.694	3.622	3.134	4.307	2.511	3.586	4.4	3.948	4.032	3.477	4.294	3.949	4.027	3.832	4.411	3.041	3.932	3.546	4.037	4.286	3.667	3.934	3.622	4.066	2.93	3.419	2.931	4.133	2.789	3.237	2.445	3.162	2.832	3.186	2.642	2.331	2.289	2.754	2.162	2.94	2.581	2.325	2.908	2.521	2.478	3.058	4.076
353.07	4.092	3.981	2.695	3.624	3.14	4.308	2.502	3.585	4.394	3.941	4.04	3.469	4.297	3.949	4.029	3.836	4.414	3.038	3.94	3.534	4.026	4.282	3.666	3.925	3.62	4.076	2.932	3.42	2.931	4.123	2.785	3.234	2.448	3.174	2.838	3.185	2.643	2.332	2.284	2.753	2.166	2.937	2.581	2.333	2.906	2.518	2.475	3.063	4.078
353.51	4.081	3.969	2.698	3.62	3.136	4.307	2.496	3.584	4.386	3.948	4.042	3.454	4.293	3.948	4.022	3.828	4.41	3.015	3.934	3.527	4.024	4.267	3.658	3.934	3.617	4.075	2.93	3.415	2.923	4.116	2.781	3.223	2.435	3.169	2.83	3.177	2.643	2.324	2.282	2.746	2.16	2.923	2.576	2.323	2.904	2.509	2.465	3.052	4.08
353.96	4.088	3.965	2.699	3.616	3.137	4.315	2.495	3.591	4.393	3.949	4.047	3.454	4.285	3.94	4.029	3.829	4.419	3.017	3.931	3.537	4.023	4.263	3.653	3.928	3.62	4.068	2.929	3.413	2.931	4.114	2.775	3.229	2.433	3.165	2.822	3.166	2.634	2.317	2.282	2.743	2.147	2.912	2.566	2.306	2.898	2.499	2.455	3.04	4.068
354.4	4.083	3.964	2.691	3.615	3.131	4.323	2.489	3.587	4.398	3.932	4.048	3.446	4.278	3.942	4.032	3.83	4.419	3.023	3.934	3.541	4.023	4.259	3.663	3.929	3.626	4.065	2.931	3.412	2.943	4.112	2.783	3.232	2.431	3.158	2.825	3.17	2.631	2.315	2.291	2.738	2.153	2.912	2.571	2.301	2.896	2.497	2.449	3.038	4.071
354.85	4.086	3.961	2.692	3.621	3.128	4.322	2.484	3.584	4.4	3.93	4.053	3.447	4.26	3.944	4.04	3.827	4.419	3.019	3.926	3.526	4.025	4.256	3.662	3.934	3.623	4.051	2.935	3.41	2.948	4.114	2.777	3.232	2.424	3.158	2.825	3.172	2.623	2.312	2.288	2.731	2.146	2.914	2.565	2.3	2.892	2.497	2.442	3.035	4.083
355.3	4.086	3.956	2.695	3.617	3.125	4.322	2.482	3.588	4.409	3.935	4.052	3.443	4.263	3.948	4.041	3.828	4.409	3.018	3.93	3.533	4.028	4.257	3.666	3.942	3.621	4.046	2.932	3.412	2.941	4.113	2.772	3.228	2.424	3.156	2.824	3.18	2.623	2.31	2.285	2.727	2.142	2.911	2.561	2.293	2.883	2.502	2.438	3.033	4.089
355.74	4.085	3.951	2.693	3.613	3.118	4.327	2.48	3.594	4.408	3.93	4.051	3.428	4.249	3.943	4.042	3.829	4.396	3.011	3.92	3.531	4.032	4.255	3.663	3.948	3.628	4.038	2.933	3.409	2.941	4.11	2.774	3.226	2.417	3.156	2.828	3.188	2.622	2.307	2.295	2.733	2.147	2.906	2.568	2.297	2.878	2.498	2.441	3.032	4.1
356.19	4.087	3.946	2.689	3.605	3.117	4.329	2.472	3.589	4.412	3.932	4.053	3.423	4.249	3.948	4.04	3.831	4.394	3.008	3.911	3.532	4.029	4.255	3.666	3.941	3.637	4.036	2.929	3.403	2.937	4.107	2.773	3.23	2.421	3.154	2.831	3.182	2.624	2.309	2.304	2.733	2.152	2.902	2.577	2.298	2.875	2.502	2.439	3.032	4.102
356.63	4.096	3.945	2.685	3.611	3.116	4.339	2.469	3.579	4.411	3.919	4.051	3.42	4.245	3.934	4.046	3.82	4.389	3.011	3.911	3.528	4.027	4.251	3.666	3.939	3.643	4.026	2.925	3.399	2.925	4.094	2.772	3.231	2.42	3.145	2.829	3.181	2.625	2.308	2.294	2.733	2.155	2.907	2.574	2.293	2.882	2.495	2.429	3.034	4.098
357.08	4.097	3.948	2.677	3.611	3.118	4.348	2.464	3.578	4.405	3.911	4.054	3.41	4.237	3.928	4.03	3.821	4.385	3.015	3.917	3.533	4.03	4.248	3.67	3.939	3.64	4.012	2.915	3.389	2.925	4.103	2.765	3.233	2.421	3.147	2.824	3.181	2.624	2.301	2.286	2.734	2.15	2.902	2.581	2.288	2.883	2.487	2.426	3.024	4.095
357.52	4.102	3.945	2.68	3.608	3.118	4.357	2.468	3.572	4.41	3.914	4.052	3.414	4.235	3.934	4.034	3.83	4.386	3.019	3.929	3.542	4.027	4.252	3.678	3.94	3.64	4.01	2.919	3.399	2.932	4.107	2.774	3.241	2.425	3.153	2.831	3.198	2.638	2.309	2.298	2.746	2.156	2.908	2.596	2.288	2.883	2.489	2.434	3.031	4.099
357.97	4.105	3.935	2.685	3.606	3.115	4.359	2.468	3.567	4.413	3.914	4.05	3.415	4.225	3.937	4.037	3.835	4.386	3.019	3.929	3.542	4.03	4.251	3.668	3.94	3.635	3.994	2.912	3.408	2.921	4.105	2.775	3.23	2.424	3.148	2.827	3.186	2.635	2.306	2.299	2.743	2.163	2.907	2.599	2.285	2.878	2.481	2.431	3.035	4.096
358.41	4.103	3.945	2.688	3.613	3.124	4.382	2.473	3.57	4.414	3.919	4.051	3.412	4.229	3.947	4.042	3.844	4.393	3.02	3.93	3.543	4.041	4.257	3.672	3.945	3.645	3.992	2.911	3.407	2.915	4.112	2.773	3.234	2.428	3.157	2.833	3.186	2.636	2.312	2.305	2.746	2.164	2.913	2.603	2.298	2.882	2.481	2.443	3.041	4.101
358.86	4.107	3.946	2.69	3.614	3.117	4.401	2.47	3.577	4.408	3.923	4.051	3.411	4.224	3.949	4.051	3.843	4.388	3.02	3.931	3.542	4.041	4.269	3.677	3.94	3.65	3.99	2.904	3.403	2.929	4.108	2.786	3.245	2.43	3.175	2.841	3.198	2.652	2.322	2.318	2.755	2.176	2.924	2.612	2.309	2.89	2.495	2.46	3.059	4.114
359.31	4.105	3.949	2.693	3.607	3.103	4.412	2.465	3.573	4.408	3.921	4.045	3.411	4.229	3.943	4.051	3.85	4.39	3.022	3.928	3.54	4.047	4.271	3.671	3.936	3.647	3.983	2.9	3.395	2.927	4.103	2.792	3.238	2.427	3.173	2.845	3.195	2.66	2.325	2.325	2.757	2.179	2.927	2.617	2.311	2.894	2.502	2.459	3.055	4.121
359.75	4.114	3.95	2.692	3.607	3.104	4.43	2.473	3.568	4.407	3.916	4.047	3.408	4.227	3.947	4.059	3.852	4.397	3.014	3.936	3.536	4.055	4.271	3.672	3.94	3.652	3.988	2.902	3.396	2.926	4.107	2.793	3.241	2.426	3.182	2.85	3.195	2.668	2.327	2.327	2.76	2.192	2.932	2.624	2.312	2.897	2.515	2.465	3.07	4.13
360.2	4.119	3.949	2.687	3.602	3.097	4.445	2.475	3.573	4.41	3.903	4.052	3.405	4.228	3.956	4.052	3.843	4.402	3.012	3.938	3.534	4.049	4.272	3.677	3.935	3.652	3.994	2.908	3.389	2.921	4.109	2.807	3.254	2.421	3.185	2.85	3.21	2.679	2.343	2.329	2.744	2.198	2.919	2.618	2.324	2.902	2.518	2.458	3.069	4.137
360.64	4.123	3.944	2.689	3.6	3.097	4.481	2.471	3.589	4.415	3.913	4.056	3.403	4.226	3.952	4.059	3.854	4.404	3.011	3.94	3.535	4.064	4.281	3.681	3.944	3.658	3.996	2.907	3.39	2.927	4.118	2.809	3.258	2.412	3.185	2.842	3.204	2.684	2.335	2.332	2.736	2.195	2.914	2.618	2.322	2.904	2.515	2.447	3.063	4.143
361.09	4.12	3.948	2.694	3.605	3.091	4.506	2.464	3.591	4.414	3.915	4.061	3.395	4.23	3.944	4.055	3.864	4.404	3.009	3.944	3.533	4.066	4.277	3.687	3.938	3.659	3.999	2.918	3.393	2.925	4.12	2.802	3.263	2.409	3.198	2.852	3.206	2.68	2.333	2.325	2.738	2.2	2.909	2.625	2.322	2.91	2.51	2.445	3.067	4.15
361.53	4.125	3.942	2.687	3.608	3.093	4.541	2.475	3.597	4.428	3.918	4.064	3.405	4.237	3.955	4.061	3.869	4.405	3.013	3.944	3.533	4.084	4.286	3.698	3.944	3.673	4.001	2.92	3.398	2.932	4.123	2.802	3.265	2.405	3.202	2.852	3.202	2.679	2.333	2.332	2.732	2.191	2.914	2.628	2.315	2.911	2.508	2.452	3.065	4.146
361.98	4.137	3.953	2.69	3.605	3.098	4.571	2.48	3.599	4.435	3.916	4.066	3.404	4.242	3.963	4.074	3.884	4.404	3.028	3.941	3.532	4.088	4.297	3.709	3.938	3.674	3.995	2.925	3.399	2.943	4.128	2.805	3.28	2.412	3.208	2.863	3.219	2.691	2.334	2.332	2.74	2.201	2.921	2.627	2.313	2.916	2.517	2.458	3.067	4.151
362.42	4.147	3.964	2.689	3.61	3.1	4.604	2.483	3.598	4.428	3.924	4.076	3.404	4.251	3.972	4.076	3.892	4.414	3.025	3.944	3.524	4.103	4.303	3.723	3.943	3.682	4	2.924	3.404	2.939	4.133	2.804	3.273	2.41	3.205	2.863	3.215	2.697	2.334	2.332	2.733	2.2	2.921	2.63	2.313	2.908	2.508	2.453	3.066	4.163
362.87	4.166	3.977	2.698	3.616	3.107	4.641	2.502	3.609	4.43	3.946	4.088	3.415	4.257	3.976	4.082	3.905	4.428	3.03	3.951	3.524	4.11	4.308	3.727	3.949	3.686	4.012	2.93	3.414	2.945	4.137	2.81	3.276	2.416	3.219	2.866	3.215	2.714	2.344	2.332	2.738	2.209	2.925	2.636	2.323	2.913	2.517	2.458	3.076	4.182
363.31	4.172	3.983	2.692	3.607	3.107	4.673	2.508	3.614	4.432	3.951	4.095	3.414	4.267	3.975	4.083	3.916	4.43	3.029	3.949	3.532	4.114	4.313	3.731	3.948	3.691	4.018	2.926	3.418	2.946	4.137	2.809	3.28	2.417	3.23	2.87	3.221	2.722	2.348	2.343	2.737	2.217	2.928	2.639	2.325	2.917	2.522	2.457	3.082	4.184
363.76	4.187	3.987	2.697	3.609	3.111	4.716	2.516	3.617	4.429	3.962	4.112	3.413	4.274	3.982	4.087	3.922	4.447	3.036	3.951	3.535	4.128	4.321	3.742	3.948	3.696	4.03	2.931	3.424	2.955	4.137	2.813	3.281	2.411	3.24	2.873	3.221	2.726	2.351	2.343	2.744	2.224	2.934	2.642	2.336	2.912	2.519	2.462	3.082	4.191
364.2	4.196	4.002	2.705	3.617	3.114	4.752	2.515	3.618	4.439	3.973	4.129	3.424	4.283	3.99	4.091	3.925	4.46	3.042	3.957	3.534	4.13	4.324	3.757	3.948	3.701	4.037	2.935	3.425	2.961	4.144	2.819	3.283	2.422	3.246	2.879	3.229	2.735	2.356	2.345	2.742	2.224	2.942	2.654	2.326	2.914	2.528	2.459	3.079	4.197
364.65	4.207	4.018	2.706	3.626	3.118	4.803	2.52	3.614	4.448	3.986	4.138	3.437	4.286	3.991	4.091	3.938	4.478	3.051	3.972	3.538	4.142	4.329	3.765	3.944	3.706	4.046	2.946	3.431	2.968	4.151	2.829	3.285	2.427	3.252	2.878	3.254	2.748	2.369	2.342	2.751	2.229	2.952	2.656	2.325	2.917	2.529	2.465	3.089	4.209
365.09	4.205	4.017	2.712	3.626	3.125	4.856	2.521	3.622	4.456	3.997	4.153	3.432	4.284	4.006	4.092	3.948	4.486	3.055	3.965	3.534	4.149	4.334	3.77	3.94	3.701	4.042	2.949	3.438	2.981	4.161	2.841	3.295	2.433	3.268	2.892	3.264	2.756	2.373	2.351	2.762	2.234	2.962	2.663	2.332	2.923	2.536	2.474	3.092	4.223
365.54	4.211	4.021	2.71	3.624	3.117	4.91	2.524	3.635	4.463	4.013	4.155	3.436	4.283	4.018	4.103	3.954	4.497	3.05	3.965	3.526	4.152	4.332	3.768	3.942	3.708	4.055	2.955	3.443	2.99	4.16	2.852	3.295	2.434	3.268	2.896	3.27	2.765	2.377	2.35	2.766	2.241	2.967	2.66	2.332	2.926	2.533	2.467	3.093	4.229
365.98	4.225	4.029	2.713	3.631	3.118	4.967	2.527	3.643	4.463	4.025	4.167	3.438	4.286	4.019	4.107	3.959	4.513	3.05	3.962	3.517	4.157	4.336	3.777	3.942	3.72	4.062	2.955	3.439	2.993	4.163	2.858	3.296	2.431	3.284	2.889	3.281	2.778	2.375	2.339	2.768	2.242	2.962	2.661	2.341	2.924	2.53	2.464	3.088	4.242
366.43	4.24	4.034	2.712	3.638	3.123	5.031	2.531	3.65	4.467	4.026	4.175	3.442	4.289	4.025	4.108	3.963	4.515	3.06	3.967	3.519	4.17	4.335	3.788	3.939	3.725	4.072	2.957	3.439	3.006	4.171	2.857	3.308	2.431	3.298	2.898	3.296	2.795	2.384	2.339	2.78	2.245	2.964	2.664	2.34	2.932	2.531	2.466	3.098	4.261
366.87	4.258	4.031	2.715	3.627	3.115	5.088	2.524	3.647	4.461	4.031	4.177	3.435	4.289	4.023	4.101	3.965	4.515	3.058	3.966	3.512	4.174	4.333	3.792	3.935	3.723	4.069	2.961	3.444	3.002	4.165	2.852	3.309	2.428	3.297	2.897	3.294	2.808	2.385	2.335	2.775	2.249	2.967	2.661	2.326	2.928	2.525	2.449	3.099	4.27
367.32	4.288	4.049	2.729	3.637	3.121	5.16	2.536	3.649	4.471	4.05	4.195	3.44	4.298	4.04	4.105	3.976	4.538	3.057	3.971	3.522	4.187	4.336	3.813	3.948	3.727	4.075	2.979	3.465	3.01	4.176	2.847	3.301	2.431	3.3	2.902	3.293	2.818	2.377	2.331	2.78	2.246	2.965	2.663	2.323	2.926	2.514	2.436	3.087	4.273
367.76	4.311	4.055	2.732	3.645	3.127	5.234	2.552	3.66	4.478	4.059	4.201	3.446	4.303	4.043	4.113	3.993	4.551	3.069	3.979	3.522	4.192	4.333	3.827	3.955	3.738	4.09	2.986	3.473	3.026	4.187	2.85	3.309	2.435	3.32	2.916	3.31	2.839	2.386	2.323	2.798	2.255	2.983	2.667	2.325	2.927	2.513	2.442	3.103	4.293
368.21	4.327	4.067	2.737	3.642	3.124	5.307	2.555	3.665	4.485	4.077	4.209	3.444	4.312	4.055	4.121	4.001	4.562	3.081	3.974	3.532	4.2	4.334	3.844	3.95	3.735	4.09	2.986	3.481	3.031	4.192	2.853	3.309	2.433	3.327	2.926	3.332	2.86	2.395	2.326	2.806	2.261	2.993	2.662	2.327	2.929	2.508	2.441	3.11	4.303
368.65	4.343	4.077	2.74	3.645	3.126	5.39	2.563	3.671	4.49	4.088	4.213	3.447	4.3	4.054	4.12	4.013	4.56	3.084	3.975	3.531	4.207	4.336	3.85	3.947	3.737	4.077	2.98	3.489	3.036	4.197	2.85	3.319	2.44	3.334	2.939	3.341	2.886	2.394	2.325	2.825	2.262	3.011	2.673	2.323	2.928	2.506	2.447	3.119	4.322
369.1	4.366	4.097	2.745	3.653	3.126	5.461	2.577	3.678	4.493	4.087	4.225	3.446	4.304	4.069	4.12	4.022	4.571	3.085	3.974	3.536	4.21	4.338	3.864	3.95	3.74	4.079	2.979	3.495	3.042	4.192	2.855	3.328	2.445	3.355	2.958	3.367	2.924	2.416	2.32	2.848	2.27	3.033	2.684	2.323	2.935	2.513	2.456	3.133	4.348
369.54	4.392	4.117	2.744	3.657	3.13	5.546	2.597	3.693	4.505	4.101	4.237	3.458	4.302	4.082	4.132	4.032	4.587	3.084	3.98	3.535	4.217	4.345	3.871	3.962	3.749	4.09	2.985	3.508	3.052	4.196	2.868	3.334	2.445	3.373	2.967	3.393	2.966	2.426	2.322	2.86	2.277	3.054	2.69	2.326	2.934	2.517	2.454	3.145	4.377
369.98	4.422	4.14	2.75	3.658	3.127	5.633	2.602	3.693	4.51	4.12	4.249	3.465	4.301	4.086	4.141	4.045	4.608	3.088	3.987	3.542	4.221	4.345	3.882	3.963	3.755	4.098	2.995	3.512	3.059	4.208	2.883	3.347	2.457	3.391	2.983	3.427	3.01	2.436	2.327	2.884	2.297	3.073	2.698	2.336	2.941	2.527	2.458	3.157	4.414
370.43	4.448	4.157	2.752	3.668	3.127	5.735	2.616	3.701	4.523	4.146	4.271	3.477	4.296	4.095	4.145	4.056	4.628	3.087	3.998	3.558	4.241	4.344	3.898	3.969	3.765	4.106	3.002	3.522	3.066	4.216	2.898	3.349	2.459	3.413	2.987	3.45	3.051	2.455	2.334	2.903	2.3	3.092	2.711	2.346	2.947	2.523	2.465	3.165	4.446
370.87	4.475	4.172	2.753	3.671	3.134	5.841	2.626	3.711	4.535	4.161	4.277	3.48	4.295	4.097	4.146	4.068	4.636	3.087	3.997	3.566	4.248	4.356	3.908	3.965	3.771	4.107	3.013	3.529	3.072	4.224	2.904	3.357	2.455	3.43	3.009	3.486	3.092	2.468	2.328	2.925	2.311	3.114	2.713	2.344	2.953	2.521	2.464	3.178	4.479
371.32	4.499	4.198	2.756	3.676	3.143	5.95	2.636	3.721	4.544	4.172	4.287	3.476	4.298	4.107	4.146	4.084	4.645	3.085	3.994	3.571	4.262	4.366	3.927	3.964	3.784	4.105	3.013	3.535	3.076	4.231	2.908	3.366	2.46	3.446	3.025	3.523	3.139	2.472	2.331	2.939	2.319	3.136	2.713	2.341	2.958	2.519	2.462	3.183	4.504
371.76	4.53	4.231	2.77	3.7	3.157	6.073	2.66	3.739	4.564	4.202	4.31	3.485	4.312	4.119	4.154	4.108	4.67	3.092	4.003	3.58	4.276	4.386	3.941	3.969	3.797	4.123	3.025	3.549	3.089	4.244	2.921	3.378	2.46	3.46	3.043	3.552	3.189	2.48	2.332	2.955	2.322	3.166	2.714	2.343	2.964	2.505	2.46	3.189	4.53
372.21	4.567	4.262	2.776	3.718	3.17	6.194	2.681	3.755	4.583	4.215	4.317	3.492	4.313	4.121	4.164	4.137	4.686	3.095	4.01	3.585	4.28	4.391	3.952	3.975	3.814	4.123	3.031	3.563	3.098	4.254	2.938	3.396	2.466	3.482	3.07	3.595	3.263	2.491	2.344	2.982	2.332	3.202	2.722	2.346	2.982	2.503	2.457	3.205	4.567
372.65	4.602	4.289	2.783	3.721	3.185	6.332	2.708	3.768	4.591	4.238	4.324	3.502	4.316	4.133	4.17	4.17	4.709	3.104	4.015	3.592	4.296	4.401	3.968	3.98	3.825	4.136	3.045	3.581	3.115	4.265	2.948	3.417	2.475	3.512	3.101	3.646	3.344	2.515	2.355	3.015	2.35	3.237	2.725	2.362	2.999	2.505	2.469	3.23	4.605
373.1	4.64	4.318	2.789	3.738	3.189	6.465	2.745	3.794	4.597	4.262	4.337	3.511	4.318	4.144	4.184	4.191	4.722	3.105	4.019	3.597	4.301	4.416	3.984	3.995	3.836	4.149	3.051	3.607	3.13	4.266	2.959	3.433	2.472	3.545	3.132	3.682	3.42	2.525	2.367	3.039	2.366	3.284	2.731	2.372	3.016	2.502	2.468	3.237	4.647
373.54	4.683	4.359	2.788	3.745	3.199	6.6	2.776	3.813	4.604	4.294	4.357	3.522	4.323	4.147	4.189	4.223	4.738	3.105	4.033	3.608	4.312	4.423	3.995	3.999	3.857	4.168	3.06	3.632	3.143	4.276	2.961	3.445	2.466	3.566	3.148	3.728	3.504	2.536	2.37	3.067	2.371	3.326	2.726	2.373	3.027	2.49	2.467	3.241	4.679
373.98	4.727	4.403	2.8	3.762	3.213	6.755	2.807	3.838	4.607	4.329	4.392	3.532	4.33	4.158	4.196	4.259	4.766	3.11	4.042	3.62	4.333	4.443	4.013	4.003	3.875	4.173	3.065	3.655	3.152	4.291	2.978	3.463	2.472	3.601	3.18	3.779	3.588	2.554	2.382	3.108	2.372	3.378	2.732	2.381	3.04	2.489	2.468	3.256	4.724
374.43	4.77	4.454	2.815	3.78	3.233	6.92	2.84	3.861	4.629	4.359	4.419	3.545	4.337	4.168	4.204	4.303	4.787	3.124	4.048	3.634	4.359	4.465	4.031	4.009	3.894	4.178	3.073	3.69	3.172	4.307	2.983	3.487	2.475	3.624	3.226	3.835	3.682	2.566	2.402	3.138	2.389	3.436	2.736	2.383	3.062	2.491	2.463	3.269	4.76
374.87	4.812	4.519	2.815	3.8	3.253	7.083	2.876	3.892	4.639	4.398	4.439	3.552	4.34	4.177	4.212	4.345	4.813	3.123	4.054	3.64	4.36	4.488	4.05	4.014	3.922	4.182	3.083	3.717	3.187	4.317	3.001	3.506	2.481	3.652	3.262	3.904	3.797	2.575	2.416	3.18	2.404	3.494	2.74	2.394	3.084	2.495	2.462	3.276	4.799
375.32	4.86	4.586	2.835	3.834	3.281	7.269	2.923	3.933	4.663	4.441	4.471	3.575	4.345	4.203	4.241	4.397	4.859	3.139	4.071	3.659	4.384	4.519	4.067	4.027	3.955	4.207	3.099	3.757	3.227	4.342	3.036	3.537	2.489	3.696	3.302	3.98	3.924	2.597	2.44	3.239	2.426	3.563	2.753	2.411	3.115	2.498	2.474	3.292	4.85
375.76	4.9	4.644	2.845	3.851	3.303	7.454	2.963	3.976	4.68	4.477	4.501	3.591	4.341	4.209	4.253	4.454	4.891	3.149	4.082	3.671	4.394	4.549	4.083	4.035	3.98	4.226	3.106	3.795	3.246	4.361	3.058	3.574	2.489	3.729	3.343	4.052	4.059	2.612	2.452	3.293	2.443	3.627	2.755	2.414	3.14	2.496	2.476	3.301	4.898
376.2	4.949	4.711	2.864	3.878	3.328	7.654	3.012	4.012	4.695	4.528	4.533	3.604	4.341	4.224	4.271	4.498	4.925	3.144	4.091	3.689	4.423	4.58	4.103	4.043	3.996	4.24	3.117	3.838	3.267	4.376	3.082	3.618	2.491	3.767	3.393	4.146	4.196	2.634	2.479	3.346	2.46	3.695	2.758	2.434	3.173	2.491	2.483	3.312	4.938
376.65	5.005	4.781	2.876	3.908	3.358	7.868	3.064	4.064	4.717	4.581	4.564	3.616	4.342	4.234	4.284	4.558	4.958	3.145	4.103	3.704	4.441	4.61	4.118	4.051	4.019	4.258	3.141	3.886	3.294	4.405	3.104	3.662	2.505	3.812	3.452	4.238	4.35	2.659	2.508	3.41	2.478	3.776	2.769	2.454	3.221	2.492	2.49	3.32	4.984
377.09	5.062	4.864	2.891	3.945	3.387	8.088	3.113	4.111	4.736	4.648	4.601	3.637	4.353	4.255	4.31	4.629	5	3.153	4.114	3.725	4.457	4.651	4.144	4.062	4.05	4.293	3.164	3.938	3.329	4.428	3.14	3.705	2.518	3.874	3.513	4.346	4.513	2.692	2.542	3.478	2.504	3.874	2.779	2.476	3.271	2.492	2.496	3.334	5.033
377.54	5.13	4.945	2.91	3.978	3.415	8.331	3.168	4.154	4.761	4.72	4.642	3.66	4.356	4.268	4.339	4.704	5.048	3.172	4.137	3.745	4.471	4.689	4.167	4.069	4.071	4.33	3.184	3.998	3.37	4.469	3.176	3.753	2.537	3.918	3.578	4.453	4.701	2.72	2.577	3.546	2.531	3.971	2.79	2.5	3.316	2.496	2.507	3.341	5.079
377.98	5.193	5.037	2.928	4.015	3.452	8.59	3.225	4.203	4.783	4.791	4.677	3.673	4.366	4.29	4.366	4.779	5.094	3.184	4.159	3.766	4.484	4.727	4.192	4.071	4.092	4.351	3.198	4.061	3.405	4.506	3.219	3.807	2.551	3.973	3.64	4.574	4.891	2.75	2.612	3.631	2.558	4.076	2.796	2.523	3.372	2.495	2.524	3.357	5.121
378.42	5.243	5.128	2.941	4.051	3.485	8.851	3.284	4.265	4.799	4.858	4.708	3.68	4.369	4.306	4.38	4.856	5.144	3.187	4.173	3.78	4.502	4.777	4.217	4.07	4.114	4.369	3.213	4.131	3.439	4.535	3.261	3.864	2.555	4.024	3.71	4.697	5.093	2.78	2.638	3.719	2.585	4.192	2.807	2.541	3.432	2.49	2.525	3.366	5.155
378.87	5.313	5.228	2.965	4.094	3.524	9.128	3.353	4.331	4.81	4.936	4.746	3.691	4.382	4.326	4.41	4.949	5.2	3.201	4.187	3.797	4.526	4.839	4.241	4.09	4.14	4.394	3.227	4.218	3.483	4.572	3.304	3.934	2.569	4.08	3.798	4.833	5.317	2.821	2.677	3.82	2.614	4.318	2.814	2.567	3.496	2.493	2.529	3.388	5.207
379.31	5.375	5.331	2.986	4.134	3.558	9.392	3.424	4.391	4.827	5.009	4.791	3.717	4.381	4.346	4.441	5.038	5.249	3.221	4.21	3.816	4.538	4.882	4.265	4.097	4.158	4.431	3.253	4.294	3.534	4.603	3.359	4.007	2.59	4.154	3.887	4.982	5.563	2.869	2.722	3.925	2.651	4.461	2.827	2.607	3.575	2.502	2.544	3.406	5.259
379.75	5.453	5.435	3.008	4.182	3.6	9.672	3.494	4.464	4.845	5.096	4.846	3.743	4.377	4.361	4.473	5.132	5.313	3.235	4.233	3.84	4.559	4.942	4.281	4.106	4.181	4.472	3.279	4.379	3.591	4.651	3.419	4.09	2.607	4.231	3.994	5.135	5.815	2.922	2.774	4.046	2.688	4.618	2.846	2.647	3.653	2.497	2.558	3.422	5.317
380.2	5.541	5.562	3.037	4.225	3.647	9.956	3.577	4.544	4.858	5.203	4.891	3.772	4.38	4.383	4.509	5.23	5.372	3.247	4.264	3.875	4.58	5.003	4.308	4.121	4.206	4.506	3.315	4.485	3.644	4.699	3.491	4.181	2.637	4.306	4.104	5.314	6.096	2.979	2.836	4.181	2.743	4.773	2.872	2.695	3.745	2.515	2.582	3.448	5.383
380.64	5.617	5.695	3.06	4.281	3.697	10.261	3.664	4.624	4.87	5.33	4.951	3.801	4.386	4.423	4.55	5.341	5.448	3.265	4.294	3.903	4.612	5.075	4.337	4.13	4.231	4.556	3.352	4.595	3.71	4.762	3.556	4.269	2.665	4.388	4.215	5.489	6.378	3.037	2.898	4.314	2.798	4.939	2.893	2.74	3.835	2.528	2.603	3.462	5.439
381.09	5.702	5.845	3.094	4.35	3.756	10.591	3.755	4.721	4.89	5.463	5.015	3.836	4.4	4.446	4.597	5.47	5.525	3.281	4.337	3.949	4.645	5.159	4.367	4.14	4.262	4.608	3.381	4.727	3.776	4.819	3.627	4.378	2.682	4.471	4.328	5.677	6.671	3.087	2.963	4.456	2.849	5.121	2.908	2.781	3.937	2.529	2.623	3.479	5.498
381.53	5.804	6.008	3.137	4.418	3.825	10.936	3.856	4.829	4.924	5.608	5.086	3.867	4.413	4.48	4.645	5.62	5.617	3.305	4.371	3.997	4.685	5.249	4.398	4.15	4.314	4.68	3.426	4.859	3.852	4.893	3.705	4.488	2.71	4.557	4.456	5.879	6.986	3.152	3.027	4.618	2.91	5.293	2.925	2.827	4.041	2.532	2.639	3.506	5.559
381.97	5.904	6.183	3.178	4.497	3.883	11.285	3.97	4.936	4.953	5.767	5.152	3.899	4.429	4.523	4.7	5.759	5.713	3.332	4.398	4.038	4.71	5.345	4.438	4.165	4.352	4.749	3.462	4.996	3.931	4.956	3.803	4.62	2.751	4.674	4.598	6.112	7.337	3.235	3.12	4.803	2.983	5.501	2.961	2.888	4.161	2.548	2.667	3.542	5.636
382.42	6.015	6.364	3.219	4.587	3.961	11.647	4.099	5.044	4.994	5.928	5.219	3.937	4.441	4.564	4.759	5.915	5.816	3.357	4.443	4.097	4.746	5.462	4.479	4.18	4.388	4.83	3.517	5.155	4.031	5.031	3.894	4.764	2.783	4.778	4.743	6.361	7.703	3.317	3.204	4.982	3.07	5.72	2.99	2.943	4.294	2.562	2.7	3.573	5.725
382.86	6.12	6.543	3.255	4.667	4.034	12.002	4.219	5.175	5.015	6.082	5.29	3.97	4.44	4.61	4.823	6.07	5.924	3.373	4.487	4.147	4.774	5.566	4.517	4.197	4.426	4.909	3.571	5.324	4.119	5.111	4.006	4.908	2.83	4.891	4.895	6.61	8.088	3.413	3.301	5.192	3.158	5.96	3.026	3.019	4.436	2.584	2.742	3.608	5.817
383.3	6.236	6.723	3.308	4.757	4.108	12.37	4.343	5.293	5.048	6.251	5.371	4.002	4.445	4.655	4.89	6.243	6.042	3.398	4.534	4.203	4.806	5.686	4.555	4.203	4.455	4.999	3.62	5.496	4.211	5.199	4.107	5.07	2.872	5.006	5.055	6.864	8.468	3.517	3.396	5.393	3.236	6.194	3.058	3.088	4.583	2.593	2.78	3.646	5.899
383.75	6.362	6.923	3.354	4.848	4.186	12.72	4.467	5.421	5.081	6.434	5.464	4.047	4.465	4.696	4.954	6.422	6.158	3.422	4.583	4.265	4.832	5.805	4.609	4.223	4.497	5.083	3.669	5.675	4.298	5.292	4.222	5.233	2.923	5.13	5.228	7.133	8.86	3.622	3.498	5.605	3.332	6.429	3.094	3.17	4.74	2.614	2.818	3.687	6
384.19	6.498	7.135	3.406	4.958	4.275	13.102	4.608	5.549	5.113	6.629	5.55	4.089	4.492	4.747	5.024	6.611	6.278	3.456	4.637	4.336	4.881	5.935	4.659	4.24	4.552	5.181	3.722	5.871	4.405	5.395	4.342	5.402	2.978	5.263	5.403	7.422	9.258	3.738	3.617	5.83	3.428	6.692	3.131	3.259	4.907	2.628	2.859	3.728	6.101
384.63	6.624	7.359	3.457	5.078	4.381	13.473	4.749	5.695	5.163	6.836	5.641	4.145	4.511	4.808	5.101	6.803	6.41	3.493	4.694	4.411	4.922	6.084	4.709	4.258	4.612	5.289	3.79	6.087	4.516	5.509	4.469	5.577	3.047	5.409	5.591	7.71	9.687	3.844	3.743	6.063	3.527	6.968	3.176	3.344	5.086	2.65	2.897	3.765	6.211
385.08	6.764	7.597	3.519	5.211	4.487	13.872	4.898	5.84	5.198	7.05	5.748	4.209	4.539	4.871	5.183	7.017	6.552	3.539	4.756	4.49	4.965	6.243	4.764	4.285	4.67	5.404	3.851	6.304	4.642	5.628	4.605	5.774	3.109	5.548	5.773	8.006	10.134	3.965	3.867	6.313	3.653	7.266	3.218	3.444	5.267	2.668	2.949	3.824	6.334
385.52	6.915	7.837	3.583	5.349	4.595	14.268	5.061	6.001	5.241	7.285	5.867	4.262	4.562	4.937	5.281	7.241	6.701	3.577	4.835	4.584	5.013	6.406	4.826	4.308	4.73	5.522	3.919	6.532	4.76	5.754	4.756	5.974	3.17	5.69	5.982	8.329	10.585	4.09	4.013	6.588	3.776	7.569	3.267	3.542	5.46	2.698	3.005	3.875	6.466
385.96	7.058	8.102	3.641	5.495	4.716	14.68	5.23	6.177	5.276	7.533	5.984	4.321	4.579	5.015	5.376	7.465	6.856	3.614	4.905	4.672	5.055	6.593	4.884	4.339	4.796	5.642	3.997	6.773	4.882	5.893	4.909	6.189	3.238	5.843	6.194	8.678	11.045	4.226	4.167	6.881	3.906	7.883	3.315	3.652	5.66	2.721	3.061	3.933	6.601
386.41	7.213	8.37	3.713	5.654	4.839	15.092	5.406	6.353	5.325	7.797	6.102	4.389	4.595	5.1	5.48	7.712	7.016	3.659	4.986	4.775	5.11	6.785	4.945	4.366	4.86	5.782	4.083	7.034	5.017	6.041	5.066	6.434	3.319	6.001	6.437	9.038	11.525	4.372	4.337	7.184	4.043	8.198	3.378	3.774	5.886	2.757	3.126	4.006	6.741
386.85	7.387	8.654	3.792	5.82	4.974	15.517	5.588	6.539	5.38	8.069	6.234	4.463	4.618	5.188	5.588	7.966	7.174	3.706	5.082	4.894	5.169	6.987	5.013	4.403	4.928	5.939	4.174	7.307	5.162	6.199	5.233	6.695	3.407	6.17	6.688	9.418	12.041	4.536	4.522	7.501	4.192	8.542	3.434	3.904	6.128	2.796	3.203	4.081	6.9
387.29	7.562	8.945	3.872	5.998	5.116	15.937	5.782	6.745	5.44	8.346	6.361	4.552	4.637	5.279	5.705	8.225	7.355	3.757	5.176	5.01	5.22	7.19	5.074	4.419	5.007	6.101	4.272	7.598	5.318	6.369	5.409	6.959	3.509	6.347	6.94	9.803	12.552	4.684	4.718	7.83	4.344	8.898	3.502	4.038	6.376	2.836	3.276	4.143	7.045
387.74	7.752	9.255	3.965	6.204	5.271	16.399	5.997	6.972	5.51	8.657	6.505	4.636	4.672	5.391	5.828	8.509	7.561	3.811	5.284	5.146	5.289	7.422	5.156	4.463	5.105	6.281	4.373	7.927	5.484	6.554	5.612	7.24	3.618	6.535	7.215	10.204	13.084	4.854	4.939	8.171	4.512	9.262	3.583	4.184	6.64	2.891	3.361	4.228	7.215
388.18	7.932	9.57	4.054	6.4	5.424	16.849	6.219	7.189	5.572	8.968	6.63	4.73	4.698	5.503	5.961	8.797	7.751	3.861	5.392	5.288	5.349	7.653	5.246	4.507	5.194	6.471	4.48	8.262	5.646	6.742	5.813	7.525	3.726	6.73	7.499	10.636	13.63	5.039	5.165	8.535	4.688	9.641	3.672	4.346	6.922	2.954	3.463	4.326	7.39
388.62	8.111	9.882	4.134	6.602	5.594	17.285	6.428	7.403	5.637	9.271	6.777	4.817	4.726	5.619	6.102	9.087	7.95	3.917	5.502	5.426	5.417	7.895	5.327	4.545	5.291	6.667	4.589	8.579	5.815	6.93	6.011	7.818	3.847	6.929	7.792	11.067	14.19	5.224	5.398	8.914	4.87	10.028	3.751	4.5	7.217	3.007	3.56	4.421	7.571
389.06	8.307	10.207	4.236	6.819	5.759	17.732	6.646	7.631	5.721	9.585	6.931	4.928	4.758	5.737	6.246	9.381	8.152	3.979	5.62	5.585	5.478	8.157	5.412	4.594	5.409	6.872	4.705	8.912	5.991	7.138	6.218	8.136	3.966	7.128	8.093	11.503	14.743	5.42	5.634	9.289	5.043	10.427	3.84	4.66	7.523	3.058	3.664	4.528	7.769
389.51	8.512	10.533	4.328	7.046	5.931	18.163	6.868	7.863	5.804	9.9	7.097	5.031	4.781	5.86	6.402	9.69	8.368	4.05	5.743	5.742	5.548	8.422	5.502	4.649	5.52	7.092	4.823	9.268	6.159	7.364	6.421	8.439	4.096	7.331	8.4	11.964	15.306	5.619	5.879	9.675	5.237	10.828	3.925	4.836	7.825	3.129	3.762	4.631	7.971
389.95	8.711	10.869	4.426	7.285	6.115	18.597	7.092	8.103	5.884	10.24	7.265	5.142	4.816	5.994	6.569	9.995	8.583	4.122	5.877	5.909	5.623	8.705	5.601	4.708	5.623	7.308	4.941	9.643	6.334	7.589	6.652	8.786	4.243	7.557	8.731	12.451	15.878	5.838	6.155	10.077	5.451	11.265	4.027	5.03	8.156	3.218	3.899	4.742	8.198
390.39	8.915	11.221	4.532	7.538	6.323	19.063	7.323	8.355	5.972	10.592	7.443	5.268	4.85	6.135	6.723	10.32	8.812	4.188	6.028	6.093	5.704	8.994	5.705	4.767	5.749	7.54	5.08	10.033	6.523	7.832	6.872	9.127	4.393	7.767	9.063	12.946	16.456	6.058	6.437	10.482	5.671	11.693	4.124	5.228	8.491	3.293	4.024	4.864	8.435
390.84	9.131	11.582	4.646	7.805	6.523	19.537	7.56	8.62	6.061	10.959	7.627	5.396	4.886	6.286	6.901	10.646	9.041	4.274	6.175	6.277	5.783	9.294	5.817	4.83	5.891	7.783	5.217	10.448	6.707	8.093	7.119	9.489	4.557	8.001	9.414	13.461	17.064	6.293	6.729	10.917	5.899	12.149	4.233	5.449	8.859	3.394	4.163	4.991	8.688
391.28	9.353	11.953	4.762	8.091	6.727	20.006	7.823	8.871	6.166	11.36	7.829	5.535	4.939	6.447	7.081	10.998	9.272	4.358	6.337	6.482	5.875	9.623	5.928	4.901	6.031	8.06	5.37	10.88	6.918	8.361	7.377	9.861	4.721	8.232	9.782	13.981	17.68	6.523	7.041	11.354	6.125	12.617	4.347	5.657	9.213	3.489	4.301	5.123	8.943
391.72	9.582	12.344	4.887	8.384	6.953	20.487	8.096	9.148	6.267	11.76	8.03	5.689	4.991	6.622	7.282	11.347	9.513	4.458	6.52	6.696	5.98	9.958	6.06	4.989	6.192	8.354	5.535	11.32	7.151	8.645	7.654	10.256	4.902	8.484	10.158	14.518	18.3	6.764	7.363	11.817	6.377	13.104	4.483	5.889	9.594	3.613	4.473	5.27	9.227
392.16	9.811	12.724	5.013	8.681	7.178	20.959	8.368	9.421	6.371	12.154	8.232	5.84	5.028	6.795	7.486	11.7	9.761	4.556	6.699	6.922	6.083	10.31	6.18	5.065	6.35	8.643	5.702	11.759	7.373	8.924	7.918	10.654	5.085	8.717	10.531	15.046	18.898	7.007	7.695	12.278	6.623	13.586	4.626	6.127	9.972	3.736	4.636	5.424	9.492
392.61	10.041	13.103	5.126	8.984	7.4	21.415	8.628	9.702	6.487	12.559	8.436	6.002	5.068	6.981	7.702	12.057	10.017	4.654	6.881	7.148	6.173	10.668	6.308	5.148	6.487	8.94	5.879	12.195	7.589	9.218	8.189	11.07	5.276	8.966	10.929	15.58	19.545	7.262	8.036	12.758	6.883	14.083	4.768	6.362	10.366	3.865	4.805	5.586	9.777
393.05	10.275	13.487	5.258	9.29	7.627	21.886	8.889	9.974	6.6	12.968	8.66	6.159	5.118	7.166	7.901	12.423	10.27	4.759	7.077	7.363	6.27	11.025	6.44	5.239	6.635	9.237	6.046	12.654	7.815	9.518	8.459	11.494	5.464	9.227	11.323	16.136	20.149	7.527	8.389	13.242	7.147	14.582	4.906	6.613	10.762	4.01	4.989	5.76	10.067
393.49	10.525	13.882	5.383	9.612	7.876	22.341	9.169	10.267	6.725	13.392	8.879	6.329	5.16	7.363	8.131	12.795	10.537	4.872	7.292	7.607	6.376	11.408	6.577	5.334	6.796	9.552	6.23	13.139	8.035	9.838	8.745	11.923	5.673	9.499	11.748	16.719	20.775	7.797	8.762	13.747	7.407	15.082	5.058	6.865	11.176	4.164	5.181	5.938	10.373
393.93	10.779	14.284	5.526	9.953	8.124	22.82	9.45	10.574	6.861	13.827	9.091	6.518	5.221	7.57	8.356	13.17	10.807	4.994	7.505	7.872	6.494	11.804	6.721	5.442	6.965	9.908	6.422	13.638	8.271	10.184	9.032	12.357	5.899	9.772	12.169	17.299	21.399	8.08	9.139	14.262	7.689	15.603	5.228	7.13	11.607	4.335	5.398	6.139	10.679
394.38	11.046	14.697	5.673	10.322	8.392	23.289	9.743	10.881	7.013	14.282	9.324	6.728	5.291	7.796	8.603	13.577	11.08	5.131	7.751	8.154	6.633	12.219	6.88	5.561	7.165	10.274	6.618	14.159	8.518	10.53	9.348	12.827	6.135	10.071	12.619	17.905	22.048	8.38	9.551	14.796	7.987	16.149	5.404	7.421	12.063	4.519	5.625	6.361	11.011
394.82	11.318	15.121	5.825	10.7	8.676	23.777	10.047	11.202	7.166	14.745	9.58	6.942	5.365	8.028	8.87	13.996	11.37	5.276	7.993	8.446	6.776	12.654	7.04	5.701	7.371	10.66	6.827	14.709	8.768	10.893	9.673	13.287	6.373	10.376	13.075	18.511	22.708	8.683	9.98	15.323	8.308	16.725	5.585	7.707	12.525	4.711	5.861	6.574	11.354
395.26	11.579	15.552	5.987	11.1	8.962	24.257	10.361	11.532	7.319	15.231	9.843	7.166	5.436	8.279	9.146	14.426	11.675	5.425	8.237	8.757	6.916	13.1	7.191	5.836	7.584	11.055	7.043	15.263	9.033	11.277	9.999	13.775	6.63	10.693	13.554	19.129	23.379	8.997	10.421	15.885	8.619	17.301	5.784	8.023	13.005	4.92	6.112	6.807	11.722
395.7	11.851	15.998	6.145	11.522	9.27	24.751	10.676	11.849	7.49	15.736	10.124	7.397	5.518	8.546	9.429	14.869	11.984	5.585	8.52	9.093	7.066	13.574	7.374	6.001	7.801	11.485	7.265	15.823	9.307	11.673	10.339	14.28	6.875	11.007	14.057	19.782	24.071	9.33	10.875	16.451	8.968	17.889	5.988	8.35	13.512	5.142	6.396	7.075	12.115
396.15	12.115	16.442	6.298	11.938	9.571	25.241	10.979	12.18	7.659	16.234	10.42	7.636	5.6	8.813	9.731	15.299	12.281	5.744	8.798	9.412	7.219	14.068	7.556	6.154	8.005	11.912	7.495	16.395	9.571	12.075	10.679	14.8	7.159	11.323	14.547	20.437	24.746	9.667	11.336	17.047	9.318	18.494	6.192	8.686	14.014	5.373	6.687	7.334	12.516
396.59	12.408	16.895	6.461	12.377	9.883	25.719	11.283	12.502	7.843	16.745	10.713	7.879	5.691	9.098	10.033	15.728	12.592	5.918	9.095	9.748	7.383	14.565	7.727	6.321	8.227	12.346	7.728	16.97	9.85	12.482	11.004	15.319	7.436	11.63	15.032	21.071	25.403	10	11.793	17.623	9.662	19.079	6.388	9.011	14.498	5.619	6.965	7.602	12.923
397.03	12.688	17.351	6.642	12.829	10.187	26.21	11.605	12.84	8.031	17.269	11.008	8.136	5.77	9.388	10.34	16.179	12.903	6.096	9.404	10.103	7.544	15.066	7.926	6.493	8.455	12.801	7.954	17.578	10.127	12.913	11.325	15.837	7.714	11.948	15.522	21.708	26.032	10.331	12.254	18.193	10.005	19.679	6.604	9.335	14.967	5.876	7.263	7.867	13.34
397.47	12.974	17.809	6.811	13.279	10.508	26.668	11.921	13.178	8.225	17.796	11.3	8.388	5.86	9.672	10.64	16.62	13.228	6.273	9.723	10.461	7.717	15.574	8.115	6.678	8.678	13.269	8.201	18.184	10.408	13.342	11.668	16.376	8.015	12.285	16.03	22.36	26.676	10.679	12.737	18.779	10.365	20.28	6.828	9.689	15.473	6.163	7.584	8.157	13.773
397.92	13.259	18.273	6.991	13.741	10.829	27.143	12.242	13.52	8.422	18.328	11.592	8.65	5.952	9.99	10.95	17.048	13.529	6.458	10.05	10.826	7.889	16.087	8.311	6.86	8.913	13.743	8.452	18.784	10.679	13.769	12.027	16.946	8.317	12.614	16.565	23.009	27.32	11.035	13.227	19.355	10.724	20.891	7.077	10.048	15.984	6.443	7.931	8.474	14.21
398.36	13.537	18.721	7.167	14.209	11.151	27.614	12.561	13.859	8.613	18.848	11.892	8.919	6.04	10.303	11.274	17.485	13.841	6.651	10.382	11.215	8.058	16.616	8.515	7.051	9.15	14.238	8.7	19.404	10.96	14.227	12.367	17.464	8.624	12.935	17.071	23.632	27.972	11.385	13.715	19.94	11.084	21.474	7.32	10.397	16.49	6.737	8.261	8.79	14.633
398.8	13.823	19.169	7.358	14.705	11.488	28.064	12.884	14.192	8.822	19.392	12.193	9.197	6.135	10.634	11.638	17.932	14.159	6.856	10.729	11.608	8.249	17.167	8.733	7.275	9.381	14.749	8.954	20.039	11.249	14.679	12.736	18.023	8.954	13.292	17.615	24.289	28.612	11.75	14.222	20.567	11.459	22.107	7.584	10.776	17.025	7.07	8.628	9.135	15.067
399.24	14.107	19.628	7.543	15.195	11.834	28.517	13.204	14.538	9.053	19.953	12.512	9.493	6.245	10.969	11.987	18.405	14.505	7.069	11.081	12.026	8.444	17.726	8.946	7.504	9.619	15.272	9.212	20.679	11.545	15.141	13.088	18.573	9.272	13.626	18.134	24.923	29.227	12.102	14.735	21.159	11.807	22.684	7.839	11.138	17.52	7.39	8.986	9.491	15.483
399.68	14.399	20.104	7.725	15.689	12.191	28.956	13.51	14.892	9.278	20.492	12.822	9.779	6.344	11.311	12.345	18.845	14.842	7.282	11.43	12.445	8.639	18.275	9.164	7.736	9.866	15.798	9.474	21.301	11.818	15.604	13.422	19.124	9.602	13.953	18.655	25.551	29.825	12.473	15.226	21.758	12.165	23.262	8.101	11.504	18.045	7.724	9.365	9.836	15.935
400.13	14.669	20.529	7.902	16.176	12.52	29.4	13.797	15.22	9.512	21.022	13.148	10.066	6.444	11.646	12.686	19.29	15.163	7.491	11.77	12.863	8.824	18.825	9.368	7.968	10.095	16.302	9.718	21.933	12.083	16.064	13.749	19.639	9.925	14.281	19.168	26.163	30.419	12.831	15.719	22.352	12.517	23.833	8.354	11.868	18.522	8.043	9.74	10.198	16.378
400.57	14.927	20.964	8.073	16.682	12.856	29.825	14.096	15.538	9.744	21.567	13.469	10.358	6.559	11.999	13.034	19.726	15.491	7.722	12.124	13.265	9.013	19.382	9.58	8.211	10.331	16.828	9.967	22.556	12.36	16.533	14.084	20.182	10.256	14.622	19.695	26.78	31.028	13.18	16.226	22.917	12.882	24.407	8.614	12.234	19.024	8.382	10.123	10.568	16.831
401.01	15.195	21.41	8.262	17.196	13.217	30.263	14.406	15.88	9.987	22.121	13.798	10.655	6.679	12.356	13.383	20.158	15.815	7.956	12.497	13.689	9.22	19.943	9.789	8.465	10.584	17.385	10.224	23.203	12.636	17.011	14.431	20.702	10.585	14.941	20.205	27.41	31.592	13.537	16.735	23.495	13.254	24.979	8.89	12.622	19.518	8.763	10.535	10.974	17.294
401.45	15.458	21.835	8.443	17.703	13.561	30.676	14.722	16.199	10.219	22.669	14.103	10.955	6.792	12.723	13.756	20.583	16.136	8.184	12.87	14.136	9.427	20.492	9.985	8.716	10.833	17.946	10.471	23.826	12.899	17.473	14.783	21.224	10.93	15.245	20.714	28.006	32.176	13.889	17.235	24.059	13.603	25.534	9.164	12.979	19.999	9.121	10.932	11.362	17.734
401.89	15.719	22.266	8.636	18.23	13.896	31.093	15.022	16.527	10.48	23.232	14.427	11.266	6.914	13.105	14.111	21.024	16.458	8.407	13.242	14.591	9.647	21.059	10.205	8.986	11.093	18.507	10.736	24.456	13.189	17.936	15.127	21.754	11.278	15.566	21.223	28.595	32.742	14.255	17.757	24.632	13.971	26.11	9.451	13.363	20.494	9.512	11.347	11.775	18.184
402.33	15.971	22.71	8.818	18.752	14.261	31.512	15.339	16.838	10.717	23.787	14.764	11.576	7.038	13.495	14.49	21.463	16.786	8.663	13.627	15.033	9.863	21.647	10.416	9.275	11.354	19.056	10.995	25.107	13.478	18.416	15.47	22.317	11.637	15.891	21.753	29.209	33.342	14.625	18.295	25.214	14.358	26.679	9.743	13.777	21.011	9.902	11.782	12.207	18.649
402.78	16.218	23.135	9.015	19.275	14.63	31.92	15.635	17.152	10.97	24.334	15.106	11.883	7.16	13.861	14.857	21.881	17.118	8.916	13.989	15.482	10.072	22.219	10.643	9.579	11.593	19.629	11.27	25.762	13.761	18.9	15.808	22.856	12.002	16.22	22.267	29.806	33.913	14.979	18.808	25.786	14.742	27.258	10.045	14.167	21.496	10.31	12.241	12.647	19.108
403.22	16.486	23.56	9.204	19.81	14.986	32.327	15.948	17.465	11.232	24.894	15.444	12.203	7.3	14.26	15.243	22.291	17.445	9.174	14.378	15.94	10.285	22.813	10.878	9.881	11.843	20.206	11.538	26.392	14.053	19.405	16.147	23.415	12.373	16.54	22.798	30.418	34.49	15.339	19.327	26.397	15.115	27.823	10.362	14.592	22.005	10.736	12.704	13.1	19.6
403.66	16.746	23.98	9.37	20.322	15.34	32.728	16.26	17.76	11.488	25.44	15.774	12.496	7.427	14.638	15.632	22.696	17.773	9.437	14.78	16.405	10.503	23.408	11.108	10.185	12.083	20.788	11.797	27.043	14.326	19.89	16.462	23.924	12.73	16.861	23.293	31.01	35.016	15.686	19.836	26.949	15.491	28.356	10.665	14.991	22.474	11.15	13.167	13.567	20.077
404.1	16.995	24.411	9.559	20.834	15.685	33.118	16.549	18.073	11.746	26	16.12	12.802	7.556	15.023	16.007	23.096	18.097	9.707	15.174	16.862	10.731	23.997	11.332	10.497	12.321	21.365	12.065	27.693	14.589	20.372	16.793	24.454	13.112	17.179	23.787	31.585	35.534	16.038	20.348	27.519	15.851	28.904	10.968	15.389	22.941	11.593	13.629	14.042	20.554
404.54	17.24	24.828	9.739	21.333	16.001	33.47	16.821	18.364	12.001	26.519	16.426	13.111	7.673	15.419	16.377	23.485	18.404	9.975	15.546	17.345	10.942	24.571	11.54	10.802	12.563	21.925	12.317	28.31	14.844	20.859	17.104	24.969	13.457	17.468	24.264	32.164	36.047	16.376	20.837	28.054	16.206	29.427	11.275	15.773	23.409	12.01	14.08	14.519	20.996
404.98	17.447	25.225	9.905	21.829	16.34	33.832	17.083	18.657	12.248	27.035	16.75	13.41	7.794	15.793	16.74	23.884	18.721	10.233	15.918	17.788	11.159	25.12	11.756	11.112	12.803	22.482	12.576	28.911	15.097	21.334	17.428	25.457	13.804	17.774	24.731	32.705	36.519	16.701	21.334	28.578	16.546	29.924	11.587	16.149	23.889	12.422	14.534	14.98	21.426
405.43	17.685	25.607	10.072	22.332	16.685	34.219	17.363	18.927	12.508	27.537	17.07	13.712	7.928	16.183	17.107	24.256	19.024	10.498	16.276	18.248	11.376	25.69	11.964	11.457	13.042	23.041	12.83	29.518	15.365	21.799	17.767	25.962	14.149	18.076	25.212	33.229	37.004	17.032	21.828	29.099	16.892	30.436	11.884	16.561	24.363	12.863	15.024	15.489	21.856
405.87	17.895	25.947	10.221	22.802	17.006	34.571	17.619	19.191	12.742	28.035	17.38	13.995	8.041	16.572	17.471	24.63	19.305	10.759	16.628	18.696	11.591	26.235	12.171	11.782	13.265	23.557	13.066	30.089	15.608	22.242	18.063	26.419	14.491	18.36	25.663	33.741	37.47	17.344	22.289	29.611	17.239	30.907	12.177	16.947	24.805	13.289	15.499	15.981	22.259
406.31	18.092	26.27	10.381	23.27	17.336	34.891	17.878	19.428	12.976	28.54	17.688	14.29	8.169	16.923	17.829	24.968	19.59	11.019	16.974	19.135	11.804	26.791	12.361	12.113	13.48	24.081	13.3	30.654	15.864	22.667	18.378	26.876	14.849	18.66	26.118	34.257	37.947	17.671	22.772	30.156	17.591	31.396	12.487	17.326	25.249	13.73	16	16.487	22.676
406.75	18.312	26.619	10.554	23.764	17.671	35.235	18.127	19.667	13.242	29.04	18.007	14.605	8.297	17.332	18.199	25.334	19.885	11.287	17.333	19.567	12.035	27.331	12.565	12.469	13.691	24.611	13.563	31.209	16.122	23.106	18.681	27.359	15.204	18.966	26.57	34.765	38.39	17.993	23.24	30.672	17.904	31.863	12.805	17.712	25.695	14.176	16.504	17.006	23.074
407.19	18.516	26.953	10.697	24.219	17.973	35.578	18.375	19.908	13.492	29.514	18.319	14.884	8.428	17.712	18.544	25.678	20.173	11.569	17.693	20.024	12.261	27.877	12.741	12.79	13.919	25.138	13.802	31.746	16.369	23.549	18.965	27.81	15.54	19.226	27.005	35.267	38.852	18.309	23.702	31.142	18.233	32.281	13.114	18.07	26.1	14.615	16.996	17.523	23.495
407.63	18.727	27.283	10.841	24.68	18.292	35.897	18.629	20.142	13.732	29.974	18.613	15.166	8.557	18.09	18.903	26.001	20.43	11.838	18.051	20.462	12.475	28.424	12.926	13.121	14.134	25.672	14.034	32.283	16.597	23.975	19.231	28.243	15.888	19.49	27.425	35.746	39.283	18.609	24.151	31.627	18.562	32.748	13.413	18.439	26.522	15.072	17.489	18.036	23.893
408.07	18.91	27.574	10.978	25.137	18.598	36.235	18.866	20.343	13.972	30.443	18.891	15.439	8.684	18.459	19.246	26.313	20.7	12.097	18.402	20.894	12.686	28.955	13.109	13.446	14.34	26.176	14.257	32.801	16.826	24.386	19.492	28.687	16.223	19.783	27.833	36.228	39.696	18.899	24.597	32.094	18.886	33.19	13.701	18.822	26.909	15.514	17.978	18.587	24.263
408.52	19.135	27.889	11.124	25.581	18.926	36.527	19.114	20.561	14.212	30.917	19.177	15.715	8.823	18.838	19.603	26.638	20.971	12.382	18.753	21.321	12.919	29.494	13.295	13.791	14.544	26.688	14.5	33.326	17.043	24.795	19.745	29.127	16.532	20.048	28.262	36.707	40.071	19.2	25.034	32.532	19.208	33.619	13.985	19.179	27.322	15.973	18.47	19.117	24.607
408.96	19.338	28.176	11.275	26.002	19.223	36.851	19.343	20.78	14.436	31.331	19.448	15.984	8.939	19.205	19.938	26.906	21.22	12.637	19.091	21.764	13.127	29.992	13.475	14.139	14.723	27.188	14.724	33.833	17.263	25.192	19.994	29.501	16.851	20.291	28.665	37.166	40.439	19.491	25.429	32.993	19.493	34.024	14.256	19.519	27.693	16.417	18.965	19.639	24.939
409.4	19.51	28.469	11.418	26.431	19.513	37.138	19.585	20.989	14.653	31.772	19.733	16.264	9.059	19.56	20.291	27.221	21.475	12.911	19.436	22.195	13.348	30.523	13.648	14.5	14.929	27.644	14.953	34.327	17.499	25.587	20.235	29.93	17.164	20.559	29.087	37.608	40.808	19.786	25.853	33.413	19.783	34.423	14.548	19.868	28.063	16.835	19.452	20.159	25.252
409.84	19.706	28.76	11.565	26.857	19.81	37.426	19.815	21.208	14.871	32.222	20.04	16.544	9.182	19.935	20.63	27.522	21.734	13.185	19.766	22.649	13.566	31.062	13.841	14.87	15.123	28.112	15.208	34.831	17.742	25.967	20.483	30.342	17.48	20.816	29.508	38.058	41.181	20.068	26.283	33.874	20.087	34.814	14.857	20.236	28.494	17.299	19.969	20.709	25.596
410.28	19.868	29.007	11.694	27.248	20.108	37.696	20.039	21.396	15.084	32.605	20.305	16.805	9.298	20.266	20.95	27.78	21.949	13.467	20.069	23.067	13.77	31.564	13.994	15.229	15.284	28.582	15.416	35.298	17.947	26.34	20.711	30.718	17.79	21.048	29.871	38.474	41.516	20.347	26.656	34.267	20.361	35.167	15.148	20.576	28.851	17.724	20.458	21.232	25.884
410.72	20.017	29.261	11.821	27.657	20.398	37.953	20.257	21.58	15.301	33.016	20.572	17.072	9.411	20.617	21.289	28.039	22.191	13.727	20.406	23.496	13.991	32.068	14.151	15.594	15.443	29.052	15.632	35.767	18.129	26.703	20.94	31.108	18.095	21.293	30.26	38.87	41.855	20.61	27.057	34.683	20.62	35.553	15.433	20.905	29.185	18.162	20.966	21.766	26.142
411.16	20.184	29.526	11.939	28.059	20.681	38.25	20.504	21.756	15.513	33.429	20.85	17.341	9.53	20.999	21.643	28.312	22.43	13.993	20.733	23.942	14.221	32.573	14.31	15.95	15.6	29.515	15.85	36.254	18.326	27.066	21.177	31.501	18.418	21.527	30.667	39.301	42.196	20.888	27.469	35.099	20.895	35.93	15.724	21.274	29.586	18.617	21.487	22.338	26.417
411.6	20.341	29.772	12.068	28.453	20.978	38.512	20.729	21.935	15.717	33.858	21.116	17.603	9.634	21.346	21.957	28.568	22.668	14.26	21.072	24.397	14.456	33.093	14.45	16.311	15.762	29.973	16.066	36.749	18.516	27.409	21.4	31.875	18.752	21.775	31.027	39.72	42.522	21.181	27.867	35.497	21.177	36.337	16.006	21.616	29.958	19.075	22.022	22.933	26.683
412.04	20.49	30.012	12.21	28.863	21.246	38.775	20.931	22.107	15.912	34.239	21.39	17.876	9.747	21.707	22.265	28.811	22.878	14.529	21.375	24.797	14.672	33.584	14.6	16.695	15.929	30.405	16.281	37.184	18.711	27.746	21.618	32.262	19.062	22.01	31.386	40.099	42.862	21.45	28.245	35.897	21.443	36.728	16.298	21.953	30.337	19.531	22.526	23.468	26.914
412.49	20.632	30.242	12.317	29.249	21.513	39.046	21.155	22.262	16.103	34.585	21.626	18.124	9.849	22.034	22.571	29.048	23.073	14.797	21.67	25.198	14.87	34.066	14.732	17.035	16.08	30.825	16.485	37.595	18.885	28.074	21.804	32.589	19.356	22.226	31.725	40.445	43.173	21.698	28.6	36.241	21.678	37.047	16.558	22.269	30.649	19.935	22.991	23.973	27.138
412.93	20.783	30.443	12.445	29.615	21.791	39.289	21.38	22.398	16.284	34.956	21.863	18.377	9.967	22.335	22.89	29.291	23.303	15.042	21.963	25.571	15.086	34.495	14.875	17.389	16.222	31.228	16.686	38.016	19.067	28.383	21.968	32.91	19.63	22.456	32.057	40.764	43.456	21.933	28.932	36.581	21.892	37.339	16.814	22.568	30.959	20.36	23.457	24.479	27.335
413.37	20.923	30.626	12.566	29.935	22.028	39.522	21.571	22.536	16.462	35.305	22.1	18.606	10.059	22.649	23.185	29.497	23.49	15.297	22.231	25.955	15.266	34.942	15.023	17.739	16.351	31.61	16.869	38.415	19.236	28.666	22.154	33.243	19.912	22.677	32.391	41.108	43.78	22.17	29.245	36.931	22.13	37.653	17.066	22.861	31.249	20.77	23.949	25.025	27.546
413.81	21.059	30.805	12.684	30.255	22.255	39.723	21.746	22.658	16.632	35.645	22.322	18.837	10.155	22.931	23.465	29.699	23.686	15.546	22.505	26.314	15.462	35.364	15.157	18.053	16.475	31.98	17.057	38.793	19.382	28.948	22.327	33.562	20.201	22.887	32.706	41.447	44.081	22.421	29.579	37.286	22.38	37.95	17.342	23.157	31.559	21.159	24.397	25.522	27.747
414.25	21.212	31.023	12.799	30.595	22.507	39.957	21.951	22.796	16.798	35.993	22.558	19.07	10.263	23.224	23.76	29.908	23.893	15.798	22.786	26.68	15.649	35.811	15.3	18.391	16.607	32.366	17.237	39.195	19.533	29.241	22.495	33.855	20.448	23.091	33.004	41.768	44.332	22.639	29.896	37.601	22.577	38.252	17.598	23.426	31.833	21.538	24.823	26.011	27.941
414.69	21.357	31.245	12.904	30.938	22.736	40.198	22.138	22.943	16.963	36.335	22.789	19.295	10.373	23.543	24.05	30.135	24.099	16.048	23.054	27.065	15.828	36.242	15.433	18.745	16.728	32.753	17.407	39.572	19.681	29.549	22.669	34.127	20.691	23.268	33.28	42.075	44.605	22.859	30.204	37.889	22.77	38.54	17.83	23.689	32.122	21.921	25.241	26.477	28.128
415.13	21.441	31.421	12.989	31.228	22.965	40.374	22.304	23.058	17.11	36.624	23.003	19.485	10.473	23.785	24.305	30.302	24.268	16.262	23.299	27.408	16.019	36.665	15.539	19.039	16.859	33.087	17.544	39.925	19.811	29.804	22.821	34.413	20.93	23.448	33.577	42.402	44.861	23.065	30.494	38.195	22.969	38.84	18.047	23.952	32.386	22.29	25.652	26.953	28.353
415.57	21.57	31.62	13.091	31.547	23.192	40.563	22.478	23.2	17.264	36.93	23.219	19.721	10.573	24.067	24.583	30.493	24.433	16.497	23.529	27.735	16.192	37.066	15.681	19.365	16.976	33.446	17.718	40.292	19.957	30.057	22.973	34.697	21.146	23.661	33.846	42.683	45.093	23.249	30.758	38.499	23.159	39.142	18.26	24.223	32.667	22.667	26.058	27.41	28.532
416.01	21.681	31.81	13.187	31.851	23.411	40.738	22.659	23.303	17.42	37.209	23.446	19.927	10.659	24.318	24.834	30.655	24.596	16.712	23.762	28.051	16.375	37.436	15.807	19.695	17.083	33.763	17.9	40.644	20.113	30.296	23.127	34.935	21.36	23.845	34.105	42.926	45.303	23.435	31.036	38.772	23.35	39.377	18.469	24.461	32.915	22.986	26.438	27.838	28.697
416.45	21.801	32.003	13.288	32.148	23.627	40.925	22.837	23.419	17.549	37.506	23.677	20.143	10.758	24.596	25.098	30.845	24.759	16.946	23.995	28.405	16.548	37.818	15.93	20.04	17.196	34.083	18.066	40.969	20.256	30.554	23.292	35.201	21.584	24.021	34.382	43.182	45.522	23.634	31.31	39.037	23.524	39.626	18.696	24.71	33.186	23.34	26.832	28.247	28.866
416.89	21.899	32.172	13.377	32.447	23.812	41.122	23.005	23.53	17.666	37.777	23.869	20.337	10.834	24.848	25.341	30.992	24.912	17.153	24.216	28.717	16.707	38.177	16.045	20.362	17.304	34.423	18.234	41.28	20.388	30.796	23.442	35.419	21.823	24.192	34.59	43.403	45.748	23.808	31.57	39.272	23.681	39.858	18.885	24.923	33.426	23.656	27.191	28.654	29.014
417.33	21.995	32.356	13.456	32.763	24.021	41.286	23.169	23.638	17.811	38.078	24.082	20.534	10.935	25.108	25.59	31.199	25.072	17.377	24.434	29.022	16.88	38.56	16.165	20.673	17.421	34.769	18.405	41.604	20.509	31.053	23.589	35.692	22.053	24.383	34.833	43.653	45.955	24.009	31.822	39.515	23.861	40.104	19.102	25.155	33.677	24.016	27.562	29.103	29.188
417.77	22.099	32.517	13.54	33.071	24.24	41.472	23.306	23.733	17.946	38.367	24.306	20.734	11.024	25.376	25.843	31.365	25.241	17.6	24.655	29.34	17.034	38.93	16.282	20.991	17.521	35.127	18.572	41.977	20.634	31.311	23.749	35.945	22.304	24.594	35.083	43.911	46.201	24.192	32.083	39.791	24.036	40.362	19.322	25.405	33.96	24.378	27.936	29.544	29.39
418.21	22.203	32.685	13.607	33.392	24.479	41.661	23.461	23.817	18.075	38.609	24.51	20.933	11.108	25.631	26.099	31.527	25.391	17.847	24.871	29.65	17.197	39.306	16.399	21.313	17.614	35.497	18.726	42.292	20.746	31.588	23.894	36.207	22.55	24.793	35.313	44.152	46.406	24.371	32.333	40.023	24.203	40.631	19.532	25.632	34.171	24.711	28.325	29.979	29.544
418.65	22.309	32.871	13.69	33.702	24.689	41.875	23.619	23.928	18.211	38.919	24.751	21.139	11.181	25.915	26.386	31.705	25.583	18.075	25.116	29.985	17.36	39.711	16.541	21.659	17.722	35.861	18.895	42.661	20.869	31.853	24.05	36.488	22.779	24.996	35.595	44.439	46.643	24.554	32.612	40.297	24.379	40.897	19.756	25.846	34.43	25.06	28.734	30.427	29.701
419.09	22.452	33.068	13.776	34.011	24.9	42.072	23.768	24.034	18.344	39.23	24.99	21.338	11.282	26.188	26.644	31.879	25.757	18.316	25.333	30.327	17.519	40.084	16.675	22.01	17.833	36.23	19.075	43.012	21.017	32.154	24.214	36.75	23.04	25.199	35.846	44.723	46.856	24.756	32.871	40.551	24.551	41.152	19.97	26.087	34.726	25.415	29.122	30.9	29.886
419.53	22.559	33.249	13.869	34.351	25.138	42.276	23.931	24.161	18.49	39.549	25.217	21.54	11.375	26.467	26.906	32.076	25.924	18.573	25.609	30.699	17.692	40.542	16.797	22.376	17.948	36.618	19.253	43.349	21.162	32.463	24.376	37.029	23.279	25.435	36.107	45.009	47.133	24.93	33.153	40.835	24.733	41.387	20.193	26.328	35.009	25.784	29.54	31.366	30.043
419.98	22.647	33.454	13.949	34.692	25.365	42.501	24.062	24.285	18.618	39.845	25.445	21.756	11.471	26.764	27.198	32.283	26.094	18.826	25.808	31.05	17.865	40.977	16.942	22.757	18.05	36.999	19.434	43.724	21.326	32.775	24.545	37.313	23.514	25.643	36.374	45.285	47.389	25.114	33.412	41.107	24.904	41.623	20.427	26.562	35.309	26.149	29.955	31.841	30.216
420.42	22.761	33.65	14.026	35.014	25.605	42.704	24.206	24.415	18.76	40.151	25.66	21.986	11.579	27.035	27.494	32.481	26.275	19.062	26.04	31.42	18.02	41.394	17.076	23.122	18.145	37.404	19.638	44.115	21.476	33.084	24.733	37.609	23.779	25.869	36.639	45.604	47.663	25.324	33.711	41.396	25.099	41.91	20.679	26.8	35.61	26.534	30.377	32.328	30.407
420.86	22.877	33.797	14.114	35.325	25.813	42.897	24.329	24.523	18.888	40.44	25.898	22.183	11.687	27.319	27.768	32.668	26.458	19.263	26.249	31.767	18.173	41.789	17.226	23.48	18.263	37.776	19.821	44.482	21.613	33.381	24.899	37.913	24.028	26.08	36.904	45.905	47.911	25.521	33.994	41.689	25.307	42.204	20.924	27.056	35.954	26.921	30.807	32.83	30.606
421.3	22.979	33.962	14.187	35.649	26.034	43.111	24.464	24.628	19.028	40.713	26.146	22.36	11.78	27.589	28.001	32.832	26.612	19.469	26.478	32.108	18.333	42.226	17.371	23.83	18.37	38.151	19.992	44.802	21.753	33.675	25.091	38.189	24.271	26.297	37.149	46.166	48.122	25.695	34.252	41.98	25.511	42.483	21.151	27.287	36.257	27.283	31.218	33.295	30.827
421.74	23.087	34.129	14.255	36.016	26.252	43.32	24.618	24.734	19.16	40.995	26.352	22.56	11.888	27.848	28.251	33.027	26.773	19.694	26.671	32.44	18.503	42.627	17.497	24.146	18.488	38.515	20.185	45.153	21.891	33.974	25.257	38.443	24.493	26.501	37.361	46.395	48.349	25.86	34.51	42.211	25.674	42.749	21.351	27.501	36.517	27.606	31.583	33.708	31.031
422.18	23.184	34.307	14.319	36.321	26.46	43.508	24.768	24.847	19.291	41.267	26.564	22.735	11.992	28.118	28.499	33.184	26.924	19.9	26.871	32.731	18.66	43.013	17.629	24.467	18.596	38.878	20.371	45.492	22.027	34.253	25.385	38.666	24.704	26.686	37.575	46.624	48.557	26.006	34.722	42.403	25.796	42.959	21.525	27.683	36.751	27.911	31.909	34.1	31.226
422.62	23.246	34.455	14.392	36.62	26.65	43.696	24.894	24.925	19.42	41.489	26.754	22.913	12.099	28.353	28.708	33.34	27.047	20.1	27.028	33.03	18.793	43.367	17.765	24.766	18.698	39.228	20.528	45.819	22.159	34.515	25.533	38.927	24.938	26.866	37.779	46.851	48.761	26.157	34.964	42.619	25.936	43.152	21.701	27.862	36.987	28.196	32.23	34.447	31.379
423.06	23.318	34.609	14.465	36.932	26.866	43.922	25.034	25.005	19.579	41.724	26.957	23.104	12.169	28.615	28.944	33.527	27.222	20.32	27.209	33.342	18.96	43.75	17.919	25.095	18.808	39.593	20.728	46.171	22.319	34.818	25.677	39.188	25.163	27.084	38.009	47.081	48.943	26.325	35.177	42.846	26.073	43.384	21.902	28.044	37.243	28.502	32.576	34.841	31.535
423.5	23.45	34.789	14.546	37.273	27.077	44.155	25.191	25.13	19.712	42.045	27.172	23.316	12.262	28.882	29.183	33.731	27.404	20.539	27.408	33.705	19.093	44.125	18.081	25.44	18.907	39.985	20.934	46.518	22.479	35.124	25.86	39.43	25.38	27.298	38.213	47.269	49.172	26.494	35.413	43.096	26.239	43.625	22.125	28.232	37.541	28.833	32.936	35.216	31.667
423.94	23.535	34.948	14.612	37.566	27.282	44.377	25.309	25.234	19.85	42.294	27.378	23.479	12.357	29.124	29.402	33.922	27.58	20.724	27.608	34.028	19.224	44.523	18.215	25.787	18.996	40.346	21.115	46.869	22.594	35.439	26.049	39.698	25.631	27.492	38.445	47.497	49.428	26.673	35.686	43.327	26.409	43.916	22.36	28.444	37.839	29.164	33.311	35.641	31.856
424.38	23.615	35.093	14.695	37.884	27.475	44.581	25.423	25.354	19.983	42.553	27.553	23.656	12.45	29.392	29.636	34.136	27.734	20.931	27.783	34.346	19.362	44.904	18.347	26.096	19.098	40.713	21.284	47.184	22.705	35.75	26.208	39.955	25.853	27.686	38.672	47.739	49.662	26.851	35.888	43.558	26.54	44.165	22.589	28.634	38.094	29.47	33.665	36.047	32.035
424.82	23.688	35.227	14.754	38.167	27.658	44.76	25.539	25.459	20.112	42.782	27.743	23.81	12.516	29.617	29.853	34.319	27.892	21.126	27.951	34.627	19.494	45.274	18.499	26.381	19.182	41.085	21.455	47.52	22.827	36.049	26.349	40.144	26.051	27.874	38.862	47.952	49.883	26.995	36.124	43.784	26.691	44.387	22.77	28.816	38.346	29.763	33.989	36.434	32.242
425.25	23.772	35.388	14.83	38.466	27.853	44.929	25.647	25.567	20.261	43.003	27.958	23.97	12.609	29.841	30.076	34.508	28.054	21.302	28.12	34.943	19.623	45.638	18.638	26.687	19.279	41.437	21.627	47.833	22.95	36.35	26.506	40.413	26.233	28.066	39.064	48.173	50.11	27.145	36.346	44.029	26.823	44.624	22.987	29.031	38.604	30.063	34.305	36.806	32.455
425.69	23.841	35.553	14.902	38.753	28.056	45.129	25.754	25.681	20.397	43.24	28.149	24.141	12.681	30.066	30.33	34.686	28.194	21.491	28.276	35.253	19.768	45.994	18.766	27.004	19.392	41.777	21.803	48.131	23.083	36.612	26.655	40.643	26.393	28.252	39.258	48.369	50.313	27.289	36.574	44.248	26.945	44.856	23.178	29.229	38.853	30.335	34.615	37.136	32.64
426.13	23.93	35.69	14.962	39.023	28.219	45.301	25.86	25.782	20.519	43.426	28.306	24.284	12.768	30.295	30.538	34.846	28.315	21.663	28.401	35.532	19.904	46.305	18.911	27.282	19.481	42.135	21.956	48.384	23.192	36.865	26.809	40.849	26.569	28.403	39.42	48.543	50.497	27.419	36.766	44.445	27.07	45.047	23.35	29.376	39.094	30.595	34.939	37.488	32.801
426.57	23.989	35.823	15.024	39.307	28.367	45.501	25.953	25.907	20.668	43.651	28.486	24.419	12.86	30.531	30.753	35.044	28.449	21.84	28.548	35.817	20.025	46.656	19.053	27.579	19.589	42.457	22.13	48.708	23.321	37.161	26.962	41.081	26.751	28.589	39.621	48.746	50.701	27.583	36.958	44.674	27.225	45.272	23.545	29.567	39.379	30.867	35.267	37.866	33.029
427.01	24.075	35.984	15.103	39.615	28.553	45.673	26.057	26.002	20.798	43.842	28.676	24.563	12.966	30.757	30.972	35.23	28.608	22.025	28.702	36.099	20.17	46.992	19.194	27.872	19.707	42.782	22.32	48.981	23.448	37.442	27.141	41.338	26.949	28.812	39.829	48.956	50.923	27.747	37.188	44.902	27.379	45.508	23.75	29.802	39.681	31.172	35.581	38.261	33.319
427.45	24.164	36.129	15.177	39.949	28.75	45.889	26.169	26.124	20.96	44.063	28.879	24.734	13.066	30.994	31.204	35.424	28.765	22.223	28.858	36.411	20.319	47.392	19.369	28.178	19.837	43.166	22.512	49.312	23.585	37.708	27.317	41.591	27.151	29.032	40.032	49.193	51.196	27.913	37.411	45.148	27.52	45.752	23.964	30.011	39.951	31.484	35.932	38.666	33.61
427.89	24.284	36.326	15.272	40.286	28.952	46.057	26.243	26.254	21.129	44.32	29.108	24.914	13.167	31.27	31.467	35.619	28.963	22.397	29.013	36.75	20.467	47.771	19.568	28.505	19.997	43.586	22.716	49.666	23.737	38.023	27.486	41.87	27.359	29.229	40.263	49.394	51.446	28.111	37.62	45.368	27.67	46.043	24.192	30.214	40.228	31.8	36.247	39.055	33.955
428.33	24.393	36.49	15.362	40.618	29.135	46.269	26.351	26.381	21.32	44.54	29.354	25.082	13.273	31.499	31.688	35.793	29.133	22.591	29.223	37.052	20.608	48.175	19.759	28.813	20.141	44.007	22.919	49.945	23.854	38.338	27.633	42.101	27.539	29.414	40.478	49.568	51.644	28.261	37.835	45.559	27.796	46.267	24.379	30.382	40.457	32.088	36.526	39.376	34.235
428.77	24.514	36.678	15.467	40.969	29.35	46.508	26.472	26.516	21.507	44.811	29.593	25.241	13.387	31.776	31.941	36.011	29.316	22.832	29.408	37.386	20.777	48.602	19.976	29.14	20.311	44.427	23.105	50.275	23.983	38.669	27.788	42.32	27.699	29.593	40.658	49.737	51.808	28.402	37.998	45.752	27.909	46.439	24.539	30.537	40.653	32.321	36.823	39.731	34.517
429.21	24.606	36.9	15.538	41.296	29.548	46.694	26.562	26.647	21.686	45.053	29.79	25.404	13.482	32.004	32.175	36.211	29.459	23.033	29.58	37.701	20.933	48.961	20.157	29.456	20.449	44.822	23.286	50.59	24.13	38.98	27.941	42.513	27.853	29.785	40.811	49.91	52.003	28.527	38.157	45.913	28.014	46.611	24.715	30.67	40.826	32.536	37.089	40.035	34.754
429.65	24.677	37.067	15.598	41.58	29.728	46.845	26.611	26.761	21.841	45.249	29.95	25.515	13.573	32.197	32.394	36.393	29.582	23.233	29.699	37.97	21.045	49.265	20.313	29.728	20.574	45.191	23.423	50.887	24.236	39.245	28.053	42.693	27.991	29.921	40.966	50.027	52.162	28.644	38.311	46.042	28.09	46.814	24.852	30.808	40.985	32.708	37.292	40.328	34.97
430.09	24.746	37.227	15.66	41.811	29.889	46.992	26.652	26.884	21.999	45.429	30.169	25.633	13.648	32.398	32.607	36.553	29.704	23.376	29.861	38.207	21.142	49.545	20.447	30.002	20.666	45.561	23.537	51.16	24.346	39.508	28.144	42.856	28.141	30.053	41.112	50.171	52.295	28.755	38.441	46.176	28.149	46.951	25.007	30.942	41.159	32.872	37.463	40.558	35.154
430.53	24.829	37.404	15.73	42.103	30.051	47.158	26.68	26.995	22.12	45.615	30.357	25.759	13.712	32.586	32.829	36.749	29.842	23.53	29.986	38.52	21.256	49.871	20.611	30.289	20.77	45.933	23.667	51.418	24.458	39.784	28.279	43.042	28.281	30.216	41.241	50.319	52.453	28.86	38.565	46.34	28.221	47.119	25.187	31.074	41.335	33.053	37.663	40.817	35.326
430.97	24.905	37.598	15.803	42.394	30.215	47.318	26.699	27.121	22.266	45.824	30.554	25.898	13.773	32.821	33.087	36.936	29.992	23.717	30.149	38.808	21.383	50.194	20.758	30.601	20.853	46.342	23.833	51.685	24.568	40.068	28.425	43.252	28.423	30.382	41.385	50.47	52.627	28.991	38.713	46.513	28.341	47.307	25.373	31.242	41.554	33.312	37.945	41.213	35.556
431.41	24.999	37.783	15.866	42.683	30.392	47.469	26.731	27.257	22.396	46.028	30.758	26.012	13.878	33.024	33.308	37.098	30.097	23.87	30.284	39.101	21.482	50.534	20.927	30.888	20.957	46.726	23.993	51.963	24.663	40.292	28.561	43.447	28.577	30.529	41.528	50.616	52.815	29.109	38.866	46.703	28.479	47.484	25.559	31.425	41.77	33.561	38.186	41.553	35.818
431.85	25.059	37.951	15.928	42.965	30.552	47.645	26.765	27.373	22.553	46.181	30.956	26.104	13.963	33.236	33.542	37.269	30.209	24.031	30.426	39.362	21.6	50.857	21.085	31.182	21.068	47.129	24.125	52.219	24.751	40.588	28.668	43.652	28.725	30.653	41.665	50.795	52.984	29.242	39.019	46.806	28.574	47.668	25.714	31.588	41.956	33.774	38.421	41.895	36.088
432.29	25.13	38.117	15.996	43.276	30.694	47.79	26.814	27.49	22.702	46.382	31.173	26.208	14.055	33.44	33.797	37.435	30.318	24.206	30.539	39.653	21.724	51.175	21.255	31.444	21.2	47.517	24.289	52.483	24.87	40.881	28.75	43.801	28.823	30.773	41.77	50.9	53.091	29.333	39.106	46.895	28.627	47.755	25.811	31.67	42.093	33.892	38.576	42.122	36.26
432.73	25.202	38.275	16.045	43.529	30.846	47.949	26.83	27.599	22.852	46.57	31.389	26.3	14.13	33.606	34.038	37.572	30.457	24.344	30.689	39.907	21.819	51.469	21.428	31.73	21.292	47.889	24.421	52.73	24.973	41.143	28.859	43.985	28.942	30.902	41.905	51.022	53.237	29.412	39.262	47.023	28.722	47.907	25.959	31.805	42.286	34.105	38.784	42.378	36.485
433.16	25.294	38.43	16.12	43.822	31.009	48.158	26.865	27.723	23.015	46.736	31.591	26.433	14.225	33.803	34.244	37.721	30.575	24.506	30.821	40.164	21.926	51.756	21.568	32.012	21.403	48.227	24.552	52.989	25.074	41.396	29.013	44.225	29.087	31.068	42.049	51.191	53.431	29.541	39.391	47.157	28.811	48.063	26.163	31.92	42.474	34.301	39.042	42.685	36.651
433.6	25.351	38.602	16.178	44.085	31.165	48.333	26.878	27.837	23.157	46.945	31.81	26.572	14.309	33.996	34.458	37.883	30.697	24.68	30.958	40.448	22.042	52.086	21.736	32.27	21.517	48.602	24.66	53.274	25.181	41.646	29.135	44.382	29.233	31.176	42.218	51.303	53.568	29.658	39.486	47.291	28.911	48.231	26.335	32.056	42.641	34.464	39.245	42.958	36.843
434.04	25.462	38.745	16.232	44.335	31.283	48.482	26.89	27.927	23.278	47.119	32.01	26.641	14.394	34.179	34.617	38.045	30.817	24.834	31.081	40.692	22.137	52.399	21.918	32.5	21.599	48.973	24.776	53.553	25.271	41.911	29.268	44.572	29.383	31.311	42.339	51.436	53.747	29.732	39.6	47.394	29.016	48.367	26.496	32.167	42.789	34.6	39.421	43.246	37.058
434.48	25.562	38.935	16.31	44.633	31.444	48.682	26.939	28.056	23.429	47.338	32.223	26.76	14.488	34.343	34.833	38.226	30.94	24.999	31.239	40.986	22.242	52.732	22.109	32.784	21.72	49.339	24.928	53.848	25.378	42.195	29.398	44.785	29.531	31.461	42.502	51.632	53.907	29.875	39.741	47.559	29.116	48.579	26.673	32.31	42.997	34.787	39.647	43.546	37.306
434.92	25.669	39.154	16.401	44.908	31.601	48.832	27.011	28.175	23.601	47.545	32.446	26.884	14.579	34.536	35.063	38.373	31.088	25.136	31.408	41.275	22.377	53.038	22.314	33.061	21.834	49.764	25.068	54.123	25.468	42.455	29.502	44.95	29.645	31.597	42.636	51.803	54.109	29.99	39.874	47.678	29.201	48.738	26.812	32.414	43.134	34.957	39.81	43.812	37.506
435.36	25.763	39.323	16.466	45.183	31.733	49.013	27.045	28.289	23.753	47.773	32.642	26.994	14.663	34.71	35.273	38.528	31.191	25.284	31.527	41.531	22.501	53.317	22.498	33.287	21.941	50.168	25.16	54.408	25.563	42.724	29.606	45.121	29.763	31.717	42.752	51.965	54.273	30.083	39.979	47.815	29.274	48.94	26.927	32.521	43.265	35.116	40.023	44.058	37.679
435.8	25.843	39.483	16.521	45.411	31.868	49.163	27.072	28.381	23.899	47.909	32.827	27.094	14.741	34.9	35.458	38.695	31.301	25.431	31.657	41.744	22.6	53.615	22.671	33.508	22.032	50.502	25.274	54.634	25.666	43.005	29.699	45.32	29.86	31.838	42.927	52.116	54.448	30.174	40.115	47.942	29.383	49.117	27.103	32.645	43.479	35.292	40.225	44.294	37.916
436.24	25.931	39.61	16.572	45.639	31.968	49.339	27.134	28.473	24.014	48.032	32.981	27.185	14.835	35.019	35.62	38.858	31.367	25.593	31.739	41.897	22.706	53.865	22.817	33.731	22.111	50.805	25.395	54.867	25.735	43.218	29.794	45.461	29.973	31.939	43.01	52.257	54.528	30.266	40.222	48.071	29.462	49.225	27.248	32.75	43.622	35.415	40.402	44.523	38.095
436.68	26.026	39.739	16.621	45.852	32.103	49.453	27.179	28.552	24.144	48.183	33.141	27.27	14.943	35.181	35.827	39.048	31.498	25.713	31.803	42.13	22.813	54.083	22.969	33.958	22.222	51.129	25.498	55.092	25.83	43.429	29.912	45.649	30.114	32.097	43.132	52.443	54.718	30.377	40.355	48.22	29.56	49.409	27.414	32.903	43.768	35.572	40.591	44.809	38.329
437.11	26.105	39.869	16.665	46.042	32.202	49.576	27.193	28.637	24.277	48.313	33.305	27.349	15.024	35.316	35.973	39.185	31.57	25.795	31.883	42.312	22.892	54.284	23.129	34.149	22.307	51.437	25.593	55.287	25.917	43.612	30.035	45.836	30.241	32.237	43.29	52.609	54.877	30.477	40.517	48.34	29.673	49.609	27.575	33.044	43.988	35.744	40.766	45.094	38.563
437.55	26.194	39.963	16.717	46.257	32.314	49.69	27.255	28.709	24.397	48.43	33.478	27.434	15.096	35.453	36.127	39.29	31.696	25.902	31.928	42.432	22.985	54.518	23.256	34.329	22.374	51.748	25.663	55.452	25.956	43.772	30.124	45.996	30.332	32.345	43.425	52.721	54.997	30.563	40.613	48.476	29.711	49.756	27.688	33.153	44.114	35.865	40.923	45.293	38.755
437.99	26.322	40.073	16.773	46.493	32.42	49.832	27.356	28.789	24.527	48.587	33.7	27.57	15.181	35.614	36.304	39.458	31.827	26.031	32.011	42.629	23.084	54.743	23.405	34.544	22.494	52.036	25.825	55.665	26.042	43.98	30.227	46.173	30.446	32.48	43.571	52.918	55.217	30.667	40.747	48.626	29.784	49.907	27.848	33.272	44.282	36.038	41.142	45.53	38.982
438.43	26.449	40.229	16.845	46.751	32.525	49.96	27.478	28.859	24.667	48.737	33.848	27.695	15.306	35.738	36.451	39.61	31.926	26.156	32.094	42.848	23.216	55.024	23.618	34.763	22.623	52.306	25.96	55.827	26.096	44.175	30.324	46.345	30.531	32.593	43.714	53.101	55.372	30.782	40.857	48.792	29.886	50.103	27.999	33.391	44.458	36.23	41.372	45.815	39.215
438.87	26.574	40.358	16.913	47.006	32.618	50.096	27.576	28.969	24.862	48.88	34.03	27.792	15.424	35.9	36.611	39.769	32.034	26.309	32.187	43.022	23.326	55.256	23.779	34.963	22.781	52.574	26.082	56.025	26.181	44.36	30.473	46.551	30.651	32.733	43.875	53.271	55.552	30.924	41.02	48.944	30.008	50.345	28.126	33.547	44.68	36.449	41.641	46.125	39.525
439.31	26.74	40.447	16.976	47.214	32.733	50.266	27.699	29.066	25.061	49.021	34.248	27.845	15.537	36	36.756	39.897	32.128	26.402	32.287	43.216	23.435	55.519	23.982	35.141	22.925	52.846	26.22	56.177	26.251	44.559	30.575	46.736	30.759	32.851	44.058	53.459	55.737	31.032	41.148	49.076	30.084	50.59	28.236	33.683	44.862	36.565	41.842	46.351	39.848
439.75	26.928	40.592	17.042	47.462	32.863	50.397	27.785	29.175	25.256	49.197	34.472	27.961	15.661	36.156	36.962	40.081	32.257	26.545	32.456	43.386	23.574	55.763	24.176	35.305	23.104	53.137	26.378	56.355	26.362	44.838	30.634	46.924	30.835	32.958	44.212	53.601	55.88	31.108	41.268	49.172	30.114	50.749	28.331	33.767	44.962	36.655	41.996	46.57	40.131
440.18	27.111	40.741	17.101	47.674	32.979	50.509	27.879	29.247	25.439	49.345	34.657	28.056	15.765	36.279	37.139	40.231	32.388	26.725	32.56	43.551	23.721	56.012	24.394	35.534	23.276	53.407	26.557	56.578	26.457	45.008	30.756	47.087	30.949	33.104	44.393	53.739	56.029	31.166	41.36	49.295	30.188	50.895	28.448	33.884	45.106	36.731	42.147	46.798	40.398
440.62	27.397	40.978	17.254	47.986	33.239	50.75	28.034	29.343	25.661	49.552	34.982	28.309	15.939	36.515	37.391	40.456	32.58	26.915	32.816	43.802	23.983	56.313	24.695	35.877	23.581	53.79	26.763	56.818	26.68	45.289	31.018	47.385	31.199	33.407	44.753	54.187	56.437	31.555	41.741	49.737	30.527	51.369	28.88	34.349	45.617	37.153	42.645	47.483	41.097
441.06	27.591	41.132	17.313	48.218	33.336	50.87	28.15	29.398	25.791	49.672	35.155	28.413	16.041	36.643	37.534	40.582	32.651	27.064	32.895	43.986	24.149	56.554	24.886	36.059	23.785	54.041	26.893	56.948	26.767	45.438	31.143	47.552	31.28	33.566	44.92	54.375	56.58	31.688	41.829	49.868	30.568	51.563	28.99	34.488	45.79	37.235	42.864	47.784	41.39
441.5	27.816	41.349	17.379	48.449	33.423	50.952	28.229	29.493	25.961	49.839	35.389	28.51	16.163	36.773	37.739	40.739	32.779	27.176	33.053	44.126	24.316	56.806	25.107	36.246	24.011	54.346	27.058	57.081	26.873	45.598	31.248	47.733	31.355	33.652	45.082	54.498	56.677	31.756	41.896	50.002	30.62	51.721	29.032	34.612	45.919	37.322	42.981	47.981	41.682
441.94	28.025	41.471	17.442	48.671	33.519	51.066	28.377	29.536	26.121	49.931	35.508	28.593	16.248	36.906	37.897	40.839	32.88	27.303	33.179	44.209	24.453	56.947	25.334	36.396	24.227	54.559	27.217	57.156	26.958	45.723	31.316	47.92	31.431	33.819	45.242	54.691	56.801	31.82	42.001	50.11	30.656	51.856	29.089	34.684	46.069	37.45	43.164	48.215	41.923
442.38	28.235	41.666	17.52	48.901	33.618	51.167	28.499	29.615	26.334	50.018	35.672	28.755	16.376	37.022	38.111	40.939	32.975	27.418	33.35	44.344	24.629	57.103	25.496	36.575	24.464	54.767	27.364	57.279	27.053	45.871	31.393	48.054	31.492	33.93	45.418	54.851	56.94	31.904	42.091	50.239	30.682	52.045	29.16	34.771	46.222	37.583	43.409	48.417	42.157
442.81	28.478	41.875	17.593	49.101	33.735	51.216	28.601	29.683	26.519	50.165	35.86	28.86	16.478	37.216	38.342	41.049	33.097	27.546	33.52	44.484	24.856	57.358	25.701	36.726	24.712	55.013	27.491	57.349	27.147	46.053	31.438	48.15	31.525	34.026	45.552	54.926	57.061	31.94	42.129	50.272	30.644	52.174	29.197	34.841	46.24	37.649	43.482	48.576	42.298
443.25	28.758	42.051	17.642	49.326	33.859	51.355	28.647	29.756	26.638	50.3	36.043	28.969	16.574	37.239	38.546	41.198	33.239	27.676	33.676	44.593	25.01	57.568	25.866	36.889	25.001	55.196	27.621	57.457	27.267	46.161	31.537	48.315	31.576	34.106	45.694	55.064	57.124	31.984	42.19	50.379	30.68	52.358	29.258	34.953	46.361	37.753	43.626	48.76	42.5
443.69	29.001	42.24	17.713	49.554	33.992	51.43	28.747	29.804	26.805	50.417	36.216	29.066	16.694	37.301	38.746	41.307	33.351	27.786	33.877	44.68	25.175	57.782	26.028	37.075	25.287	55.398	27.816	57.471	27.387	46.285	31.584	48.431	31.633	34.163	45.836	55.168	57.228	32.039	42.246	50.476	30.657	52.467	29.319	35.016	46.457	37.797	43.742	48.977	42.638
444.13	29.284	42.473	17.804	49.849	34.143	51.525	28.814	29.92	27.021	50.635	36.431	29.179	16.786	37.401	39.037	41.454	33.427	27.895	34.099	44.852	25.41	57.944	26.227	37.313	25.647	55.723	28.021	57.621	27.466	46.395	31.661	48.516	31.704	34.237	45.965	55.29	57.271	32.078	42.255	50.557	30.66	52.592	29.307	35.058	46.42	37.851	43.85	49.18	42.708
444.57	29.555	42.699	17.855	50.123	34.255	51.615	28.904	30.004	27.231	50.78	36.714	29.303	16.877	37.554	39.328	41.523	33.56	28.023	34.399	45.043	25.614	58.123	26.421	37.517	25.934	55.958	28.156	57.699	27.544	46.553	31.735	48.619	31.754	34.347	46.156	55.428	57.388	32.129	42.344	50.608	30.641	52.783	29.311	35.121	46.484	37.922	44.008	49.402	42.762
445	29.887	42.99	17.932	50.451	34.392	51.721	28.985	30.074	27.361	50.999	36.918	29.42	16.912	37.693	39.567	41.572	33.6	28.169	34.684	45.123	25.807	58.245	26.596	37.666	26.208	56.166	28.324	57.828	27.655	46.676	31.813	48.743	31.783	34.422	46.339	55.516	57.438	32.185	42.382	50.694	30.624	52.912	29.301	35.141	46.562	37.956	44.206	49.572	42.8
445.44	30.134	43.21	17.927	50.769	34.504	51.7	29.071	30.117	27.493	51.141	37.113	29.521	16.941	37.764	39.826	41.638	33.722	28.293	34.928	45.261	26.033	58.381	26.707	37.791	26.478	56.314	28.463	57.887	27.745	46.844	31.85	48.768	31.785	34.437	46.465	55.545	57.463	32.169	42.36	50.745	30.531	52.945	29.262	35.151	46.529	37.957	44.274	49.643	42.717
445.88	30.422	43.384	17.964	50.969	34.588	51.732	29.13	30.18	27.652	51.278	37.301	29.619	16.987	37.854	40.081	41.751	33.773	28.453	35.289	45.444	26.209	58.521	26.871	37.96	26.768	56.491	28.682	57.973	27.873	46.977	31.944	48.85	31.853	34.531	46.632	55.628	57.488	32.25	42.421	50.841	30.518	53.059	29.312	35.199	46.657	38.025	44.374	49.837	42.721
446.32	30.659	43.729	18.019	51.203	34.67	51.796	29.153	30.274	27.76	51.486	37.408	29.715	16.997	37.998	40.367	41.735	33.818	28.578	35.627	45.537	26.429	58.701	27.045	38.142	27.057	56.731	28.811	58.045	27.968	47.061	32.042	48.941	31.915	34.598	46.757	55.736	57.527	32.299	42.416	50.881	30.471	53.131	29.346	35.221	46.698	38.11	44.457	49.928	42.658
446.76	30.986	43.945	18.071	51.393	34.804	51.862	29.11	30.351	27.869	51.659	37.58	29.785	16.974	38.112	40.68	41.773	33.938	28.723	35.941	45.647	26.615	58.869	27.177	38.283	27.314	56.97	28.951	58.135	28.084	47.156	32.152	49.086	31.971	34.688	46.946	55.868	57.611	32.345	42.448	50.906	30.428	53.227	29.334	35.256	46.789	38.181	44.563	50.104	42.565
447.19	31.25	44.18	18.074	51.551	34.978	51.942	29.108	30.429	27.914	51.845	37.812	29.84	16.931	38.207	40.955	41.811	34.022	28.841	36.286	45.756	26.825	58.954	27.285	38.417	27.503	57.27	29.103	58.236	28.165	47.291	32.158	49.175	31.938	34.727	47.099	55.978	57.649	32.304	42.442	50.974	30.396	53.29	29.367	35.254	46.823	38.241	44.668	50.212	42.421
447.63	31.507	44.457	18.082	51.964	35.153	52.004	29.227	30.663	28.06	52.101	38.142	30.046	16.946	38.337	41.233	42.001	34.064	28.972	36.595	45.942	27.086	59.056	27.456	38.616	27.799	57.545	29.231	58.37	28.27	47.379	32.253	49.262	31.963	34.855	47.212	56.069	57.73	32.339	42.453	51.005	30.402	53.354	29.402	35.265	46.881	38.376	44.812	50.334	42.292
448.07	31.718	44.716	18.135	52.2	35.197	52.022	29.27	30.75	28.142	52.236	38.313	30.116	16.919	38.436	41.45	42.036	34.111	29.052	36.86	46.03	27.306	59.19	27.556	38.84	27.987	57.788	29.285	58.458	28.287	47.405	32.341	49.345	31.999	34.957	47.368	56.24	57.822	32.38	42.522	51.066	30.429	53.472	29.418	35.346	47.039	38.43	44.96	50.485	42.133
448.51	31.926	44.96	18.159	52.459	35.277	52.089	29.302	30.905	28.231	52.374	38.535	30.199	16.991	38.549	41.695	42.113	34.184	29.103	37.145	46.061	27.468	59.349	27.595	38.926	28.168	57.968	29.357	58.496	28.37	47.48	32.382	49.423	32.051	35.041	47.501	56.402	57.834	32.42	42.556	51.126	30.377	53.583	29.457	35.336	47.055	38.526	45.093	50.645	41.988
448.94	31.944	44.94	18.054	52.529	35.111	51.919	29.215	30.979	28.217	52.434	38.442	30.064	16.85	38.43	41.748	42.039	34.14	29.08	37.178	45.936	27.401	59.282	27.445	38.75	28.073	58.064	29.257	58.391	28.112	47.323	32.244	49.352	31.933	34.913	47.386	56.19	57.615	32.068	42.265	50.874	30.014	53.318	29.115	34.942	46.677	38.252	44.814	50.231	41.291
449.38	32.179	45.216	18.12	52.758	35.174	51.978	29.237	31.147	28.283	52.677	38.663	30.204	16.916	38.632	42.02	42.134	34.268	29.151	37.466	46.078	27.595	59.494	27.545	38.942	28.283	58.4	29.438	58.598	28.218	47.52	32.26	49.433	31.975	35.013	47.389	56.305	57.693	32.079	42.264	50.874	30.007	53.378	29.103	34.919	46.67	38.32	44.865	50.307	41.105
449.82	32.234	45.329	18.181	52.899	35.271	51.958	29.252	31.191	28.34	52.799	38.753	30.217	16.889	38.725	42.219	42.229	34.241	29.21	37.675	46.108	27.717	59.614	27.601	39.047	28.325	58.613	29.491	58.678	28.272	47.681	32.242	49.456	32.011	35.075	47.51	56.4	57.759	32.124	42.296	50.874	30.026	53.491	29.132	34.917	46.74	38.395	44.982	50.464	40.968
450.26	32.366	45.575	18.222	53.113	35.33	51.986	29.242	31.313	28.385	53.029	38.956	30.253	16.892	38.835	42.52	42.343	34.306	29.287	37.879	46.231	27.907	59.866	27.6	39.192	28.407	58.8	29.609	58.811	28.337	47.78	32.33	49.524	32.079	35.14	47.591	56.505	57.827	32.144	42.358	50.927	30.04	53.591	29.207	34.977	46.802	38.446	45.098	50.644	40.87
450.69	32.459	45.656	18.231	53.297	35.448	52.011	29.258	31.356	28.376	53.247	39.148	30.227	16.854	38.903	42.665	42.445	34.336	29.319	38.041	46.323	27.961	59.976	27.685	39.299	28.507	59.033	29.712	58.89	28.386	47.865	32.358	49.622	32.121	35.215	47.67	56.61	57.858	32.194	42.432	51.019	30.05	53.709	29.239	35.029	46.909	38.5	45.172	50.807	40.719
451.13	32.561	45.79	18.275	53.522	35.486	52.056	29.321	31.454	28.45	53.394	39.294	30.253	16.877	38.942	42.849	42.603	34.399	29.394	38.224	46.393	28.042	60.076	27.7	39.413	28.601	59.136	29.854	58.978	28.459	47.965	32.39	49.746	32.167	35.303	47.795	56.708	57.937	32.217	42.523	51.104	30.114	53.79	29.293	35.081	47.061	38.575	45.302	50.961	40.612
451.57	32.576	45.881	18.31	53.674	35.548	52.081	29.367	31.511	28.494	53.55	39.414	30.326	16.87	39.127	43.018	42.676	34.42	29.451	38.367	46.426	28.224	60.212	27.727	39.511	28.613	59.23	29.917	59.027	28.522	48.034	32.419	49.844	32.217	35.411	47.893	56.799	58.042	32.276	42.588	51.179	30.118	53.895	29.379	35.123	47.144	38.645	45.435	51.115	40.481
452.01	32.723	46.038	18.323	53.814	35.606	52.108	29.421	31.694	28.53	53.753	39.581	30.453	16.895	39.293	43.163	42.743	34.449	29.556	38.464	46.533	28.339	60.333	27.773	39.633	28.67	59.403	30.007	59.229	28.524	48.181	32.47	49.922	32.251	35.523	47.962	56.862	58.073	32.292	42.646	51.228	30.158	53.968	29.472	35.158	47.238	38.744	45.526	51.196	40.418
452.44	32.756	46.089	18.333	53.873	35.632	52.167	29.431	31.747	28.478	53.791	39.673	30.506	16.914	39.382	43.31	42.792	34.538	29.54	38.599	46.573	28.401	60.451	27.791	39.705	28.649	59.471	30.019	59.292	28.598	48.266	32.514	50.011	32.278	35.609	47.967	56.929	58.151	32.352	42.725	51.246	30.177	54.063	29.55	35.181	47.344	38.785	45.663	51.317	40.321
452.88	32.787	46.196	18.355	53.948	35.653	52.237	29.462	31.796	28.47	53.874	39.689	30.514	16.919	39.39	43.448	42.872	34.579	29.565	38.624	46.602	28.478	60.543	27.794	39.748	28.646	59.544	30.05	59.333	28.659	48.296	32.536	50.118	32.309	35.697	48.003	56.974	58.19	32.346	42.768	51.332	30.157	54.146	29.618	35.171	47.42	38.835	45.755	51.368	40.251
453.32	32.795	46.281	18.392	53.994	35.633	52.255	29.514	31.928	28.541	53.941	39.805	30.541	16.879	39.468	43.645	42.999	34.609	29.641	38.77	46.753	28.535	60.729	27.837	39.909	28.678	59.748	30.129	59.428	28.706	48.382	32.533	50.128	32.32	35.714	48.008	56.97	58.221	32.327	42.764	51.283	30.111	54.18	29.652	35.155	47.424	38.87	45.751	51.428	40.058
453.75	32.826	46.354	18.496	54.003	35.611	52.248	29.553	31.975	28.534	53.965	39.899	30.558	16.841	39.551	43.787	43.069	34.635	29.613	38.888	46.778	28.611	60.826	27.846	40.044	28.665	59.841	30.159	59.437	28.753	48.34	32.522	50.178	32.317	35.759	48.035	57	58.247	32.347	42.757	51.285	30.101	54.226	29.704	35.167	47.457	38.912	45.823	51.501	39.935
454.19	32.793	46.524	18.553	54.145	35.673	52.358	29.614	32.14	28.49	54.039	40.005	30.599	16.871	39.616	43.928	43.139	34.642	29.62	38.94	46.858	28.686	60.979	27.881	40.125	28.683	59.96	30.181	59.521	28.812	48.454	32.505	50.227	32.292	35.814	48.018	57.076	58.288	32.322	42.763	51.225	30.08	54.297	29.737	35.155	47.496	38.957	45.863	51.56	39.767
454.63	32.754	46.485	18.599	54.168	35.758	52.414	29.622	32.232	28.406	54.04	40.056	30.566	16.909	39.677	43.988	43.217	34.664	29.611	38.989	46.924	28.676	61.068	27.836	40.135	28.601	59.879	30.18	59.52	28.818	48.516	32.452	50.28	32.286	35.856	48.055	57.109	58.335	32.28	42.818	51.193	30.08	54.352	29.787	35.165	47.522	38.935	45.931	51.68	39.626
455.07	32.625	46.58	18.609	54.232	35.799	52.419	29.671	32.265	28.325	54.062	40.086	30.598	16.895	39.794	44.092	43.252	34.639	29.662	39.054	47.029	28.678	61.103	27.75	40.192	28.568	59.91	30.248	59.564	28.811	48.572	32.441	50.283	32.268	35.927	48.083	57.099	58.324	32.275	42.89	51.231	30.081	54.383	29.841	35.185	47.549	38.964	45.992	51.74	39.485
455.5	32.57	46.557	18.628	54.216	35.813	52.462	29.753	32.304	28.266	54.161	40.097	30.686	16.947	39.86	44.18	43.311	34.668	29.634	39.109	47.091	28.722	61.201	27.715	40.277	28.518	59.904	30.293	59.588	28.898	48.623	32.455	50.301	32.321	36.004	48.134	57.132	58.356	32.32	42.935	51.235	30.069	54.396	29.851	35.202	47.601	38.97	46.05	51.856	39.341
455.94	32.505	46.66	18.744	54.158	35.805	52.427	29.68	32.244	28.087	54.154	39.989	30.678	16.959	39.952	44.318	43.305	34.742	29.702	39.147	47.079	28.759	61.29	27.626	40.31	28.483	59.872	30.282	59.625	28.97	48.65	32.427	50.297	32.352	36.038	48.174	57.175	58.404	32.338	42.933	51.245	30.046	54.437	29.937	35.221	47.624	38.943	46.076	51.955	39.206
456.38	32.489	46.702	18.763	54.21	35.873	52.478	29.688	32.383	28.043	54.265	40.07	30.731	17.012	40.001	44.501	43.39	34.825	29.743	39.255	47.265	28.822	61.475	27.665	40.409	28.494	59.963	30.323	59.714	29.077	48.728	32.423	50.291	32.383	36.113	48.169	57.178	58.445	32.349	42.883	51.271	30.017	54.474	29.991	35.177	47.66	38.957	46.052	51.994	39.052
456.81	32.495	46.766	18.856	54.278	35.929	52.525	29.716	32.47	27.966	54.372	40.12	30.768	16.998	40.159	44.649	43.432	34.873	29.825	39.37	47.459	28.904	61.589	27.704	40.547	28.491	60.108	30.403	59.844	29.145	48.835	32.411	50.329	32.352	36.126	48.132	57.163	58.527	32.368	42.883	51.264	29.986	54.484	30.004	35.183	47.676	38.951	46.07	52.036	38.891
457.25	32.494	46.908	18.849	54.36	35.99	52.588	29.747	32.507	27.922	54.423	40.158	30.77	16.985	40.26	44.73	43.445	34.898	29.9	39.469	47.585	28.935	61.711	27.691	40.668	28.443	60.099	30.462	59.933	29.186	48.842	32.399	50.312	32.311	36.141	48.105	57.088	58.506	32.334	42.841	51.21	29.911	54.477	30.027	35.154	47.634	38.924	46.119	52.074	38.756
457.69	32.427	46.943	18.919	54.401	36.055	52.64	29.759	32.542	27.88	54.45	40.27	30.798	16.977	40.248	44.782	43.566	34.938	29.916	39.534	47.683	28.896	61.692	27.639	40.658	28.335	60.053	30.441	59.973	29.245	48.893	32.412	50.319	32.345	36.188	48.173	57.067	58.545	32.309	42.863	51.226	29.94	54.547	30.087	35.189	47.676	38.947	46.173	52.163	38.619
458.12	32.438	47.017	18.913	54.446	36.119	52.691	29.816	32.687	27.859	54.522	40.349	30.898	17.035	40.256	44.953	43.549	35.02	29.989	39.609	47.875	28.968	61.833	27.644	40.731	28.348	60.111	30.515	60.011	29.327	48.949	32.425	50.3	32.365	36.262	48.153	57.085	58.62	32.3	42.867	51.254	29.936	54.567	30.153	35.229	47.717	38.94	46.183	52.24	38.495
458.56	32.43	47.052	18.929	54.476	36.127	52.704	29.86	32.808	27.82	54.582	40.4	30.986	17.089	40.327	44.995	43.632	35.042	29.945	39.712	47.955	28.992	61.858	27.631	40.83	28.326	60.172	30.555	60.101	29.378	49.037	32.413	50.291	32.369	36.285	48.161	57.073	58.643	32.349	42.877	51.267	29.931	54.609	30.198	35.239	47.764	38.979	46.247	52.264	38.379
459	32.366	47.161	18.958	54.512	36.176	52.76	29.923	32.926	27.823	54.728	40.472	31.09	17.117	40.401	45.158	43.686	35.129	30.032	39.815	48.097	29.098	61.959	27.619	40.939	28.317	60.21	30.556	60.213	29.364	49.171	32.395	50.283	32.402	36.328	48.209	57.062	58.635	32.341	42.884	51.246	29.932	54.655	30.244	35.25	47.8	39.014	46.273	52.325	38.24
459.43	32.292	47.214	18.976	54.451	36.227	52.793	29.895	32.943	27.747	54.713	40.58	31.135	17.108	40.501	45.251	43.708	35.183	30.017	39.835	48.19	29.135	62.061	27.588	40.996	28.23	60.272	30.561	60.312	29.362	49.188	32.394	50.264	32.404	36.35	48.18	57.087	58.66	32.334	42.889	51.268	29.914	54.693	30.276	35.213	47.785	39.031	46.31	52.379	38.1
459.87	32.295	47.3	19.017	54.551	36.286	52.84	29.925	33.041	27.731	54.842	40.636	31.194	17.164	40.564	45.343	43.783	35.271	30.014	39.935	48.342	29.127	62.19	27.609	41.08	28.216	60.352	30.584	60.37	29.361	49.228	32.349	50.217	32.346	36.342	48.145	57.004	58.668	32.29	42.875	51.23	29.841	54.658	30.274	35.197	47.797	39.013	46.338	52.415	37.926
460.31	32.192	47.335	19.035	54.532	36.352	52.917	29.929	33.169	27.69	54.927	40.711	31.177	17.17	40.667	45.451	43.869	35.32	30.001	40.115	48.466	29.169	62.307	27.62	41.146	28.159	60.347	30.604	60.401	29.425	49.305	32.322	50.186	32.372	36.358	48.159	57.01	58.725	32.297	42.856	51.231	29.83	54.687	30.28	35.211	47.821	39	46.407	52.485	37.753
460.74	32.155	47.349	19.081	54.631	36.446	52.955	30.02	33.277	27.68	55.029	40.811	31.189	17.181	40.742	45.563	43.935	35.371	30.069	40.186	48.591	29.229	62.399	27.601	41.24	28.109	60.388	30.61	60.456	29.43	49.352	32.326	50.149	32.356	36.421	48.196	57.003	58.764	32.292	42.832	51.223	29.793	54.706	30.319	35.227	47.86	39.011	46.413	52.534	37.638
461.18	32.113	47.434	19.07	54.739	36.54	53.009	30.039	33.392	27.659	55.152	40.918	31.226	17.207	40.839	45.61	44.007	35.434	30.097	40.308	48.716	29.268	62.548	27.625	41.313	28.049	60.545	30.613	60.617	29.451	49.458	32.32	50.097	32.362	36.445	48.227	57.013	58.827	32.294	42.813	51.218	29.776	54.696	30.338	35.235	47.908	39.047	46.446	52.613	37.505
461.62	32.057	47.44	19.096	54.765	36.575	53.076	30.076	33.482	27.601	55.237	41.019	31.261	17.252	40.909	45.659	44.037	35.522	30.097	40.354	48.784	29.324	62.578	27.596	41.375	27.99	60.506	30.61	60.665	29.47	49.503	32.301	50.142	32.371	36.498	48.246	57.076	58.892	32.294	42.831	51.255	29.789	54.71	30.401	35.279	47.997	39.066	46.503	52.709	37.409
462.05	32.007	47.488	19.074	54.843	36.676	53.236	30.09	33.629	27.616	55.35	41.13	31.308	17.319	40.924	45.77	44.097	35.587	30.144	40.415	48.894	29.384	62.65	27.589	41.438	27.969	60.53	30.663	60.779	29.481	49.611	32.303	50.148	32.373	36.542	48.275	57.075	58.946	32.312	42.875	51.243	29.782	54.734	30.434	35.297	48.051	39.089	46.527	52.783	37.289
462.49	31.991	47.539	19.12	54.903	36.745	53.326	30.115	33.69	27.611	55.506	41.24	31.348	17.345	41.024	45.907	44.166	35.667	30.159	40.546	49.036	29.439	62.769	27.573	41.5	27.952	60.576	30.708	60.92	29.53	49.692	32.3	50.141	32.396	36.588	48.297	57.055	58.987	32.329	42.913	51.238	29.786	54.732	30.469	35.308	48.089	39.127	46.564	52.852	37.167
462.93	32.012	47.605	19.164	54.941	36.789	53.451	30.172	33.793	27.648	55.645	41.338	31.41	17.387	41.111	46.018	44.271	35.731	30.203	40.651	49.171	29.557	62.906	27.573	41.632	27.927	60.758	30.785	61.033	29.608	49.798	32.286	50.069	32.411	36.67	48.301	57.062	58.985	32.339	42.917	51.273	29.78	54.706	30.452	35.297	48.146	39.155	46.594	52.891	37.069
463.36	31.977	47.694	19.205	55.016	36.814	53.569	30.202	33.938	27.672	55.761	41.468	31.439	17.432	41.161	46.147	44.347	35.802	30.227	40.715	49.294	29.661	63.06	27.604	41.686	27.901	60.814	30.812	61.17	29.649	49.913	32.283	50.072	32.424	36.717	48.294	57.055	59.06	32.304	42.916	51.229	29.772	54.737	30.5	35.295	48.207	39.177	46.649	52.951	37.019
463.8	31.975	47.829	19.244	55.148	36.884	53.627	30.198	34.072	27.712	55.818	41.601	31.559	17.502	41.245	46.305	44.476	35.853	30.281	40.785	49.417	29.738	63.191	27.677	41.819	27.934	60.834	30.848	61.301	29.646	49.971	32.26	50.048	32.419	36.726	48.304	57.054	59.074	32.292	42.912	51.198	29.749	54.793	30.55	35.282	48.253	39.188	46.681	53.021	36.922
464.23	31.943	47.876	19.243	55.154	36.95	53.653	30.231	34.186	27.702	55.889	41.659	31.61	17.54	41.33	46.359	44.55	35.86	30.251	40.849	49.44	29.807	63.291	27.678	41.867	27.888	60.859	30.907	61.398	29.626	50.051	32.255	50.061	32.414	36.798	48.312	57.023	59.149	32.306	42.945	51.204	29.723	54.816	30.565	35.282	48.318	39.211	46.707	53.06	36.837
464.67	31.885	47.918	19.273	55.189	36.996	53.766	30.286	34.253	27.668	55.993	41.742	31.631	17.551	41.436	46.426	44.573	35.907	30.264	40.852	49.507	29.851	63.391	27.634	41.947	27.871	60.896	30.966	61.472	29.569	50.142	32.236	50.066	32.392	36.837	48.293	56.989	59.168	32.281	42.951	51.19	29.715	54.825	30.593	35.304	48.317	39.227	46.77	53.12	36.753
465.11	31.848	48.017	19.323	55.269	37.048	53.798	30.338	34.349	27.671	56.089	41.854	31.702	17.612	41.442	46.513	44.673	35.939	30.281	40.949	49.593	29.902	63.511	27.614	41.977	27.874	60.947	30.993	61.565	29.565	50.192	32.209	50.027	32.392	36.898	48.3	56.944	59.198	32.249	42.95	51.195	29.717	54.849	30.644	35.313	48.302	39.254	46.766	53.171	36.685
465.54	31.814	48.035	19.403	55.292	37.135	53.89	30.374	34.453	27.671	56.177	41.973	31.746	17.625	41.488	46.638	44.828	35.983	30.272	41.042	49.712	30.007	63.629	27.657	42.066	27.885	60.987	31.018	61.594	29.607	50.247	32.214	50.021	32.421	36.947	48.315	56.971	59.228	32.255	42.959	51.189	29.722	54.915	30.665	35.32	48.357	39.288	46.809	53.256	36.599
465.98	31.79	48.058	19.381	55.344	37.205	53.99	30.419	34.525	27.699	56.233	42.009	31.778	17.641	41.571	46.709	44.835	35.991	30.334	41.119	49.78	30.093	63.739	27.682	42.184	27.888	61.042	31.036	61.661	29.579	50.296	32.173	50.043	32.405	36.969	48.328	56.975	59.271	32.268	43.007	51.188	29.682	54.882	30.694	35.341	48.393	39.313	46.848	53.34	36.541
466.41	31.805	48.08	19.426	55.455	37.242	54.094	30.465	34.629	27.689	56.37	42.116	31.808	17.66	41.707	46.779	44.999	36.065	30.377	41.191	49.875	30.168	63.835	27.661	42.314	27.9	61.143	31.071	61.874	29.605	50.353	32.139	50.04	32.403	37.019	48.374	56.952	59.289	32.273	43.035	51.191	29.641	54.917	30.709	35.353	48.431	39.33	46.893	53.428	36.466
466.85	31.789	48.147	19.46	55.496	37.345	54.245	30.523	34.724	27.711	56.423	42.209	31.856	17.665	41.762	46.917	45.066	36.101	30.443	41.245	49.967	30.222	63.945	27.678	42.361	27.891	61.183	31.093	61.932	29.616	50.451	32.119	50.026	32.384	37.045	48.377	56.94	59.335	32.229	43.024	51.152	29.597	54.902	30.741	35.313	48.446	39.308	46.873	53.49	36.371
467.29	31.792	48.16	19.52	55.548	37.398	54.366	30.548	34.852	27.697	56.465	42.295	31.923	17.701	41.828	47.014	45.111	36.095	30.489	41.299	50.053	30.292	64.006	27.701	42.5	27.873	61.202	31.172	61.941	29.674	50.524	32.07	50.022	32.363	37.056	48.332	56.912	59.362	32.202	43.013	51.117	29.557	54.853	30.745	35.32	48.44	39.267	46.892	53.512	36.308
467.72	31.791	48.186	19.545	55.636	37.465	54.53	30.594	34.949	27.697	56.61	42.338	31.991	17.724	41.842	47.086	45.175	36.124	30.554	41.365	50.162	30.305	64.116	27.726	42.603	27.851	61.271	31.19	62.052	29.701	50.554	32.036	50.027	32.382	37.125	48.326	56.898	59.386	32.194	43.008	51.067	29.535	54.859	30.776	35.359	48.464	39.271	46.922	53.582	36.213
468.16	31.782	48.201	19.556	55.616	37.453	54.632	30.606	35.016	27.662	56.632	42.432	31.977	17.736	41.891	47.147	45.196	36.115	30.607	41.44	50.217	30.344	64.139	27.682	42.646	27.806	61.299	31.207	62.116	29.738	50.625	32.038	50.004	32.403	37.16	48.334	56.894	59.4	32.188	42.992	51.034	29.512	54.843	30.818	35.364	48.468	39.282	46.925	53.633	36.13
468.59	31.779	48.244	19.572	55.652	37.503	54.71	30.644	35.029	27.634	56.675	42.499	32.049	17.753	41.98	47.208	45.232	36.147	30.635	41.483	50.316	30.348	64.26	27.688	42.689	27.808	61.378	31.227	62.18	29.75	50.654	32.011	49.997	32.399	37.217	48.336	56.892	59.444	32.135	43.018	51.007	29.489	54.836	30.856	35.353	48.474	39.289	46.91	53.662	36.065
469.03	31.785	48.356	19.608	55.679	37.548	54.81	30.677	35.128	27.627	56.77	42.547	32.173	17.776	42.05	47.327	45.322	36.19	30.661	41.612	50.438	30.382	64.334	27.702	42.705	27.818	61.455	31.279	62.258	29.79	50.733	31.978	50.047	32.442	37.262	48.337	56.893	59.466	32.113	43.046	51.045	29.475	54.835	30.894	35.363	48.514	39.317	46.937	53.748	35.972
469.46	31.809	48.364	19.694	55.692	37.585	54.93	30.714	35.215	27.64	56.83	42.651	32.276	17.796	42.156	47.418	45.365	36.215	30.69	41.657	50.49	30.457	64.38	27.752	42.825	27.854	61.454	31.331	62.288	29.826	50.78	31.96	50.044	32.428	37.289	48.333	56.86	59.438	32.08	43.022	51.003	29.445	54.837	30.919	35.347	48.523	39.267	46.912	53.778	35.895
469.9	31.789	48.412	19.73	55.688	37.676	54.994	30.746	35.267	27.623	56.881	42.736	32.31	17.785	42.173	47.545	45.421	36.217	30.763	41.724	50.549	30.475	64.446	27.762	42.916	27.82	61.507	31.377	62.328	29.809	50.815	31.935	49.961	32.42	37.317	48.316	56.801	59.427	32.048	43.023	50.961	29.404	54.802	30.917	35.311	48.515	39.239	46.892	53.804	35.788
470.34	31.805	48.433	19.756	55.732	37.682	54.989	30.808	35.288	27.58	56.971	42.75	32.335	17.777	42.27	47.634	45.472	36.205	30.783	41.723	50.595	30.474	64.478	27.754	42.989	27.775	61.543	31.371	62.316	29.824	50.818	31.887	49.912	32.396	37.338	48.275	56.814	59.434	32.009	42.976	50.929	29.363	54.77	30.918	35.263	48.5	39.178	46.904	53.84	35.692
470.77	31.845	48.458	19.774	55.719	37.748	55.058	30.817	35.354	27.555	57.033	42.836	32.413	17.836	42.335	47.701	45.497	36.251	30.809	41.718	50.641	30.545	64.488	27.803	43.078	27.751	61.583	31.366	62.322	29.848	50.869	31.842	49.882	32.37	37.353	48.274	56.812	59.439	31.964	42.925	50.927	29.331	54.777	30.941	35.242	48.545	39.14	46.887	53.881	35.644
471.21	31.802	48.459	19.772	55.774	37.793	55.107	30.858	35.405	27.539	57.11	42.901	32.454	17.809	42.362	47.736	45.507	36.273	30.794	41.708	50.717	30.556	64.487	27.81	43.12	27.702	61.572	31.366	62.369	29.836	50.863	31.814	49.873	32.334	37.381	48.261	56.751	59.449	31.916	42.874	50.834	29.262	54.753	30.958	35.211	48.559	39.11	46.844	53.92	35.515
471.64	31.858	48.485	19.802	55.78	37.834	55.204	30.897	35.499	27.55	57.197	43.012	32.514	17.834	42.415	47.816	45.6	36.318	30.784	41.729	50.806	30.588	64.511	27.818	43.226	27.694	61.624	31.379	62.379	29.873	50.895	31.774	49.851	32.302	37.394	48.251	56.746	59.471	31.912	42.837	50.83	29.205	54.742	30.931	35.189	48.561	39.092	46.828	53.965	35.395
472.08	31.831	48.457	19.809	55.743	37.875	55.25	30.932	35.553	27.51	57.234	43.037	32.475	17.815	42.417	47.869	45.592	36.35	30.767	41.804	50.867	30.621	64.573	27.806	43.214	27.606	61.591	31.392	62.382	29.861	50.907	31.729	49.814	32.276	37.43	48.199	56.714	59.477	31.866	42.793	50.769	29.148	54.709	30.941	35.144	48.561	39.061	46.805	53.972	35.284
472.51	31.873	48.468	19.851	55.812	37.91	55.35	30.938	35.631	27.522	57.297	43.147	32.543	17.821	42.502	48.055	45.65	36.414	30.798	41.852	51.06	30.687	64.653	27.823	43.338	27.618	61.69	31.435	62.431	29.895	50.987	31.705	49.788	32.256	37.443	48.188	56.714	59.486	31.818	42.773	50.758	29.119	54.702	30.987	35.124	48.551	39.041	46.784	54.047	35.168
472.95	31.898	48.508	19.882	55.839	37.948	55.347	30.952	35.706	27.494	57.337	43.211	32.594	17.827	42.554	48.157	45.711	36.416	30.829	41.921	51.126	30.717	64.656	27.822	43.421	27.581	61.7	31.386	62.459	29.981	51.042	31.656	49.759	32.245	37.447	48.18	56.71	59.507	31.774	42.775	50.674	29.035	54.647	30.995	35.101	48.568	39.028	46.799	54.113	35.06
473.38	31.907	48.474	19.878	55.856	37.999	55.433	30.956	35.771	27.513	57.327	43.289	32.621	17.81	42.643	48.271	45.717	36.404	30.836	41.939	51.153	30.72	64.704	27.814	43.463	27.519	61.693	31.376	62.535	30.035	51.034	31.601	49.72	32.223	37.459	48.202	56.707	59.52	31.74	42.772	50.641	28.979	54.615	31.01	35.072	48.604	39.01	46.829	54.165	34.952
473.82	31.91	48.518	19.86	55.829	37.929	55.434	30.943	35.834	27.478	57.365	43.328	32.638	17.817	42.669	48.317	45.694	36.42	30.858	41.923	51.14	30.711	64.722	27.792	43.485	27.432	61.687	31.364	62.629	30.051	51.059	31.547	49.736	32.19	37.475	48.205	56.687	59.555	31.717	42.772	50.618	28.934	54.548	31.021	35.058	48.617	38.988	46.818	54.181	34.872
474.25	31.899	48.58	19.9	55.796	37.957	55.487	30.98	35.933	27.419	57.428	43.414	32.708	17.82	42.751	48.412	45.761	36.49	30.846	41.957	51.21	30.768	64.744	27.791	43.521	27.388	61.726	31.39	62.623	30.077	51.066	31.532	49.71	32.177	37.493	48.172	56.634	59.59	31.666	42.713	50.583	28.897	54.556	31.05	35.015	48.643	38.942	46.796	54.196	34.767
474.69	31.855	48.633	19.91	55.757	37.987	55.515	30.991	35.976	27.415	57.392	43.468	32.725	17.823	42.802	48.521	45.716	36.496	30.827	41.949	51.24	30.773	64.772	27.787	43.54	27.331	61.7	31.401	62.571	30.053	51.07	31.497	49.695	32.147	37.507	48.146	56.617	59.603	31.619	42.674	50.532	28.844	54.54	31.06	34.965	48.633	38.928	46.792	54.202	34.686
475.12	31.825	48.624	19.911	55.759	37.99	55.481	30.966	36.032	27.352	57.451	43.536	32.721	17.841	42.871	48.573	45.739	36.502	30.845	41.922	51.318	30.792	64.818	27.794	43.59	27.297	61.667	31.415	62.546	30.049	51.001	31.462	49.676	32.131	37.568	48.15	56.635	59.667	31.621	42.662	50.506	28.814	54.551	31.078	34.979	48.682	38.931	46.847	54.252	34.59
475.56	31.817	48.628	19.912	55.756	37.989	55.516	31.008	36.041	27.311	57.436	43.586	32.736	17.839	42.921	48.631	45.742	36.522	30.811	41.94	51.341	30.785	64.948	27.757	43.562	27.235	61.676	31.378	62.586	30.023	50.972	31.467	49.678	32.126	37.633	48.153	56.636	59.738	31.598	42.652	50.496	28.764	54.572	31.123	34.944	48.731	38.944	46.884	54.323	34.492
475.99	31.792	48.649	19.969	55.747	38.021	55.526	31.023	36.159	27.33	57.428	43.673	32.73	17.865	42.994	48.698	45.777	36.527	30.813	41.971	51.36	30.809	64.994	27.738	43.588	27.205	61.661	31.345	62.593	30.038	50.97	31.437	49.648	32.079	37.649	48.165	56.617	59.769	31.575	42.62	50.507	28.726	54.532	31.122	34.942	48.778	38.933	46.907	54.401	34.428
476.43	31.776	48.665	19.965	55.785	38.051	55.583	31.044	36.231	27.342	57.47	43.75	32.753	17.852	43.031	48.762	45.806	36.508	30.812	41.975	51.382	30.819	65.058	27.75	43.584	27.165	61.648	31.337	62.652	30.017	50.998	31.416	49.659	32.096	37.724	48.173	56.601	59.814	31.582	42.635	50.514	28.727	54.554	31.152	34.928	48.821	38.935	46.952	54.503	34.397
476.86	31.816	48.716	20.034	55.869	38.072	55.639	31.058	36.342	27.357	57.533	43.857	32.799	17.881	43.054	48.879	45.854	36.545	30.852	41.998	51.403	30.87	65.092	27.75	43.681	27.151	61.687	31.363	62.696	30.026	51.052	31.4	49.636	32.065	37.749	48.17	56.588	59.834	31.587	42.61	50.46	28.683	54.559	31.17	34.915	48.848	38.922	46.999	54.598	34.353
477.3	31.804	48.727	20.036	55.898	38.095	55.666	31.04	36.397	27.351	57.558	43.944	32.783	17.882	43.086	48.903	45.897	36.536	30.849	41.957	51.429	30.877	65.152	27.75	43.759	27.119	61.646	31.36	62.69	30.05	51.04	31.378	49.589	32.011	37.776	48.164	56.53	59.85	31.546	42.586	50.396	28.65	54.541	31.176	34.901	48.852	38.886	46.968	54.637	34.305
477.73	31.787	48.724	20.044	55.854	38.083	55.628	31.024	36.476	27.312	57.583	43.974	32.729	17.893	43.079	48.991	45.935	36.53	30.862	41.973	51.506	30.83	65.164	27.71	43.777	27.088	61.591	31.35	62.676	30.065	50.98	31.341	49.581	31.997	37.818	48.142	56.475	59.895	31.524	42.576	50.341	28.616	54.531	31.179	34.912	48.884	38.892	46.993	54.726	34.234
478.17	31.811	48.751	20.074	55.911	38.118	55.636	31.025	36.577	27.322	57.577	43.992	32.75	17.917	43.18	49.031	45.956	36.582	30.853	41.997	51.573	30.874	65.217	27.719	43.776	27.116	61.586	31.322	62.693	30.069	50.987	31.314	49.582	31.973	37.881	48.168	56.469	59.911	31.486	42.555	50.319	28.578	54.537	31.211	34.905	48.904	38.877	47.019	54.817	34.214
478.6	31.846	48.809	20.132	55.879	38.147	55.704	31.016	36.683	27.319	57.556	44.095	32.776	17.938	43.237	49.108	46.014	36.645	30.873	42.104	51.649	30.93	65.255	27.747	43.82	27.163	61.593	31.366	62.755	30.095	51.071	31.269	49.546	31.983	37.938	48.169	56.376	59.941	31.452	42.562	50.249	28.516	54.534	31.231	34.912	48.911	38.866	47.028	54.852	34.19
479.04	31.823	48.849	20.159	55.907	38.171	55.711	31.06	36.757	27.321	57.553	44.11	32.786	17.896	43.271	49.182	46.095	36.649	30.934	42.154	51.705	30.93	65.322	27.739	43.888	27.149	61.626	31.394	62.823	30.09	51.045	31.25	49.531	31.977	37.999	48.164	56.349	59.996	31.427	42.56	50.207	28.471	54.531	31.243	34.906	48.874	38.864	47.065	54.935	34.145
479.47	31.857	48.939	20.21	55.912	38.204	55.713	31.07	36.825	27.315	57.583	44.217	32.827	17.938	43.277	49.311	46.183	36.69	30.96	42.273	51.75	30.963	65.407	27.754	43.935	27.204	61.644	31.423	62.825	30.12	51.108	31.249	49.538	31.994	38.05	48.171	56.331	60.036	31.434	42.573	50.232	28.463	54.576	31.318	34.946	48.897	38.863	47.121	55.043	34.171
479.91	31.878	48.95	20.238	55.938	38.258	55.703	31.086	36.944	27.284	57.558	44.255	32.819	17.968	43.318	49.371	46.18	36.732	30.997	42.32	51.749	30.973	65.489	27.767	43.996	27.218	61.666	31.444	62.914	30.138	51.13	31.214	49.502	32.003	38.113	48.154	56.257	60.049	31.382	42.535	50.204	28.424	54.558	31.353	34.925	48.91	38.839	47.125	55.074	34.149
480.34	31.874	48.974	20.294	55.975	38.282	55.746	31.088	37.056	27.315	57.591	44.339	32.829	17.979	43.359	49.408	46.205	36.747	31.022	42.314	51.773	30.996	65.499	27.746	44.051	27.277	61.7	31.449	62.888	30.138	51.185	31.191	49.48	31.998	38.151	48.155	56.215	60.078	31.358	42.533	50.199	28.394	54.538	31.389	34.918	48.913	38.821	47.126	55.146	34.145
480.78	31.872	49.058	20.321	55.983	38.321	55.807	31.131	37.156	27.318	57.622	44.402	32.812	17.998	43.376	49.437	46.177	36.789	31.07	42.35	51.791	31.003	65.541	27.801	44.108	27.263	61.689	31.44	62.921	30.171	51.206	31.109	49.429	31.974	38.176	48.123	56.124	60.073	31.31	42.48	50.126	28.334	54.489	31.373	34.885	48.915	38.795	47.129	55.142	34.11
481.21	31.856	49.086	20.353	55.965	38.37	55.841	31.165	37.236	27.35	57.594	44.447	32.81	18.024	43.373	49.478	46.16	36.773	31.112	42.349	51.807	31.011	65.54	27.833	44.091	27.297	61.633	31.486	62.893	30.187	51.2	31.088	49.432	31.974	38.251	48.134	56.071	60.095	31.285	42.459	50.133	28.292	54.524	31.403	34.88	48.945	38.787	47.136	55.211	34.12
481.65	31.903	49.241	20.41	55.995	38.368	55.905	31.231	37.366	27.392	57.726	44.561	32.862	18.043	43.377	49.548	46.231	36.879	31.172	42.393	51.94	31.096	65.615	27.926	44.177	27.368	61.716	31.552	62.852	30.201	51.27	31.067	49.421	31.959	38.318	48.098	56.026	60.105	31.249	42.422	50.105	28.244	54.506	31.39	34.882	48.97	38.748	47.129	55.251	34.109
482.08	31.891	49.3	20.489	56.074	38.508	55.99	31.291	37.504	27.412	57.757	44.685	32.934	18.093	43.451	49.654	46.279	36.967	31.238	42.495	52.034	31.179	65.717	28.006	44.233	27.455	61.793	31.607	62.869	30.224	51.302	31.016	49.355	31.971	38.398	48.087	55.962	60.131	31.218	42.378	50.051	28.19	54.487	31.429	34.867	48.96	38.733	47.135	55.317	34.095
482.51	31.938	49.387	20.556	56.145	38.552	56.022	31.316	37.628	27.455	57.8	44.766	32.945	18.124	43.488	49.76	46.353	36.967	31.288	42.547	52.077	31.198	65.836	28.045	44.233	27.523	61.785	31.659	62.912	30.275	51.327	30.946	49.3	31.975	38.458	48.087	55.904	60.115	31.194	42.344	49.976	28.134	54.455	31.43	34.855	48.948	38.736	47.141	55.393	34.079
482.95	31.974	49.422	20.618	56.167	38.603	56.085	31.323	37.754	27.46	57.839	44.859	32.961	18.138	43.49	49.783	46.444	37.017	31.359	42.623	52.145	31.227	65.834	28.107	44.27	27.575	61.787	31.681	62.939	30.309	51.373	30.907	49.263	31.974	38.514	48.05	55.834	60.135	31.155	42.327	49.936	28.068	54.419	31.449	34.855	48.971	38.699	47.185	55.459	34.031
483.38	32.05	49.507	20.681	56.271	38.686	56.215	31.351	37.915	27.542	57.892	44.949	33.03	18.157	43.539	49.86	46.514	37.087	31.41	42.757	52.222	31.261	65.912	28.151	44.38	27.623	61.854	31.746	63.063	30.361	51.485	30.846	49.222	31.945	38.542	47.991	55.706	60.136	31.076	42.276	49.872	28.006	54.344	31.445	34.821	48.939	38.632	47.125	55.519	34.011
483.82	32.104	49.613	20.734	56.335	38.791	56.271	31.356	38.135	27.62	57.986	45.067	33.049	18.203	43.606	49.939	46.648	37.154	31.482	42.861	52.319	31.309	65.947	28.224	44.43	27.707	61.928	31.812	63.104	30.439	51.538	30.78	49.168	31.93	38.587	47.998	55.623	60.118	31.017	42.223	49.815	27.948	54.297	31.445	34.817	48.93	38.555	47.074	55.574	34.012
484.25	32.161	49.7	20.776	56.39	38.819	56.307	31.332	38.293	27.646	57.992	45.14	33.145	18.178	43.639	50.008	46.706	37.215	31.524	42.934	52.413	31.338	65.957	28.25	44.479	27.782	61.949	31.87	63.071	30.478	51.624	30.724	49.104	31.916	38.633	47.954	55.535	60.132	30.958	42.207	49.707	27.854	54.285	31.489	34.745	48.912	38.515	47.031	55.569	34.019
484.69	32.226	49.845	20.904	56.399	38.889	56.316	31.363	38.467	27.666	58.037	45.228	33.201	18.21	43.669	50.121	46.814	37.294	31.565	42.999	52.475	31.355	65.988	28.308	44.577	27.868	62.002	31.942	63.022	30.52	51.636	30.642	49.04	31.883	38.662	47.937	55.46	60.143	30.862	42.141	49.609	27.742	54.223	31.475	34.727	48.89	38.455	46.956	55.539	33.973
485.12	32.26	49.918	20.963	56.422	39.001	56.373	31.415	38.622	27.703	58.024	45.325	33.223	18.186	43.723	50.193	46.927	37.385	31.608	43.026	52.59	31.392	66.079	28.386	44.633	27.945	62.007	31.964	63.106	30.58	51.677	30.576	48.987	31.853	38.688	47.885	55.333	60.127	30.755	42.068	49.563	27.653	54.152	31.476	34.67	48.854	38.386	46.894	55.551	33.913
485.55	32.365	50.047	21.085	56.527	39.084	56.504	31.524	38.869	27.776	58.122	45.45	33.254	18.232	43.799	50.359	47.007	37.493	31.7	43.161	52.7	31.497	66.182	28.529	44.707	28.047	62.115	32.017	63.213	30.645	51.798	30.479	48.907	31.835	38.733	47.835	55.253	60.123	30.685	42.003	49.474	27.557	54.112	31.46	34.603	48.835	38.343	46.916	55.566	33.864
485.99	32.517	50.22	21.197	56.658	39.225	56.664	31.61	39.115	27.909	58.255	45.548	33.393	18.268	43.939	50.459	47.153	37.569	31.779	43.282	52.844	31.62	66.317	28.607	44.796	28.12	62.246	32.139	63.318	30.699	51.912	30.41	48.815	31.79	38.753	47.814	55.162	60.106	30.607	41.968	49.398	27.454	54.028	31.502	34.532	48.778	38.249	46.868	55.565	33.837
486.42	32.598	50.378	21.273	56.768	39.302	56.818	31.691	39.339	27.967	58.36	45.725	33.476	18.298	43.971	50.616	47.302	37.61	31.84	43.375	52.955	31.727	66.427	28.675	44.853	28.155	62.338	32.248	63.427	30.83	52.058	30.323	48.766	31.763	38.768	47.751	55.043	60.112	30.566	41.892	49.309	27.358	53.972	31.481	34.492	48.75	38.213	46.83	55.541	33.772
486.86	32.625	50.456	21.357	56.854	39.429	56.921	31.717	39.554	28.022	58.446	45.825	33.56	18.352	44.009	50.708	47.383	37.651	31.875	43.429	53.035	31.732	66.593	28.744	44.88	28.198	62.408	32.296	63.439	30.885	52.097	30.279	48.752	31.733	38.829	47.741	55.025	60.161	30.517	41.834	49.31	27.293	53.95	31.499	34.462	48.775	38.202	46.82	55.608	33.731
487.29	32.719	50.512	21.448	56.901	39.525	57.01	31.746	39.808	28.14	58.513	45.978	33.588	18.432	44.107	50.813	47.498	37.756	31.917	43.538	53.143	31.803	66.648	28.796	44.901	28.246	62.412	32.379	63.416	30.915	52.198	30.23	48.718	31.726	38.891	47.724	54.944	60.169	30.491	41.79	49.245	27.195	53.891	31.531	34.447	48.809	38.164	46.805	55.633	33.691
487.72	32.807	50.637	21.548	56.981	39.596	57.187	31.775	40.101	28.231	58.567	46.13	33.712	18.467	44.279	50.921	47.633	37.854	32.01	43.587	53.283	31.88	66.729	28.909	44.945	28.291	62.464	32.481	63.473	30.973	52.311	30.133	48.646	31.66	38.908	47.688	54.865	60.149	30.431	41.704	49.119	27.089	53.823	31.485	34.372	48.779	38.093	46.757	55.594	33.609
488.16	32.864	50.784	21.678	57.039	39.729	57.315	31.841	40.289	28.322	58.688	46.235	33.838	18.477	44.39	51.048	47.751	37.94	32.079	43.69	53.423	31.949	66.776	29.012	44.955	28.347	62.517	32.592	63.466	31.017	52.388	30.079	48.59	31.62	38.929	47.679	54.798	60.085	30.389	41.698	49.025	26.995	53.753	31.502	34.354	48.757	38.02	46.7	55.655	33.561
488.59	32.948	50.928	21.771	57.145	39.86	57.453	31.914	40.531	28.371	58.758	46.346	33.962	18.521	44.524	51.211	47.935	38.029	32.17	43.774	53.557	31.994	66.904	29.132	45.028	28.406	62.615	32.71	63.544	31.129	52.457	30.022	48.539	31.592	38.994	47.65	54.709	60.095	30.33	41.657	48.941	26.904	53.678	31.5	34.354	48.756	37.968	46.731	55.691	33.527
489.03	33.064	51.02	21.887	57.215	39.929	57.559	31.906	40.77	28.476	58.865	46.422	34.092	18.555	44.634	51.292	48.129	38.131	32.239	43.893	53.606	32.077	67.037	29.168	45.024	28.558	62.619	32.81	63.597	31.173	52.545	29.983	48.491	31.581	39.039	47.656	54.656	60.069	30.294	41.618	48.863	26.799	53.636	31.508	34.311	48.754	37.88	46.733	55.756	33.486
489.46	33.216	51.207	22.033	57.366	40.019	57.73	31.982	41.062	28.612	58.979	46.583	34.226	18.608	44.757	51.495	48.344	38.303	32.271	44.084	53.76	32.198	67.153	29.278	45.112	28.651	62.735	32.918	63.752	31.24	52.639	29.904	48.401	31.534	39.097	47.62	54.573	60.071	30.259	41.567	48.801	26.74	53.556	31.518	34.272	48.736	37.792	46.694	55.782	33.443
489.89	33.277	51.263	22.123	57.401	40.132	57.842	32.006	41.309	28.643	58.964	46.594	34.272	18.618	44.866	51.62	48.495	38.373	32.315	44.125	53.767	32.209	67.175	29.296	45.125	28.654	62.681	32.948	63.814	31.242	52.696	29.847	48.33	31.501	39.12	47.584	54.477	60.03	30.189	41.536	48.676	26.642	53.496	31.534	34.214	48.714	37.709	46.68	55.813	33.375
490.33	33.441	51.44	22.23	57.524	40.23	57.932	32.087	41.593	28.784	59.034	46.672	34.329	18.634	45.023	51.76	48.662	38.454	32.37	44.209	53.946	32.241	67.241	29.318	45.219	28.714	62.742	32.976	63.904	31.308	52.887	29.776	48.234	31.438	39.136	47.535	54.358	59.997	30.097	41.499	48.582	26.539	53.424	31.515	34.155	48.739	37.607	46.642	55.828	33.317
490.76	33.573	51.55	22.34	57.638	40.376	58.075	32.134	41.925	28.873	59.155	46.783	34.44	18.697	45.168	51.874	48.834	38.586	32.479	44.362	54.136	32.337	67.315	29.382	45.345	28.808	62.881	33.038	64.037	31.353	53.039	29.718	48.157	31.37	39.192	47.523	54.261	59.98	30.021	41.47	48.499	26.433	53.347	31.528	34.107	48.708	37.491	46.59	55.832	33.249
491.19	33.742	51.747	22.456	57.787	40.5	58.175	32.216	42.221	28.984	59.268	46.843	34.551	18.717	45.309	52.009	49.015	38.667	32.479	44.46	54.248	32.416	67.433	29.446	45.44	28.892	62.925	33.141	64.077	31.396	53.115	29.635	48.091	31.329	39.237	47.477	54.18	59.938	29.937	41.427	48.388	26.354	53.307	31.537	34.033	48.721	37.397	46.496	55.836	33.212
491.63	33.86	51.927	22.611	57.911	40.626	58.306	32.312	42.568	29.075	59.415	46.948	34.655	18.79	45.452	52.156	49.213	38.772	32.545	44.569	54.384	32.559	67.528	29.53	45.464	29.029	63.021	33.168	64.132	31.461	53.251	29.553	48.014	31.291	39.282	47.454	54.108	59.86	29.867	41.381	48.316	26.248	53.244	31.522	33.972	48.687	37.33	46.474	55.837	33.162
492.06	34.007	52.095	22.743	58.059	40.755	58.451	32.391	42.84	29.164	59.525	47.046	34.761	18.814	45.601	52.312	49.435	38.911	32.624	44.712	54.476	32.694	67.651	29.639	45.582	29.115	63.087	33.272	64.227	31.514	53.421	29.445	47.901	31.226	39.336	47.385	53.992	59.861	29.841	41.333	48.215	26.157	53.185	31.531	33.899	48.655	37.277	46.446	55.85	33.105
492.49	34.169	52.291	22.891	58.263	40.956	58.637	32.565	43.16	29.315	59.768	47.213	34.846	18.907	45.834	52.531	49.72	39.074	32.722	44.916	54.638	32.885	67.843	29.814	45.72	29.253	63.28	33.418	64.378	31.617	53.611	29.335	47.828	31.165	39.352	47.365	53.858	59.817	29.746	41.222	48.104	26.033	53.074	31.512	33.866	48.62	37.161	46.413	55.852	33.01
492.93	34.353	52.474	23.006	58.435	41.148	58.861	32.688	43.539	29.488	59.832	47.336	35.009	19.015	46.026	52.707	49.942	39.286	32.822	45.056	54.826	33.073	68.05	29.979	45.868	29.362	63.409	33.571	64.587	31.735	53.819	29.228	47.743	31.127	39.393	47.305	53.745	59.781	29.674	41.192	48.024	25.91	53.022	31.486	33.797	48.619	37.06	46.396	55.887	32.949
493.36	34.499	52.65	23.109	58.492	41.212	58.995	32.732	43.898	29.637	59.932	47.362	35.105	19.122	46.13	52.858	50.125	39.344	32.867	45.175	54.937	33.132	68.066	30.032	45.942	29.393	63.452	33.652	64.606	31.813	53.895	29.161	47.711	31.107	39.459	47.313	53.658	59.771	29.667	41.177	47.958	25.831	52.983	31.501	33.757	48.662	37.035	46.377	55.941	32.93
493.79	34.597	52.795	23.225	58.535	41.289	59.028	32.769	44.184	29.738	59.962	47.485	35.231	19.162	46.269	52.956	50.306	39.452	32.918	45.286	55.014	33.219	68.145	30.04	46.017	29.448	63.468	33.753	64.611	31.878	53.937	29.097	47.646	31.093	39.49	47.307	53.549	59.778	29.611	41.128	47.89	25.747	52.928	31.537	33.733	48.663	36.962	46.369	56.01	32.876
494.23	34.661	52.916	23.342	58.635	41.436	59.164	32.89	44.473	29.813	60.024	47.561	35.284	19.202	46.373	53.163	50.492	39.604	32.983	45.375	55.045	33.332	68.227	30.156	46.012	29.591	63.534	33.826	64.7	31.944	54.117	28.997	47.578	31.029	39.558	47.247	53.476	59.788	29.548	41.034	47.844	25.646	52.873	31.515	33.676	48.673	36.901	46.373	56.055	32.825
494.66	34.796	53.036	23.471	58.713	41.528	59.292	32.919	44.782	29.936	60.135	47.654	35.405	19.247	46.524	53.267	50.669	39.714	33.051	45.506	55.163	33.38	68.308	30.279	46.12	29.747	63.614	33.88	64.803	31.963	54.222	28.881	47.484	30.976	39.609	47.211	53.317	59.774	29.445	40.967	47.722	25.521	52.783	31.509	33.616	48.656	36.77	46.313	56.075	32.761
495.09	34.965	53.243	23.607	58.87	41.637	59.489	33.043	45.176	30.13	60.356	47.803	35.528	19.317	46.718	53.491	50.906	39.862	33.126	45.627	55.3	33.509	68.413	30.362	46.227	29.863	63.673	33.95	64.912	32.014	54.345	28.755	47.36	30.909	39.63	47.144	53.141	59.674	29.332	40.847	47.572	25.383	52.662	31.472	33.524	48.662	36.65	46.255	56.039	32.675
495.53	35.077	53.501	23.757	59.012	41.728	59.633	33.122	45.47	30.239	60.425	47.891	35.688	19.341	46.866	53.698	51.081	39.945	33.149	45.747	55.438	33.63	68.569	30.456	46.285	29.995	63.768	34.044	65.054	32.106	54.515	28.618	47.236	30.826	39.607	47.064	52.953	59.641	29.205	40.775	47.416	25.266	52.564	31.416	33.444	48.603	36.488	46.241	56.092	32.577
495.96	35.192	53.693	23.864	59.09	41.839	59.701	33.205	45.798	30.346	60.491	47.862	35.749	19.404	46.941	53.799	51.224	40.061	33.175	45.841	55.482	33.725	68.701	30.493	46.39	30.135	63.845	34.094	65.157	32.2	54.542	28.513	47.136	30.789	39.626	47.001	52.789	59.648	29.099	40.717	47.355	25.119	52.451	31.388	33.379	48.55	36.388	46.215	56.119	32.49
496.39	35.312	53.88	23.977	59.243	41.922	59.876	33.269	46.136	30.486	60.678	47.949	35.815	19.464	47.122	53.941	51.503	40.163	33.268	46.025	55.609	33.868	68.856	30.571	46.45	30.259	63.929	34.206	65.276	32.341	54.717	28.355	47.018	30.733	39.677	46.918	52.638	59.654	28.991	40.586	47.239	25.007	52.369	31.35	33.272	48.504	36.297	46.201	56.12	32.379
496.83	35.487	54.075	24.148	59.414	42.032	60.101	33.382	46.547	30.647	60.907	48.137	35.933	19.492	47.33	54.085	51.725	40.337	33.357	46.272	55.813	34.03	69.05	30.682	46.559	30.413	64.129	34.294	65.43	32.423	54.95	28.198	46.945	30.652	39.714	46.864	52.48	59.621	28.894	40.502	47.134	24.874	52.294	31.311	33.187	48.461	36.153	46.119	56.106	32.267
497.26	35.563	54.263	24.272	59.53	42.186	60.266	33.581	46.874	30.789	61.018	48.293	36.049	19.521	47.505	54.255	51.916	40.479	33.386	46.439	55.98	34.095	69.133	30.77	46.647	30.47	64.304	34.364	65.568	32.55	55.064	28.078	46.818	30.552	39.746	46.801	52.306	59.646	28.761	40.427	47.04	24.739	52.201	31.281	33.125	48.434	36.064	46.061	56.112	32.173
497.69	35.687	54.367	24.425	59.695	42.289	60.488	33.624	47.251	30.887	61.225	48.415	36.183	19.555	47.686	54.425	52.156	40.619	33.504	46.577	56.152	34.223	69.358	30.855	46.719	30.57	64.51	34.432	65.681	32.644	55.187	27.968	46.694	30.499	39.747	46.73	52.11	59.578	28.653	40.331	46.876	24.605	52.128	31.21	33.05	48.377	35.948	46.001	56.113	32.025
498.12	35.836	54.51	24.561	59.834	42.416	60.669	33.726	47.624	31.068	61.386	48.555	36.317	19.604	47.881	54.523	52.365	40.714	33.519	46.784	56.318	34.389	69.492	30.97	46.798	30.727	64.59	34.537	65.767	32.776	55.313	27.827	46.626	30.444	39.811	46.681	51.967	59.57	28.523	40.232	46.754	24.466	52.027	31.189	32.972	48.363	35.867	45.933	56.14	31.928
498.56	35.939	54.589	24.679	59.878	42.549	60.862	33.789	47.956	31.142	61.499	48.647	36.431	19.684	47.963	54.598	52.567	40.797	33.558	46.861	56.367	34.482	69.604	31.072	46.768	30.831	64.62	34.664	65.804	32.851	55.33	27.704	46.591	30.351	39.842	46.669	51.835	59.579	28.427	40.151	46.651	24.337	51.935	31.168	32.918	48.311	35.775	45.874	56.168	31.803
498.99	36.031	54.707	24.795	59.94	42.699	61.057	33.896	48.227	31.273	61.607	48.76	36.483	19.741	48.13	54.788	52.774	40.977	33.562	46.94	56.447	34.563	69.657	31.161	46.803	30.952	64.684	34.753	65.862	32.912	55.391	27.579	46.514	30.278	39.859	46.592	51.708	59.522	28.32	40.009	46.572	24.2	51.835	31.104	32.811	48.318	35.674	45.867	56.161	31.699
499.42	36.122	54.863	24.959	60.079	42.854	61.354	33.999	48.639	31.443	61.772	48.903	36.647	19.854	48.345	54.993	53.007	41.108	33.724	47.102	56.639	34.691	69.852	31.236	46.846	31.044	64.85	34.83	66.023	33.01	55.553	27.422	46.402	30.159	39.836	46.528	51.524	59.485	28.209	39.846	46.415	24.024	51.675	31.054	32.728	48.187	35.539	45.805	56.131	31.541
499.86	36.252	54.916	25.082	60.097	42.942	61.47	34.092	48.951	31.593	61.732	48.992	36.67	19.892	48.484	55.118	53.148	41.206	33.768	47.207	56.73	34.747	69.859	31.322	46.886	31.077	64.865	34.921	66.142	33.104	55.656	27.277	46.291	30.081	39.869	46.466	51.396	59.457	28.088	39.77	46.222	23.866	51.569	31.019	32.66	48.142	35.434	45.76	56.142	31.422
500.29	36.358	55.106	25.285	60.265	43.149	61.726	34.211	49.448	31.753	61.904	49.161	36.854	19.988	48.71	55.332	53.332	41.381	33.845	47.394	56.972	34.879	70.028	31.439	46.983	31.2	64.948	35.042	66.313	33.284	55.842	27.184	46.19	30.007	39.893	46.423	51.301	59.477	27.94	39.684	46.107	23.711	51.476	30.972	32.582	48.101	35.346	45.747	56.157	31.271
500.72	36.436	55.208	25.404	60.289	43.258	61.969	34.292	49.81	31.851	61.977	49.247	36.985	20.053	48.828	55.514	53.494	41.5	33.885	47.527	57.072	34.939	70.095	31.501	47.012	31.253	64.937	35.126	66.411	33.374	55.93	27.079	46.099	29.963	39.941	46.374	51.141	59.47	27.879	39.635	46.004	23.602	51.459	30.945	32.511	48.073	35.244	45.697	56.217	31.179
501.15	36.518	55.317	25.571	60.371	43.401	62.125	34.356	50.093	31.932	62.178	49.336	37.042	20.089	49.007	55.738	53.679	41.615	33.981	47.654	57.215	35.043	70.146	31.49	46.961	31.329	65.021	35.149	66.453	33.437	56.027	26.994	45.994	29.852	39.944	46.309	51.013	59.426	27.785	39.504	45.854	23.488	51.327	30.911	32.397	48.03	35.146	45.66	56.255	31.06
501.59	36.621	55.428	25.723	60.524	43.564	62.353	34.475	50.449	32.093	62.281	49.433	37.159	20.197	49.182	55.97	53.887	41.777	34.053	47.862	57.365	35.204	70.334	31.593	47.048	31.473	65.161	35.224	66.614	33.49	56.187	26.796	45.828	29.744	39.925	46.227	50.782	59.347	27.651	39.346	45.64	23.303	51.142	30.836	32.285	47.927	34.957	45.564	56.225	30.865
502.02	36.746	55.543	25.833	60.582	43.721	62.641	34.567	50.78	32.202	62.454	49.462	37.272	20.256	49.298	56.105	54.034	41.896	34.126	47.967	57.556	35.283	70.426	31.675	47.063	31.524	65.277	35.318	66.73	33.51	56.368	26.651	45.721	29.62	39.933	46.139	50.638	59.307	27.559	39.231	45.496	23.151	51.011	30.738	32.197	47.841	34.826	45.438	56.211	30.744
502.45	36.857	55.706	25.922	60.708	43.787	62.829	34.611	51.135	32.323	62.584	49.632	37.44	20.341	49.494	56.217	54.189	42.021	34.178	48.103	57.732	35.396	70.541	31.723	47.168	31.552	65.422	35.444	66.83	33.621	56.54	26.53	45.617	29.578	39.917	46.081	50.468	59.257	27.48	39.169	45.312	23.019	50.908	30.687	32.101	47.783	34.736	45.379	56.199	30.6
502.88	36.935	55.859	26.085	60.864	43.957	63.036	34.742	51.527	32.441	62.716	49.658	37.545	20.424	49.662	56.429	54.389	42.21	34.242	48.253	57.874	35.58	70.672	31.78	47.244	31.601	65.508	35.529	66.911	33.723	56.669	26.457	45.538	29.489	39.918	46.037	50.389	59.233	27.409	39.069	45.202	22.894	50.824	30.659	32.023	47.766	34.638	45.362	56.24	30.497
503.32	37.019	56.036	26.22	60.977	44.06	63.21	34.845	51.879	32.526	62.739	49.736	37.634	20.483	49.821	56.537	54.638	42.33	34.325	48.457	57.998	35.765	70.819	31.904	47.289	31.612	65.661	35.632	67.1	33.853	56.817	26.35	45.441	29.397	39.905	45.99	50.256	59.224	27.34	39.015	45.08	22.778	50.776	30.637	31.975	47.722	34.532	45.35	56.333	30.356
503.75	37.131	56.146	26.332	61.073	44.127	63.417	34.96	52.285	32.621	62.862	49.779	37.667	20.519	49.952	56.634	54.827	42.417	34.415	48.564	58.081	35.83	70.904	31.963	47.301	31.624	65.736	35.681	67.166	33.968	56.905	26.222	45.3	29.288	39.909	45.925	50.114	59.135	27.224	38.893	44.961	22.643	50.648	30.575	31.879	47.678	34.434	45.237	56.293	30.217
504.18	37.256	56.26	26.505	61.293	44.283	63.657	35.064	52.657	32.802	63.02	49.954	37.76	20.623	50.173	56.887	55.045	42.499	34.54	48.755	58.208	35.981	71.018	32.082	47.36	31.674	65.822	35.768	67.263	34.058	57.121	26.055	45.173	29.199	39.934	45.841	49.961	59.113	27.113	38.782	44.752	22.515	50.552	30.541	31.824	47.663	34.309	45.153	56.362	30.118
504.61	37.391	56.399	26.643	61.444	44.42	63.863	35.206	53.032	32.937	63.072	50.124	37.911	20.686	50.371	57.132	55.227	42.692	34.582	48.857	58.339	36.159	71.166	32.182	47.505	31.784	65.937	35.783	67.386	34.113	57.252	25.937	45.059	29.155	39.927	45.783	49.832	59.105	27.03	38.695	44.597	22.397	50.441	30.505	31.773	47.651	34.193	45.135	56.402	30.002
505.04	37.464	56.532	26.77	61.493	44.536	63.938	35.273	53.317	33.026	63.149	50.17	38.018	20.765	50.481	57.268	55.374	42.793	34.57	48.944	58.374	36.244	71.133	32.205	47.539	31.86	65.908	35.816	67.435	34.203	57.305	25.817	44.932	29.093	39.925	45.72	49.662	59.1	26.941	38.596	44.474	22.278	50.374	30.506	31.718	47.646	34.104	45.085	56.46	29.889
505.48	37.628	56.628	26.884	61.633	44.718	64.172	35.368	53.754	33.105	63.297	50.325	38.074	20.826	50.64	57.44	55.584	42.906	34.616	49.098	58.489	36.399	71.268	32.286	47.625	31.954	66.003	35.881	67.574	34.277	57.448	25.674	44.855	29.029	39.953	45.627	49.549	59.041	26.834	38.476	44.362	22.166	50.291	30.453	31.672	47.644	34.03	45.067	56.515	29.759
505.91	37.812	56.821	26.994	61.685	44.894	64.368	35.514	54.109	33.216	63.36	50.459	38.159	20.893	50.806	57.515	55.742	43.082	34.633	49.183	58.564	36.519	71.348	32.338	47.67	32.043	66.018	35.998	67.606	34.363	57.614	25.528	44.737	28.911	39.955	45.567	49.405	59.012	26.714	38.368	44.221	22.028	50.166	30.438	31.561	47.604	33.902	45.013	56.51	29.629
506.34	37.928	56.956	27.146	61.749	45.04	64.598	35.627	54.447	33.311	63.407	50.593	38.299	21.026	51.005	57.723	55.965	43.262	34.725	49.296	58.739	36.658	71.53	32.399	47.764	32.156	66.131	36.055	67.717	34.424	57.818	25.387	44.585	28.817	39.898	45.487	49.233	58.988	26.62	38.248	44.096	21.898	50.066	30.395	31.493	47.552	33.764	44.964	56.558	29.499
506.77	38.087	57.085	27.344	61.843	45.191	64.785	35.726	54.761	33.472	63.571	50.659	38.408	21.101	51.214	57.937	56.213	43.39	34.775	49.45	58.893	36.826	71.642	32.477	47.807	32.277	66.254	36.211	67.776	34.499	58.015	25.241	44.422	28.744	39.889	45.381	49.04	58.901	26.496	38.139	43.934	21.759	49.954	30.335	31.414	47.513	33.654	44.911	56.568	29.37
507.2	38.267	57.239	27.519	62.042	45.259	64.997	35.834	55.136	33.62	63.698	50.751	38.555	21.112	51.399	58.043	56.433	43.413	34.855	49.572	59.028	36.935	71.82	32.575	47.897	32.345	66.322	36.279	67.85	34.638	58.212	25.107	44.266	28.7	39.886	45.311	48.878	58.884	26.405	38.099	43.763	21.644	49.902	30.319	31.363	47.444	33.533	44.844	56.637	29.25
507.64	38.397	57.258	27.651	62.122	45.349	65.08	35.965	55.402	33.678	63.832	50.826	38.572	21.162	51.491	58.128	56.549	43.521	34.867	49.713	59.084	37.112	71.843	32.654	47.895	32.449	66.389	36.336	67.848	34.722	58.289	25.025	44.137	28.635	39.913	45.272	48.744	58.87	26.345	38.067	43.662	21.57	49.829	30.29	31.318	47.514	33.466	44.837	56.744	29.193
508.07	38.553	57.432	27.742	62.288	45.501	65.343	36.059	55.645	33.78	64.029	50.957	38.749	21.235	51.686	58.29	56.786	43.71	34.883	49.87	59.245	37.262	72.03	32.751	47.965	32.518	66.519	36.443	67.892	34.793	58.41	24.897	44.012	28.544	39.925	45.192	48.499	58.803	26.247	37.972	43.523	21.439	49.729	30.209	31.236	47.502	33.35	44.76	56.765	29.067
508.5	38.708	57.426	27.821	62.254	45.531	65.45	36.124	55.791	33.849	64.063	50.962	38.778	21.295	51.77	58.334	56.844	43.792	34.872	49.944	59.307	37.323	72.052	32.766	47.997	32.532	66.549	36.453	67.87	34.803	58.426	24.763	43.9	28.49	39.904	45.119	48.3	58.693	26.167	37.879	43.365	21.342	49.61	30.151	31.143	47.492	33.215	44.716	56.818	28.948
508.93	38.835	57.537	28.029	62.322	45.619	65.522	36.201	56.071	33.955	64.13	51.012	38.868	21.353	51.88	58.469	56.993	43.893	34.883	50.008	59.438	37.469	72.214	32.829	48.078	32.614	66.572	36.55	67.966	34.875	58.553	24.647	43.779	28.389	39.901	45.018	48.146	58.674	26.056	37.755	43.243	21.243	49.441	30.07	31.04	47.473	33.119	44.666	56.791	28.826
509.36	38.983	57.589	28.153	62.45	45.695	65.659	36.351	56.402	34.074	64.232	51.133	38.984	21.429	52.011	58.495	57.2	44.022	34.912	50.179	59.532	37.588	72.276	32.923	48.175	32.694	66.536	36.645	68.006	35.01	58.681	24.516	43.671	28.325	39.918	44.927	47.973	58.637	25.936	37.653	43.108	21.126	49.34	30.052	31.019	47.444	33.015	44.634	56.81	28.713
509.79	39.106	57.653	28.306	62.537	45.709	65.762	36.461	56.691	34.113	64.337	51.235	39.064	21.439	52.143	58.489	57.329	44.086	34.949	50.252	59.589	37.739	72.3	32.933	48.167	32.722	66.592	36.756	67.951	35.053	58.809	24.412	43.585	28.283	39.964	44.838	47.893	58.647	25.829	37.606	43.008	21.04	49.27	30.024	30.972	47.428	32.916	44.641	56.854	28.666
510.23	39.221	57.81	28.464	62.713	45.804	65.871	36.572	57.031	34.242	64.406	51.323	39.184	21.535	52.377	58.628	57.584	44.227	34.983	50.387	59.739	37.939	72.445	33.019	48.261	32.826	66.648	36.812	68.095	35.152	58.897	24.271	43.423	28.235	39.991	44.768	47.685	58.567	25.724	37.524	42.826	20.914	49.154	30.01	30.89	47.404	32.789	44.628	56.858	28.549
510.66	39.347	57.945	28.676	62.775	45.97	66.01	36.706	57.281	34.38	64.483	51.362	39.265	21.619	52.52	58.795	57.797	44.345	35.039	50.535	59.86	38.056	72.584	33.091	48.298	32.945	66.595	36.874	68.148	35.22	58.964	24.141	43.293	28.145	40.02	44.699	47.488	58.487	25.624	37.402	42.672	20.807	49.034	29.955	30.852	47.378	32.667	44.609	56.916	28.455
511.09	39.527	58.05	28.784	62.799	45.998	66.109	36.781	57.56	34.469	64.574	51.437	39.337	21.705	52.711	58.873	57.984	44.415	35.043	50.639	59.985	38.072	72.67	33.143	48.333	33.036	66.606	37.011	68.235	35.298	59.05	24.008	43.163	28.084	40.053	44.598	47.287	58.455	25.532	37.315	42.55	20.656	48.931	29.913	30.766	47.362	32.582	44.555	56.971	28.355
511.52	39.708	58.072	28.905	62.875	46.106	66.241	36.912	57.792	34.599	64.663	51.524	39.473	21.787	52.838	58.966	58.109	44.514	35.064	50.684	60.061	38.218	72.681	33.191	48.41	33.11	66.616	37.082	68.263	35.337	59.146	23.858	43.035	28.012	40.084	44.48	47.09	58.393	25.396	37.182	42.412	20.528	48.775	29.85	30.652	47.248	32.433	44.461	56.931	28.253
511.95	39.879	58.142	29.014	62.99	46.277	66.402	37.026	58.071	34.74	64.814	51.651	39.636	21.922	53.04	59.067	58.236	44.677	35.12	50.796	60.193	38.35	72.801	33.316	48.526	33.234	66.607	37.133	68.319	35.331	59.304	23.711	42.922	27.946	40.124	44.419	46.878	58.37	25.278	37.098	42.28	20.394	48.657	29.842	30.573	47.2	32.321	44.433	56.935	28.148
512.38	40.05	58.266	29.179	63.027	46.388	66.542	37.137	58.284	34.81	64.932	51.724	39.801	21.979	53.203	59.108	58.403	44.836	35.112	50.889	60.312	38.453	72.885	33.405	48.55	33.334	66.761	37.218	68.372	35.407	59.344	23.623	42.828	27.879	40.153	44.369	46.719	58.3	25.167	37.008	42.18	20.304	48.557	29.809	30.479	47.184	32.207	44.452	56.954	28.035
512.82	40.204	58.278	29.328	63.063	46.42	66.685	37.238	58.494	34.855	65.03	51.715	39.903	22.096	53.272	59.091	58.565	44.899	35.127	50.964	60.373	38.516	72.899	33.42	48.53	33.357	66.724	37.274	68.408	35.487	59.435	23.474	42.725	27.756	40.144	44.267	46.529	58.247	25.028	36.915	42.025	20.136	48.405	29.726	30.376	47.088	32.059	44.327	56.914	27.945
513.25	40.454	58.423	29.493	63.237	46.526	66.971	37.401	58.76	35.018	65.174	51.849	40.029	22.266	53.464	59.27	58.8	45.067	35.286	51.13	60.549	38.681	73.119	33.578	48.644	33.437	66.797	37.369	68.612	35.608	59.584	23.352	42.614	27.676	40.147	44.191	46.332	58.156	24.895	36.775	41.848	19.986	48.228	29.614	30.263	46.982	31.973	44.26	56.93	27.814
513.68	40.598	58.465	29.644	63.289	46.6	67.074	37.473	58.906	35.122	65.234	51.88	40.116	22.418	53.569	59.363	58.951	45.18	35.342	51.174	60.633	38.811	73.147	33.663	48.612	33.515	66.806	37.466	68.569	35.696	59.697	23.207	42.425	27.578	40.119	44.105	46.105	58.066	24.797	36.716	41.65	19.831	48.088	29.557	30.152	46.881	31.776	44.161	56.926	27.713
514.11	40.719	58.478	29.747	63.388	46.644	67.179	37.598	59.104	35.242	65.284	51.889	40.236	22.533	53.671	59.414	59.117	45.242	35.408	51.376	60.742	38.898	73.195	33.724	48.696	33.543	66.815	37.525	68.671	35.703	59.724	23.08	42.313	27.529	40.121	44.015	45.955	58	24.676	36.624	41.506	19.687	47.984	29.491	30.086	46.798	31.672	44.101	56.93	27.628
514.54	40.821	58.46	29.861	63.457	46.654	67.154	37.698	59.316	35.311	65.407	51.895	40.285	22.6	53.737	59.382	59.173	45.305	35.399	51.408	60.82	38.967	73.165	33.754	48.703	33.56	66.801	37.572	68.639	35.767	59.747	22.95	42.166	27.425	40.14	43.921	45.739	57.909	24.577	36.502	41.342	19.572	47.84	29.414	29.954	46.749	31.543	44.033	56.885	27.514
514.97	40.93	58.572	29.935	63.558	46.68	67.291	37.836	59.52	35.409	65.527	51.986	40.38	22.719	53.866	59.454	59.301	45.48	35.489	51.522	60.927	39.047	73.19	33.821	48.833	33.561	66.796	37.647	68.763	35.847	59.822	22.825	42.058	27.351	40.144	43.849	45.561	57.846	24.496	36.387	41.142	19.448	47.721	29.356	29.835	46.685	31.402	43.95	56.917	27.403
515.4	41.096	58.559	30.077	63.568	46.811	67.39	38.016	59.767	35.521	65.624	52.093	40.575	22.896	53.938	59.579	59.438	45.706	35.574	51.668	61.044	39.24	73.292	33.924	48.954	33.679	66.852	37.766	68.892	35.895	59.998	22.662	41.952	27.216	40.123	43.744	45.382	57.742	24.362	36.224	40.95	19.281	47.52	29.24	29.729	46.597	31.258	43.857	56.834	27.249
515.83	41.254	58.754	30.259	63.59	46.894	67.634	38.088	59.983	35.655	65.678	52.139	40.802	23.056	54.116	59.73	59.593	45.84	35.614	51.777	61.18	39.337	73.467	33.987	49.098	33.759	66.86	37.827	69.098	35.974	60.132	22.484	41.758	27.124	40.117	43.624	45.145	57.618	24.186	36.041	40.747	19.085	47.329	29.138	29.588	46.44	31.109	43.749	56.724	27.036
516.26	41.312	58.846	30.48	63.629	46.991	67.74	38.286	60.336	35.787	65.78	52.188	40.909	23.192	54.188	59.871	59.83	45.905	35.682	51.838	61.196	39.489	73.523	34.024	49.147	33.881	66.946	37.83	69.198	36.061	60.233	22.321	41.626	27.045	40.115	43.55	44.965	57.574	24.079	35.919	40.617	18.949	47.216	29.114	29.457	46.345	30.947	43.701	56.729	26.878
516.7	41.384	58.913	30.594	63.664	46.984	67.8	38.385	60.554	35.835	65.875	52.211	41.006	23.236	54.231	59.935	59.996	45.96	35.687	51.872	61.226	39.614	73.545	34.037	49.159	33.975	66.923	37.856	69.24	36.064	60.297	22.158	41.451	26.91	40.087	43.452	44.75	57.491	23.95	35.781	40.392	18.779	47.003	29.03	29.332	46.24	30.779	43.566	56.676	26.707
517.13	41.571	58.933	30.602	63.724	47.029	67.937	38.523	60.677	35.853	65.948	52.355	41.059	23.355	54.36	59.938	60.042	46.054	35.788	51.959	61.268	39.709	73.458	34.127	49.172	34.062	66.959	37.875	69.195	36.044	60.289	22.003	41.301	26.832	40.064	43.371	44.574	57.352	23.8	35.661	40.226	18.603	46.819	28.963	29.24	46.151	30.594	43.497	56.672	26.536
517.56	41.734	58.985	30.697	63.748	47.1	68.119	38.643	60.845	35.921	65.982	52.374	41.183	23.458	54.487	60.101	60.217	46.128	35.803	52.005	61.352	39.9	73.56	34.219	49.205	34.155	67.106	37.897	69.31	36.069	60.358	21.819	41.107	26.724	40.046	43.308	44.342	57.289	23.68	35.554	40.078	18.414	46.666	28.881	29.127	46.055	30.439	43.41	56.643	26.372
517.99	41.855	59.085	30.759	63.772	47.198	68.199	38.746	60.945	36.012	66.102	52.455	41.268	23.537	54.58	60.269	60.352	46.195	35.796	52.135	61.448	40.035	73.629	34.335	49.245	34.174	67.096	37.892	69.382	36.163	60.383	21.68	40.965	26.613	40.061	43.201	44.066	57.2	23.545	35.445	39.921	18.265	46.509	28.781	29.043	46.021	30.307	43.296	56.6	26.189
518.42	41.974	59.069	30.854	63.747	47.303	68.291	38.869	61.067	36.082	66.151	52.543	41.316	23.589	54.568	60.28	60.444	46.253	35.804	52.199	61.382	40.081	73.6	34.369	49.259	34.284	67.078	37.898	69.307	36.191	60.492	21.531	40.864	26.476	40.022	43.102	43.854	57.085	23.41	35.321	39.765	18.115	46.329	28.696	28.947	45.954	30.156	43.175	56.57	26.037
518.85	42.096	59.06	30.942	63.846	47.349	68.39	38.989	61.282	36.129	66.203	52.636	41.409	23.659	54.605	60.277	60.583	46.366	35.818	52.245	61.415	40.196	73.654	34.403	49.307	34.299	67.156	37.871	69.352	36.186	60.547	21.361	40.687	26.343	40.006	42.966	43.632	56.998	23.236	35.179	39.588	17.936	46.179	28.561	28.803	45.839	29.97	43.012	56.536	25.834
519.28	42.248	59.139	31.058	63.869	47.478	68.602	39.135	61.429	36.243	66.245	52.758	41.509	23.786	54.66	60.404	60.719	46.47	35.817	52.273	61.417	40.333	73.739	34.472	49.336	34.376	67.237	37.894	69.344	36.255	60.607	21.198	40.514	26.242	39.985	42.854	43.443	56.906	23.098	35.085	39.414	17.827	45.973	28.473	28.694	45.755	29.794	42.938	56.495	25.63
519.71	42.349	59.197	31.188	63.848	47.575	68.717	39.252	61.602	36.279	66.356	52.816	41.609	23.814	54.777	60.513	60.824	46.589	35.856	52.371	61.543	40.371	73.799	34.47	49.398	34.53	67.288	37.979	69.403	36.305	60.62	21.035	40.361	26.107	39.915	42.792	43.188	56.811	22.957	34.947	39.175	17.645	45.758	28.375	28.572	45.707	29.662	42.818	56.452	25.468
520.14	42.462	59.243	31.401	63.826	47.614	68.832	39.371	61.75	36.306	66.388	52.876	41.692	23.857	54.815	60.6	61.01	46.718	35.843	52.417	61.6	40.478	73.808	34.468	49.459	34.62	67.356	38.037	69.42	36.356	60.655	20.911	40.186	26.036	39.853	42.665	43.007	56.737	22.842	34.785	39.006	17.488	45.635	28.255	28.433	45.625	29.509	42.725	56.424	25.321
520.57	42.617	59.288	31.476	63.882	47.697	68.956	39.576	61.952	36.339	66.426	52.982	41.738	23.896	54.942	60.688	61.19	46.814	35.888	52.533	61.719	40.581	73.886	34.476	49.586	34.686	67.31	38.131	69.487	36.423	60.796	20.764	40.009	25.939	39.801	42.592	42.823	56.686	22.723	34.675	38.837	17.35	45.491	28.167	28.338	45.547	29.368	42.596	56.395	25.153
521	42.783	59.263	31.578	63.884	47.806	68.985	39.76	62.158	36.43	66.413	53.132	41.808	23.975	54.977	60.751	61.293	46.864	35.926	52.614	61.767	40.656	73.909	34.561	49.626	34.776	67.361	38.187	69.432	36.442	60.835	20.642	39.859	25.836	39.774	42.528	42.605	56.617	22.622	34.542	38.696	17.242	45.388	28.114	28.241	45.529	29.258	42.547	56.417	24.998
521.43	42.845	59.29	31.659	63.823	47.843	68.968	39.868	62.341	36.405	66.336	53.186	41.902	24.041	55.063	60.775	61.413	46.933	35.908	52.664	61.797	40.745	73.921	34.547	49.583	34.781	67.387	38.22	69.391	36.438	60.89	20.503	39.744	25.744	39.814	42.437	42.502	56.616	22.543	34.481	38.557	17.148	45.285	28.049	28.18	45.518	29.11	42.524	56.433	24.895
521.86	43.028	59.444	31.892	63.909	47.885	69.1	40.042	62.568	36.518	66.427	53.289	42.078	24.204	55.186	60.847	61.554	47.017	36.01	52.843	61.948	40.878	74.032	34.599	49.733	34.883	67.471	38.313	69.521	36.489	60.958	20.417	39.665	25.672	39.836	42.363	42.351	56.592	22.453	34.378	38.435	17.088	45.16	27.991	28.103	45.482	29.045	42.495	56.49	24.788
522.29	43.069	59.498	32.026	63.919	47.951	69.185	40.148	62.683	36.535	66.546	53.33	42.141	24.286	55.313	60.974	61.668	47.085	36.01	52.871	62.038	41.005	74.08	34.677	49.749	35.018	67.542	38.408	69.591	36.599	61.029	20.282	39.527	25.578	39.815	42.273	42.179	56.601	22.346	34.265	38.284	16.985	45.037	27.933	28.022	45.479	28.946	42.47	56.521	24.664
522.72	43.208	59.613	32.138	64.005	48.084	69.362	40.293	62.824	36.586	66.568	53.424	42.254	24.316	55.345	61.107	61.837	47.229	36.064	52.979	62.085	41.102	74.114	34.728	49.816	35.076	67.688	38.464	69.674	36.657	61.138	20.164	39.44	25.509	39.832	42.205	42.03	56.59	22.254	34.181	38.134	16.861	44.944	27.891	27.949	45.443	28.846	42.442	56.571	24.577
523.15	43.337	59.625	32.264	64.042	48.154	69.454	40.402	63.067	36.657	66.593	53.577	42.392	24.378	55.46	61.226	61.983	47.288	36.048	53.123	62.068	41.2	74.215	34.782	49.877	35.147	67.703	38.511	69.712	36.742	61.245	20.051	39.311	25.412	39.856	42.114	41.89	56.551	22.152	34.082	38.066	16.754	44.866	27.867	27.903	45.417	28.735	42.435	56.599	24.518
523.58	43.395	59.645	32.309	64.047	48.164	69.488	40.447	63.115	36.68	66.549	53.643	42.373	24.444	55.471	61.243	62.021	47.27	36.011	53.128	61.995	41.192	74.198	34.757	49.826	35.13	67.667	38.506	69.695	36.743	61.201	19.985	39.172	25.332	39.881	42.05	41.73	56.564	22.079	34.033	37.984	16.696	44.818	27.841	27.837	45.466	28.693	42.43	56.7	24.465
524.01	43.507	59.581	32.363	64.101	48.225	69.473	40.576	63.252	36.701	66.579	53.787	42.393	24.524	55.51	61.309	62.161	47.314	35.982	53.178	62.024	41.274	74.227	34.848	49.845	35.161	67.728	38.537	69.675	36.808	61.278	19.891	39.106	25.271	39.903	41.986	41.569	56.549	22.023	33.986	37.865	16.622	44.759	27.801	27.777	45.481	28.591	42.381	56.793	24.423
524.44	43.714	59.592	32.407	64.128	48.3	69.493	40.657	63.295	36.723	66.529	53.825	42.429	24.567	55.56	61.326	62.127	47.342	35.984	53.258	62.085	41.361	74.329	34.869	49.919	35.242	67.688	38.593	69.7	36.837	61.268	19.827	38.986	25.209	39.936	41.907	41.461	56.518	21.906	33.906	37.748	16.555	44.69	27.745	27.733	45.495	28.498	42.364	56.817	24.38
524.87	43.864	59.694	32.511	64.204	48.456	69.65	40.817	63.505	36.893	66.592	54.006	42.543	24.69	55.698	61.468	62.283	47.48	36.06	53.326	62.196	41.427	74.432	35.005	49.971	35.341	67.824	38.665	69.81	36.946	61.336	19.729	38.902	25.132	39.926	41.828	41.32	56.483	21.813	33.816	37.668	16.465	44.667	27.726	27.682	45.438	28.442	42.362	56.832	24.363
525.3	43.951	59.779	32.615	64.274	48.585	69.761	40.958	63.691	37.027	66.656	54.084	42.634	24.762	55.772	61.601	62.42	47.607	36.027	53.426	62.215	41.53	74.576	35.067	50.022	35.449	67.892	38.697	69.909	37.065	61.43	19.636	38.817	25.055	39.995	41.762	41.164	56.455	21.735	33.764	37.518	16.399	44.627	27.688	27.62	45.382	28.373	42.32	56.845	24.33
525.73	44.047	59.85	32.716	64.281	48.676	69.832	41.049	63.824	37.082	66.745	54.136	42.721	24.817	55.831	61.619	62.44	47.631	36.045	53.509	62.287	41.537	74.602	35.127	50.077	35.466	67.883	38.746	69.891	37.13	61.511	19.592	38.737	24.986	39.996	41.709	41.08	56.392	21.648	33.666	37.392	16.345	44.567	27.652	27.549	45.392	28.258	42.293	56.882	24.267
526.16	44.171	59.882	32.839	64.312	48.819	69.987	41.193	63.976	37.214	66.781	54.223	42.807	24.916	55.914	61.619	62.549	47.773	36.04	53.529	62.269	41.591	74.623	35.123	50.123	35.614	67.931	38.877	69.931	37.215	61.52	19.491	38.596	24.907	39.97	41.652	40.978	56.312	21.576	33.532	37.244	16.255	44.472	27.615	27.459	45.34	28.166	42.273	56.912	24.181
526.59	44.317	59.97	32.971	64.404	48.879	70.129	41.29	64.115	37.282	66.83	54.342	42.915	25.056	56.102	61.781	62.671	47.867	36.133	53.633	62.428	41.731	74.775	35.186	50.167	35.73	68.094	38.996	70.046	37.301	61.59	19.407	38.488	24.858	40.004	41.605	40.884	56.355	21.468	33.452	37.16	16.157	44.4	27.553	27.375	45.29	28.079	42.264	56.979	24.113
527.02	44.461	60.084	33.087	64.454	48.95	70.249	41.457	64.252	37.401	66.929	54.435	43.051	25.177	56.29	61.922	62.811	47.97	36.175	53.742	62.496	41.867	74.828	35.329	50.245	35.884	68.168	39.085	70.155	37.411	61.683	19.33	38.395	24.833	40.008	41.554	40.788	56.383	21.391	33.39	37.081	16.072	44.347	27.532	27.34	45.314	28.005	42.243	56.994	24.086
527.45	44.539	60.01	33.213	64.479	48.964	70.204	41.606	64.32	37.491	66.902	54.456	43.119	25.266	56.338	61.872	62.86	48.043	36.201	53.835	62.515	41.936	74.791	35.355	50.252	35.91	68.119	39.092	70.187	37.431	61.622	19.252	38.315	24.802	40.014	41.54	40.672	56.379	21.305	33.311	36.972	16.003	44.331	27.5	27.309	45.274	27.933	42.264	57.043	24.07
527.88	44.673	60.044	33.314	64.598	49.045	70.274	41.735	64.496	37.601	66.938	54.561	43.185	25.386	56.419	61.896	63.013	48.103	36.212	53.981	62.529	42.064	74.871	35.461	50.284	35.969	68.152	39.169	70.205	37.54	61.75	19.178	38.183	24.766	40.039	41.456	40.551	56.32	21.217	33.239	36.878	15.944	44.287	27.463	27.23	45.222	27.825	42.264	57.09	23.995
528.31	44.849	60.158	33.444	64.693	49.179	70.42	41.924	64.723	37.721	67.092	54.7	43.326	25.562	56.55	61.998	63.16	48.203	36.265	54.099	62.686	42.241	75.017	35.584	50.367	36.096	68.321	39.294	70.321	37.699	61.865	19.066	38.126	24.674	40.088	41.403	40.407	56.282	21.109	33.187	36.751	15.898	44.162	27.415	27.167	45.201	27.736	42.255	57.157	23.934
528.74	44.915	60.129	33.559	64.605	49.153	70.417	41.984	64.81	37.824	67.067	54.752	43.411	25.74	56.565	62.029	63.213	48.214	36.188	54.066	62.609	42.311	74.985	35.646	50.279	36.184	68.341	39.264	70.305	37.676	61.843	18.984	38.027	24.593	40.103	41.313	40.238	56.229	21.014	33.09	36.633	15.785	44.052	27.341	27.078	45.201	27.653	42.239	57.168	23.849
529.17	45.065	60.277	33.641	64.737	49.258	70.595	42.037	64.955	37.916	67.161	54.822	43.506	25.859	56.727	62.183	63.371	48.32	36.202	54.247	62.739	42.496	75.177	35.765	50.367	36.333	68.447	39.342	70.497	37.749	61.908	18.9	37.953	24.541	40.128	41.234	40.103	56.196	20.913	33.032	36.467	15.675	43.961	27.292	27.025	45.157	27.535	42.193	57.167	23.796
529.6	45.217	60.363	33.732	64.831	49.369	70.786	42.2	65.067	38.108	67.285	54.86	43.571	25.928	56.701	62.193	63.473	48.399	36.25	54.3	62.758	42.607	75.242	35.84	50.443	36.487	68.505	39.395	70.531	37.845	61.974	18.805	37.754	24.432	40.067	41.153	39.877	56.045	20.794	32.864	36.321	15.529	43.789	27.191	26.882	45.059	27.386	42.066	57.108	23.688
530.03	45.293	60.356	33.684	64.794	49.381	70.783	42.312	65.104	38.153	67.242	54.847	43.579	25.938	56.676	62.259	63.619	48.398	36.206	54.218	62.753	42.628	75.202	35.848	50.471	36.547	68.458	39.329	70.456	37.84	61.937	18.658	37.566	24.325	40.087	41.074	39.695	56.005	20.656	32.761	36.168	15.396	43.678	27.147	26.801	44.995	27.244	41.996	57.045	23.622
530.46	45.507	60.426	33.788	64.838	49.494	70.877	42.514	65.294	38.29	67.264	54.964	43.683	26.056	56.694	62.313	63.753	48.497	36.253	54.334	62.741	42.696	75.259	35.879	50.606	36.523	68.48	39.329	70.49	37.858	62.002	18.54	37.395	24.198	40.091	40.916	39.432	55.765	20.509	32.631	35.969	15.258	43.457	27.037	26.674	44.843	27.045	41.812	56.92	23.488
530.89	45.651	60.376	33.834	64.797	49.548	70.851	42.602	65.374	38.349	67.241	54.974	43.713	26.228	56.743	62.305	63.796	48.474	36.235	54.453	62.748	42.706	75.246	35.951	50.6	36.603	68.358	39.342	70.475	37.865	61.91	18.433	37.239	24.138	40.064	40.852	39.239	55.661	20.399	32.515	35.865	15.18	43.35	26.931	26.581	44.793	26.907	41.729	56.882	23.372
531.32	45.746	60.422	33.942	64.797	49.602	70.967	42.804	65.413	38.356	67.229	54.993	43.717	26.32	56.799	62.31	63.865	48.488	36.245	54.4	62.843	42.831	75.235	36.024	50.646	36.703	68.306	39.278	70.458	37.908	61.884	18.303	37.074	24.046	40.007	40.727	39.039	55.549	20.282	32.366	35.661	15.056	43.175	26.787	26.428	44.677	26.753	41.596	56.719	23.217
531.75	45.89	60.51	34.121	64.852	49.677	71.015	42.948	65.537	38.404	67.293	55.02	43.814	26.435	56.862	62.306	63.955	48.565	36.293	54.529	62.954	43.006	75.209	36.126	50.684	36.8	68.352	39.389	70.44	38.032	61.891	18.168	36.909	23.975	39.992	40.601	38.83	55.411	20.137	32.187	35.476	14.874	42.957	26.675	26.29	44.529	26.523	41.485	56.6	23.082
532.18	46.062	60.692	34.271	64.951	49.78	71.189	43.143	65.679	38.566	67.369	55.16	43.91	26.522	56.943	62.373	64.092	48.78	36.387	54.635	63.043	43.103	75.289	36.164	50.794	36.936	68.373	39.533	70.46	38.091	61.952	18.066	36.774	23.897	39.944	40.496	38.678	55.319	20.003	32.008	35.338	14.759	42.763	26.562	26.202	44.411	26.372	41.383	56.541	22.954
532.61	46.197	60.842	34.388	64.956	49.807	71.357	43.343	65.87	38.69	67.519	55.256	44.075	26.66	57.056	62.484	64.261	48.978	36.404	54.818	63.129	43.204	75.328	36.247	50.827	37.015	68.528	39.599	70.418	38.171	62.12	17.984	36.661	23.84	39.941	40.437	38.508	55.321	19.94	31.911	35.216	14.646	42.648	26.504	26.144	44.335	26.282	41.332	56.522	22.839
533.04	46.394	60.962	34.545	65.039	49.86	71.4	43.537	65.904	38.704	67.524	55.288	44.169	26.756	57.096	62.616	64.401	49.04	36.404	54.936	63.157	43.308	75.405	36.289	50.851	37.125	68.517	39.684	70.373	38.185	62.155	17.906	36.495	23.761	39.948	40.369	38.318	55.249	19.831	31.768	35.041	14.523	42.494	26.366	26.026	44.28	26.145	41.247	56.486	22.696
533.47	46.504	60.919	34.635	65.011	49.806	71.403	43.64	65.963	38.737	67.526	55.123	44.236	26.851	57.085	62.548	64.46	49.054	36.36	54.896	63.246	43.311	75.37	36.236	50.808	37.079	68.425	39.667	70.296	38.221	62.137	17.774	36.33	23.671	39.911	40.258	38.155	55.151	19.687	31.586	34.902	14.402	42.27	26.24	25.892	44.16	26.005	41.166	56.431	22.518
533.9	46.576	61.019	34.723	65.031	49.907	71.431	43.761	66.054	38.842	67.517	55.189	44.338	26.968	57.142	62.551	64.555	49.086	36.324	54.974	63.223	43.383	75.386	36.306	50.889	37.256	68.433	39.716	70.366	38.216	62.114	17.619	36.212	23.584	39.895	40.174	37.948	55.072	19.577	31.484	34.744	14.315	42.11	26.112	25.769	44.009	25.918	41.015	56.364	22.406
534.33	46.689	61.057	34.825	64.998	49.916	71.471	43.887	66.105	38.785	67.494	55.206	44.457	27.089	57.183	62.5	64.571	49.071	36.336	55.004	63.205	43.431	75.459	36.415	50.951	37.306	68.402	39.713	70.377	38.226	62.172	17.509	36.1	23.48	39.879	40.098	37.758	55.004	19.432	31.382	34.618	14.21	41.998	26.004	25.609	43.906	25.758	40.863	56.273	22.304
534.75	46.781	61.067	34.922	64.98	49.975	71.458	44.08	66.213	38.799	67.591	55.161	44.591	27.188	57.059	62.482	64.625	49.152	36.257	54.965	63.146	43.462	75.378	36.453	50.942	37.332	68.235	39.778	70.304	38.298	62.135	17.374	35.905	23.348	39.793	39.975	37.504	54.818	19.326	31.183	34.442	14.069	41.791	25.865	25.447	43.795	25.582	40.721	56.039	22.14
535.18	46.935	61.034	34.975	64.983	50.074	71.574	44.217	66.262	38.825	67.647	55.263	44.677	27.281	56.989	62.52	64.704	49.231	36.273	55.07	63.243	43.491	75.35	36.448	51.025	37.341	68.232	39.807	70.265	38.351	62.135	17.245	35.745	23.19	39.732	39.853	37.271	54.611	19.204	31.051	34.216	13.942	41.508	25.769	25.25	43.564	25.438	40.572	55.897	21.95
535.61	47.039	61.125	35.022	64.866	50.166	71.658	44.365	66.363	38.84	67.697	55.31	44.721	27.373	57.011	62.596	64.789	49.251	36.282	55.097	63.284	43.656	75.383	36.508	51.064	37.375	68.174	39.867	70.177	38.42	62.263	17.101	35.568	23.033	39.674	39.644	37.037	54.445	19.08	30.871	34.013	13.812	41.289	25.653	25.071	43.397	25.295	40.408	55.712	21.815
536.04	47.298	61.164	35.146	64.866	50.293	71.8	44.569	66.436	38.878	67.805	55.345	44.829	27.549	57.145	62.634	64.834	49.375	36.311	55.05	63.433	43.772	75.476	36.557	51.145	37.449	68.218	39.866	70.264	38.457	62.281	16.991	35.439	22.961	39.662	39.534	36.868	54.335	18.997	30.784	33.883	13.712	41.158	25.593	24.994	43.376	25.183	40.296	55.635	21.722
536.47	47.394	61.145	35.128	64.773	50.346	71.822	44.675	66.434	38.856	67.709	55.276	44.88	27.613	57.158	62.646	64.904	49.426	36.272	55.065	63.407	43.794	75.503	36.519	51.162	37.427	68.158	39.821	70.287	38.497	62.207	16.921	35.339	22.888	39.624	39.472	36.775	54.271	18.933	30.696	33.785	13.616	41.139	25.551	24.945	43.355	25.098	40.284	55.632	21.618
536.9	47.56	61.222	35.16	64.844	50.528	71.938	44.852	66.589	38.901	67.903	55.402	45.012	27.703	57.279	62.785	65.044	49.562	36.329	55.165	63.573	43.899	75.556	36.537	51.322	37.5	68.207	39.917	70.462	38.675	62.326	16.835	35.256	22.838	39.663	39.412	36.683	54.337	18.893	30.675	33.706	13.568	41.13	25.56	24.925	43.334	25.046	40.322	55.775	21.6
537.33	47.635	61.294	35.271	64.832	50.498	71.859	45.039	66.686	38.966	67.956	55.396	45.143	27.827	57.242	62.782	65.148	49.645	36.338	55.173	63.583	43.993	75.573	36.531	51.411	37.503	68.274	39.932	70.386	38.796	62.271	16.751	35.149	22.769	39.707	39.381	36.583	54.343	18.836	30.613	33.672	13.548	41.106	25.583	24.902	43.369	25.024	40.344	55.916	21.571
537.76	47.739	61.252	35.364	64.783	50.556	71.873	45.168	66.739	38.997	67.981	55.439	45.226	27.976	57.358	62.83	65.255	49.665	36.379	55.176	63.607	44.071	75.631	36.596	51.477	37.548	68.284	40.002	70.371	38.803	62.322	16.701	35.142	22.747	39.747	39.387	36.556	54.425	18.785	30.633	33.627	13.528	41.179	25.6	24.921	43.482	25.03	40.425	56.09	21.571
538.19	47.835	61.282	35.499	64.809	50.626	71.984	45.316	66.837	39.077	68.022	55.521	45.31	28.073	57.442	62.828	65.337	49.804	36.352	55.223	63.588	44.104	75.674	36.68	51.446	37.617	68.294	40.083	70.439	38.831	62.386	16.656	35.131	22.755	39.796	39.387	36.515	54.406	18.76	30.606	33.587	13.504	41.166	25.592	24.906	43.534	25	40.411	56.199	21.511
538.61	47.927	61.177	35.552	64.812	50.607	71.881	45.431	66.802	39.1	67.942	55.535	45.348	28.136	57.456	62.864	65.351	49.813	36.332	55.12	63.54	44.159	75.604	36.722	51.382	37.728	68.265	40.092	70.39	38.909	62.417	16.619	35.078	22.736	39.828	39.413	36.482	54.48	18.762	30.568	33.572	13.479	41.203	25.587	24.89	43.613	24.987	40.485	56.326	21.522
539.04	48.052	61.33	35.72	64.909	50.728	72.055	45.626	66.9	39.202	68.182	55.652	45.497	28.261	57.637	63.038	65.499	49.879	36.405	55.189	63.637	44.326	75.82	36.808	51.529	37.846	68.385	40.196	70.587	39.056	62.64	16.558	35.009	22.672	39.884	39.36	36.433	54.475	18.708	30.518	33.491	13.418	41.106	25.592	24.839	43.576	24.945	40.479	56.323	21.462
539.47	48.15	61.369	35.76	64.946	50.84	72.029	45.732	66.928	39.276	68.19	55.684	45.601	28.406	57.568	63.043	65.549	49.951	36.403	55.261	63.704	44.371	75.885	36.844	51.532	37.937	68.512	40.246	70.616	39.114	62.761	16.529	34.966	22.653	39.923	39.372	36.383	54.512	18.662	30.524	33.477	13.382	41.056	25.6	24.821	43.599	24.906	40.512	56.425	21.425
539.9	48.282	61.42	35.77	64.936	50.867	72.126	45.847	67.004	39.311	68.231	55.76	45.635	28.5	57.591	63.2	65.651	50.058	36.341	55.305	63.726	44.403	76.027	36.911	51.599	38.002	68.488	40.28	70.675	39.147	62.806	16.481	34.934	22.586	39.923	39.36	36.311	54.484	18.641	30.5	33.409	13.376	41.03	25.589	24.811	43.553	24.892	40.501	56.445	21.393
540.33	48.344	61.377	35.731	64.922	50.852	72.059	45.921	67.023	39.256	68.204	55.709	45.685	28.581	57.577	63.199	65.634	49.982	36.253	55.283	63.685	44.43	75.981	36.928	51.548	38.016	68.434	40.251	70.684	39.13	62.813	16.44	34.843	22.54	39.932	39.34	36.224	54.465	18.605	30.469	33.333	13.319	40.999	25.589	24.775	43.537	24.859	40.511	56.461	21.334
540.76	48.385	61.393	35.758	64.945	50.917	72.067	46.005	66.997	39.278	68.156	55.743	45.674	28.697	57.531	63.179	65.668	49.96	36.3	55.208	63.69	44.457	75.982	36.948	51.561	38.02	68.353	40.311	70.728	39.191	62.785	16.354	34.792	22.461	39.875	39.297	36.118	54.38	18.537	30.364	33.218	13.235	40.851	25.541	24.679	43.48	24.769	40.43	56.437	21.293
541.19	48.452	61.355	35.805	64.864	50.925	72.131	46.075	67.05	39.303	68.082	55.757	45.729	28.831	57.565	63.12	65.74	49.995	36.275	55.19	63.675	44.545	75.961	36.95	51.584	38.078	68.296	40.299	70.747	39.256	62.849	16.298	34.739	22.42	39.871	39.226	36.043	54.353	18.494	30.311	33.147	13.187	40.773	25.555	24.678	43.469	24.702	40.37	56.428	21.242
541.61	48.619	61.438	35.878	64.883	51.012	72.168	46.224	67.105	39.4	68.119	55.958	45.809	28.987	57.638	63.188	65.853	50.048	36.335	55.257	63.657	44.674	76.008	37.027	51.7	38.195	68.351	40.387	70.804	39.327	62.905	16.244	34.654	22.376	39.859	39.192	35.96	54.386	18.444	30.294	33.075	13.137	40.789	25.559	24.661	43.488	24.653	40.337	56.464	21.223
542.04	48.759	61.435	35.977	64.93	51.026	72.208	46.389	67.207	39.496	68.167	55.985	45.894	29.125	57.666	63.254	65.953	50.171	36.383	55.25	63.765	44.738	76.107	37.058	51.693	38.272	68.367	40.482	70.838	39.347	62.98	16.214	34.565	22.347	39.848	39.145	35.88	54.351	18.402	30.266	33.006	13.077	40.75	25.574	24.611	43.495	24.58	40.31	56.448	21.211
542.47	48.868	61.486	36.04	64.935	51.078	72.213	46.535	67.308	39.548	68.222	56.023	45.891	29.25	57.658	63.371	66.082	50.309	36.411	55.277	63.842	44.788	76.085	37.078	51.719	38.361	68.366	40.492	70.842	39.374	63.045	16.167	34.472	22.311	39.803	39.125	35.791	54.318	18.403	30.233	32.937	13.033	40.702	25.571	24.617	43.471	24.566	40.336	56.476	21.163
542.9	49.003	61.479	36.085	64.902	51.091	72.302	46.675	67.293	39.659	68.246	56.047	45.916	29.372	57.758	63.447	66.165	50.328	36.382	55.319	63.895	44.798	76.182	37.114	51.738	38.409	68.419	40.453	70.966	39.464	63.043	16.142	34.44	22.286	39.82	39.12	35.754	54.291	18.384	30.255	32.831	13.027	40.717	25.609	24.609	43.483	24.541	40.358	56.626	21.163
543.33	49.14	61.544	36.213	64.95	51.195	72.327	46.839	67.444	39.725	68.235	56.069	45.968	29.563	57.862	63.509	66.253	50.383	36.44	55.344	63.91	44.884	76.289	37.198	51.727	38.522	68.464	40.568	70.998	39.584	63.107	16.104	34.431	22.315	39.904	39.156	35.751	54.364	18.376	30.255	32.846	13.017	40.759	25.647	24.67	43.597	24.534	40.461	56.799	21.182
543.75	49.325	61.594	36.384	65.057	51.251	72.486	47.015	67.479	39.78	68.249	56.161	46.116	29.666	57.966	63.6	66.393	50.5	36.515	55.425	63.985	44.883	76.345	37.279	51.814	38.735	68.568	40.636	71.113	39.674	63.211	16.069	34.38	22.291	39.993	39.217	35.675	54.4	18.332	30.25	32.801	12.975	40.787	25.663	24.677	43.682	24.501	40.472	56.94	21.151
544.18	49.338	61.613	36.41	65.085	51.175	72.526	47.058	67.494	39.849	68.191	56.205	46.18	29.813	57.933	63.677	66.457	50.515	36.476	55.44	63.916	44.878	76.353	37.338	51.782	38.834	68.441	40.632	71.063	39.705	63.278	16.045	34.323	22.249	40.079	39.231	35.656	54.472	18.306	30.227	32.781	12.938	40.75	25.689	24.671	43.676	24.511	40.517	57.052	21.136
544.61	49.469	61.666	36.491	65.294	51.225	72.498	47.201	67.52	39.978	68.25	56.322	46.28	29.989	57.949	63.708	66.539	50.576	36.519	55.495	63.893	44.957	76.322	37.438	51.793	38.97	68.331	40.687	71.08	39.769	63.31	16.001	34.246	22.261	40.151	39.212	35.575	54.463	18.281	30.168	32.695	12.92	40.659	25.691	24.687	43.678	24.459	40.478	57.084	21.156
545.04	49.564	61.641	36.572	65.366	51.218	72.513	47.342	67.518	40.025	68.153	56.326	46.263	30.122	57.863	63.647	66.549	50.55	36.595	55.535	63.903	45.067	76.375	37.544	51.752	39.059	68.32	40.678	70.985	39.725	63.239	15.951	34.149	22.17	40.159	39.156	35.433	54.313	18.177	30.056	32.552	12.84	40.479	25.633	24.601	43.589	24.351	40.373	56.948	21.044
545.47	49.57	61.694	36.674	65.317	51.384	72.683	47.56	67.576	40.076	68.193	56.446	46.372	30.249	57.999	63.721	66.534	50.547	36.587	55.584	63.898	45.009	76.361	37.652	51.718	39.2	68.297	40.729	71.004	39.762	63.318	15.889	34.023	22.095	40.122	39.121	35.291	54.199	18.086	29.94	32.38	12.714	40.286	25.533	24.499	43.477	24.219	40.249	56.774	20.913
545.89	49.772	61.7	36.831	65.359	51.48	72.704	47.702	67.653	40.125	68.264	56.546	46.471	30.412	58.076	63.802	66.584	50.641	36.56	55.666	63.996	45.067	76.366	37.691	51.814	39.327	68.268	40.707	71.106	39.886	63.314	15.816	33.879	22.031	40.073	39.022	35.106	54.059	17.986	29.796	32.214	12.647	40.068	25.467	24.39	43.266	24.06	40.091	56.576	20.766
546.32	49.866	61.73	36.883	65.407	51.601	72.782	47.822	67.664	40.14	68.27	56.606	46.591	30.548	58.069	63.885	66.634	50.611	36.557	55.721	64.067	45.205	76.454	37.745	51.921	39.438	68.238	40.787	71.101	40.044	63.407	15.767	33.761	21.931	39.999	38.94	34.966	53.994	17.912	29.699	32.094	12.56	39.944	25.405	24.305	43.107	23.955	40.019	56.47	20.69
546.75	49.944	61.824	36.974	65.432	51.702	72.979	47.963	67.94	40.223	68.324	56.715	46.639	30.745	58.122	63.881	66.785	50.664	36.513	55.827	64.115	45.284	76.522	37.801	51.991	39.513	68.254	40.796	71.16	40.076	63.443	15.679	33.665	21.849	39.975	38.855	34.838	53.891	17.794	29.616	31.968	12.488	39.794	25.328	24.231	42.956	23.871	39.938	56.378	20.546
547.18	49.992	61.824	37	65.415	51.704	73.021	48.049	67.977	40.289	68.214	56.828	46.646	30.859	58.042	63.827	66.83	50.717	36.453	55.826	64.113	45.314	76.397	37.799	51.915	39.587	68.157	40.853	71.021	40.068	63.371	15.606	33.587	21.81	39.967	38.817	34.711	53.816	17.758	29.56	31.857	12.419	39.744	25.265	24.208	42.877	23.779	39.868	56.325	20.51
547.61	50.126	61.846	37.131	65.443	51.728	73.081	48.222	68.079	40.333	68.253	56.828	46.735	31.021	58.176	63.884	66.876	50.809	36.484	55.91	64.135	45.391	76.432	37.859	51.962	39.688	68.169	40.845	71.044	40.124	63.264	15.555	33.512	21.779	40.006	38.773	34.638	53.739	17.709	29.5	31.747	12.369	39.668	25.222	24.184	42.801	23.752	39.799	56.298	20.489
548.03	50.197	61.822	37.185	65.418	51.782	73.076	48.345	68.097	40.421	68.242	56.848	46.849	31.186	58.283	63.836	66.871	50.796	36.555	55.936	64.176	45.458	76.37	37.889	51.998	39.744	68.193	40.834	71.006	40.162	63.283	15.482	33.465	21.771	40.007	38.73	34.56	53.716	17.656	29.483	31.673	12.296	39.604	25.2	24.15	42.763	23.687	39.749	56.268	20.433
548.46	50.369	61.853	37.318	65.376	51.864	73.105	48.452	68.13	40.542	68.32	56.913	46.967	31.358	58.36	63.878	66.968	50.888	36.635	56.033	64.277	45.563	76.421	37.958	52.016	39.847	68.269	40.895	71.004	40.28	63.321	15.405	33.432	21.714	40.02	38.716	34.496	53.661	17.595	29.401	31.592	12.263	39.486	25.19	24.093	42.666	23.59	39.709	56.191	20.372
548.89	50.517	61.891	37.417	65.402	51.936	73.172	48.596	68.243	40.551	68.421	57.027	47.175	31.517	58.468	63.997	67.091	51.013	36.655	56.102	64.302	45.725	76.491	38.024	52.071	39.965	68.321	40.969	71.063	40.325	63.327	15.381	33.404	21.704	40.084	38.703	34.43	53.632	17.564	29.379	31.58	12.274	39.476	25.18	24.104	42.695	23.578	39.712	56.236	20.297
549.32	50.574	61.852	37.395	65.419	52.019	73.14	48.724	68.273	40.593	68.497	57.036	47.231	31.626	58.479	64.007	67.082	51.019	36.698	56.187	64.325	45.82	76.506	38.103	52.101	40.01	68.346	41.053	71.098	40.413	63.342	15.346	33.344	21.686	40.109	38.7	34.36	53.566	17.534	29.375	31.57	12.264	39.476	25.18	24.062	42.682	23.542	39.728	56.268	20.276
549.74	50.607	61.856	37.407	65.469	52.104	73.187	48.805	68.351	40.618	68.473	57.099	47.306	31.679	58.433	64.094	67.007	51.028	36.649	56.227	64.383	45.875	76.532	38.16	52.07	40.056	68.304	41.067	71.079	40.382	63.379	15.319	33.295	21.65	40.104	38.671	34.302	53.55	17.525	29.345	31.51	12.222	39.405	25.173	24.013	42.655	23.509	39.696	56.274	20.244
550.17	50.646	61.855	37.421	65.439	52.112	73.194	48.888	68.406	40.579	68.486	57.123	47.305	31.745	58.431	64.136	66.99	51.007	36.631	56.264	64.317	45.964	76.448	38.152	52.093	40.096	68.269	41.027	70.975	40.522	63.355	15.223	33.213	21.62	40.135	38.616	34.226	53.499	17.484	29.301	31.413	12.195	39.277	25.109	23.994	42.644	23.47	39.679	56.322	20.191
550.6	50.827	61.876	37.465	65.519	52.151	73.181	49.005	68.462	40.621	68.489	57.175	47.474	31.861	58.527	64.221	67	50.99	36.645	56.314	64.354	46.07	76.5	38.227	52.154	40.196	68.27	41.038	71.041	40.583	63.304	15.174	33.158	21.589	40.184	38.578	34.203	53.516	17.413	29.231	31.315	12.122	39.212	25.059	23.977	42.603	23.375	39.63	56.325	20.141
551.03	50.979	62.008	37.509	65.624	52.274	73.171	49.146	68.592	40.657	68.506	57.341	47.561	32.03	58.605	64.255	67.054	51.042	36.747	56.399	64.385	46.263	76.567	38.302	52.272	40.305	68.33	41.068	70.965	40.636	63.397	15.126	33.131	21.579	40.243	38.577	34.143	53.579	17.383	29.196	31.319	12.093	39.175	25.032	23.968	42.603	23.351	39.621	56.364	20.084
551.45	50.925	61.938	37.483	65.386	52.183	73.079	49.144	68.483	40.62	68.446	57.295	47.532	32.074	58.504	64.132	67.006	50.984	36.662	56.322	64.277	46.247	76.517	38.238	52.197	40.326	68.164	40.946	70.859	40.565	63.313	15.063	33.055	21.494	40.201	38.499	34.019	53.534	17.325	29.089	31.244	12.021	39.139	24.963	23.889	42.56	23.293	39.563	56.264	20.04
551.88	51.02	61.965	37.435	65.448	52.287	73.045	49.247	68.547	40.665	68.564	57.394	47.568	32.306	58.544	64.158	67.042	51.006	36.657	56.29	64.276	46.344	76.601	38.324	52.229	40.361	68.185	40.937	70.863	40.613	63.333	15.013	32.996	21.458	40.177	38.418	33.949	53.466	17.295	29.012	31.195	12.005	39.034	24.939	23.852	42.547	23.227	39.541	56.221	19.964
552.31	51.108	61.997	37.493	65.45	52.37	72.917	49.439	68.608	40.613	68.562	57.486	47.623	32.403	58.559	64.167	67.093	51.026	36.688	56.372	64.315	46.429	76.522	38.396	52.253	40.437	68.267	40.965	70.91	40.674	63.312	14.969	32.954	21.424	40.167	38.359	33.854	53.404	17.264	28.962	31.098	11.952	38.971	24.887	23.804	42.482	23.111	39.503	56.212	19.897
552.73	51.197	61.99	37.559	65.379	52.468	72.992	49.597	68.716	40.652	68.626	57.561	47.677	32.563	58.638	64.236	67.17	51.098	36.668	56.453	64.441	46.486	76.595	38.495	52.346	40.503	68.398	41.046	70.952	40.748	63.435	14.877	32.85	21.323	40.15	38.325	33.722	53.34	17.178	28.885	30.983	11.861	38.856	24.829	23.7	42.365	23.061	39.416	56.163	19.778
553.16	51.262	62.051	37.63	65.339	52.528	73.015	49.757	68.752	40.775	68.712	57.553	47.754	32.724	58.729	64.35	67.169	51.155	36.635	56.495	64.405	46.516	76.568	38.55	52.42	40.574	68.41	41.076	70.971	40.826	63.517	14.798	32.781	21.314	40.19	38.26	33.652	53.282	17.171	28.856	30.949	11.853	38.8	24.785	23.649	42.346	23.01	39.357	56.148	19.781
553.59	51.462	61.95	37.634	65.417	52.548	72.984	49.785	68.78	40.788	68.678	57.545	47.802	32.879	58.676	64.386	67.205	51.281	36.662	56.481	64.394	46.676	76.573	38.561	52.428	40.629	68.253	41.108	71.012	40.815	63.514	14.769	32.731	21.294	40.22	38.177	33.584	53.265	17.167	28.839	30.919	11.858	38.787	24.808	23.63	42.363	22.986	39.38	56.194	19.75
554.02	51.497	62.015	37.676	65.504	52.553	73.042	49.949	68.876	40.822	68.648	57.61	47.861	33.022	58.619	64.469	67.197	51.348	36.653	56.547	64.393	46.783	76.599	38.529	52.427	40.719	68.263	41.172	70.919	40.828	63.587	14.715	32.681	21.244	40.277	38.157	33.504	53.211	17.151	28.868	30.879	11.824	38.757	24.772	23.599	42.372	22.988	39.392	56.231	19.731
554.44	51.581	61.973	37.74	65.462	52.556	72.97	50.073	68.925	40.879	68.656	57.587	47.882	33.241	58.614	64.487	67.129	51.413	36.656	56.58	64.345	46.829	76.526	38.548	52.506	40.729	68.316	41.235	70.926	40.855	63.52	14.675	32.631	21.228	40.291	38.155	33.438	53.14	17.117	28.829	30.771	11.781	38.699	24.767	23.55	42.377	22.95	39.373	56.196	19.658
554.87	51.609	61.999	37.782	65.492	52.565	72.994	50.228	68.798	40.85	68.687	57.611	47.982	33.389	58.643	64.567	67.132	51.445	36.739	56.615	64.518	46.881	76.572	38.583	52.593	40.817	68.311	41.311	70.908	40.847	63.492	14.676	32.613	21.232	40.331	38.161	33.388	53.158	17.145	28.816	30.714	11.746	38.655	24.827	23.543	42.427	22.925	39.372	56.186	19.692
555.3	51.668	61.898	37.789	65.46	52.503	72.959	50.283	68.823	40.788	68.612	57.509	47.997	33.523	58.615	64.607	67.06	51.421	36.751	56.547	64.401	46.88	76.567	38.612	52.631	40.825	68.353	41.213	70.85	40.905	63.389	14.655	32.558	21.204	40.342	38.111	33.307	53.129	17.098	28.755	30.665	11.727	38.586	24.82	23.526	42.436	22.892	39.309	56.216	19.622
555.72	51.712	61.902	37.813	65.47	52.524	72.972	50.38	68.842	40.889	68.711	57.599	48.025	33.58	58.61	64.628	67.132	51.486	36.735	56.52	64.392	46.943	76.569	38.633	52.653	40.881	68.311	41.284	70.843	40.888	63.463	14.578	32.485	21.144	40.29	38.044	33.233	53.064	17.053	28.657	30.585	11.693	38.529	24.77	23.501	42.406	22.806	39.225	56.169	19.525
556.15	51.71	61.903	37.891	65.552	52.614	73.039	50.535	68.981	40.928	68.696	57.58	48.144	33.717	58.615	64.637	67.254	51.568	36.718	56.516	64.448	46.994	76.544	38.675	52.618	40.94	68.367	41.277	70.865	40.916	63.44	14.557	32.427	21.096	40.335	38.027	33.171	53.079	16.993	28.59	30.52	11.647	38.48	24.753	23.469	42.415	22.758	39.202	56.257	19.459
556.58	51.732	61.929	37.936	65.572	52.692	73.185	50.669	69.171	40.981	68.72	57.662	48.277	33.841	58.634	64.712	67.317	51.615	36.737	56.538	64.493	47.105	76.538	38.757	52.667	40.986	68.42	41.307	70.891	40.933	63.467	14.531	32.374	21.062	40.335	38.001	33.099	53.033	16.963	28.561	30.476	11.613	38.455	24.705	23.452	42.452	22.741	39.182	56.336	19.416
557	51.71	61.853	37.961	65.482	52.708	73.086	50.785	69.156	41.063	68.737	57.714	48.274	33.972	58.674	64.607	67.29	51.647	36.748	56.505	64.417	47.056	76.472	38.803	52.671	41.014	68.388	41.26	70.882	40.939	63.44	14.458	32.229	21.024	40.291	37.919	33.041	52.991	16.92	28.512	30.389	11.563	38.371	24.657	23.391	42.337	22.697	39.135	56.288	19.393
557.43	51.781	61.921	38.059	65.489	52.707	73.12	50.95	69.256	41.099	68.767	57.789	48.361	34.145	58.762	64.692	67.335	51.715	36.742	56.525	64.45	47.077	76.517	38.875	52.766	41.036	68.438	41.248	70.846	40.945	63.452	14.405	32.207	21.008	40.353	37.899	32.979	53.009	16.854	28.485	30.326	11.508	38.308	24.619	23.363	42.326	22.63	39.128	56.29	19.335
557.86	51.839	61.974	38.148	65.531	52.826	73.198	51.13	69.223	41.147	68.846	57.784	48.451	34.349	58.813	64.723	67.534	51.799	36.81	56.558	64.485	47.148	76.559	38.863	52.795	41.084	68.568	41.312	70.895	41.031	63.512	14.367	32.193	21	40.362	37.882	32.908	52.961	16.844	28.436	30.286	11.486	38.252	24.592	23.334	42.327	22.611	39.143	56.303	19.291
558.28	51.974	61.966	38.157	65.597	52.818	73.24	51.289	69.207	41.16	68.919	57.841	48.572	34.489	58.922	64.767	67.591	51.871	36.839	56.569	64.537	47.181	76.653	38.907	52.791	41.143	68.666	41.255	71.019	41.064	63.51	14.389	32.181	20.965	40.414	37.887	32.877	53.011	16.821	28.401	30.261	11.441	38.254	24.572	23.325	42.299	22.573	39.144	56.272	19.223
558.71	51.95	61.97	38.238	65.571	52.889	73.348	51.423	69.256	41.224	68.931	57.979	48.631	34.659	59.028	64.757	67.665	51.992	36.927	56.637	64.604	47.237	76.743	38.914	52.802	41.13	68.705	41.323	71.049	41.099	63.591	14.393	32.175	20.938	40.459	37.886	32.828	52.962	16.818	28.373	30.267	11.456	38.203	24.59	23.289	42.338	22.574	39.177	56.216	19.211
559.14	51.951	61.907	38.3	65.565	52.954	73.401	51.534	69.33	41.203	68.974	57.963	48.744	34.814	59.049	64.825	67.78	52.094	36.921	56.751	64.65	47.305	76.764	38.993	52.903	41.148	68.659	41.432	71.076	41.072	63.614	14.389	32.091	20.909	40.483	37.83	32.81	52.905	16.779	28.302	30.225	11.422	38.152	24.584	23.264	42.333	22.551	39.133	56.205	19.196
559.56	52.108	61.936	38.332	65.738	53.01	73.436	51.661	69.434	41.24	69.017	58.081	48.865	34.908	59.143	64.952	67.78	52.229	36.902	56.867	64.74	47.395	76.76	39.103	52.996	41.2	68.729	41.51	71.133	41.25	63.658	14.365	32.072	20.873	40.536	37.798	32.802	52.896	16.783	28.278	30.139	11.429	38.102	24.608	23.268	42.327	22.499	39.14	56.232	19.153
559.99	52.233	61.993	38.469	65.828	53.126	73.577	51.823	69.562	41.378	69.105	58.178	49.086	35.058	59.275	65.063	67.9	52.312	36.935	57.025	64.953	47.545	76.829	39.109	53.108	41.259	68.851	41.588	71.263	41.308	63.694	14.309	32.033	20.851	40.555	37.753	32.771	52.904	16.736	28.275	30.098	11.39	38.072	24.579	23.237	42.286	22.47	39.137	56.23	19.147
560.41	52.279	61.985	38.568	65.793	53.165	73.649	51.934	69.608	41.469	69.103	58.232	49.103	35.212	59.363	65.105	67.918	52.355	36.955	57.052	65.027	47.608	76.894	39.108	53.231	41.298	68.876	41.68	71.21	41.358	63.719	14.269	31.994	20.841	40.603	37.779	32.75	52.917	16.727	28.225	30.039	11.39	38.061	24.592	23.265	42.338	22.466	39.125	56.307	19.148
560.84	52.33	62.042	38.594	65.81	53.159	73.715	52.003	69.676	41.472	69.097	58.284	49.173	35.285	59.291	65.131	67.883	52.316	36.951	57.038	64.981	47.701	76.899	39.082	53.224	41.391	68.829	41.764	71.153	41.389	63.716	14.227	32.003	20.804	40.614	37.727	32.709	52.903	16.708	28.198	30.036	11.376	38.033	24.556	23.24	42.358	22.427	39.126	56.269	19.116
561.27	52.477	62.146	38.688	65.844	53.228	73.798	52.112	69.812	41.49	69.132	58.382	49.252	35.444	59.3	65.237	68.094	52.376	36.994	57.083	65.035	47.828	77.027	39.107	53.254	41.479	68.868	41.796	71.224	41.456	63.795	14.203	32.001	20.782	40.562	37.746	32.722	52.843	16.692	28.145	29.998	11.34	38.008	24.547	23.225	42.292	22.387	39.14	56.285	19.051
561.69	52.564	62.283	38.695	65.824	53.275	73.906	52.278	69.885	41.614	69.135	58.447	49.264	35.57	59.486	65.332	68.196	52.412	37.018	57.14	65.078	47.858	77.094	39.195	53.359	41.517	68.981	41.843	71.199	41.533	63.977	14.165	31.953	20.771	40.635	37.725	32.68	52.784	16.642	28.115	29.95	11.323	37.966	24.485	23.209	42.234	22.336	39.162	56.285	18.996
562.12	52.585	62.211	38.601	65.716	53.274	73.755	52.267	69.797	41.592	68.993	58.398	49.271	35.619	59.465	65.292	68.181	52.345	36.976	57.042	65.038	47.811	77.043	39.311	53.316	41.445	68.878	41.842	71.189	41.556	63.875	14.144	31.933	20.755	40.669	37.666	32.7	52.807	16.612	28.062	29.928	11.285	37.899	24.479	23.179	42.251	22.304	39.131	56.251	18.967
562.55	52.593	62.255	38.547	65.771	53.31	73.754	52.371	69.896	41.603	69.097	58.477	49.272	35.707	59.533	65.354	68.338	52.362	36.946	57.073	65.061	47.816	77.17	39.367	53.235	41.453	68.855	41.818	71.168	41.584	63.95	14.117	31.894	20.736	40.704	37.606	32.658	52.831	16.594	28.006	29.933	11.238	37.852	24.436	23.163	42.269	22.274	39.124	56.311	18.962
562.97	52.682	62.307	38.574	65.772	53.361	73.675	52.424	69.98	41.631	69.064	58.473	49.322	35.79	59.492	65.318	68.35	52.45	36.909	57.078	64.999	47.829	77.205	39.438	53.199	41.494	68.918	41.768	71.219	41.698	64.039	14.094	31.909	20.708	40.766	37.603	32.686	52.833	16.575	27.998	29.91	11.227	37.843	24.383	23.176	42.255	22.275	39.114	56.347	18.918
563.4	52.808	62.376	38.562	65.857	53.442	73.683	52.541	70.027	41.676	69.127	58.549	49.447	35.961	59.559	65.348	68.491	52.6	36.967	57.18	65.078	47.925	77.289	39.531	53.319	41.612	68.915	41.877	71.279	41.737	64.193	14.088	31.894	20.687	40.778	37.588	32.669	52.871	16.553	27.999	29.889	11.212	37.878	24.361	23.153	42.272	22.277	39.175	56.376	18.909
563.82	52.947	62.419	38.552	65.917	53.53	73.786	52.6	70.117	41.695	69.102	58.608	49.51	36.083	59.593	65.404	68.545	52.586	37.006	57.185	65.162	47.996	77.35	39.595	53.346	41.667	68.996	41.906	71.356	41.793	64.299	14.079	31.877	20.661	40.835	37.585	32.651	52.901	16.557	27.992	29.865	11.186	37.861	24.382	23.106	42.307	22.274	39.205	56.454	18.913
564.25	53.021	62.485	38.546	65.897	53.512	73.799	52.649	70.081	41.642	69.134	58.7	49.525	36.132	59.589	65.436	68.54	52.58	37.009	57.21	65.158	48.037	77.42	39.552	53.434	41.71	68.985	41.919	71.38	41.801	64.363	14.029	31.841	20.633	40.796	37.51	32.616	52.849	16.524	27.937	29.853	11.173	37.801	24.353	23.095	42.258	22.274	39.159	56.382	18.911
564.68	53.079	62.542	38.606	65.964	53.572	73.689	52.743	70.052	41.704	69.142	58.733	49.478	36.264	59.619	65.431	68.592	52.599	37.081	57.175	65.048	48.039	77.402	39.562	53.483	41.735	68.961	41.853	71.378	41.855	64.376	13.997	31.836	20.636	40.844	37.465	32.595	52.839	16.498	27.915	29.86	11.18	37.778	24.348	23.074	42.256	22.257	39.151	56.373	18.919
565.1	53.228	62.625	38.649	66.166	53.725	73.818	52.794	70.165	41.76	69.2	58.759	49.564	36.438	59.646	65.613	68.74	52.674	37.049	57.301	65.222	48.129	77.433	39.656	53.545	41.827	69.033	41.946	71.42	41.932	64.469	13.985	31.862	20.622	40.925	37.491	32.597	52.829	16.494	27.909	29.86	11.137	37.795	24.351	23.061	42.33	22.246	39.155	56.392	18.911
565.53	53.325	62.677	38.68	66.306	53.864	73.885	52.819	70.185	41.848	69.305	58.764	49.656	36.577	59.61	65.657	68.833	52.679	37.101	57.311	65.326	48.203	77.527	39.707	53.62	41.961	69.107	42.042	71.465	41.964	64.581	13.976	31.846	20.583	40.939	37.444	32.588	52.783	16.501	27.851	29.837	11.117	37.738	24.336	23.03	42.305	22.263	39.124	56.425	18.906
565.95	53.48	62.66	38.736	66.281	53.816	73.945	52.866	70.331	41.838	69.362	58.848	49.689	36.659	59.676	65.708	68.829	52.711	37.106	57.392	65.362	48.252	77.518	39.781	53.706	42.039	69.068	42.036	71.477	42.007	64.565	13.976	31.859	20.548	41.003	37.454	32.595	52.753	16.483	27.836	29.834	11.113	37.714	24.318	23.05	42.303	22.219	39.134	56.465	18.873
566.38	53.56	62.731	38.864	66.307	53.954	74.01	52.925	70.463	42.009	69.29	58.993	49.766	36.918	59.706	65.828	68.984	52.768	37.136	57.529	65.477	48.384	77.561	39.905	53.86	42.128	69.11	42.178	71.488	42.132	64.705	13.967	31.86	20.553	41.028	37.439	32.589	52.761	16.491	27.813	29.83	11.144	37.678	24.315	23.02	42.307	22.236	39.166	56.498	18.891
566.8	53.624	62.73	38.884	66.393	53.977	74.011	52.932	70.518	42.029	69.302	58.94	49.755	37.044	59.677	65.857	69.016	52.746	37.037	57.489	65.507	48.461	77.479	39.939	53.951	42.172	69.045	42.195	71.423	42.185	64.673	13.964	31.869	20.572	41.114	37.44	32.566	52.807	16.473	27.814	29.816	11.12	37.72	24.293	23.042	42.315	22.249	39.147	56.642	18.877
567.23	53.694	62.694	38.886	66.388	54.027	73.966	52.998	70.463	42.082	69.296	59.019	49.776	37.12	59.722	65.845	68.968	52.719	37.021	57.463	65.479	48.444	77.4	39.93	53.966	42.261	69.061	42.203	71.441	42.231	64.678	13.95	31.921	20.607	41.168	37.44	32.538	52.839	16.467	27.847	29.807	11.139	37.718	24.268	23.049	42.332	22.246	39.185	56.662	18.877
567.65	53.734	62.691	38.932	66.394	54.087	73.982	53.072	70.394	42.138	69.335	59.018	49.803	37.265	59.699	65.848	69.054	52.705	37.053	57.423	65.526	48.487	77.366	39.968	53.967	42.294	69.157	42.263	71.461	42.205	64.732	13.969	31.885	20.652	41.213	37.46	32.516	52.867	16.459	27.851	29.861	11.135	37.729	24.255	23.06	42.364	22.299	39.147	56.734	18.888
568.08	53.711	62.663	38.928	66.438	54.074	73.909	53.108	70.423	42.168	69.348	59.025	49.76	37.358	59.619	65.863	69.056	52.723	37.041	57.373	65.445	48.443	77.361	40.048	53.998	42.367	69.164	42.286	71.397	42.205	64.815	14.025	31.909	20.672	41.252	37.46	32.516	52.858	16.482	27.844	29.882	11.157	37.795	24.289	23.092	42.394	22.333	39.168	56.768	18.874
568.51	53.763	62.678	38.941	66.521	54.173	73.954	53.133	70.422	42.189	69.381	58.99	49.875	37.461	59.551	65.884	69.101	52.777	37.067	57.399	65.441	48.535	77.406	40.083	54.004	42.433	69.178	42.286	71.444	42.227	64.876	14.009	31.893	20.65	41.251	37.397	32.548	52.835	16.453	27.84	29.891	11.161	37.798	24.258	23.054	42.338	22.358	39.143	56.726	18.845
568.93	53.801	62.673	38.953	66.448	54.199	73.895	53.174	70.435	42.237	69.394	59.019	49.911	37.634	59.63	65.887	69.139	52.78	37.141	57.425	65.481	48.543	77.422	40.166	54.059	42.458	69.189	42.234	71.477	42.258	64.869	14.028	31.891	20.678	41.364	37.437	32.595	52.867	16.433	27.843	29.937	11.181	37.83	24.28	23.04	42.376	22.372	39.191	56.811	18.87
569.36	53.856	62.613	38.983	66.462	54.241	73.871	53.23	70.456	42.283	69.424	59.077	49.928	37.705	59.659	65.895	69.106	52.811	37.146	57.488	65.537	48.598	77.403	40.212	54.15	42.535	69.178	42.265	71.498	42.292	64.859	14.047	31.881	20.66	41.443	37.456	32.582	52.94	16.422	27.841	29.947	11.163	37.819	24.281	23.048	42.45	22.421	39.211	56.855	18.892
569.78	53.852	62.594	39.042	66.482	54.261	73.811	53.24	70.42	42.247	69.43	59.124	49.981	37.828	59.564	65.917	69.124	52.837	37.115	57.5	65.57	48.66	77.401	40.216	54.088	42.623	69.112	42.245	71.545	42.352	64.853	14.073	31.947	20.674	41.419	37.465	32.599	52.968	16.438	27.837	29.99	11.159	37.815	24.282	23.049	42.486	22.447	39.159	56.843	18.905
570.21	53.851	62.7	39.144	66.598	54.301	73.944	53.329	70.497	42.317	69.586	59.203	50.001	37.974	59.672	65.956	69.191	52.921	37.199	57.638	65.627	48.779	77.406	40.248	54.178	42.794	69.238	42.317	71.638	42.388	64.914	14.087	31.95	20.693	41.422	37.49	32.574	52.967	16.436	27.822	30.009	11.154	37.811	24.266	23.046	42.442	22.452	39.162	56.886	18.897
570.63	53.916	62.664	39.221	66.639	54.298	74.025	53.354	70.511	42.343	69.529	59.22	50.065	38.076	59.698	65.933	69.192	52.976	37.277	57.653	65.743	48.859	77.411	40.305	54.284	42.94	69.27	42.37	71.746	42.395	64.952	14.104	31.969	20.7	41.435	37.507	32.603	52.981	16.433	27.848	30.025	11.19	37.84	24.26	23.048	42.44	22.464	39.166	56.839	18.888
571.06	53.978	62.706	39.252	66.644	54.401	74.113	53.357	70.5	42.407	69.617	59.317	50.086	38.183	59.786	66.056	69.327	52.915	37.295	57.76	65.732	48.969	77.41	40.311	54.307	42.99	69.283	42.47	71.749	42.348	65.054	14.098	31.956	20.735	41.408	37.496	32.573	52.956	16.446	27.806	30.068	11.198	37.846	24.228	23.012	42.41	22.467	39.159	56.871	18.858
571.48	54.059	62.766	39.318	66.686	54.486	74.205	53.452	70.563	42.561	69.691	59.407	50.12	38.302	59.847	66.137	69.35	52.936	37.33	57.838	65.901	49.076	77.459	40.323	54.276	43.031	69.332	42.474	71.805	42.419	65.071	14.103	32.001	20.756	41.423	37.497	32.577	52.935	16.466	27.81	30.118	11.22	37.821	24.261	23.023	42.413	22.472	39.152	56.897	18.89
571.91	54.102	62.799	39.386	66.767	54.529	74.24	53.46	70.636	42.551	69.739	59.467	50.197	38.465	59.935	66.224	69.418	53.018	37.358	57.915	65.882	49.171	77.492	40.372	54.368	43.092	69.284	42.504	71.781	42.468	65.088	14.106	32.049	20.797	41.472	37.511	32.577	52.954	16.463	27.831	30.191	11.267	37.848	24.247	23.009	42.401	22.498	39.162	56.877	18.9
572.33	54.176	62.805	39.449	66.739	54.601	74.22	53.516	70.663	42.66	69.829	59.513	50.239	38.588	59.979	66.353	69.512	53.071	37.378	57.931	65.926	49.231	77.533	40.449	54.444	43.18	69.286	42.597	71.807	42.508	65.089	14.176	32.093	20.857	41.586	37.566	32.667	53.024	16.523	27.863	30.264	11.329	37.906	24.265	23.026	42.469	22.523	39.27	56.961	18.943
572.76	54.188	62.712	39.443	66.761	54.581	74.314	53.583	70.667	42.606	69.812	59.579	50.329	38.631	60.014	66.398	69.522	53.06	37.333	57.955	66.005	49.236	77.551	40.487	54.486	43.265	69.293	42.631	71.823	42.521	65.167	14.226	32.151	20.897	41.632	37.616	32.731	53.106	16.576	27.911	30.295	11.357	37.975	24.284	23.05	42.474	22.591	39.315	56.995	18.957
573.18	54.118	62.672	39.507	66.618	54.48	74.338	53.637	70.62	42.58	69.806	59.614	50.331	38.628	60.009	66.337	69.469	53.029	37.349	57.917	65.941	49.21	77.552	40.47	54.518	43.309	69.253	42.585	71.857	42.457	65.19	14.315	32.186	20.948	41.656	37.621	32.784	53.171	16.583	27.922	30.37	11.43	38.007	24.274	23.069	42.485	22.633	39.319	57.058	18.968
573.61	54.188	62.646	39.531	66.565	54.472	74.325	53.771	70.72	42.581	69.812	59.739	50.313	38.74	60.046	66.406	69.474	53.138	37.303	57.953	65.904	49.253	77.522	40.527	54.507	43.291	69.174	42.611	71.882	42.532	65.178	14.343	32.228	20.989	41.737	37.644	32.823	53.262	16.599	27.974	30.471	11.49	38.057	24.306	23.094	42.53	22.672	39.373	57.072	19
574.03	54.18	62.676	39.521	66.571	54.567	74.298	53.863	70.718	42.654	69.85	59.788	50.385	38.867	60.088	66.402	69.536	53.144	37.345	57.96	65.954	49.315	77.595	40.58	54.52	43.366	69.232	42.646	72.001	42.61	65.262	14.387	32.257	21.032	41.766	37.636	32.881	53.258	16.611	27.988	30.516	11.527	38.114	24.307	23.093	42.568	22.732	39.41	57.055	19.036
574.46	54.14	62.654	39.495	66.52	54.497	74.24	53.863	70.697	42.557	69.871	59.771	50.371	38.859	60.042	66.293	69.43	53.111	37.269	57.857	65.845	49.264	77.494	40.513	54.537	43.328	69.18	42.659	71.931	42.504	65.152	14.42	32.3	21.076	41.804	37.689	32.916	53.27	16.635	28.045	30.618	11.542	38.195	24.358	23.12	42.597	22.769	39.432	57.098	19.024
574.88	54.18	62.659	39.538	66.461	54.499	74.27	53.916	70.767	42.624	69.965	59.898	50.428	38.893	60.09	66.347	69.398	53.163	37.373	57.93	65.858	49.245	77.544	40.549	54.515	43.356	69.271	42.678	72.02	42.521	65.23	14.44	32.321	21.086	41.772	37.681	32.972	53.303	16.667	28.054	30.695	11.574	38.17	24.398	23.117	42.63	22.791	39.451	57.05	19.018
575.31	54.182	62.765	39.613	66.52	54.468	74.339	53.925	70.8	42.653	69.994	59.952	50.434	38.955	60.117	66.371	69.422	53.186	37.371	57.875	65.883	49.242	77.603	40.574	54.486	43.324	69.322	42.659	72.065	42.535	65.244	14.487	32.362	21.088	41.812	37.698	33.06	53.338	16.709	28.063	30.819	11.598	38.214	24.44	23.123	42.641	22.853	39.496	57.065	19.024
575.73	54.204	62.824	39.686	66.573	54.563	74.424	53.999	70.974	42.711	70.005	60.08	50.564	39.13	60.19	66.424	69.488	53.204	37.435	57.999	65.928	49.325	77.675	40.591	54.578	43.497	69.365	42.724	72.148	42.573	65.287	14.522	32.443	21.127	41.88	37.722	33.167	53.377	16.753	28.103	30.879	11.65	38.264	24.465	23.132	42.643	22.896	39.595	57.059	19.042
576.15	54.334	62.926	39.8	66.638	54.625	74.534	54.065	71.072	42.776	70.044	60.11	50.705	39.279	60.299	66.518	69.572	53.239	37.517	58.119	66.046	49.514	77.739	40.642	54.68	43.539	69.446	42.817	72.22	42.655	65.264	14.548	32.532	21.163	41.958	37.791	33.284	53.502	16.795	28.138	30.966	11.711	38.27	24.49	23.14	42.679	22.94	39.662	57.134	19.092
576.58	54.369	62.972	39.82	66.599	54.627	74.579	54.156	71.137	42.843	70.06	60.223	50.721	39.393	60.405	66.566	69.653	53.263	37.495	58.153	66.107	49.508	77.751	40.665	54.78	43.559	69.49	42.86	72.293	42.703	65.269	14.63	32.66	21.256	42.039	37.859	33.361	53.584	16.856	28.195	31.11	11.788	38.365	24.556	23.193	42.779	23.023	39.738	57.19	19.15
577	54.453	62.953	39.914	66.683	54.72	74.633	54.233	71.191	42.908	70.112	60.242	50.765	39.466	60.443	66.702	69.776	53.347	37.516	58.222	66.215	49.632	77.81	40.671	54.854	43.64	69.549	42.895	72.303	42.764	65.413	14.717	32.726	21.311	42.024	37.814	33.471	53.637	16.949	28.215	31.126	11.848	38.4	24.58	23.222	42.83	23.044	39.734	57.174	19.156
577.43	54.462	63.018	39.966	66.763	54.737	74.639	54.28	71.183	42.908	70.114	60.266	50.881	39.613	60.484	66.673	69.804	53.355	37.53	58.177	66.232	49.58	77.87	40.687	54.85	43.639	69.552	42.94	72.3	42.798	65.432	14.773	32.821	21.37	42.088	37.832	33.579	53.69	16.979	28.292	31.234	11.914	38.509	24.611	23.254	42.836	23.073	39.75	57.154	19.182
577.85	54.495	62.968	39.975	66.796	54.82	74.672	54.363	71.253	42.962	70.154	60.256	50.881	39.708	60.458	66.628	69.88	53.345	37.6	58.227	66.275	49.61	77.879	40.692	55.002	43.671	69.661	42.995	72.358	42.774	65.419	14.865	32.912	21.439	42.204	37.874	33.722	53.778	17.045	28.333	31.347	12.015	38.616	24.676	23.296	42.864	23.185	39.83	57.25	19.216
578.28	54.607	63.025	40.007	66.861	54.953	74.782	54.442	71.362	43.031	70.185	60.365	50.999	39.846	60.506	66.709	70.026	53.389	37.561	58.234	66.312	49.587	78.021	40.725	55.07	43.667	69.702	43.072	72.417	42.838	65.563	14.944	33.045	21.521	42.3	37.946	33.894	53.849	17.108	28.396	31.484	12.099	38.741	24.754	23.373	42.939	23.271	39.916	57.286	19.271
578.7	54.655	63.096	40.02	66.814	54.935	74.73	54.491	71.355	43.058	70.201	60.403	51.006	39.933	60.511	66.741	70.007	53.418	37.495	58.206	66.303	49.697	78.008	40.72	55.041	43.597	69.706	42.987	72.36	42.861	65.563	15.036	33.163	21.598	42.367	37.985	33.998	53.888	17.205	28.428	31.577	12.185	38.772	24.827	23.427	42.946	23.379	39.948	57.304	19.333
579.12	54.667	62.989	40.016	66.783	54.803	74.595	54.537	71.333	43.047	70.073	60.358	50.978	40.041	60.454	66.719	69.835	53.471	37.439	58.053	66.27	49.645	77.986	40.703	55.044	43.639	69.577	42.908	72.259	42.879	65.414	15.143	33.265	21.626	42.448	38.049	34.159	53.997	17.255	28.512	31.675	12.255	38.828	24.904	23.497	43.022	23.473	40.001	57.326	19.387
579.55	54.725	62.984	40.075	66.783	54.836	74.518	54.551	71.376	42.998	70.053	60.37	51.024	40.138	60.472	66.723	69.931	53.469	37.394	57.995	66.22	49.665	77.925	40.768	55.076	43.682	69.546	42.977	72.241	42.881	65.382	15.24	33.357	21.707	42.539	38.136	34.322	54.025	17.32	28.576	31.771	12.313	38.905	24.957	23.539	43.063	23.555	40.069	57.344	19.429
579.97	54.716	63.025	40.064	66.797	54.863	74.491	54.627	71.426	42.982	70.075	60.436	51.049	40.232	60.498	66.775	69.926	53.453	37.342	57.99	66.223	49.661	77.875	40.793	55.079	43.705	69.593	43.036	72.293	42.906	65.394	15.371	33.458	21.778	42.568	38.201	34.484	54.063	17.396	28.606	31.902	12.394	39.003	25.047	23.627	43.085	23.668	40.138	57.375	19.488
580.4	54.709	63.03	40.06	66.79	54.821	74.54	54.611	71.456	42.984	70.042	60.464	51.037	40.331	60.523	66.688	69.927	53.478	37.349	58.028	66.188	49.62	77.865	40.816	55.062	43.704	69.599	43.032	72.282	42.955	65.509	15.471	33.596	21.834	42.648	38.291	34.578	54.158	17.474	28.689	32.064	12.469	39.105	25.138	23.671	43.132	23.759	40.178	57.374	19.529
580.82	54.777	63.085	40.102	66.795	54.879	74.585	54.641	71.51	43.038	70.106	60.481	51.102	40.483	60.538	66.74	69.991	53.506	37.399	58.101	66.227	49.673	78.028	40.857	55.112	43.757	69.659	43.135	72.319	42.981	65.522	15.567	33.688	21.899	42.72	38.299	34.706	54.195	17.529	28.722	32.201	12.559	39.184	25.174	23.691	43.195	23.828	40.213	57.361	19.567
581.25	54.899	63.141	40.095	66.904	54.918	74.58	54.632	71.585	43.043	70.11	60.554	51.138	40.569	60.515	66.768	69.984	53.514	37.381	58.143	66.223	49.723	78.089	40.845	55.119	43.755	69.678	43.188	72.239	43.107	65.549	15.654	33.828	21.964	42.819	38.336	34.849	54.265	17.617	28.793	32.356	12.625	39.329	25.316	23.751	43.257	23.949	40.309	57.369	19.63
581.67	54.875	63.152	40.111	66.866	54.883	74.585	54.567	71.523	43.026	70.081	60.543	51.189	40.625	60.504	66.763	69.999	53.497	37.434	58.116	66.236	49.73	78.057	40.806	55.12	43.795	69.73	43.116	72.248	43.019	65.511	15.784	33.948	22.055	42.87	38.468	35.048	54.35	17.735	28.903	32.478	12.725	39.474	25.376	23.797	43.326	24.081	40.39	57.421	19.683
582.09	54.881	63.113	40.221	66.862	54.881	74.585	54.547	71.524	42.944	70.027	60.561	51.186	40.696	60.464	66.773	70.024	53.527	37.397	58.116	66.164	49.731	77.995	40.843	55.206	43.758	69.676	43.105	72.169	42.967	65.475	15.906	34.079	22.142	42.955	38.543	35.17	54.415	17.847	29.005	32.662	12.804	39.567	25.464	23.862	43.357	24.199	40.389	57.428	19.727
582.52	55.032	63.115	40.287	66.942	54.969	74.628	54.608	71.602	42.96	70.093	60.604	51.209	40.812	60.485	66.839	70.119	53.596	37.498	58.148	66.225	49.824	78.112	40.916	55.235	43.81	69.697	43.106	72.28	43.026	65.577	16.069	34.244	22.21	43.055	38.575	35.353	54.505	17.945	29.076	32.808	12.897	39.7	25.539	23.912	43.392	24.32	40.509	57.427	19.808
582.94	55.094	63.122	40.31	66.959	55.038	74.618	54.631	71.564	42.934	70.028	60.589	51.24	40.901	60.418	66.866	70.136	53.578	37.446	58.103	66.306	49.891	78.144	40.974	55.249	43.911	69.656	43.138	72.289	43.038	65.614	16.212	34.394	22.328	43.159	38.679	35.523	54.569	18.074	29.243	32.989	13.011	39.866	25.622	23.996	43.443	24.459	40.636	57.459	19.938
583.36	55.2	63.092	40.358	66.962	55.042	74.547	54.686	71.656	42.949	70.03	60.653	51.216	41.019	60.331	66.89	70.222	53.62	37.495	58.127	66.354	49.961	78.149	41.023	55.307	43.92	69.629	43.184	72.239	43.09	65.632	16.369	34.54	22.448	43.283	38.781	35.738	54.691	18.199	29.377	33.136	13.153	40.064	25.727	24.094	43.545	24.597	40.754	57.508	20.013
583.79	55.266	63.143	40.34	66.901	54.984	74.516	54.758	71.668	42.892	69.946	60.663	51.162	41.052	60.351	66.947	70.192	53.648	37.421	58.012	66.343	49.944	78.157	41.019	55.327	43.805	69.595	43.179	72.167	43.101	65.626	16.524	34.703	22.555	43.35	38.887	35.919	54.764	18.29	29.479	33.331	13.282	40.172	25.818	24.144	43.612	24.726	40.814	57.555	20.093
584.21	55.276	63.084	40.31	66.825	54.916	74.462	54.755	71.552	42.818	69.894	60.752	51.138	41.093	60.274	66.886	70.174	53.595	37.413	57.896	66.269	49.843	78.107	41.049	55.214	43.809	69.47	43.157	72.104	43.056	65.686	16.68	34.834	22.636	43.421	38.97	36.114	54.788	18.396	29.556	33.496	13.364	40.329	25.891	24.244	43.673	24.869	40.871	57.576	20.156
584.64	55.354	63.143	40.389	66.873	54.958	74.496	54.769	71.559	42.843	69.885	60.808	51.175	41.166	60.264	66.95	70.214	53.644	37.48	57.921	66.3	49.894	78.121	41.127	55.174	43.881	69.467	43.21	72.032	43.057	65.685	16.793	34.967	22.681	43.475	39.031	36.245	54.827	18.508	29.651	33.655	13.454	40.44	25.937	24.271	43.66	24.945	40.924	57.578	20.185
585.06	55.362	63.2	40.391	66.916	54.929	74.499	54.776	71.55	42.818	69.874	60.894	51.244	41.258	60.268	66.942	70.169	53.675	37.491	57.915	66.301	49.862	78.125	41.151	55.155	43.894	69.407	43.238	71.974	43.042	65.616	16.931	35.136	22.784	43.558	39.165	36.407	54.882	18.632	29.789	33.893	13.581	40.602	26.053	24.38	43.685	25.128	40.944	57.624	20.276
585.48	55.396	63.15	40.355	66.907	54.911	74.523	54.731	71.589	42.748	69.852	60.878	51.272	41.333	60.244	66.924	70.111	53.716	37.481	57.894	66.359	49.911	78.027	41.192	55.133	43.915	69.363	43.264	71.91	43.039	65.576	17.138	35.293	22.905	43.631	39.23	36.627	54.961	18.782	29.867	34.089	13.736	40.729	26.18	24.434	43.766	25.307	41.021	57.658	20.377
585.91	55.453	63.208	40.472	66.916	54.861	74.558	54.722	71.653	42.675	69.879	60.962	51.347	41.428	60.338	67.016	70.062	53.749	37.486	57.859	66.459	49.945	78.082	41.236	55.078	43.896	69.304	43.332	71.864	43.067	65.576	17.272	35.478	23.012	43.7	39.344	36.857	55.032	18.923	30.016	34.277	13.856	40.864	26.295	24.499	43.826	25.431	41.125	57.652	20.471
586.33	55.49	63.161	40.471	66.81	54.789	74.438	54.694	71.584	42.584	69.91	60.933	51.344	41.49	60.284	66.983	69.959	53.743	37.438	57.829	66.479	49.945	78.035	41.29	55.042	43.825	69.252	43.315	71.816	43.012	65.475	17.435	35.615	23.124	43.768	39.428	37.041	55.093	19.086	30.119	34.492	14.014	41.006	26.406	24.578	43.88	25.573	41.228	57.686	20.559
586.75	55.576	63.221	40.55	66.932	54.94	74.578	54.759	71.663	42.594	69.964	61.033	51.481	41.7	60.369	67.089	70.097	53.86	37.609	57.914	66.57	49.972	78.058	41.339	55.128	43.9	69.245	43.443	71.857	43.035	65.537	17.644	35.824	23.267	43.92	39.575	37.323	55.202	19.237	30.313	34.802	14.193	41.24	26.521	24.683	44.021	25.765	41.38	57.754	20.668
587.18	55.616	63.243	40.573	67.02	55.092	74.698	54.787	71.736	42.643	70.042	61.087	51.638	41.777	60.375	67.124	70.266	53.856	37.657	58.012	66.693	50.041	78.162	41.371	55.234	43.859	69.295	43.545	71.939	43.041	65.595	17.803	36.032	23.433	44.057	39.68	37.556	55.262	19.383	30.445	35.072	14.374	41.461	26.63	24.775	44.089	25.929	41.496	57.812	20.791
587.6	55.575	63.26	40.614	67.003	55.143	74.806	54.842	71.788	42.638	70.178	61.096	51.711	41.903	60.397	67.146	70.313	53.887	37.674	58.018	66.748	50.036	78.236	41.339	55.231	43.831	69.317	43.53	71.975	43.029	65.693	17.975	36.247	23.544	44.161	39.772	37.812	55.392	19.53	30.554	35.334	14.559	41.634	26.727	24.84	44.182	26.1	41.579	57.83	20.871
588.02	55.58	63.162	40.625	66.864	55.013	74.739	54.794	71.66	42.667	70.11	61.064	51.685	41.905	60.328	67	70.23	53.829	37.666	57.981	66.741	50.063	78.206	41.336	55.23	43.788	69.217	43.484	71.865	42.99	65.603	18.174	36.503	23.702	44.333	39.885	38.058	55.537	19.7	30.75	35.597	14.727	41.844	26.857	24.957	44.294	26.266	41.715	57.905	20.981
588.45	55.625	63.219	40.731	67.005	55.107	74.792	54.86	71.739	42.641	70.12	61.088	51.779	42.011	60.33	67.091	70.202	53.844	37.673	58.017	66.803	50.18	78.188	41.425	55.233	43.874	69.281	43.495	71.863	43.03	65.552	18.352	36.725	23.838	44.448	39.997	38.36	55.607	19.833	30.895	35.821	14.912	42.037	26.941	25.065	44.356	26.44	41.824	57.916	21.057
588.87	55.701	63.286	40.819	67.116	55.198	74.827	54.936	71.805	42.661	70.125	61.163	51.785	42.146	60.376	67.16	70.266	53.923	37.651	58.022	66.864	50.232	78.226	41.499	55.35	43.963	69.313	43.508	71.98	43.123	65.611	18.524	36.918	23.989	44.567	40.131	38.625	55.711	19.998	31.069	36.052	15.073	42.269	27.083	25.194	44.428	26.634	41.897	57.926	21.181
589.29	55.686	63.226	40.842	67.084	55.233	74.853	54.98	71.759	42.688	70.142	61.117	51.827	42.301	60.425	67.173	70.344	53.933	37.64	57.952	66.985	50.297	78.268	41.559	55.391	43.972	69.311	43.456	71.994	43.098	65.582	18.734	37.137	24.118	44.663	40.264	38.908	55.823	20.194	31.237	36.285	15.254	42.436	27.189	25.33	44.484	26.809	42.016	57.919	21.291
589.71	55.7	63.267	40.887	67.179	55.328	74.865	55.069	71.815	42.75	70.2	61.198	51.854	42.418	60.502	67.187	70.362	53.962	37.609	58.05	67.021	50.342	78.298	41.606	55.424	44.085	69.316	43.535	72.063	43.154	65.647	18.963	37.343	24.249	44.729	40.307	39.16	55.885	20.337	31.339	36.549	15.418	42.617	27.289	25.459	44.528	26.951	42.104	57.926	21.387
590.14	55.696	63.295	40.832	67.178	55.301	74.83	55.028	71.805	42.833	70.165	61.236	51.844	42.488	60.451	67.202	70.309	53.994	37.622	57.984	67.094	50.389	78.28	41.569	55.375	44.105	69.295	43.577	71.991	43.115	65.615	19.166	37.598	24.407	44.85	40.447	39.474	56.048	20.5	31.473	36.796	15.62	42.833	27.406	25.575	44.617	27.15	42.27	57.997	21.566
590.56	55.643	63.338	40.831	67.224	55.377	74.91	55.121	71.817	42.878	70.174	61.364	51.89	42.625	60.499	67.251	70.358	54.026	37.608	58.087	67.215	50.464	78.331	41.606	55.406	44.214	69.371	43.627	71.997	43.146	65.671	19.333	37.806	24.567	44.947	40.549	39.762	56.163	20.665	31.6	37.055	15.822	43.014	27.525	25.702	44.7	27.295	42.362	58.062	21.69
590.98	55.705	63.4	40.84	67.315	55.417	75.035	55.254	71.868	42.921	70.292	61.489	51.956	42.817	60.651	67.319	70.464	54.081	37.677	58.163	67.26	50.543	78.471	41.659	55.53	44.229	69.469	43.68	72.041	43.229	65.757	19.56	38.062	24.709	45.063	40.68	40.114	56.31	20.802	31.683	37.321	16.015	43.19	27.656	25.808	44.779	27.498	42.462	58.11	21.774
591.41	55.701	63.446	40.822	67.284	55.473	75.19	55.262	71.974	42.938	70.341	61.431	52.078	42.905	60.718	67.331	70.456	54.133	37.655	58.205	67.243	50.563	78.472	41.67	55.557	44.289	69.513	43.759	72.052	43.219	65.815	19.754	38.309	24.865	45.126	40.814	40.406	56.399	20.974	31.812	37.628	16.195	43.357	27.797	25.944	44.866	27.691	42.525	58.175	21.891
591.83	55.735	63.403	40.886	67.376	55.468	75.255	55.33	72.055	42.96	70.453	61.438	52.137	43.065	60.759	67.384	70.515	54.145	37.7	58.259	67.309	50.648	78.586	41.692	55.572	44.332	69.538	43.758	72.089	43.202	65.791	20.017	38.546	25.032	45.235	40.889	40.718	56.545	21.153	31.972	37.882	16.409	43.598	27.97	26.108	44.986	27.875	42.615	58.217	22.013
592.25	55.69	63.457	40.853	67.392	55.482	75.246	55.342	72.127	42.939	70.455	61.422	52.145	43.116	60.723	67.368	70.515	54.197	37.637	58.328	67.333	50.675	78.632	41.648	55.571	44.35	69.569	43.735	72.137	43.221	65.706	20.232	38.787	25.201	45.333	41.006	41.027	56.654	21.332	32.13	38.169	16.649	43.829	28.107	26.23	45.099	28.081	42.708	58.259	22.117
592.67	55.774	63.498	40.809	67.466	55.527	75.314	55.417	72.262	42.909	70.569	61.45	52.187	43.208	60.772	67.388	70.565	54.212	37.658	58.348	67.411	50.693	78.648	41.632	55.616	44.368	69.599	43.743	72.229	43.322	65.778	20.498	39.054	25.387	45.473	41.121	41.403	56.82	21.512	32.286	38.49	16.883	44.072	28.259	26.393	45.292	28.307	42.876	58.29	22.299
593.1	55.795	63.503	40.857	67.489	55.464	75.266	55.448	72.365	42.893	70.579	61.498	52.219	43.291	60.789	67.43	70.618	54.235	37.67	58.403	67.366	50.767	78.664	41.726	55.692	44.409	69.605	43.777	72.306	43.358	65.788	20.78	39.324	25.535	45.619	41.22	41.694	56.957	21.686	32.466	38.769	17.109	44.279	28.373	26.509	45.358	28.472	43.057	58.339	22.436
593.52	55.808	63.513	40.94	67.473	55.486	75.241	55.574	72.465	42.992	70.575	61.557	52.15	43.357	60.792	67.42	70.697	54.318	37.622	58.464	67.392	50.819	78.748	41.719	55.751	44.432	69.613	43.752	72.266	43.337	65.841	21.003	39.59	25.711	45.763	41.36	42.013	57.111	21.907	32.647	39.091	17.354	44.496	28.487	26.679	45.442	28.707	43.217	58.388	22.572
593.94	55.814	63.4	40.848	67.458	55.496	75.184	55.534	72.367	43.004	70.471	61.516	52.096	43.39	60.773	67.368	70.585	54.277	37.524	58.441	67.269	50.785	78.677	41.656	55.694	44.395	69.611	43.653	72.161	43.331	65.756	21.285	39.856	25.873	45.837	41.451	42.341	57.266	22.082	32.825	39.453	17.597	44.742	28.613	26.827	45.559	28.934	43.32	58.461	22.72
594.36	55.814	63.388	40.903	67.58	55.571	75.337	55.611	72.464	43.062	70.453	61.571	52.168	43.506	60.822	67.465	70.645	54.311	37.61	58.492	67.291	50.92	78.737	41.726	55.672	44.497	69.705	43.671	72.193	43.406	65.808	21.542	40.146	26.057	45.986	41.613	42.666	57.435	22.256	33.051	39.758	17.861	44.985	28.752	26.973	45.682	29.169	43.414	58.522	22.869
594.79	55.814	63.32	40.895	67.516	55.545	75.283	55.611	72.441	43.073	70.426	61.562	52.156	43.48	60.846	67.435	70.638	54.261	37.558	58.528	67.257	50.966	78.773	41.668	55.678	44.525	69.757	43.665	72.22	43.419	65.758	21.751	40.416	26.219	46.094	41.728	42.978	57.617	22.46	33.175	40.016	18.077	45.223	28.911	27.099	45.799	29.378	43.534	58.589	23.034
595.21	55.865	63.463	40.965	67.506	55.515	75.38	55.643	72.481	43.093	70.522	61.605	52.174	43.633	60.906	67.479	70.581	54.321	37.652	58.589	67.307	51.044	78.795	41.706	55.678	44.58	69.797	43.677	72.209	43.474	65.842	22.045	40.696	26.378	46.202	41.876	43.306	57.736	22.671	33.371	40.283	18.346	45.464	29.06	27.246	45.943	29.626	43.655	58.628	23.186
595.63	55.865	63.522	40.947	67.502	55.463	75.326	55.627	72.439	43.087	70.406	61.675	52.133	43.696	60.866	67.483	70.521	54.319	37.69	58.64	67.285	51.071	78.778	41.701	55.748	44.609	69.807	43.693	72.192	43.486	65.79	22.303	40.961	26.564	46.315	41.984	43.641	57.845	22.869	33.57	40.597	18.6	45.72	29.195	27.425	46.031	29.87	43.8	58.671	23.345
596.05	55.933	63.598	41.031	67.572	55.566	75.447	55.706	72.564	43.08	70.431	61.716	52.181	43.886	60.861	67.642	70.649	54.366	37.728	58.685	67.376	51.077	78.83	41.747	55.83	44.674	69.869	43.747	72.216	43.568	65.82	22.538	41.145	26.691	46.367	42.091	43.942	57.954	22.998	33.677	40.85	18.841	45.899	29.299	27.505	46.123	30.06	43.858	58.644	23.471
596.48	56.063	63.601	41.021	67.577	55.586	75.463	55.759	72.609	43.105	70.486	61.763	52.14	44.009	60.834	67.678	70.731	54.344	37.778	58.677	67.423	51.133	78.973	41.75	55.854	44.651	69.894	43.794	72.199	43.585	65.874	22.829	41.393	26.909	46.477	42.212	44.282	58.101	23.225	33.843	41.177	19.106	46.134	29.504	27.646	46.272	30.294	44.008	58.788	23.657
596.9	56.041	63.598	41.047	67.485	55.556	75.447	55.728	72.602	43.107	70.498	61.756	52.157	44.075	60.804	67.63	70.72	54.343	37.739	58.673	67.444	51.19	78.947	41.722	55.777	44.56	69.847	43.816	72.041	43.55	65.811	23.092	41.698	27.076	46.571	42.315	44.646	58.224	23.422	34.007	41.471	19.363	46.327	29.676	27.766	46.351	30.525	44.165	58.875	23.817
597.32	56.127	63.673	41.126	67.532	55.495	75.423	55.79	72.691	43.061	70.49	61.839	52.229	44.161	60.791	67.683	70.738	54.378	37.807	58.775	67.409	51.199	78.985	41.756	55.834	44.589	69.849	43.853	72.024	43.573	65.843	23.359	41.962	27.28	46.664	42.439	44.957	58.324	23.617	34.184	41.77	19.619	46.49	29.771	27.876	46.451	30.759	44.282	58.955	23.968
597.74	56.271	63.592	41.162	67.547	55.487	75.447	55.826	72.734	43.061	70.529	61.881	52.271	44.285	60.847	67.755	70.795	54.406	37.837	58.786	67.547	51.245	79.1	41.785	55.892	44.565	69.912	43.872	72.017	43.644	65.85	23.632	42.291	27.488	46.809	42.613	45.337	58.471	23.834	34.396	42.087	19.924	46.755	29.977	28.018	46.602	31.016	44.436	59.048	24.144
598.16	56.39	63.689	41.229	67.628	55.609	75.635	55.96	72.898	43.063	70.592	61.948	52.372	44.369	60.971	67.882	70.9	54.407	37.881	58.905	67.593	51.303	79.194	41.854	55.963	44.614	70.009	43.941	72.169	43.723	65.941	23.911	42.579	27.679	46.888	42.701	45.691	58.6	24.047	34.644	42.417	20.193	47.019	30.141	28.167	46.748	31.259	44.606	59.137	24.259
598.59	56.451	63.716	41.264	67.619	55.589	75.668	55.928	72.904	43.076	70.634	61.965	52.38	44.42	60.995	67.919	70.894	54.421	37.905	58.922	67.593	51.289	79.243	41.87	55.972	44.584	70.048	43.956	72.176	43.73	65.906	24.208	42.864	27.848	46.98	42.908	46.054	58.728	24.235	34.846	42.747	20.489	47.295	30.277	28.302	46.918	31.546	44.689	59.204	24.442
599.01	56.42	63.723	41.254	67.59	55.6	75.555	55.86	72.873	43.043	70.518	61.914	52.367	44.457	60.966	67.929	70.909	54.415	37.873	58.926	67.564	51.214	79.183	41.813	55.831	44.55	69.973	43.917	72.11	43.671	65.884	24.497	43.145	28.029	47.098	43.024	46.386	58.835	24.462	35.022	43.039	20.77	47.571	30.39	28.426	47.026	31.777	44.825	59.261	24.623
599.43	56.465	63.728	41.266	67.623	55.641	75.549	55.853	72.905	43.004	70.522	62.025	52.41	44.531	61.002	68.04	70.987	54.377	37.913	58.927	67.645	51.242	79.266	41.836	55.847	44.609	69.958	43.865	72.13	43.699	65.822	24.774	43.408	28.191	47.201	43.104	46.7	58.94	24.661	35.183	43.283	21.048	47.787	30.508	28.527	47.103	32.005	44.958	59.299	24.787
599.85	56.463	63.77	41.228	67.604	55.651	75.6	55.778	72.863	42.999	70.52	62.079	52.407	44.59	60.973	68.045	71.025	54.406	37.893	58.968	67.67	51.294	79.285	41.868	55.87	44.592	69.933	43.861	72.116	43.735	65.883	25.01	43.701	28.363	47.337	43.256	47.065	59.088	24.872	35.392	43.633	21.324	48.051	30.647	28.659	47.174	32.294	45.14	59.328	24.976
600.27	56.529	63.694	41.22	67.547	55.637	75.557	55.739	72.908	42.989	70.506	62.072	52.398	44.641	61.034	68.074	71.056	54.4	37.913	58.949	67.64	51.302	79.247	41.849	55.861	44.576	69.899	43.848	71.998	43.757	65.963	25.288	44.008	28.549	47.411	43.371	47.378	59.236	25.089	35.583	43.933	21.601	48.239	30.779	28.781	47.272	32.54	45.27	59.312	25.167
600.7	56.566	63.614	41.299	67.574	55.619	75.53	55.738	72.934	43.003	70.477	62.094	52.417	44.754	61.048	68.12	71.016	54.443	37.857	58.965	67.603	51.345	79.341	41.877	55.916	44.602	69.924	43.799	71.975	43.655	65.957	25.591	44.297	28.776	47.547	43.547	47.745	59.367	25.32	35.794	44.203	21.92	48.43	30.942	28.908	47.371	32.801	45.434	59.398	25.317
601.12	56.605	63.619	41.273	67.567	55.755	75.64	55.754	72.942	43.04	70.493	62.116	52.389	44.829	61.096	68.131	71.111	54.429	37.862	58.97	67.689	51.325	79.35	41.869	55.931	44.603	69.983	43.786	72.016	43.596	65.985	25.868	44.546	28.987	47.627	43.673	48.116	59.556	25.506	35.947	44.495	22.203	48.681	31.117	29.05	47.5	33.073	45.596	59.452	25.493
601.54	56.659	63.673	41.218	67.55	55.819	75.668	55.723	72.942	43.041	70.547	62.161	52.5	44.873	61.141	68.269	71.113	54.378	37.921	59.046	67.672	51.343	79.404	41.873	55.971	44.634	70.083	43.819	72.128	43.611	65.984	26.154	44.841	29.18	47.689	43.824	48.448	59.654	25.691	36.166	44.805	22.481	48.938	31.259	29.171	47.632	33.275	45.736	59.571	25.668
601.96	56.698	63.791	41.269	67.594	55.846	75.78	55.756	73.027	43.084	70.692	62.207	52.554	44.98	61.132	68.342	71.235	54.45	37.998	59.097	67.812	51.41	79.439	41.962	56.085	44.713	70.157	43.891	72.232	43.611	66.027	26.393	45.106	29.372	47.838	43.977	48.77	59.755	25.896	36.337	45.091	22.757	49.144	31.412	29.292	47.704	33.507	45.893	59.617	25.842
602.38	56.771	63.816	41.253	67.537	55.778	75.777	55.697	73.131	43.058	70.683	62.177	52.485	44.966	61.089	68.306	71.209	54.443	37.951	59.071	67.859	51.356	79.318	41.881	56.127	44.683	70.095	43.82	72.191	43.597	66	26.677	45.38	29.524	47.956	44.063	49.119	59.885	26.116	36.486	45.364	23.046	49.349	31.568	29.391	47.842	33.744	46.037	59.67	26.014
602.8	56.789	63.829	41.25	67.556	55.819	75.807	55.711	73.212	42.995	70.734	62.236	52.516	45.003	61.091	68.401	71.145	54.452	37.95	59.078	67.855	51.347	79.314	41.969	56.131	44.712	70.119	43.806	72.215	43.615	66.048	26.974	45.613	29.691	48.048	44.182	49.428	59.967	26.291	36.662	45.661	23.314	49.559	31.683	29.498	47.917	33.93	46.173	59.716	26.141
603.22	56.848	63.753	41.208	67.567	55.867	75.78	55.661	73.256	42.946	70.661	62.27	52.494	44.984	61.133	68.374	71.181	54.477	37.888	58.991	67.819	51.302	79.256	41.974	56.1	44.709	70.184	43.828	72.258	43.597	66.059	27.244	45.833	29.887	48.139	44.275	49.76	60.167	26.469	36.836	45.964	23.582	49.765	31.829	29.592	48.009	34.146	46.323	59.801	26.315
603.65	56.976	63.803	41.25	67.637	55.887	75.843	55.701	73.372	42.963	70.722	62.349	52.563	45.033	61.211	68.446	71.222	54.493	37.853	58.988	67.915	51.31	79.298	42.062	56.082	44.718	70.259	43.878	72.273	43.636	66.092	27.536	46.099	30.048	48.286	44.38	50.106	60.321	26.638	37.029	46.257	23.9	49.967	31.981	29.698	48.096	34.356	46.439	59.873	26.496
604.07	56.996	63.769	41.227	67.637	55.909	75.867	55.713	73.378	42.978	70.75	62.373	52.58	45.013	61.227	68.436	71.163	54.535	37.866	59.055	67.911	51.319	79.33	42.085	56.044	44.711	70.279	43.902	72.381	43.593	66.119	27.805	46.355	30.255	48.4	44.503	50.478	60.403	26.885	37.241	46.567	24.204	50.21	32.147	29.824	48.191	34.585	46.616	59.926	26.67
604.49	56.915	63.836	41.237	67.644	55.893	75.902	55.731	73.39	42.989	70.843	62.411	52.591	45.014	61.265	68.497	71.207	54.565	37.82	59.055	67.977	51.355	79.321	42.067	56.144	44.751	70.235	43.889	72.491	43.616	66.143	28.062	46.614	30.393	48.507	44.597	50.761	60.487	27.057	37.402	46.814	24.484	50.436	32.276	29.909	48.225	34.825	46.719	59.909	26.812
604.91	56.902	63.847	41.185	67.65	55.906	75.964	55.67	73.414	42.917	70.833	62.409	52.557	45.014	61.229	68.594	71.136	54.511	37.859	59.094	67.944	51.302	79.257	42.058	56.129	44.77	70.244	43.892	72.54	43.624	66.122	28.372	46.852	30.556	48.604	44.757	51.077	60.587	27.222	37.6	47.141	24.796	50.644	32.384	30.047	48.399	35.032	46.863	59.992	26.956
605.33	56.848	63.869	41.155	67.561	55.993	76.017	55.68	73.409	42.988	70.875	62.46	52.458	45.038	61.262	68.632	71.162	54.498	37.874	59.112	68.005	51.337	79.228	42.087	56.11	44.791	70.315	43.898	72.584	43.649	66.15	28.681	47.11	30.742	48.724	44.904	51.45	60.74	27.376	37.781	47.439	25.107	50.899	32.55	30.172	48.519	35.238	47.01	60.054	27.113
605.75	56.741	63.907	41.118	67.526	55.985	76.056	55.623	73.434	42.928	70.785	62.435	52.409	45.001	61.194	68.571	71.088	54.406	37.865	59.02	67.889	51.317	79.139	42.048	56.091	44.747	70.27	43.885	72.48	43.627	66.097	28.931	47.359	30.896	48.874	45.022	51.756	60.907	27.548	37.929	47.747	25.369	51.072	32.65	30.293	48.617	35.458	47.144	60.102	27.27
606.17	56.727	63.839	41.041	67.462	55.862	75.927	55.546	73.35	42.907	70.728	62.373	52.342	45.006	61.15	68.475	71.005	54.435	37.782	58.935	67.892	51.241	79.13	42.02	56.088	44.701	70.189	43.865	72.392	43.645	66.093	29.181	47.534	31.056	49.001	45.162	52.091	61.013	27.713	38.06	48.022	25.67	51.25	32.778	30.391	48.687	35.638	47.218	60.133	27.428
606.59	56.705	63.837	41.021	67.495	55.846	75.91	55.495	73.43	42.84	70.698	62.389	52.388	45.034	61.126	68.563	70.991	54.483	37.773	58.927	67.887	51.229	79.074	42.02	56.095	44.71	70.061	43.898	72.434	43.695	66.133	29.46	47.814	31.256	49.15	45.238	52.39	61.131	27.928	38.238	48.321	25.957	51.411	32.919	30.53	48.771	35.834	47.389	60.192	27.581
607.02	56.736	63.825	41.096	67.535	55.857	75.943	55.522	73.539	42.855	70.796	62.447	52.48	45.084	61.086	68.625	70.999	54.505	37.8	58.974	67.923	51.31	79.044	42.056	56.229	44.752	70.102	43.912	72.487	43.788	66.147	29.679	48.03	31.408	49.274	45.34	52.733	61.24	28.096	38.414	48.597	26.249	51.561	33.054	30.65	48.867	36.015	47.512	60.264	27.73
607.44	56.708	63.804	41.173	67.547	55.827	75.935	55.567	73.488	42.923	70.737	62.404	52.45	45.121	61.093	68.607	70.979	54.456	37.812	59.003	67.916	51.353	79.051	42.077	56.243	44.758	70.09	43.934	72.526	43.769	66.211	29.957	48.28	31.572	49.415	45.487	53.043	61.335	28.256	38.583	48.895	26.532	51.739	33.179	30.769	48.998	36.201	47.665	60.348	27.886
607.86	56.724	63.769	41.214	67.588	55.854	75.866	55.582	73.558	42.941	70.739	62.417	52.494	45.071	61.125	68.585	70.956	54.465	37.841	58.972	67.854	51.295	79.013	42.084	56.263	44.785	70.142	43.939	72.548	43.754	66.219	30.234	48.491	31.71	49.488	45.541	53.303	61.39	28.374	38.677	49.076	26.769	51.864	33.249	30.869	49.095	36.34	47.725	60.431	28.006
608.28	56.692	63.838	41.298	67.612	55.933	75.879	55.581	73.591	42.963	70.744	62.458	52.513	45.093	61.131	68.596	70.856	54.452	37.846	58.995	67.94	51.308	79.026	42.127	56.345	44.803	70.153	43.97	72.529	43.726	66.22	30.515	48.663	31.876	49.642	45.662	53.63	61.468	28.543	38.802	49.335	27.05	52.042	33.382	30.978	49.138	36.513	47.838	60.543	28.132
608.7	56.671	63.875	41.301	67.572	55.937	75.914	55.542	73.623	42.948	70.763	62.477	52.513	45.066	61.144	68.576	70.864	54.461	37.853	59.006	67.961	51.33	78.915	42.153	56.312	44.73	70.122	44.03	72.561	43.723	66.253	30.723	48.876	31.988	49.701	45.696	53.902	61.547	28.675	38.911	49.584	27.304	52.202	33.45	31.081	49.199	36.67	47.906	60.597	28.292
609.12	56.642	63.854	41.353	67.607	55.876	75.88	55.501	73.613	42.896	70.767	62.465	52.494	45.116	61.071	68.562	70.721	54.433	37.787	58.996	67.918	51.326	78.96	42.123	56.251	44.678	70.123	44.002	72.571	43.732	66.208	30.915	49.098	32.128	49.828	45.827	54.188	61.618	28.878	39.109	49.858	27.576	52.372	33.563	31.222	49.335	36.845	47.999	60.689	28.43
609.54	56.664	63.784	41.382	67.693	55.833	75.955	55.519	73.583	42.846	70.798	62.5	52.434	45.146	61.102	68.536	70.711	54.443	37.803	58.943	67.917	51.315	78.992	42.189	56.188	44.611	70.089	44.01	72.575	43.708	66.237	31.167	49.322	32.303	49.972	45.904	54.493	61.703	29.046	39.227	50.086	27.857	52.517	33.674	31.326	49.399	37.039	48.095	60.711	28.542
609.96	56.64	63.712	41.365	67.654	55.814	75.808	55.47	73.544	42.848	70.653	62.581	52.455	45.084	61.092	68.435	70.655	54.417	37.786	58.824	67.859	51.212	78.966	42.104	56.115	44.58	69.988	43.972	72.482	43.653	66.23	31.393	49.466	32.398	50.072	45.967	54.752	61.756	29.215	39.36	50.291	28.112	52.663	33.727	31.419	49.521	37.204	48.199	60.698	28.67
610.38	56.615	63.726	41.395	67.606	55.851	75.782	55.477	73.475	42.871	70.667	62.71	52.521	45.14	61.106	68.508	70.638	54.445	37.814	58.825	67.836	51.265	79.073	42.153	56.055	44.609	69.982	44.049	72.477	43.635	66.217	31.616	49.607	32.516	50.112	46.004	55.037	61.779	29.357	39.493	50.504	28.349	52.788	33.82	31.527	49.542	37.317	48.295	60.702	28.761
610.8	56.596	63.711	41.407	67.629	55.81	75.661	55.469	73.429	42.891	70.646	62.757	52.471	45.192	61.086	68.453	70.62	54.349	37.754	58.759	67.816	51.199	79.02	42.109	56.007	44.599	69.912	44.076	72.42	43.603	66.14	31.815	49.787	32.673	50.204	46.093	55.317	61.808	29.519	39.62	50.725	28.626	52.877	33.942	31.628	49.614	37.488	48.368	60.716	28.868
611.22	56.536	63.763	41.475	67.631	55.78	75.683	55.556	73.459	42.923	70.775	62.836	52.525	45.192	61.097	68.592	70.638	54.315	37.796	58.863	67.869	51.268	79.119	42.124	56.012	44.677	69.915	44.081	72.427	43.583	66.12	32.014	50.001	32.785	50.292	46.181	55.572	61.812	29.663	39.72	50.936	28.872	52.989	34.019	31.712	49.688	37.618	48.482	60.643	28.976
611.64	56.476	63.716	41.494	67.644	55.754	75.634	55.534	73.401	42.893	70.746	62.81	52.499	45.127	61.02	68.559	70.573	54.259	37.775	58.839	67.795	51.283	79.091	42.122	56.038	44.711	69.831	44.068	72.445	43.525	66.086	32.212	50.161	32.93	50.381	46.27	55.846	61.882	29.831	39.801	51.121	29.061	53.105	34.108	31.795	49.815	37.758	48.569	60.705	29.058
612.06	56.448	63.721	41.506	67.732	55.734	75.611	55.533	73.516	42.802	70.819	62.84	52.522	45.116	61.064	68.561	70.621	54.289	37.8	58.754	67.803	51.327	79.113	42.078	56.056	44.702	69.825	44.069	72.405	43.561	66.042	32.446	50.368	33.053	50.481	46.324	56.12	62.01	29.987	39.899	51.313	29.3	53.231	34.166	31.896	49.916	37.894	48.675	60.803	29.175
612.48	56.462	63.655	41.519	67.677	55.774	75.522	55.481	73.543	42.795	70.721	62.819	52.566	45.101	61.075	68.565	70.547	54.328	37.881	58.785	67.801	51.246	79.102	42.118	56.045	44.645	69.844	44.089	72.314	43.524	66.013	32.615	50.525	33.191	50.528	46.382	56.372	62.075	30.107	40.008	51.511	29.524	53.291	34.202	31.997	50.031	38.017	48.762	60.826	29.269
612.9	56.549	63.688	41.607	67.764	55.811	75.562	55.573	73.618	42.858	70.779	62.867	52.63	45.151	61.193	68.588	70.66	54.405	37.898	58.814	67.904	51.305	79.226	42.137	56.187	44.676	69.862	44.075	72.387	43.502	66.034	32.792	50.733	33.309	50.637	46.468	56.609	62.174	30.25	40.117	51.718	29.752	53.44	34.301	32.068	50.065	38.186	48.872	60.869	29.391
613.32	56.589	63.714	41.613	67.839	55.786	75.595	55.54	73.705	42.812	70.758	62.876	52.729	45.15	61.242	68.631	70.609	54.454	37.938	58.869	67.947	51.314	79.203	42.116	56.199	44.719	69.83	44.104	72.404	43.458	66.041	32.922	50.923	33.378	50.733	46.531	56.83	62.193	30.388	40.187	51.884	29.987	53.54	34.334	32.16	50.106	38.312	48.934	60.882	29.478
613.74	56.716	63.83	41.685	67.97	55.847	75.675	55.607	73.798	42.896	70.836	62.97	52.878	45.215	61.331	68.68	70.668	54.583	37.958	58.982	68.09	51.376	79.274	42.227	56.328	44.755	69.868	44.202	72.563	43.497	66.113	33.141	51.073	33.53	50.79	46.616	57.074	62.186	30.525	40.31	52.058	30.252	53.67	34.426	32.271	50.193	38.463	49.015	60.892	29.584
614.16	56.749	63.89	41.791	68.05	55.889	75.741	55.624	73.951	42.94	70.944	63.03	52.941	45.314	61.37	68.821	70.722	54.557	38.056	59.076	68.155	51.428	79.353	42.276	56.38	44.845	69.968	44.239	72.634	43.505	66.161	33.341	51.279	33.62	50.91	46.692	57.297	62.212	30.641	40.386	52.242	30.467	53.764	34.536	32.364	50.225	38.597	49.105	60.907	29.693
614.59	56.758	63.849	41.814	67.943	55.861	75.65	55.647	73.883	42.936	70.928	63.019	52.896	45.272	61.388	68.686	70.705	54.487	38.036	59.018	68.105	51.349	79.354	42.226	56.355	44.806	69.958	44.217	72.536	43.37	66.133	33.485	51.401	33.714	50.973	46.722	57.514	62.199	30.741	40.475	52.33	30.666	53.867	34.6	32.433	50.236	38.71	49.17	60.89	29.79
615.01	56.811	63.847	41.821	67.956	55.886	75.671	55.643	73.897	42.922	70.885	63.091	52.843	45.25	61.464	68.638	70.693	54.514	38.031	58.972	68.131	51.385	79.442	42.275	56.267	44.833	69.992	44.272	72.528	43.292	66.107	33.666	51.586	33.805	51	46.763	57.662	62.207	30.859	40.594	52.495	30.912	53.995	34.694	32.515	50.278	38.853	49.214	60.899	29.868
615.43	56.799	63.814	41.789	67.956	55.896	75.632	55.58	73.912	42.849	70.884	63.187	52.832	45.29	61.415	68.676	70.66	54.637	37.975	58.997	68.146	51.379	79.424	42.253	56.227	44.809	69.999	44.322	72.517	43.329	66.094	33.823	51.753	33.926	51.056	46.789	57.919	62.309	30.993	40.689	52.65	31.14	54.115	34.779	32.608	50.305	39.011	49.287	60.902	29.98
615.85	56.754	63.88	41.747	67.908	55.866	75.618	55.594	73.835	42.811	70.795	63.165	52.807	45.317	61.402	68.701	70.616	54.603	37.978	59.005	68.197	51.399	79.389	42.261	56.246	44.836	69.905	44.291	72.452	43.309	66.002	33.978	51.939	34.02	51.14	46.938	58.232	62.345	31.159	40.828	52.908	31.379	54.283	34.859	32.706	50.373	39.182	49.417	60.951	30.073
616.26	56.798	63.898	41.681	67.956	55.929	75.641	55.691	73.834	42.816	70.867	63.2	52.837	45.36	61.408	68.75	70.698	54.687	37.957	59.007	68.231	51.412	79.409	42.26	56.272	44.879	69.919	44.335	72.559	43.356	65.972	34.134	52.122	34.102	51.222	46.999	58.486	62.384	31.263	40.972	53.07	31.586	54.372	34.891	32.756	50.453	39.315	49.515	60.965	30.19
616.68	56.725	63.939	41.629	67.968	55.956	75.609	55.65	73.716	42.808	70.897	63.253	52.897	45.322	61.322	68.751	70.715	54.664	37.962	58.994	68.261	51.373	79.516	42.242	56.229	44.944	69.913	44.286	72.534	43.368	65.934	34.324	52.267	34.205	51.283	47.126	58.714	62.455	31.364	41.088	53.223	31.774	54.5	34.983	32.797	50.496	39.428	49.603	60.957	30.252
617.1	56.788	63.962	41.607	67.951	56.027	75.643	55.642	73.719	42.833	70.905	63.31	52.936	45.289	61.388	68.757	70.806	54.674	38.05	59.021	68.286	51.439	79.452	42.25	56.237	44.982	69.844	44.35	72.463	43.468	65.949	34.496	52.403	34.291	51.336	47.158	58.907	62.443	31.431	41.119	53.377	31.972	54.564	35.026	32.818	50.526	39.552	49.654	60.903	30.333
617.52	56.752	64	41.625	67.878	56.018	75.564	55.578	73.75	42.84	70.806	63.286	52.944	45.312	61.398	68.74	70.835	54.616	37.999	58.98	68.336	51.406	79.368	42.247	56.277	44.992	69.848	44.299	72.363	43.495	65.911	34.651	52.542	34.357	51.379	47.245	59.113	62.498	31.543	41.214	53.529	32.168	54.691	35.127	32.869	50.607	39.668	49.743	60.903	30.432
617.94	56.802	64.115	41.681	67.905	56.048	75.726	55.635	73.826	42.849	70.877	63.358	52.888	45.389	61.464	68.865	70.85	54.633	37.982	59.128	68.329	51.571	79.389	42.36	56.377	45.042	69.938	44.335	72.482	43.562	65.956	34.828	52.712	34.455	51.394	47.316	59.324	62.522	31.621	41.273	53.635	32.395	54.784	35.206	32.892	50.627	39.78	49.811	60.998	30.519
618.36	56.77	64.082	41.671	67.895	56.025	75.682	55.641	73.788	42.842	70.91	63.299	52.838	45.311	61.482	68.775	70.883	54.587	37.979	59.133	68.334	51.495	79.358	42.263	56.454	45.02	70.002	44.274	72.495	43.559	65.952	34.97	52.887	34.574	51.507	47.432	59.547	62.593	31.702	41.382	53.823	32.586	54.899	35.231	32.984	50.703	39.916	49.902	61.032	30.624
618.78	56.828	64.071	41.665	67.872	56.025	75.76	55.548	73.83	42.854	70.901	63.242	52.807	45.261	61.413	68.761	70.86	54.63	38.019	59.119	68.373	51.548	79.402	42.241	56.494	44.977	70.002	44.237	72.405	43.567	65.919	35.131	53.044	34.647	51.577	47.503	59.78	62.656	31.767	41.501	53.932	32.749	55.036	35.275	33.023	50.695	40.032	49.987	61.077	30.75
619.2	56.812	64.107	41.632	67.928	56.093	75.759	55.515	73.806	42.808	70.878	63.244	52.793	45.341	61.439	68.657	70.856	54.704	38.007	59.091	68.396	51.55	79.402	42.26	56.527	44.922	69.921	44.238	72.383	43.597	65.958	35.292	53.164	34.745	51.627	47.57	59.962	62.672	31.857	41.56	54.067	32.913	55.128	35.366	33.064	50.688	40.159	49.998	61.144	30.823
619.62	56.8	64.083	41.646	67.894	56.176	75.862	55.571	73.895	42.81	70.96	63.346	52.819	45.424	61.575	68.73	70.901	54.805	38.09	59.156	68.522	51.624	79.497	42.337	56.613	44.923	69.946	44.256	72.415	43.604	66.06	35.448	53.301	34.855	51.706	47.681	60.127	62.711	31.986	41.724	54.238	33.09	55.267	35.41	33.145	50.694	40.31	50.08	61.131	30.927
620.04	56.787	64.122	41.679	67.836	56.181	75.815	55.557	73.838	42.886	70.856	63.339	52.794	45.484	61.574	68.711	70.81	54.802	38.03	59.162	68.545	51.578	79.424	42.338	56.642	44.935	69.965	44.243	72.403	43.6	66.115	35.574	53.422	34.947	51.756	47.771	60.338	62.707	32.075	41.838	54.369	33.276	55.322	35.474	33.216	50.705	40.432	50.159	61.08	31.021
620.46	56.797	64.149	41.679	67.877	56.103	75.85	55.556	73.848	42.86	70.865	63.427	52.768	45.519	61.544	68.71	70.82	54.828	37.976	59.128	68.483	51.605	79.417	42.306	56.6	44.996	69.909	44.242	72.388	43.593	66.072	35.757	53.538	35.022	51.801	47.854	60.518	62.734	32.179	41.943	54.5	33.454	55.443	35.523	33.309	50.744	40.547	50.171	61.099	31.095
620.88	56.745	64.085	41.604	67.789	56.086	75.779	55.5	73.745	42.857	70.781	63.465	52.733	45.497	61.465	68.633	70.776	54.834	37.928	59.074	68.419	51.581	79.325	42.308	56.539	45.022	69.791	44.219	72.257	43.57	66.098	35.934	53.622	35.11	51.868	47.901	60.77	62.827	32.302	42.049	54.703	33.636	55.526	35.58	33.415	50.767	40.649	50.257	61.119	31.174
621.3	56.792	64.077	41.64	67.846	56.132	75.811	55.495	73.77	42.855	70.845	63.496	52.719	45.555	61.462	68.7	70.874	54.792	37.884	59.048	68.411	51.649	79.412	42.366	56.525	45.014	69.801	44.225	72.292	43.609	66.161	36.101	53.747	35.225	51.931	47.94	60.969	62.87	32.424	42.165	54.883	33.804	55.661	35.724	33.492	50.825	40.76	50.332	61.155	31.279
621.72	56.732	64.108	41.688	67.761	56.136	75.784	55.516	73.746	42.811	70.866	63.495	52.638	45.544	61.437	68.698	70.883	54.723	37.938	59.002	68.399	51.648	79.405	42.323	56.441	45.012	69.872	44.2	72.217	43.58	66.171	36.195	53.851	35.273	51.971	47.984	61.144	62.906	32.539	42.235	54.958	33.961	55.723	35.769	33.496	50.829	40.854	50.386	61.168	31.374
622.14	56.666	64.09	41.672	67.767	56.163	75.742	55.539	73.72	42.748	70.807	63.514	52.656	45.557	61.434	68.635	70.966	54.705	37.935	58.984	68.409	51.69	79.381	42.326	56.417	44.991	69.843	44.232	72.182	43.513	66.126	36.356	53.952	35.387	52.006	48.019	61.324	62.952	32.675	42.361	55.053	34.128	55.816	35.795	33.588	50.892	40.975	50.468	61.204	31.481
622.56	56.668	64.123	41.713	67.778	56.182	75.843	55.645	73.823	42.787	70.82	63.572	52.661	45.633	61.417	68.645	70.962	54.69	37.962	59.007	68.479	51.833	79.508	42.369	56.446	44.983	69.938	44.19	72.213	43.543	66.134	36.485	54.054	35.451	52.043	48.07	61.518	63.041	32.766	42.408	55.214	34.279	55.903	35.877	33.606	50.963	41.082	50.534	61.206	31.538
622.98	56.651	64.11	41.688	67.73	56.108	75.837	55.628	73.839	42.768	70.878	63.512	52.67	45.655	61.383	68.716	71.003	54.613	37.92	59.026	68.454	51.793	79.506	42.332	56.444	44.958	69.851	44.179	72.131	43.575	66.098	36.625	54.138	35.541	52.134	48.159	61.696	63.081	32.869	42.449	55.333	34.404	55.966	35.929	33.651	51.031	41.167	50.66	61.228	31.615
623.4	56.692	64.154	41.656	67.752	56.084	75.834	55.609	73.841	42.815	70.914	63.469	52.7	45.652	61.401	68.72	71.033	54.536	37.89	58.955	68.452	51.816	79.488	42.352	56.517	44.939	69.83	44.143	72.125	43.577	66.107	36.768	54.23	35.626	52.199	48.227	61.882	63.081	32.951	42.505	55.452	34.563	56.008	36.002	33.718	51.046	41.266	50.711	61.175	31.688
623.81	56.815	64.167	41.749	67.817	56.156	75.881	55.615	73.94	42.888	71.067	63.578	52.746	45.677	61.43	68.809	71.157	54.578	37.896	58.987	68.538	51.894	79.584	42.387	56.55	44.94	69.888	44.191	72.241	43.612	66.253	36.869	54.326	35.711	52.232	48.244	61.996	63.118	33.025	42.58	55.525	34.728	56.026	36.083	33.771	51.077	41.286	50.761	61.142	31.767
624.23	56.843	64.167	41.815	67.815	56.148	75.966	55.552	74.003	42.835	70.98	63.637	52.693	45.678	61.438	68.825	71.164	54.559	37.916	59.082	68.556	51.986	79.617	42.437	56.506	44.925	69.888	44.157	72.318	43.574	66.276	36.998	54.459	35.769	52.273	48.323	62.151	63.145	33.157	42.668	55.682	34.907	56.15	36.208	33.863	51.137	41.385	50.87	61.142	31.821
624.65	56.873	64.104	41.84	67.719	56.07	75.973	55.588	74.028	42.813	70.858	63.594	52.625	45.792	61.405	68.789	71.103	54.527	37.952	59.039	68.521	52.031	79.573	42.412	56.551	44.924	69.842	44.16	72.275	43.575	66.261	37.098	54.559	35.855	52.353	48.359	62.251	63.149	33.277	42.772	55.816	35.071	56.218	36.266	33.945	51.172	41.536	50.937	61.138	31.902
625.07	56.801	64.059	41.803	67.669	55.96	75.949	55.558	74.008	42.715	70.842	63.575	52.603	45.764	61.328	68.817	70.989	54.497	37.872	58.974	68.525	51.989	79.474	42.357	56.513	44.863	69.818	44.092	72.266	43.468	66.217	37.259	54.681	35.937	52.423	48.471	62.486	63.235	33.417	42.871	55.949	35.229	56.339	36.328	33.993	51.179	41.645	51.054	61.206	31.975
625.49	56.759	64.017	41.867	67.689	55.98	76.01	55.534	74.02	42.745	70.84	63.617	52.63	45.752	61.277	68.835	70.967	54.526	37.858	58.991	68.539	52.018	79.513	42.368	56.504	44.916	69.764	44.136	72.337	43.472	66.276	37.357	54.733	35.997	52.508	48.538	62.65	63.268	33.518	42.942	56.083	35.413	56.381	36.386	34.092	51.25	41.801	51.134	61.18	32.079
625.91	56.701	63.861	41.843	67.6	55.94	75.939	55.432	73.981	42.609	70.852	63.518	52.651	45.756	61.213	68.804	70.964	54.507	37.827	58.931	68.536	51.934	79.498	42.298	56.388	44.847	69.705	44.123	72.229	43.416	66.229	37.483	54.876	36.102	52.647	48.617	62.826	63.366	33.638	43.079	56.228	35.564	56.485	36.481	34.209	51.35	41.943	51.224	61.193	32.139
626.33	56.761	63.907	41.886	67.726	55.985	76.028	55.509	74.091	42.604	70.87	63.617	52.694	45.845	61.297	68.934	70.971	54.544	37.869	58.999	68.603	52.004	79.568	42.407	56.447	44.887	69.683	44.175	72.273	43.435	66.27	37.635	54.986	36.181	52.7	48.663	62.984	63.421	33.725	43.128	56.353	35.727	56.574	36.583	34.241	51.347	42.1	51.27	61.18	32.236
626.75	56.78	63.977	41.941	67.802	55.975	76.129	55.594	74.173	42.603	70.908	63.691	52.773	45.922	61.372	69.028	71.054	54.652	37.903	59.137	68.69	52.034	79.595	42.478	56.467	44.958	69.789	44.225	72.455	43.428	66.406	37.764	55.068	36.261	52.734	48.723	63.137	63.474	33.811	43.176	56.485	35.89	56.603	36.627	34.322	51.424	42.196	51.303	61.187	32.297
627.16	56.851	64.009	42.007	67.828	55.967	76.197	55.614	74.326	42.656	70.944	63.759	52.793	46.002	61.4	69.103	71.099	54.65	37.927	59.158	68.736	52.108	79.637	42.477	56.57	45.006	69.844	44.237	72.569	43.541	66.412	37.898	55.22	36.347	52.827	48.771	63.379	63.56	33.968	43.307	56.605	36.066	56.721	36.681	34.448	51.461	42.304	51.41	61.221	32.363
627.58	56.808	63.971	42.038	67.746	55.944	76.115	55.543	74.291	42.657	70.873	63.654	52.715	46.012	61.335	69.086	71	54.558	37.89	59.127	68.705	52.1	79.578	42.37	56.476	45.008	69.875	44.175	72.507	43.555	66.377	37.993	55.335	36.386	52.819	48.805	63.506	63.601	34.01	43.32	56.688	36.206	56.76	36.75	34.474	51.505	42.353	51.517	61.228	32.401
628	56.886	63.993	42.039	67.701	56	76.182	55.59	74.278	42.642	70.906	63.716	52.671	46.03	61.317	69.161	71.068	54.526	37.876	59.164	68.703	52.192	79.625	42.395	56.526	45.089	69.844	44.205	72.502	43.537	66.395	38.106	55.471	36.419	52.925	48.888	63.637	63.638	34.126	43.406	56.816	36.372	56.868	36.884	34.542	51.587	42.488	51.572	61.292	32.478
628.42	56.884	64.009	42.089	67.732	56.096	76.18	55.616	74.278	42.688	70.892	63.698	52.7	46.104	61.397	69.153	71.077	54.461	37.856	59.199	68.757	52.264	79.677	42.401	56.542	45.06	69.894	44.209	72.613	43.573	66.399	38.254	55.639	36.518	53.034	49.005	63.851	63.748	34.259	43.52	56.992	36.54	57.001	37.023	34.593	51.646	42.601	51.774	61.369	32.607
628.84	56.878	64.029	42.116	67.67	56.057	76.158	55.628	74.359	42.672	70.926	63.69	52.69	46.151	61.351	69.108	71.072	54.416	37.896	59.189	68.796	52.263	79.683	42.323	56.497	45.027	69.999	44.27	72.616	43.588	66.373	38.355	55.795	36.605	53.112	49.097	64.002	63.774	34.388	43.61	57.082	36.709	57.122	37.139	34.677	51.761	42.773	51.857	61.407	32.722
629.26	56.881	64.052	42.17	67.718	56.016	76.134	55.681	74.398	42.696	70.922	63.731	52.697	46.17	61.302	69.108	71.012	54.415	37.896	59.177	68.873	52.271	79.659	42.314	56.566	45.075	69.951	44.308	72.614	43.602	66.352	38.437	55.822	36.656	53.163	49.197	64.173	63.818	34.471	43.695	57.161	36.877	57.178	37.226	34.736	51.804	42.909	51.918	61.438	32.789
629.68	56.917	63.989	42.187	67.683	56.015	76.126	55.709	74.379	42.669	70.908	63.719	52.682	46.212	61.23	69.104	71.043	54.402	37.874	59.251	68.82	52.252	79.631	42.337	56.589	45.07	69.853	44.253	72.615	43.615	66.359	38.506	55.872	36.695	53.244	49.238	64.337	63.825	34.558	43.761	57.251	36.973	57.238	37.294	34.842	51.818	43.017	51.989	61.451	32.877
630.09	56.995	64.006	42.198	67.762	55.965	76.169	55.735	74.418	42.693	71.026	63.785	52.688	46.305	61.281	69.145	71.008	54.48	37.893	59.263	68.872	52.281	79.712	42.349	56.646	45.121	69.929	44.224	72.702	43.675	66.413	38.545	55.961	36.725	53.28	49.298	64.478	63.847	34.637	43.794	57.365	37.111	57.265	37.364	34.865	51.834	43.086	52.032	61.412	32.879
630.51	57.056	63.964	42.2	67.837	55.953	76.131	55.647	74.374	42.695	71.038	63.724	52.664	46.33	61.294	69.262	71.006	54.491	37.837	59.278	68.911	52.234	79.591	42.36	56.622	45.147	69.914	44.27	72.734	43.664	66.444	38.667	56.054	36.81	53.4	49.404	64.675	63.905	34.738	43.923	57.492	37.281	57.35	37.487	34.964	51.873	43.228	52.113	61.493	32.962
630.93	57.116	64.076	42.231	67.912	55.99	76.196	55.698	74.395	42.712	71.1	63.79	52.73	46.371	61.326	69.28	70.966	54.589	37.926	59.262	68.95	52.244	79.575	42.418	56.743	45.177	70.059	44.283	72.831	43.669	66.539	38.815	56.155	36.897	53.515	49.485	64.926	63.98	34.851	44.08	57.632	37.48	57.504	37.619	35.092	51.957	43.381	52.205	61.568	33.074
631.35	57.196	64.082	42.264	67.926	56.039	76.263	55.715	74.514	42.713	71.151	63.8	52.762	46.385	61.41	69.308	70.952	54.675	37.996	59.34	69.054	52.273	79.621	42.396	56.794	45.218	70.113	44.327	72.868	43.61	66.56	38.909	56.268	36.936	53.584	49.587	65.052	64.038	34.974	44.239	57.768	37.661	57.685	37.721	35.16	52.009	43.524	52.322	61.625	33.176
631.77	57.144	64.089	42.236	67.879	56.046	76.301	55.709	74.46	42.666	71.122	63.814	52.797	46.471	61.346	69.273	70.899	54.668	37.983	59.348	69.043	52.287	79.65	42.403	56.717	45.25	70.13	44.349	72.788	43.619	66.509	39.053	56.345	37.017	53.723	49.706	65.237	64.114	35.153	44.348	57.911	37.813	57.8	37.844	35.235	52.052	43.709	52.417	61.697	33.273
632.18	57.127	64.042	42.207	67.935	56	76.247	55.736	74.508	42.67	71.171	63.768	52.878	46.542	61.359	69.276	70.882	54.668	37.942	59.292	69.036	52.283	79.577	42.384	56.77	45.23	70.144	44.381	72.757	43.627	66.481	39.19	56.392	37.165	53.798	49.822	65.396	64.2	35.196	44.47	58.017	37.949	57.859	37.943	35.302	52.105	43.857	52.457	61.732	33.357
632.6	57.192	64.129	42.252	67.984	56.095	76.215	55.739	74.617	42.655	71.272	63.8	52.957	46.544	61.399	69.362	71	54.636	37.943	59.355	69.101	52.293	79.651	42.449	56.802	45.198	70.199	44.451	72.832	43.646	66.495	39.351	56.501	37.251	53.916	49.941	65.61	64.228	35.308	44.535	58.119	38.115	57.966	38.091	35.424	52.192	43.978	52.551	61.8	33.427
633.02	57.285	64.201	42.391	68.047	56.167	76.26	55.815	74.633	42.746	71.274	63.851	52.995	46.688	61.481	69.358	71.09	54.723	38.012	59.379	69.157	52.372	79.785	42.529	56.934	45.246	70.343	44.589	72.893	43.707	66.597	39.427	56.58	37.314	53.995	50.008	65.754	64.257	35.384	44.639	58.22	38.291	58.037	38.246	35.566	52.234	44.084	52.651	61.794	33.505
633.44	57.391	64.27	42.401	68.118	56.158	76.258	55.81	74.634	42.73	71.34	63.942	52.966	46.797	61.507	69.392	71.113	54.727	38.069	59.384	69.176	52.411	79.811	42.535	56.964	45.269	70.366	44.614	72.899	43.7	66.561	39.525	56.713	37.395	54.1	50.06	65.905	64.281	35.479	44.753	58.34	38.418	58.131	38.353	35.659	52.269	44.139	52.738	61.864	33.596
633.86	57.461	64.399	42.469	68.23	56.204	76.301	55.892	74.722	42.826	71.433	63.978	53.044	46.883	61.58	69.431	71.163	54.748	38.152	59.492	69.299	52.459	79.894	42.557	57.095	45.389	70.44	44.698	73.057	43.716	66.644	39.681	56.86	37.499	54.193	50.187	66.149	64.325	35.617	44.896	58.55	38.64	58.266	38.517	35.775	52.352	44.276	52.878	61.922	33.759
634.27	57.472	64.384	42.489	68.185	56.148	76.253	55.851	74.728	42.797	71.429	63.954	53.053	46.913	61.629	69.415	71.185	54.786	38.141	59.501	69.285	52.48	79.963	42.507	57.133	45.463	70.404	44.722	73.034	43.675	66.699	39.845	57.044	37.603	54.331	50.325	66.345	64.371	35.8	45.054	58.693	38.822	58.428	38.67	35.906	52.467	44.446	53.036	62.002	33.869
634.69	57.429	64.352	42.539	68.158	56.185	76.227	55.894	74.744	42.782	71.453	63.952	53.115	46.965	61.682	69.385	71.125	54.74	38.136	59.512	69.271	52.473	79.985	42.521	57.112	45.486	70.355	44.787	73.019	43.708	66.614	39.945	57.222	37.669	54.439	50.423	66.543	64.422	35.952	45.161	58.818	39.014	58.59	38.836	36.025	52.547	44.644	53.233	62.058	33.991
635.11	57.458	64.329	42.565	68.122	56.169	76.2	55.871	74.671	42.717	71.455	64.03	53.125	47.012	61.664	69.407	71.077	54.72	38.196	59.503	69.251	52.406	79.965	42.566	57.079	45.508	70.375	44.787	72.919	43.649	66.67	40.1	57.278	37.742	54.49	50.53	66.678	64.445	36.079	45.272	58.943	39.193	58.684	38.978	36.133	52.626	44.835	53.348	62.121	34.109
635.53	57.564	64.384	42.572	68.326	56.182	76.26	55.936	74.684	42.726	71.534	64.138	53.248	47.146	61.669	69.448	71.182	54.78	38.209	59.566	69.307	52.419	80.09	42.651	57.134	45.552	70.393	44.899	72.991	43.654	66.729	40.24	57.386	37.849	54.579	50.635	66.88	64.444	36.281	45.369	59.102	39.403	58.802	39.115	36.27	52.653	45.02	53.432	62.139	34.248
635.94	57.572	64.354	42.564	68.413	56.161	76.295	55.856	74.767	42.691	71.526	64.154	53.327	47.224	61.639	69.46	71.238	54.77	38.283	59.51	69.349	52.369	80.162	42.645	57.163	45.464	70.419	44.9	73.027	43.711	66.664	40.429	57.469	37.975	54.641	50.742	67.092	64.52	36.417	45.47	59.24	39.578	58.928	39.218	36.424	52.712	45.185	53.554	62.161	34.346
636.36	57.555	64.304	42.534	68.326	56.063	76.318	55.866	74.822	42.645	71.471	64.149	53.312	47.23	61.591	69.423	71.222	54.82	38.269	59.502	69.305	52.247	80.141	42.612	57.159	45.441	70.328	44.926	72.909	43.682	66.627	40.536	57.526	38.045	54.711	50.831	67.289	64.513	36.554	45.543	59.3	39.751	59.013	39.332	36.482	52.781	45.354	53.619	62.147	34.424
636.78	57.628	64.285	42.595	68.453	56.022	76.361	55.905	74.879	42.608	71.481	64.213	53.336	47.291	61.746	69.558	71.209	54.886	38.273	59.559	69.335	52.295	80.217	42.699	57.229	45.473	70.327	44.927	72.956	43.69	66.612	40.678	57.612	38.129	54.811	50.92	67.529	64.54	36.684	45.661	59.388	39.966	59.146	39.478	36.602	52.803	45.492	53.714	62.16	34.519
637.2	57.605	64.294	42.537	68.428	56.053	76.403	55.852	74.855	42.568	71.498	64.187	53.361	47.335	61.806	69.5	71.256	54.952	38.31	59.548	69.334	52.259	80.24	42.699	57.168	45.435	70.358	44.936	72.921	43.674	66.609	40.837	57.785	38.221	54.934	51.008	67.713	64.599	36.855	45.787	59.546	40.157	59.297	39.582	36.73	52.855	45.676	53.886	62.17	34.636
637.61	57.537	64.265	42.519	68.395	55.974	76.377	55.705	74.878	42.515	71.447	64.186	53.3	47.335	61.823	69.539	71.209	54.937	38.265	59.511	69.298	52.314	80.256	42.662	57.058	45.413	70.371	44.951	72.851	43.639	66.522	41.062	57.985	38.344	55.034	51.199	67.933	64.685	37.05	45.966	59.766	40.421	59.478	39.793	36.848	52.956	45.844	54.031	62.2	34.718
638.03	57.506	64.289	42.556	68.313	55.926	76.363	55.698	74.875	42.446	71.344	64.217	53.279	47.271	61.691	69.508	71.197	54.887	38.241	59.483	69.227	52.303	80.124	42.616	57.06	45.354	70.267	44.871	72.734	43.606	66.528	41.245	58.101	38.445	55.14	51.335	68.125	64.76	37.191	46.101	59.905	40.625	59.633	39.941	36.978	53.025	46.057	54.211	62.233	34.89
638.45	57.451	64.332	42.538	68.369	55.962	76.386	55.724	74.926	42.425	71.3	64.265	53.288	47.317	61.722	69.501	71.221	54.933	38.331	59.45	69.223	52.357	80.154	42.664	57.122	45.348	70.229	44.873	72.71	43.705	66.448	41.42	58.282	38.572	55.235	51.491	68.364	64.815	37.384	46.27	60.079	40.857	59.819	40.093	37.134	53.123	46.256	54.374	62.295	35.049
638.86	57.413	64.311	42.574	68.328	55.995	76.325	55.669	74.909	42.399	71.264	64.25	53.221	47.339	61.658	69.535	71.234	54.934	38.26	59.503	69.225	52.418	80.195	42.681	57.104	45.387	70.162	44.819	72.684	43.733	66.458	41.576	58.436	38.653	55.288	51.583	68.514	64.864	37.522	46.35	60.223	41.062	59.879	40.229	37.236	53.099	46.436	54.466	62.272	35.132
639.28	57.353	64.295	42.585	68.304	55.944	76.321	55.666	74.788	42.323	71.162	64.21	53.165	47.382	61.665	69.474	71.215	54.881	38.229	59.439	69.129	52.395	80.104	42.683	57.016	45.326	70.112	44.76	72.577	43.716	66.435	41.734	58.545	38.785	55.353	51.663	68.722	64.887	37.656	46.409	60.359	41.273	59.95	40.377	37.339	53.173	46.601	54.566	62.322	35.202
639.7	57.35	64.228	42.595	68.316	55.939	76.317	55.634	74.809	42.307	71.177	64.196	53.08	47.387	61.759	69.512	71.216	54.882	38.193	59.39	69.137	52.355	80.012	42.67	57.053	45.31	70.062	44.754	72.624	43.683	66.395	41.905	58.7	38.889	55.425	51.747	68.951	64.941	37.777	46.577	60.515	41.523	60.118	40.543	37.479	53.27	46.817	54.698	62.381	35.347
640.12	57.36	64.182	42.64	68.351	55.947	76.403	55.628	74.731	42.317	71.216	64.219	53.056	47.464	61.806	69.514	71.24	54.898	38.271	59.392	69.15	52.283	80.071	42.64	57.054	45.353	70.022	44.738	72.594	43.716	66.399	42.066	58.899	38.981	55.534	51.859	69.183	64.997	38.032	46.695	60.655	41.769	60.298	40.702	37.665	53.387	47.023	54.882	62.456	35.514
640.53	57.297	64.08	42.621	68.391	55.87	76.364	55.578	74.685	42.294	71.183	64.244	52.964	47.498	61.839	69.527	71.16	54.91	38.265	59.326	69.063	52.291	79.956	42.592	57.038	45.382	69.932	44.673	72.508	43.739	66.363	42.227	59.054	39.08	55.594	51.983	69.438	65.082	38.221	46.929	60.852	41.974	60.395	40.861	37.773	53.448	47.251	55.038	62.512	35.659
640.95	57.342	64.142	42.621	68.454	55.863	76.436	55.61	74.751	42.256	71.261	64.302	52.998	47.517	61.812	69.609	71.134	54.934	38.272	59.38	69.063	52.281	79.992	42.598	57.039	45.421	69.885	44.62	72.489	43.732	66.38	42.435	59.228	39.179	55.683	52.105	69.636	65.089	38.411	47.062	60.991	42.201	60.523	41.001	37.886	53.537	47.486	55.171	62.57	35.785
641.37	57.338	64.16	42.65	68.474	55.921	76.503	55.709	74.845	42.232	71.283	64.3	53.079	47.545	61.838	69.722	71.149	55.069	38.283	59.456	69.105	52.325	80.098	42.633	57.07	45.412	69.898	44.667	72.505	43.78	66.43	42.657	59.423	39.312	55.765	52.247	69.91	65.164	38.632	47.191	61.179	42.464	60.692	41.187	38.054	53.594	47.722	55.287	62.612	35.901
641.78	57.317	64.188	42.668	68.546	55.943	76.523	55.69	74.868	42.216	71.245	64.372	53.044	47.556	61.827	69.708	71.225	55.03	38.263	59.401	69.088	52.351	80.048	42.674	57.078	45.393	69.875	44.653	72.457	43.841	66.416	42.79	59.513	39.37	55.87	52.368	70.109	65.169	38.786	47.293	61.274	42.644	60.775	41.344	38.195	53.604	47.897	55.378	62.584	35.994
642.2	57.276	64.139	42.633	68.528	55.978	76.48	55.658	74.81	42.231	71.129	64.399	53.004	47.587	61.708	69.651	71.118	54.991	38.224	59.262	69.038	52.362	79.896	42.686	57.006	45.243	69.874	44.639	72.45	43.842	66.318	42.9	59.586	39.454	55.907	52.468	70.351	65.202	38.961	47.435	61.385	42.888	60.876	41.496	38.316	53.664	48.049	55.5	62.622	36.105
642.62	57.254	64.148	42.566	68.548	55.944	76.465	55.559	74.743	42.154	71.058	64.419	52.953	47.578	61.628	69.638	71.164	54.986	38.192	59.147	68.99	52.372	79.86	42.705	57.042	45.153	69.839	44.526	72.299	43.787	66.296	43.128	59.73	39.577	56.042	52.598	70.662	65.281	39.183	47.67	61.595	43.15	61.049	41.718	38.482	53.756	48.259	55.647	62.664	36.256
643.03	57.143	64.081	42.458	68.507	55.814	76.372	55.469	74.65	42.1	70.934	64.302	52.863	47.475	61.584	69.544	71.119	54.896	38.111	59.085	68.927	52.353	79.829	42.682	56.989	45.073	69.823	44.464	72.216	43.73	66.146	43.243	59.941	39.722	56.164	52.755	70.954	65.358	39.338	47.824	61.749	43.39	61.163	41.94	38.632	53.872	48.449	55.803	62.691	36.417
643.45	57.155	64.056	42.431	68.387	55.778	76.391	55.461	74.655	42.103	70.876	64.325	52.786	47.356	61.571	69.564	71.05	54.869	38.085	59.056	68.841	52.329	79.735	42.674	57.023	45.035	69.778	44.438	72.14	43.727	66.056	43.441	60.112	39.833	56.265	52.899	71.198	65.466	39.478	48.044	61.876	43.668	61.293	42.142	38.809	53.977	48.661	55.948	62.754	36.553
643.87	57.165	63.996	42.467	68.369	55.741	76.32	55.504	74.589	42.123	70.876	64.303	52.749	47.328	61.569	69.57	70.937	54.879	38.066	59.082	68.802	52.397	79.678	42.683	56.946	45.112	69.768	44.405	72.019	43.683	66.04	43.612	60.351	39.954	56.398	53.058	71.367	65.483	39.686	48.23	62.034	43.927	61.463	42.337	38.934	54.069	48.905	56.104	62.828	36.692
644.28	57.223	63.995	42.427	68.397	55.768	76.293	55.47	74.6	42.111	70.977	64.337	52.77	47.3	61.558	69.611	70.924	54.886	38.094	59.091	68.916	52.497	79.671	42.732	56.891	45.111	69.893	44.351	72.058	43.665	66.114	43.757	60.518	40.06	56.535	53.16	71.543	65.505	39.862	48.412	62.253	44.21	61.586	42.512	39.138	54.151	49.115	56.236	62.856	36.873
644.7	57.205	63.989	42.343	68.308	55.795	76.242	55.425	74.551	42.078	70.988	64.324	52.767	47.267	61.484	69.589	70.881	54.834	38.022	59.026	68.905	52.505	79.601	42.747	56.885	45.075	69.866	44.334	72.037	43.634	66.141	43.948	60.656	40.128	56.619	53.273	71.67	65.537	40.042	48.538	62.388	44.435	61.667	42.679	39.252	54.217	49.301	56.375	62.838	36.991
645.12	57.198	63.918	42.375	68.225	55.761	76.174	55.356	74.519	42.037	70.896	64.307	52.695	47.18	61.414	69.603	70.724	54.796	37.972	58.921	68.822	52.509	79.519	42.759	56.913	45.022	69.849	44.285	71.947	43.576	65.996	44.119	60.817	40.271	56.691	53.41	71.884	65.551	40.238	48.661	62.505	44.693	61.796	42.894	39.367	54.333	49.53	56.507	62.878	37.163
645.53	57.265	63.851	42.359	68.293	55.761	76.187	55.373	74.572	42.012	70.953	64.397	52.736	47.161	61.476	69.602	70.671	54.833	37.981	58.83	68.912	52.445	79.52	42.783	56.995	45.053	69.755	44.27	71.991	43.559	66.02	44.311	60.965	40.401	56.784	53.519	72.063	65.601	40.369	48.797	62.635	44.997	61.937	43.063	39.502	54.394	49.794	56.623	62.933	37.319
645.95	57.228	63.753	42.354	68.227	55.787	76.199	55.242	74.453	41.976	70.94	64.346	52.714	47.095	61.479	69.552	70.516	54.812	37.877	58.794	68.86	52.386	79.493	42.752	56.924	45.032	69.707	44.287	71.979	43.478	65.891	44.505	61.178	40.528	56.92	53.692	72.287	65.678	40.583	48.975	62.831	45.308	62.119	43.31	39.66	54.542	50.056	56.772	63.003	37.468
646.36	57.298	63.705	42.43	68.174	55.798	76.2	55.213	74.46	41.953	71.017	64.345	52.787	47.081	61.459	69.5	70.516	54.745	37.829	58.815	68.859	52.397	79.462	42.695	56.938	45.026	69.748	44.272	71.983	43.418	65.961	44.675	61.303	40.628	57.03	53.81	72.469	65.718	40.752	49.084	63.006	45.609	62.211	43.454	39.791	54.625	50.27	56.889	63.023	37.574
646.78	57.283	63.55	42.422	68.184	55.788	76.331	55.217	74.489	41.912	71.038	64.359	52.778	47.081	61.507	69.488	70.553	54.73	37.809	58.801	68.959	52.451	79.443	42.665	56.965	44.96	69.751	44.363	71.972	43.412	65.915	44.819	61.461	40.76	57.159	53.941	72.735	65.745	40.975	49.239	63.144	45.855	62.384	43.665	39.925	54.768	50.5	57.045	63.063	37.747
647.2	57.328	63.635	42.471	68.271	55.842	76.328	55.276	74.617	41.958	71.149	64.569	52.839	47.102	61.469	69.583	70.607	54.748	37.866	58.864	69.1	52.462	79.61	42.737	57.08	45.004	69.876	44.458	72.094	43.508	65.998	45.037	61.631	40.875	57.287	54.112	72.943	65.803	41.196	49.499	63.313	46.108	62.516	43.849	40.109	54.909	50.765	57.228	63.145	37.907
647.61	57.352	63.632	42.517	68.31	55.846	76.342	55.262	74.693	41.95	71.098	64.565	52.827	47.067	61.467	69.679	70.584	54.79	37.904	58.869	69.142	52.448	79.674	42.751	57.087	44.977	69.9	44.417	72.083	43.499	66.095	45.201	61.789	40.98	57.388	54.268	73.161	65.859	41.404	49.637	63.454	46.375	62.63	44.045	40.28	55.014	50.994	57.36	63.116	37.987
648.03	57.319	63.759	42.541	68.285	55.836	76.288	55.22	74.735	41.908	71.089	64.608	52.772	46.955	61.442	69.681	70.496	54.814	37.842	58.832	69.129	52.472	79.636	42.772	57.088	44.942	69.934	44.506	72.122	43.446	66.12	45.414	61.928	41.077	57.502	54.415	73.4	65.916	41.568	49.839	63.645	46.668	62.779	44.229	40.435	55.079	51.233	57.488	63.181	38.115
648.45	57.379	63.788	42.611	68.349	55.862	76.391	55.229	74.771	41.976	71.098	64.638	52.881	46.911	61.448	69.694	70.537	54.829	37.865	58.875	69.268	52.481	79.739	42.839	57.104	45.004	70.067	44.602	72.229	43.439	66.201	45.58	62.055	41.166	57.555	54.496	73.595	66.003	41.741	49.918	63.764	46.961	62.928	44.424	40.595	55.171	51.425	57.601	63.199	38.277
648.86	57.258	63.672	42.512	68.24	55.837	76.247	55.138	74.731	41.951	70.991	64.619	52.82	46.787	61.39	69.63	70.433	54.74	37.838	58.744	69.228	52.388	79.739	42.818	57.079	44.955	69.971	44.548	72.235	43.356	66.118	45.781	62.264	41.289	57.719	54.667	73.964	66.166	41.972	50.167	64.025	47.258	63.121	44.671	40.767	55.289	51.724	57.775	63.301	38.447
649.28	57.237	63.592	42.479	68.165	55.806	76.237	55.089	74.714	41.92	70.971	64.639	52.847	46.678	61.414	69.632	70.372	54.612	37.8	58.666	69.254	52.365	79.663	42.764	57.061	44.958	70.088	44.459	72.199	43.321	66.133	45.953	62.418	41.389	57.839	54.817	74.21	66.224	42.14	50.359	64.159	47.534	63.294	44.871	40.902	55.426	51.99	57.962	63.355	38.588
649.69	57.251	63.534	42.474	68.095	55.801	76.247	55.012	74.731	41.88	70.948	64.725	52.837	46.611	61.382	69.692	70.336	54.632	37.846	58.663	69.234	52.404	79.75	42.812	57.1	44.898	70.081	44.399	72.243	43.259	66.116	46.185	62.603	41.523	57.941	54.978	74.444	66.323	42.364	50.535	64.337	47.843	63.464	45.098	41.119	55.551	52.302	58.146	63.456	38.734
650.11	57.257	63.579	42.493	68.114	55.781	76.314	54.925	74.749	41.804	71.046	64.728	52.88	46.55	61.372	69.768	70.376	54.562	37.851	58.7	69.32	52.35	79.821	42.79	57.147	44.924	70.167	44.446	72.256	43.234	66.106	46.359	62.803	41.64	58.066	55.113	74.667	66.423	42.561	50.717	64.526	48.118	63.617	45.296	41.323	55.641	52.605	58.339	63.532	38.889
650.52	57.266	63.567	42.55	68.122	55.79	76.36	54.891	74.835	41.878	71.102	64.791	52.901	46.49	61.404	69.786	70.348	54.532	37.892	58.685	69.422	52.339	79.897	42.794	57.169	44.983	70.229	44.495	72.376	43.235	66.201	46.542	62.951	41.791	58.176	55.268	74.799	66.453	42.727	50.862	64.688	48.414	63.721	45.461	41.471	55.768	52.876	58.415	63.599	39.049
650.94	57.303	63.616	42.67	68.12	55.85	76.439	54.915	74.915	41.898	71.153	64.827	52.939	46.417	61.442	69.863	70.301	54.572	37.909	58.686	69.492	52.304	79.827	42.711	57.202	44.931	70.175	44.572	72.432	43.203	66.224	46.753	63.033	41.874	58.28	55.382	74.896	66.491	42.921	51.045	64.877	48.715	63.893	45.63	41.629	55.858	53.097	58.559	63.629	39.189
651.36	57.259	63.681	42.716	68.186	55.863	76.36	54.79	74.974	41.848	71.191	64.842	52.959	46.372	61.495	69.893	70.33	54.566	37.916	58.652	69.571	52.341	79.946	42.679	57.114	44.872	70.23	44.493	72.525	43.216	66.251	46.94	63.15	41.949	58.389	55.519	75.123	66.525	43.125	51.188	65.036	48.96	64.043	45.816	41.777	55.941	53.383	58.701	63.667	39.337
651.77	57.164	63.716	42.707	68.127	55.82	76.361	54.673	74.941	41.824	71.256	64.85	52.94	46.289	61.542	69.904	70.252	54.56	37.886	58.609	69.567	52.252	80.004	42.682	57.106	44.732	70.203	44.514	72.634	43.129	66.291	47.105	63.248	42.055	58.509	55.643	75.395	66.608	43.266	51.384	65.17	49.213	64.146	46.03	41.959	56.029	53.603	58.835	63.723	39.517
652.19	57.153	63.811	42.797	68.221	55.828	76.407	54.556	74.98	41.748	71.238	64.93	52.973	46.209	61.615	69.965	70.249	54.498	37.852	58.575	69.467	52.244	80.049	42.689	57.145	44.718	70.166	44.576	72.685	43.078	66.255	47.325	63.431	42.156	58.624	55.788	75.651	66.676	43.492	51.578	65.345	49.497	64.284	46.245	42.081	56.114	53.858	58.999	63.796	39.627
652.6	57.084	63.89	42.866	68.288	55.795	76.466	54.492	74.989	41.779	71.239	64.91	52.967	46.053	61.577	69.962	70.211	54.53	37.926	58.59	69.495	52.183	80.076	42.644	57.102	44.675	70.236	44.618	72.766	43.03	66.277	47.501	63.587	42.308	58.724	55.949	75.937	66.705	43.658	51.758	65.502	49.775	64.444	46.425	42.292	56.217	54.106	59.131	63.854	39.766
653.02	57.059	63.835	42.844	68.307	55.754	76.452	54.469	74.993	41.734	71.273	64.892	52.979	45.961	61.626	69.946	70.245	54.414	37.898	58.65	69.483	52.139	80.108	42.595	57.108	44.55	70.22	44.655	72.859	42.99	66.416	47.726	63.716	42.373	58.837	56.092	76.196	66.763	43.836	51.969	65.669	50.073	64.585	46.636	42.495	56.326	54.347	59.263	63.918	39.902
653.43	56.919	63.788	42.815	68.298	55.705	76.358	54.365	74.91	41.73	71.256	64.872	52.941	45.823	61.534	69.962	70.165	54.398	37.91	58.641	69.444	52.053	80.131	42.606	57.103	44.468	70.288	44.668	72.876	42.889	66.38	47.838	63.82	42.477	58.911	56.17	76.451	66.816	44.023	52.108	65.821	50.314	64.695	46.805	42.685	56.436	54.577	59.421	63.958	40.044
653.85	56.82	63.74	42.8	68.329	55.665	76.281	54.348	74.967	41.703	71.298	64.881	52.911	45.744	61.612	70.059	70.157	54.326	38.016	58.625	69.529	52.006	80.199	42.632	57.094	44.394	70.353	44.656	72.852	42.867	66.391	48.018	63.919	42.598	59	56.276	76.703	66.844	44.199	52.216	65.919	50.57	64.789	46.955	42.82	56.491	54.733	59.554	63.995	40.186
654.26	56.645	63.802	42.73	68.289	55.607	76.28	54.21	74.885	41.608	71.251	64.909	52.907	45.59	61.619	70.043	70.044	54.363	38.031	58.605	69.511	51.92	80.254	42.615	57.091	44.339	70.382	44.663	72.788	42.802	66.26	48.208	64.062	42.712	59.088	56.412	76.937	66.891	44.395	52.398	66.022	50.782	64.939	47.174	43.017	56.57	55.002	59.715	64.039	40.35
654.68	56.604	63.909	42.707	68.358	55.552	76.216	54.104	74.888	41.575	71.246	64.976	52.91	45.428	61.569	70.013	69.945	54.351	38.089	58.603	69.464	51.809	80.319	42.553	57.109	44.23	70.432	44.606	72.8	42.678	66.255	48.399	64.144	42.833	59.185	56.565	77.085	66.913	44.574	52.596	66.165	51.027	65.038	47.346	43.214	56.646	55.244	59.842	64.079	40.484
655.09	56.45	63.818	42.722	68.246	55.463	76.195	53.948	74.829	41.467	71.265	64.916	52.832	45.241	61.567	69.915	69.822	54.338	38.048	58.521	69.396	51.719	80.274	42.46	57.062	44.096	70.324	44.518	72.788	42.576	66.119	48.556	64.244	42.882	59.299	56.663	77.29	66.95	44.766	52.692	66.283	51.267	65.128	47.522	43.346	56.671	55.439	59.904	64.05	40.601
655.51	56.301	63.849	42.696	68.145	55.366	76.105	53.772	74.758	41.335	71.263	64.958	52.781	45.056	61.502	69.781	69.644	54.245	37.974	58.438	69.292	51.622	80.243	42.376	57.006	43.982	70.32	44.512	72.765	42.512	65.978	48.718	64.414	42.999	59.439	56.778	77.476	66.985	44.935	52.846	66.426	51.493	65.241	47.717	43.504	56.806	55.686	60.091	64.146	40.781
655.92	56.264	63.814	42.72	68.136	55.347	76.152	53.699	74.778	41.286	71.325	65.061	52.847	44.921	61.492	69.848	69.75	54.17	38.019	58.404	69.311	51.666	80.392	42.37	57.04	43.929	70.32	44.418	72.753	42.473	65.993	48.842	64.549	43.109	59.583	56.902	77.635	67.039	45.09	52.94	66.517	51.729	65.304	47.931	43.637	56.9	55.919	60.231	64.194	40.9
656.34	56.2	63.838	42.756	68.033	55.386	76.118	53.607	74.756	41.214	71.425	65.104	52.739	44.763	61.475	69.901	69.688	54.168	37.958	58.379	69.284	51.646	80.353	42.274	57.108	43.735	70.306	44.362	72.744	42.408	65.946	48.994	64.683	43.226	59.767	57.052	77.805	67.046	45.265	53.122	66.654	51.982	65.501	48.094	43.82	56.967	56.189	60.372	64.22	40.992
656.75	56.255	63.897	42.884	68.095	55.447	76.191	53.575	74.898	41.17	71.542	65.241	52.749	44.686	61.649	69.961	69.729	54.235	38.034	58.426	69.471	51.638	80.47	42.339	57.143	43.692	70.457	44.402	72.806	42.418	66.031	49.14	64.773	43.345	59.858	57.165	77.868	66.977	45.416	53.22	66.734	52.208	65.613	48.257	43.958	57.023	56.379	60.48	64.221	41.136
657.17	56.158	63.879	42.915	68.116	55.358	76.094	53.388	74.871	41.067	71.534	65.206	52.604	44.489	61.557	69.877	69.676	54.171	38.02	58.282	69.388	51.553	80.441	42.311	57.125	43.532	70.281	44.368	72.811	42.34	65.877	49.321	64.909	43.464	59.993	57.307	78.054	67.017	45.619	53.404	66.882	52.514	65.692	48.447	44.134	57.073	56.603	60.624	64.246	41.252
657.58	56.042	63.826	42.919	68.05	55.252	75.993	53.232	74.78	41.003	71.494	65.076	52.542	44.257	61.573	69.759	69.529	54.113	37.931	58.177	69.394	51.407	80.368	42.212	57.035	43.464	70.23	44.386	72.659	42.295	65.827	49.459	65.008	43.563	60.058	57.405	78.167	67.066	45.752	53.525	66.989	52.737	65.804	48.579	44.231	57.13	56.754	60.714	64.235	41.36
658	55.967	63.791	42.97	68.126	55.266	75.974	53.168	74.811	40.949	71.506	65.138	52.502	44.115	61.64	69.741	69.466	54.119	37.974	58.238	69.45	51.365	80.396	42.225	57.055	43.439	70.149	44.371	72.64	42.287	65.874	49.637	65.06	43.611	60.149	57.51	78.307	67.069	45.898	53.657	67.068	52.936	65.917	48.755	44.362	57.24	56.921	60.792	64.247	41.455
658.41	55.85	63.769	42.98	68.106	55.14	75.887	53.052	74.74	40.828	71.409	65.129	52.387	43.912	61.71	69.771	69.367	54.105	37.956	58.226	69.436	51.252	80.345	42.15	57.057	43.245	70.097	44.373	72.556	42.248	65.855	49.752	65.173	43.67	60.271	57.573	78.508	67.086	46.067	53.754	67.161	53.135	66.059	48.922	44.54	57.258	57.052	60.928	64.259	41.558
658.83	55.737	63.741	42.965	68.163	55.151	75.876	52.868	74.76	40.792	71.446	65.22	52.364	43.726	61.707	69.81	69.401	54.064	37.929	58.195	69.459	51.324	80.429	42.15	57.061	43.188	70.179	44.356	72.625	42.163	65.861	49.875	65.374	43.746	60.393	57.642	78.755	67.133	46.236	53.83	67.266	53.356	66.144	49.091	44.715	57.328	57.291	61.034	64.32	41.62
659.24	55.605	63.632	42.957	68.09	55.079	75.907	52.744	74.699	40.703	71.45	65.217	52.352	43.502	61.64	69.773	69.376	54.049	37.935	58.136	69.408	51.206	80.331	42.062	57.141	43.159	70.14	44.427	72.605	42.032	65.81	50.014	65.536	43.882	60.528	57.726	78.946	67.184	46.375	53.989	67.38	53.6	66.305	49.271	44.837	57.473	57.527	61.182	64.365	41.742
659.66	55.565	63.58	42.939	68.081	55.029	75.801	52.602	74.685	40.565	71.382	65.219	52.337	43.309	61.534	69.688	69.342	53.975	37.926	58.101	69.46	51.055	80.222	41.964	57.095	43.084	70.15	44.421	72.511	41.956	65.804	50.155	65.669	43.958	60.602	57.793	79.105	67.202	46.586	54.081	67.558	53.842	66.405	49.426	44.969	57.547	57.756	61.311	64.352	41.81
660.07	55.476	63.469	42.934	68.005	54.988	75.785	52.553	74.612	40.501	71.37	65.285	52.255	43.158	61.488	69.661	69.269	53.922	38	57.982	69.561	51	80.252	41.935	57.107	43.016	70.194	44.37	72.519	41.937	65.833	50.281	65.752	44.087	60.682	57.899	79.341	67.234	46.713	54.22	67.608	54.064	66.516	49.592	45.225	57.62	57.955	61.411	64.395	41.936
660.49	55.398	63.433	42.932	67.958	54.943	75.738	52.384	74.58	40.317	71.355	65.361	52.215	43.03	61.439	69.748	69.219	53.805	37.95	57.936	69.588	50.973	80.223	41.938	57.09	42.944	70.171	44.356	72.533	41.863	65.751	50.415	65.809	44.129	60.747	57.943	79.413	67.265	46.87	54.296	67.743	54.231	66.546	49.739	45.291	57.678	58.149	61.532	64.369	42.034
660.9	55.361	63.502	42.973	68.038	54.918	75.682	52.332	74.637	40.257	71.376	65.377	52.195	42.918	61.437	69.814	69.145	53.865	37.992	57.872	69.651	50.904	80.336	41.87	57.087	43.002	70.145	44.356	72.519	41.79	65.687	50.545	65.973	44.251	60.843	58.013	79.479	67.334	47.016	54.436	67.91	54.433	66.598	49.873	45.426	57.724	58.334	61.67	64.399	42.176
661.32	55.36	63.576	43.03	68.064	54.895	75.68	52.181	74.655	40.152	71.377	65.379	52.188	42.77	61.481	69.812	69.188	53.855	37.95	57.848	69.662	50.884	80.293	41.834	57.059	42.931	70.098	44.364	72.567	41.748	65.698	50.733	66.109	44.316	60.964	58.083	79.641	67.365	47.188	54.572	68.021	54.621	66.719	50.024	45.56	57.772	58.497	61.777	64.426	42.289
661.73	55.357	63.681	43.057	68.059	54.893	75.721	52.115	74.727	40.132	71.406	65.471	52.256	42.626	61.505	69.83	69.223	53.865	37.956	57.856	69.627	50.887	80.358	41.831	57.095	42.905	70.098	44.391	72.676	41.729	65.753	50.846	66.202	44.384	61.058	58.168	79.795	67.4	47.357	54.742	68.195	54.777	66.864	50.199	45.731	57.826	58.743	61.854	64.48	42.383
662.14	55.377	63.628	43.062	68.148	54.887	75.7	52.045	74.846	40.099	71.415	65.487	52.199	42.449	61.448	69.951	69.217	53.825	37.961	57.877	69.72	50.892	80.39	41.857	57.054	42.837	70.036	44.38	72.731	41.717	65.815	51.027	66.298	44.436	61.164	58.239	79.954	67.416	47.511	54.853	68.294	54.961	66.987	50.394	45.838	57.91	58.896	61.947	64.438	42.455
662.56	55.261	63.56	43.043	68.031	54.824	75.548	51.869	74.862	40.034	71.346	65.447	52.167	42.315	61.477	69.914	69.138	53.729	37.918	57.752	69.661	50.785	80.265	41.788	56.947	42.786	69.997	44.403	72.69	41.675	65.733	51.184	66.463	44.506	61.257	58.298	80.17	67.522	47.635	54.988	68.424	55.199	67.149	50.593	45.958	58.007	59.118	62.065	64.512	42.555
662.97	55.266	63.609	43.072	68.157	54.895	75.612	51.788	74.952	39.993	71.359	65.519	52.179	42.191	61.487	70.042	69.134	53.709	37.936	57.763	69.81	50.821	80.372	41.804	56.963	42.859	70.074	44.464	72.687	41.681	65.84	51.283	66.53	44.559	61.324	58.351	80.313	67.553	47.75	55.102	68.546	55.38	67.281	50.743	46.102	58.08	59.32	62.226	64.523	42.714
663.39	55.288	63.612	43.079	68.277	54.899	75.568	51.703	74.995	39.973	71.423	65.538	52.185	42.031	61.429	70.09	69.198	53.66	38.008	57.798	69.821	50.861	80.387	41.793	56.98	42.937	70.011	44.452	72.676	41.615	65.928	51.456	66.603	44.654	61.439	58.463	80.479	67.548	47.931	55.234	68.652	55.635	67.422	50.92	46.263	58.13	59.51	62.329	64.57	42.862
663.8	55.156	63.576	43.032	68.252	54.82	75.487	51.589	74.979	39.906	71.404	65.548	52.095	41.963	61.394	70.068	69.085	53.637	37.961	57.799	69.862	50.761	80.342	41.766	56.943	42.828	69.996	44.458	72.665	41.533	65.924	51.615	66.721	44.697	61.511	58.484	80.672	67.612	48.13	55.449	68.8	55.877	67.599	51.079	46.429	58.197	59.684	62.454	64.557	43.014
664.21	54.965	63.549	42.998	68.282	54.692	75.489	51.504	74.988	39.828	71.337	65.502	52.021	41.84	61.397	70.018	68.961	53.611	38.005	57.789	69.808	50.636	80.347	41.815	56.813	42.803	69.977	44.454	72.66	41.444	65.929	51.79	66.879	44.822	61.622	58.582	80.88	67.634	48.31	55.557	68.904	56.126	67.715	51.26	46.554	58.308	59.888	62.574	64.674	43.187
664.63	54.749	63.493	42.991	68.28	54.526	75.393	51.301	74.861	39.765	71.292	65.464	52.003	41.651	61.215	70.016	68.901	53.523	37.904	57.757	69.671	50.588	80.246	41.714	56.721	42.696	69.863	44.431	72.597	41.381	65.856	51.952	66.996	44.912	61.72	58.658	81.068	67.716	48.449	55.677	69.036	56.361	67.819	51.4	46.718	58.43	60.064	62.718	64.73	43.261
665.04	54.65	63.531	42.901	68.201	54.454	75.321	51.181	74.833	39.694	71.215	65.488	51.964	41.531	61.207	69.974	68.802	53.508	37.953	57.811	69.688	50.518	80.179	41.647	56.665	42.636	69.897	44.457	72.6	41.292	65.87	52.022	67.079	44.944	61.773	58.674	81.157	67.718	48.552	55.769	69.135	56.539	67.929	51.527	46.818	58.487	60.295	62.808	64.807	43.357
665.46	54.554	63.62	42.878	68.297	54.443	75.292	51.124	74.88	39.637	71.276	65.579	51.971	41.465	61.23	70.09	68.78	53.518	38.035	57.864	69.737	50.56	80.265	41.633	56.641	42.557	69.905	44.471	72.692	41.256	65.879	52.165	67.18	45.015	61.867	58.729	81.276	67.729	48.696	55.941	69.231	56.744	68.022	51.649	46.929	58.527	60.537	62.908	64.85	43.471
665.87	54.439	63.59	42.867	68.289	54.362	75.245	50.992	74.893	39.584	71.274	65.567	51.916	41.369	61.161	70.087	68.754	53.507	38.015	57.819	69.631	50.548	80.28	41.593	56.59	42.466	69.948	44.434	72.727	41.232	65.878	52.3	67.254	45.134	61.945	58.796	81.396	67.732	48.796	56.042	69.328	56.968	68.084	51.764	47.01	58.559	60.707	63.017	64.889	43.579
666.28	54.342	63.604	42.8	68.222	54.407	75.178	50.87	74.907	39.502	71.271	65.547	51.886	41.266	61.031	70.051	68.729	53.453	37.988	57.748	69.54	50.531	80.233	41.652	56.572	42.427	69.897	44.361	72.672	41.098	65.812	52.418	67.354	45.184	61.947	58.885	81.477	67.81	48.883	56.165	69.433	57.166	68.162	51.887	47.11	58.618	60.93	63.093	64.954	43.598
666.7	54.36	63.622	42.789	68.231	54.375	75.092	50.824	74.906	39.423	71.286	65.486	51.888	41.184	61.003	70.003	68.748	53.478	37.974	57.754	69.572	50.402	80.251	41.678	56.568	42.424	69.85	44.365	72.644	41.113	65.765	52.548	67.447	45.227	61.981	58.994	81.609	67.84	49.018	56.313	69.556	57.357	68.244	52.008	47.174	58.65	61.079	63.195	64.971	43.729
667.11	54.333	63.701	42.756	68.322	54.434	75.002	50.738	74.94	39.4	71.288	65.53	51.845	41.165	61.087	70.049	68.62	53.516	37.975	57.791	69.659	50.427	80.291	41.716	56.526	42.346	69.84	44.372	72.683	41.174	65.783	52.683	67.493	45.264	62.074	59.088	81.676	67.863	49.179	56.382	69.685	57.52	68.29	52.125	47.314	58.583	61.201	63.274	64.972	43.836
667.52	54.246	63.714	42.776	68.42	54.427	75.012	50.694	75.012	39.401	71.315	65.582	51.83	41.038	61.166	70.123	68.646	53.556	38.024	57.874	69.627	50.498	80.395	41.742	56.571	42.373	69.843	44.325	72.74	41.179	65.768	52.752	67.575	45.304	62.171	59.16	81.75	67.926	49.266	56.453	69.697	57.715	68.417	52.215	47.407	58.644	61.33	63.344	65.051	43.952
667.94	54.111	63.704	42.764	68.456	54.441	74.977	50.608	75.039	39.414	71.328	65.489	51.756	40.955	61.187	70.137	68.541	53.586	37.972	57.916	69.626	50.487	80.396	41.703	56.513	42.316	69.802	44.392	72.683	41.149	65.711	52.898	67.706	45.349	62.311	59.272	81.812	68.012	49.41	56.562	69.823	57.924	68.54	52.366	47.495	58.709	61.526	63.462	65.056	44.052
668.35	54.107	63.688	42.798	68.517	54.425	75.016	50.523	75.03	39.449	71.356	65.437	51.761	40.931	61.303	70.004	68.482	53.601	37.989	57.905	69.646	50.462	80.491	41.62	56.476	42.313	69.743	44.277	72.696	41.205	65.717	52.971	67.815	45.439	62.392	59.341	81.973	68.043	49.55	56.712	69.904	58.161	68.692	52.51	47.647	58.775	61.718	63.541	65.119	44.168
668.76	54.086	63.7	42.83	68.46	54.431	75.044	50.354	75.015	39.481	71.439	65.509	51.749	40.841	61.279	70.037	68.529	53.578	37.951	57.953	69.656	50.485	80.508	41.645	56.447	42.307	69.783	44.298	72.744	41.258	65.695	53.052	67.866	45.48	62.437	59.414	82.106	68.051	49.652	56.788	69.923	58.325	68.788	52.63	47.75	58.807	61.868	63.634	65.096	44.212
669.18	54.061	63.751	42.831	68.416	54.477	75.021	50.34	75.037	39.538	71.435	65.545	51.691	40.868	61.265	70.025	68.446	53.482	37.971	57.932	69.672	50.465	80.52	41.553	56.441	42.337	69.826	44.233	72.74	41.332	65.74	53.119	67.851	45.493	62.494	59.492	82.12	68.059	49.756	56.862	69.996	58.453	68.807	52.705	47.791	58.806	61.99	63.673	65.082	44.255
669.59	54.022	63.738	42.895	68.491	54.521	75.028	50.289	75.015	39.503	71.476	65.578	51.596	40.784	61.251	70.014	68.432	53.462	37.919	57.887	69.739	50.474	80.561	41.561	56.432	42.306	69.936	44.225	72.744	41.38	65.717	53.219	67.961	45.556	62.551	59.506	82.189	68.047	49.832	56.944	70.047	58.625	68.847	52.824	47.897	58.856	62.134	63.734	65.086	44.326
670	53.846	63.732	42.891	68.392	54.461	74.896	50.199	74.94	39.424	71.453	65.576	51.517	40.692	61.209	69.912	68.363	53.374	37.859	57.773	69.614	50.407	80.477	41.443	56.474	42.243	69.969	44.176	72.678	41.263	65.709	53.22	68.007	45.615	62.555	59.516	82.211	68.03	49.945	57.005	70.077	58.776	68.807	52.891	47.978	58.839	62.25	63.779	65.098	44.408
670.42	53.871	63.8	42.914	68.403	54.451	74.935	50.229	74.949	39.373	71.499	65.611	51.484	40.609	61.188	69.985	68.339	53.364	37.882	57.827	69.61	50.43	80.501	41.437	56.465	42.266	69.941	44.128	72.73	41.215	65.688	53.282	68.056	45.657	62.614	59.599	82.289	68.021	50.048	57.121	70.147	58.901	68.851	52.932	48.04	58.866	62.361	63.882	65.111	44.474
670.83	53.844	63.777	42.87	68.361	54.394	74.847	50.116	74.855	39.359	71.443	65.569	51.418	40.53	61.15	69.979	68.261	53.261	37.847	57.783	69.456	50.315	80.394	41.398	56.456	42.14	69.84	44.014	72.735	41.185	65.621	53.4	68.204	45.764	62.721	59.727	82.402	68.098	50.136	57.242	70.177	59.063	68.939	53.083	48.101	58.936	62.497	63.962	65.177	44.504
671.24	53.815	63.737	42.872	68.355	54.427	74.93	50.137	74.858	39.378	71.391	65.556	51.385	40.546	61.213	69.99	68.224	53.283	37.871	57.761	69.483	50.236	80.465	41.376	56.5	42.019	69.874	44.054	72.74	41.188	65.493	53.491	68.248	45.756	62.745	59.789	82.475	68.125	50.179	57.297	70.218	59.201	68.947	53.131	48.115	58.929	62.612	64.028	65.128	44.479
671.66	53.868	63.724	42.889	68.436	54.441	74.999	50.096	74.916	39.386	71.375	65.507	51.366	40.452	61.254	70.007	68.201	53.244	37.873	57.73	69.458	50.25	80.399	41.305	56.47	42.013	69.833	44.072	72.726	41.221	65.383	53.569	68.298	45.823	62.763	59.873	82.529	68.073	50.209	57.286	70.277	59.262	68.965	53.224	48.159	58.939	62.754	64.038	65.115	44.468
672.07	53.957	63.811	42.904	68.481	54.48	74.982	50.05	74.977	39.37	71.324	65.64	51.43	40.422	61.312	70.035	68.311	53.184	37.903	57.767	69.529	50.274	80.459	41.267	56.548	42.059	69.895	44.089	72.673	41.323	65.462	53.566	68.282	45.81	62.789	59.867	82.549	68.047	50.232	57.347	70.27	59.307	68.916	53.283	48.206	58.912	62.797	64.059	65.038	44.475
672.48	53.961	63.867	42.907	68.539	54.516	75.07	50.096	75.088	39.363	71.38	65.6	51.44	40.467	61.412	70.026	68.336	53.233	37.95	57.823	69.537	50.336	80.468	41.264	56.61	42.067	69.972	44.11	72.707	41.321	65.448	53.592	68.293	45.806	62.785	59.878	82.582	68.032	50.306	57.431	70.225	59.373	68.954	53.374	48.264	58.908	62.888	64.086	65.017	44.563
672.9	53.978	63.854	42.962	68.663	54.582	75.121	50.079	75.131	39.421	71.441	65.624	51.445	40.479	61.387	70.044	68.363	53.233	37.879	57.884	69.559	50.374	80.476	41.285	56.677	42.085	70.022	44.145	72.635	41.36	65.493	53.705	68.334	45.847	62.81	59.934	82.65	68.043	50.35	57.475	70.196	59.423	69.014	53.43	48.357	58.915	62.918	64.136	64.995	44.619
673.31	54.048	63.808	42.983	68.692	54.607	75.158	50.093	75.185	39.521	71.399	65.709	51.455	40.508	61.383	70.05	68.39	53.248	37.835	57.907	69.586	50.363	80.458	41.298	56.689	42.089	70.097	44.191	72.64	41.423	65.534	53.755	68.407	45.879	62.903	59.963	82.805	68.089	50.409	57.517	70.233	59.536	69.056	53.532	48.437	58.971	62.963	64.206	64.97	44.642
673.72	54.138	63.931	43.051	68.701	54.621	75.176	50.146	75.195	39.585	71.41	65.714	51.473	40.517	61.404	70.168	68.37	53.274	37.856	57.943	69.675	50.384	80.381	41.363	56.682	42.147	70.094	44.218	72.635	41.376	65.513	53.857	68.546	45.911	62.997	60.035	82.93	68.152	50.531	57.57	70.335	59.611	69.125	53.649	48.533	59.061	63.115	64.279	64.992	44.709
674.13	54.209	63.953	43.13	68.763	54.655	75.232	50.184	75.239	39.692	71.511	65.834	51.519	40.55	61.426	70.297	68.431	53.28	37.885	58.036	69.771	50.433	80.45	41.326	56.662	42.264	70.184	44.297	72.73	41.455	65.535	53.955	68.549	45.97	63.048	60.058	83.028	68.127	50.64	57.577	70.372	59.683	69.139	53.753	48.568	59.101	63.205	64.351	64.952	44.763
674.55	54.188	63.94	43.069	68.754	54.691	75.187	50.187	75.216	39.643	71.416	65.799	51.448	40.577	61.397	70.248	68.4	53.225	37.871	58.006	69.66	50.402	80.384	41.318	56.605	42.189	70.146	44.253	72.675	41.47	65.581	54.03	68.59	46.066	63.174	60.113	83.093	68.138	50.721	57.669	70.441	59.844	69.218	53.897	48.668	59.185	63.332	64.399	64.983	44.833
674.96	54.252	63.952	43.104	68.709	54.706	75.27	50.237	75.228	39.649	71.461	65.842	51.449	40.567	61.371	70.182	68.47	53.114	37.865	58.038	69.65	50.356	80.355	41.269	56.644	42.245	70.225	44.249	72.677	41.431	65.572	54.096	68.68	46.124	63.209	60.187	83.261	68.182	50.765	57.731	70.517	59.977	69.278	54.029	48.744	59.334	63.44	64.494	65.009	44.862
675.37	54.237	63.99	43.054	68.647	54.723	75.326	50.211	75.21	39.7	71.426	65.89	51.435	40.632	61.384	70.149	68.483	53.002	37.795	58.002	69.667	50.343	80.295	41.308	56.582	42.267	70.214	44.253	72.679	41.475	65.585	54.266	68.762	46.177	63.273	60.217	83.436	68.201	50.856	57.847	70.661	60.071	69.356	54.163	48.853	59.342	63.602	64.527	65.059	44.9
675.78	54.286	64.047	43.052	68.688	54.743	75.338	50.276	75.282	39.725	71.457	65.98	51.492	40.703	61.39	70.193	68.603	53.051	37.892	58.095	69.719	50.321	80.215	41.27	56.667	42.301	70.278	44.196	72.678	41.53	65.643	54.295	68.735	46.206	63.249	60.198	83.48	68.167	50.914	57.832	70.679	60.098	69.352	54.2	48.868	59.392	63.671	64.571	65.03	44.875
676.2	54.226	64.08	43.112	68.699	54.826	75.327	50.383	75.433	39.767	71.499	66.074	51.569	40.759	61.39	70.243	68.695	53.069	37.907	58.16	69.683	50.34	80.217	41.343	56.737	42.298	70.27	44.282	72.628	41.517	65.725	54.361	68.791	46.258	63.327	60.242	83.567	68.18	50.998	57.903	70.692	60.15	69.411	54.306	48.946	59.386	63.724	64.635	65.038	44.891
676.61	54.179	64.01	43.122	68.664	54.857	75.34	50.473	75.454	39.784	71.373	66.071	51.486	40.813	61.379	70.212	68.657	53.074	37.959	58.116	69.692	50.274	80.125	41.304	56.751	42.245	70.291	44.264	72.516	41.482	65.736	54.415	68.818	46.288	63.41	60.278	83.62	68.17	51.09	57.945	70.758	60.194	69.474	54.381	49.032	59.434	63.808	64.673	65.09	44.926
677.02	54.218	63.996	43.176	68.707	54.879	75.433	50.546	75.488	39.797	71.382	66.128	51.59	40.883	61.423	70.282	68.706	53.136	37.983	58.213	69.78	50.398	80.224	41.335	56.811	42.28	70.274	44.324	72.563	41.496	65.621	54.468	68.957	46.355	63.494	60.351	83.772	68.236	51.14	58.034	70.79	60.283	69.515	54.527	49.147	59.561	63.995	64.783	65.108	44.968
677.43	54.195	64.053	43.132	68.699	54.909	75.417	50.502	75.482	39.836	71.271	66.095	51.572	41.038	61.379	70.235	68.778	53.112	38.05	58.276	69.763	50.391	80.144	41.32	56.792	42.298	70.207	44.31	72.468	41.46	65.61	54.548	68.957	46.397	63.531	60.401	83.822	68.312	51.224	58.081	70.861	60.404	69.555	54.593	49.211	59.577	64.14	64.808	65.158	45.002
677.85	54.238	64.033	43.137	68.668	54.94	75.463	50.579	75.534	39.901	71.173	66.131	51.633	41.146	61.434	70.247	68.829	53.131	38.083	58.379	69.789	50.385	80.072	41.396	56.726	42.374	70.137	44.302	72.462	41.506	65.61	54.624	69.014	46.395	63.64	60.482	83.869	68.382	51.29	58.18	71.003	60.553	69.645	54.653	49.28	59.676	64.307	64.876	65.195	45.058
678.26	54.197	63.999	43.116	68.705	54.938	75.582	50.623	75.551	39.947	71.186	66.151	51.642	41.302	61.495	70.33	68.923	53.168	38.086	58.428	69.851	50.406	80.128	41.462	56.729	42.368	70.115	44.308	72.428	41.609	65.688	54.696	69.082	46.414	63.671	60.477	83.879	68.442	51.386	58.184	71.056	60.678	69.648	54.75	49.376	59.673	64.407	64.886	65.182	45.096
678.67	54.237	64.039	43.169	68.734	54.988	75.686	50.791	75.671	40.034	71.255	66.182	51.691	41.475	61.542	70.37	68.975	53.315	38.109	58.552	69.911	50.558	80.175	41.527	56.699	42.485	70.173	44.426	72.386	41.672	65.715	54.741	69.105	46.418	63.678	60.507	83.926	68.401	51.466	58.223	71.119	60.78	69.629	54.8	49.472	59.647	64.461	64.923	65.165	45.159
679.08	54.268	64.086	43.16	68.707	54.965	75.774	50.911	75.74	40.123	71.233	66.234	51.781	41.64	61.563	70.341	69.044	53.317	38.119	58.59	69.967	50.621	80.088	41.587	56.683	42.545	70.186	44.405	72.387	41.773	65.745	54.789	69.181	46.483	63.71	60.543	83.971	68.412	51.532	58.266	71.154	60.873	69.686	54.901	49.564	59.659	64.555	64.989	65.234	45.262
679.49	54.335	64.2	43.195	68.649	55.187	75.76	51.07	75.74	40.225	71.213	66.326	51.867	41.847	61.531	70.426	69.115	53.376	38.179	58.658	70.022	50.709	80.2	41.723	56.739	42.655	70.288	44.43	72.461	41.861	65.85	54.78	69.251	46.493	63.781	60.569	84.002	68.43	51.581	58.307	71.21	61.013	69.714	54.95	49.631	59.713	64.62	65.051	65.278	45.357
679.91	54.451	64.222	43.203	68.683	55.315	75.9	51.151	75.769	40.321	71.31	66.326	51.964	42.052	61.532	70.439	69.168	53.497	38.142	58.646	69.969	50.799	80.201	41.816	56.743	42.668	70.27	44.427	72.54	41.849	65.831	54.849	69.313	46.512	63.854	60.656	84.059	68.457	51.649	58.317	71.312	61.128	69.709	54.991	49.708	59.737	64.721	65.071	65.306	45.39
680.32	54.587	64.174	43.191	68.663	55.333	75.919	51.183	75.72	40.419	71.255	66.342	51.906	42.187	61.494	70.472	69.284	53.442	38.106	58.62	69.985	50.838	80.15	41.866	56.741	42.769	70.179	44.421	72.456	41.865	65.874	54.944	69.385	46.554	63.957	60.731	84.154	68.475	51.711	58.338	71.367	61.252	69.72	55.041	49.77	59.72	64.818	65.174	65.342	45.429
680.73	54.632	64.24	43.257	68.662	55.429	75.965	51.406	75.789	40.485	71.331	66.279	51.976	42.375	61.584	70.551	69.472	53.543	38.162	58.657	70.025	50.962	80.265	41.955	56.723	42.847	70.132	44.435	72.524	41.917	65.929	54.92	69.374	46.592	64.043	60.757	84.147	68.521	51.79	58.368	71.422	61.291	69.744	55.121	49.822	59.724	64.92	65.191	65.369	45.463
681.14	54.727	64.312	43.298	68.648	55.487	76.098	51.589	75.753	40.468	71.354	66.26	51.982	42.621	61.541	70.551	69.5	53.555	38.151	58.651	69.967	51.03	80.272	41.989	56.798	42.87	70.094	44.395	72.505	41.971	65.922	54.942	69.41	46.62	64.084	60.809	84.147	68.501	51.888	58.392	71.472	61.333	69.819	55.189	49.875	59.743	65.017	65.241	65.455	45.476
681.55	54.816	64.3	43.268	68.646	55.642	76.209	51.786	75.812	40.576	71.389	66.328	51.994	42.849	61.595	70.534	69.663	53.595	38.112	58.748	69.951	51.144	80.364	41.973	56.868	42.947	70.142	44.383	72.508	42.096	66.031	54.924	69.411	46.635	64.062	60.834	84.153	68.507	51.959	58.401	71.482	61.443	69.831	55.264	49.914	59.739	65.04	65.274	65.377	45.498
681.97	55.011	64.313	43.279	68.688	55.717	76.264	51.947	75.807	40.666	71.396	66.366	51.995	43.115	61.601	70.483	69.76	53.622	38.111	58.814	69.959	51.216	80.316	42.035	56.848	43.01	70.115	44.449	72.518	42.191	66.076	54.924	69.412	46.604	64.159	60.865	84.193	68.51	51.967	58.399	71.46	61.533	69.814	55.279	49.973	59.751	65.074	65.352	65.364	45.549
682.38	55.089	64.386	43.412	68.733	55.815	76.442	52.198	75.892	40.879	71.418	66.452	52.135	43.423	61.619	70.611	69.846	53.716	38.165	58.937	70.083	51.432	80.389	42.121	56.982	43.213	70.223	44.501	72.592	42.343	66.2	55.009	69.452	46.613	64.185	60.881	84.226	68.558	52.001	58.465	71.461	61.556	69.851	55.306	50.046	59.788	65.131	65.418	65.367	45.603
682.79	55.229	64.4	43.468	68.748	55.871	76.457	52.382	75.928	41.038	71.339	66.411	52.243	43.729	61.642	70.694	70	53.799	38.17	58.942	70.116	51.626	80.476	42.293	57.052	43.317	70.177	44.622	72.563	42.449	66.299	55.002	69.411	46.619	64.248	60.864	84.197	68.489	52.055	58.499	71.42	61.585	69.834	55.362	50.063	59.75	65.181	65.381	65.377	45.608
683.2	55.371	64.439	43.554	68.803	55.989	76.485	52.635	75.981	41.148	71.35	66.473	52.291	44.069	61.598	70.833	70.164	53.976	38.222	58.982	70.18	51.792	80.535	42.383	57.126	43.436	70.195	44.64	72.574	42.53	66.318	54.985	69.412	46.665	64.34	60.927	84.183	68.477	52.069	58.507	71.406	61.644	69.794	55.431	50.104	59.802	65.231	65.491	65.347	45.606
683.61	55.571	64.377	43.569	68.753	56.06	76.536	52.79	75.847	41.206	71.238	66.476	52.27	44.339	61.564	70.774	70.249	53.963	38.103	58.958	70.145	51.922	80.527	42.5	57.142	43.521	70.112	44.652	72.543	42.557	66.342	55.018	69.442	46.64	64.424	60.96	84.245	68.471	52.103	58.591	71.408	61.755	69.834	55.505	50.164	59.808	65.356	65.502	65.432	45.694
684.02	55.692	64.445	43.466	68.709	56.109	76.561	52.955	75.824	41.323	71.125	66.47	52.239	44.572	61.543	70.795	70.388	53.998	38.118	58.937	70.111	52.006	80.467	42.532	57.134	43.641	70.11	44.666	72.49	42.658	66.34	55.037	69.463	46.637	64.478	61.002	84.252	68.497	52.1	58.583	71.471	61.84	69.791	55.54	50.15	59.869	65.476	65.522	65.526	45.737
684.43	55.865	64.522	43.43	68.742	56.205	76.621	53.134	75.874	41.422	71.146	66.538	52.372	44.937	61.591	70.741	70.538	54.033	38.142	59.011	70.133	52.212	80.511	42.666	57.078	43.794	70.028	44.672	72.587	42.832	66.375	55.062	69.445	46.65	64.504	61.018	84.313	68.514	52.078	58.617	71.478	61.941	69.825	55.597	50.143	59.848	65.536	65.475	65.504	45.7
684.85	55.929	64.585	43.4	68.786	56.303	76.748	53.304	75.831	41.548	71.165	66.575	52.432	45.23	61.556	70.745	70.67	54.13	38.083	59.015	70.115	52.274	80.48	42.745	57.097	43.864	70.061	44.667	72.492	42.882	66.537	55.134	69.467	46.697	64.563	61.041	84.345	68.586	52.16	58.657	71.532	62.078	69.881	55.685	50.168	59.894	65.55	65.543	65.585	45.748
685.26	56.102	64.569	43.358	68.797	56.373	76.86	53.63	75.915	41.664	71.247	66.629	52.538	45.507	61.581	70.808	70.707	54.256	38.078	59.038	70.187	52.385	80.511	42.839	57.219	44.031	70.093	44.763	72.509	43.065	66.564	55.178	69.488	46.696	64.613	61.07	84.37	68.488	52.141	58.671	71.505	62.107	69.858	55.762	50.15	59.874	65.522	65.556	65.538	45.781
685.67	56.394	64.653	43.39	68.906	56.454	77.027	53.835	75.946	41.874	71.355	66.728	52.592	45.884	61.628	70.813	70.851	54.394	38.092	59.091	70.269	52.562	80.641	42.928	57.288	44.17	70.144	44.827	72.684	43.22	66.651	55.245	69.516	46.771	64.615	61.022	84.394	68.518	52.117	58.698	71.482	62.147	69.879	55.848	50.191	59.853	65.528	65.649	65.543	45.778
686.08	56.572	64.763	43.433	68.966	56.597	77.085	54.076	75.928	42.081	71.331	66.769	52.664	46.236	61.64	70.667	71.004	54.416	38.096	59.059	70.317	52.715	80.7	43.034	57.44	44.342	70.177	44.869	72.747	43.316	66.698	55.3	69.53	46.783	64.72	61.13	84.496	68.481	52.229	58.737	71.511	62.223	69.909	55.906	50.22	59.939	65.587	65.748	65.559	45.842
686.49	56.648	64.724	43.387	69.018	56.664	77.083	54.249	75.861	42.2	71.278	66.746	52.701	46.596	61.623	70.659	71.117	54.466	38.132	59.046	70.36	52.825	80.604	43.089	57.507	44.414	70.182	44.841	72.788	43.385	66.712	55.352	69.603	46.834	64.785	61.113	84.502	68.487	52.243	58.761	71.568	62.25	69.944	55.971	50.229	59.998	65.658	65.784	65.571	45.837
686.9	56.772	64.7	43.47	69.057	56.743	77.014	54.415	75.727	42.301	71.267	66.776	52.672	46.84	61.579	70.579	71.148	54.55	38.106	59.119	70.288	52.984	80.608	43.156	57.604	44.533	70.182	44.858	72.754	43.428	66.821	55.337	69.633	46.844	64.85	61.081	84.486	68.514	52.281	58.763	71.592	62.253	69.956	56.009	50.227	60.044	65.649	65.775	65.507	45.805
687.31	56.919	64.644	43.488	69.111	56.696	77.029	54.581	75.696	42.361	71.262	66.768	52.688	47.153	61.64	70.479	71.226	54.627	38.128	59.152	70.237	53.033	80.558	43.21	57.562	44.617	70.133	44.913	72.775	43.525	66.824	55.415	69.587	46.852	64.899	61.095	84.457	68.511	52.351	58.804	71.53	62.262	69.995	56.073	50.239	60.043	65.642	65.836	65.485	45.796
687.72	57.021	64.582	43.462	69.092	56.724	76.961	54.824	75.713	42.477	71.203	66.757	52.681	47.509	61.636	70.483	71.239	54.595	38.106	59.189	70.285	53.184	80.512	43.175	57.594	44.739	70.056	44.935	72.699	43.612	66.872	55.462	69.599	46.824	64.908	61.116	84.494	68.528	52.407	58.863	71.538	62.284	70.099	56.163	50.263	60.048	65.711	65.947	65.494	45.81
688.14	57.146	64.606	43.481	69.071	56.848	77.014	55.03	75.689	42.592	71.209	66.792	52.81	47.883	61.654	70.505	71.32	54.692	38.18	59.212	70.283	53.324	80.484	43.247	57.528	44.891	70.09	44.977	72.792	43.785	66.879	55.434	69.55	46.819	64.948	61.081	84.429	68.552	52.406	58.867	71.58	62.3	70.076	56.209	50.266	60.071	65.698	65.854	65.434	45.785
688.55	57.221	64.628	43.456	69.124	56.94	77.14	55.138	75.618	42.67	71.226	66.838	52.836	48.276	61.636	70.466	71.281	54.692	38.191	59.225	70.242	53.427	80.364	43.284	57.561	45.019	70.08	44.993	72.829	43.903	66.773	55.524	69.592	46.814	64.943	61.129	84.535	68.561	52.377	58.851	71.676	62.379	70.1	56.246	50.287	60.134	65.749	65.913	65.408	45.839
688.96	57.37	64.627	43.488	69.144	57.104	77.166	55.403	75.648	42.867	71.281	66.923	52.93	48.599	61.69	70.512	71.451	54.723	38.264	59.327	70.367	53.588	80.374	43.341	57.603	45.228	70.092	45.065	72.871	44.026	66.889	55.523	69.551	46.818	64.931	61.103	84.582	68.537	52.381	58.853	71.723	62.447	69.997	56.296	50.304	60.119	65.818	65.959	65.364	45.856
689.37	57.41	64.677	43.445	69.054	57.142	77.128	55.546	75.618	42.878	71.194	66.977	52.974	48.899	61.616	70.452	71.476	54.706	38.224	59.278	70.362	53.663	80.318	43.407	57.569	45.303	69.996	45.072	72.764	44.093	66.748	55.518	69.58	46.872	65.017	61.066	84.61	68.516	52.347	58.911	71.766	62.472	70.03	56.296	50.325	60.119	65.885	65.986	65.382	45.867
689.78	57.502	64.721	43.466	69.022	57.201	77.219	55.74	75.611	42.921	71.162	66.876	53.078	49.218	61.626	70.483	71.542	54.767	38.22	59.303	70.402	53.783	80.339	43.379	57.674	45.392	69.966	45.019	72.75	44.173	66.738	55.568	69.648	46.943	65.054	61.126	84.624	68.52	52.388	59.005	71.788	62.499	70.087	56.347	50.307	60.151	65.988	66.019	65.411	45.889
690.19	57.695	64.709	43.44	69.071	57.226	77.263	55.913	75.638	42.943	71.213	66.9	53.115	49.501	61.656	70.521	71.61	54.792	38.218	59.392	70.433	53.867	80.354	43.42	57.672	45.56	69.928	45.027	72.719	44.218	66.711	55.558	69.612	46.999	65.108	61.138	84.636	68.458	52.42	58.987	71.805	62.489	70.026	56.394	50.315	60.133	66.065	66.042	65.368	45.879
690.6	57.762	64.707	43.412	69.121	57.33	77.376	56.138	75.685	42.973	71.232	67.042	53.088	49.788	61.678	70.43	71.579	54.846	38.254	59.412	70.361	53.911	80.34	43.473	57.613	45.667	69.923	44.917	72.74	44.295	66.684	55.585	69.695	47.03	65.124	61.143	84.741	68.527	52.461	59.016	71.854	62.563	70.098	56.395	50.357	60.122	66.135	66.13	65.393	45.889
691.01	57.858	64.745	43.399	69.073	57.426	77.5	56.335	75.727	43.047	71.275	67.098	53.178	50.102	61.771	70.355	71.672	54.859	38.3	59.53	70.434	54.048	80.382	43.455	57.703	45.733	69.947	45.056	72.717	44.401	66.756	55.622	69.654	47.012	65.07	61.072	84.78	68.507	52.517	59.016	71.889	62.601	70.13	56.421	50.332	60.133	66.16	66.111	65.356	45.925
691.42	58.03	64.922	43.47	69.225	57.577	77.61	56.498	75.866	43.227	71.445	67.064	53.345	50.404	61.846	70.436	71.824	54.966	38.364	59.601	70.504	54.165	80.491	43.541	57.765	45.867	70.025	45.213	72.826	44.608	66.816	55.68	69.69	47.044	65.075	61.066	84.773	68.529	52.523	59.03	71.925	62.586	70.132	56.448	50.344	60.111	66.112	66.14	65.31	45.922
691.83	58.203	64.857	43.497	69.317	57.645	77.7	56.662	75.896	43.34	71.456	67.091	53.373	50.714	61.857	70.475	71.874	55.023	38.39	59.666	70.634	54.313	80.521	43.663	57.856	45.975	70.094	45.282	72.827	44.721	66.857	55.788	69.723	47.103	65.097	61.122	84.776	68.564	52.555	59.102	71.917	62.617	70.199	56.497	50.378	60.113	66.141	66.246	65.29	45.943
692.24	58.343	64.979	43.575	69.487	57.74	77.829	56.884	75.955	43.494	71.59	67.211	53.468	51.044	61.95	70.552	72.006	55.12	38.389	59.822	70.75	54.43	80.576	43.706	58.043	46.143	70.266	45.342	72.899	44.852	66.964	55.832	69.807	47.189	65.172	61.142	84.862	68.614	52.595	59.133	71.946	62.681	70.185	56.456	50.382	60.185	66.192	66.336	65.347	46.007
692.65	58.527	64.966	43.634	69.507	57.841	77.839	57.102	76.076	43.582	71.646	67.231	53.464	51.344	62.033	70.589	72.103	55.191	38.506	59.967	70.712	54.59	80.511	43.764	58.091	46.276	70.342	45.439	72.93	44.978	67.056	55.805	69.812	47.188	65.189	61.147	84.876	68.53	52.594	59.183	71.955	62.696	70.162	56.432	50.412	60.177	66.27	66.364	65.304	46.035
693.06	58.625	64.966	43.651	69.439	57.854	77.801	57.165	76.016	43.652	71.58	67.13	53.436	51.63	62.051	70.569	72.178	55.236	38.466	59.985	70.645	54.656	80.52	43.719	58.067	46.355	70.216	45.421	72.903	45.009	67.045	55.799	69.857	47.207	65.258	61.195	84.942	68.625	52.678	59.225	71.996	62.751	70.23	56.474	50.48	60.252	66.384	66.466	65.312	46.035
693.47	58.706	65.077	43.731	69.476	58.025	77.875	57.376	76.059	43.734	71.685	67.118	53.526	51.966	62.04	70.648	72.357	55.314	38.516	60.006	70.706	54.794	80.535	43.767	58.174	46.43	70.344	45.47	72.847	45.151	67.098	55.766	69.929	47.169	65.305	61.258	85.032	68.575	52.732	59.226	72.005	62.805	70.261	56.498	50.525	60.315	66.443	66.478	65.335	46.079
693.88	58.711	64.979	43.73	69.444	58.046	77.699	57.436	76.064	43.795	71.599	67.148	53.576	52.104	61.96	70.687	72.263	55.381	38.486	59.984	70.63	54.857	80.416	43.799	58.189	46.512	70.299	45.504	72.757	45.195	67.037	55.7	69.905	47.21	65.259	61.177	84.958	68.536	52.635	59.233	71.951	62.78	70.248	56.501	50.564	60.244	66.432	66.407	65.292	45.993
694.29	58.868	65.064	43.694	69.403	58.123	77.711	57.602	76.13	43.841	71.597	67.247	53.593	52.317	61.944	70.648	72.439	55.397	38.471	60.026	70.563	55.003	80.503	43.837	58.224	46.689	70.347	45.595	72.807	45.226	67.011	55.704	69.838	47.229	65.315	61.189	85.013	68.519	52.632	59.242	71.93	62.813	70.285	56.529	50.571	60.264	66.499	66.412	65.377	46.005
694.7	58.966	65.055	43.616	69.407	58.189	77.775	57.695	76.214	43.891	71.61	67.207	53.698	52.555	61.954	70.658	72.548	55.404	38.509	59.98	70.698	55.015	80.563	43.857	58.234	46.784	70.286	45.662	72.883	45.328	67.018	55.75	69.788	47.242	65.343	61.232	85.079	68.48	52.627	59.295	71.969	62.862	70.289	56.562	50.601	60.279	66.573	66.475	65.401	46.037
695.11	58.993	65.067	43.561	69.348	58.185	77.81	57.787	76.197	43.967	71.55	67.159	53.74	52.811	61.994	70.686	72.589	55.427	38.479	60.002	70.716	55.05	80.47	43.783	58.315	46.892	70.251	45.595	72.735	45.362	66.95	55.658	69.761	47.257	65.339	61.198	85.062	68.441	52.595	59.274	72.024	62.821	70.199	56.549	50.571	60.23	66.612	66.454	65.428	46.021
695.52	59.039	65.165	43.604	69.416	58.208	77.932	57.915	76.125	43.99	71.583	67.157	53.699	52.993	61.985	70.685	72.744	55.424	38.528	59.975	70.781	55.14	80.504	43.841	58.355	47.003	70.295	45.659	72.678	45.441	66.886	55.677	69.753	47.336	65.345	61.142	85.005	68.402	52.573	59.296	72.083	62.845	70.161	56.574	50.574	60.255	66.635	66.461	65.347	46.034
695.93	59.158	65.317	43.592	69.518	58.337	78.019	58.093	76.189	44.076	71.594	67.17	53.745	53.165	62.072	70.772	72.737	55.419	38.503	60.06	70.858	55.275	80.632	43.895	58.553	47.072	70.333	45.695	72.729	45.527	66.946	55.64	69.769	47.354	65.331	61.115	85.01	68.358	52.603	59.264	72.044	62.852	70.112	56.534	50.581	60.243	66.668	66.503	65.308	46.011
696.34	59.321	65.357	43.602	69.476	58.383	77.969	58.27	76.17	44.178	71.616	67.28	53.78	53.323	62.14	70.816	72.826	55.459	38.532	60.141	70.94	55.389	80.746	43.92	58.681	47.169	70.438	45.782	72.745	45.55	67.108	55.593	69.76	47.353	65.35	61.081	85.024	68.323	52.644	59.288	72.005	62.859	70.019	56.564	50.537	60.184	66.638	66.492	65.353	45.976
696.75	59.314	65.352	43.519	69.471	58.277	77.931	58.322	76.151	44.174	71.54	67.149	53.764	53.489	62.167	70.749	72.797	55.444	38.44	60.081	70.847	55.273	80.728	43.951	58.649	47.163	70.376	45.719	72.585	45.535	67.021	55.609	69.799	47.369	65.385	61.118	85.017	68.345	52.649	59.311	71.987	62.867	70.089	56.599	50.563	60.207	66.602	66.431	65.34	46.005
697.16	59.411	65.333	43.585	69.71	58.336	78.067	58.423	76.118	44.337	71.609	67.114	53.793	53.646	62.234	70.757	72.887	55.568	38.546	60.131	70.903	55.334	80.826	44.02	58.741	47.229	70.44	45.811	72.718	45.609	67.244	55.651	69.755	47.305	65.382	61.154	84.989	68.325	52.653	59.295	71.928	62.895	70.005	56.668	50.536	60.206	66.661	66.379	65.369	45.993
697.57	59.441	65.328	43.545	69.77	58.408	78.067	58.5	76.234	44.407	71.694	67.21	53.788	53.815	62.325	70.737	72.987	55.629	38.56	60.168	70.958	55.386	80.955	44.082	58.826	47.27	70.45	45.758	72.771	45.686	67.31	55.672	69.748	47.309	65.373	61.133	84.959	68.36	52.671	59.275	71.995	62.921	70.02	56.686	50.577	60.204	66.69	66.359	65.348	45.981
697.98	59.522	65.352	43.55	69.703	58.379	78.134	58.557	76.217	44.53	71.79	67.191	53.775	54	62.317	70.689	73.093	55.663	38.591	60.177	70.953	55.432	81.014	44.121	58.854	47.221	70.438	45.809	72.749	45.719	67.257	55.645	69.753	47.267	65.372	61.13	84.985	68.37	52.678	59.284	71.962	62.942	70.102	56.667	50.56	60.165	66.64	66.374	65.374	45.971
698.39	59.537	65.372	43.539	69.741	58.325	78.157	58.57	76.172	44.573	71.839	67.145	53.804	54.225	62.314	70.763	73.177	55.744	38.574	60.254	71.041	55.5	80.993	44.053	58.962	47.199	70.446	45.875	72.719	45.729	67.279	55.704	69.761	47.272	65.418	61.153	84.96	68.334	52.66	59.3	71.953	62.959	70.122	56.772	50.625	60.227	66.627	66.403	65.374	46.014
698.8	59.672	65.383	43.596	69.87	58.459	78.207	58.692	76.236	44.681	71.926	67.155	53.83	54.405	62.296	70.808	73.147	55.794	38.595	60.287	71.02	55.544	81.036	44.163	58.976	47.259	70.436	45.869	72.82	45.79	67.324	55.663	69.771	47.308	65.441	61.195	84.924	68.326	52.594	59.34	71.888	62.951	70.1	56.747	50.635	60.191	66.628	66.401	65.362	46.015
699.21	59.616	65.241	43.498	69.765	58.373	78.2	58.777	76.142	44.73	71.875	67.255	53.794	54.514	62.252	70.757	73.017	55.743	38.59	60.302	70.995	55.662	80.962	44.147	58.985	47.285	70.341	45.739	72.788	45.724	67.258	55.679	69.854	47.337	65.523	61.235	84.99	68.339	52.63	59.353	71.899	63.022	70.115	56.78	50.647	60.207	66.692	66.455	65.38	46.02
699.62	59.724	65.323	43.63	69.881	58.509	78.251	58.906	76.217	44.796	72.05	67.368	53.914	54.809	62.399	70.899	73.179	55.807	38.641	60.392	71.052	55.782	81.141	44.2	59.092	47.41	70.394	45.849	72.88	45.802	67.387	55.646	69.857	47.347	65.575	61.2	85.043	68.321	52.672	59.314	71.893	63.029	70.109	56.775	50.676	60.216	66.674	66.454	65.38	46.024
700.03	59.732	65.305	43.638	69.815	58.48	78.22	58.912	76.105	44.764	71.941	67.308	53.884	54.839	62.369	70.951	73.244	55.83	38.597	60.322	70.991	55.854	81.126	44.232	59.104	47.422	70.311	45.867	72.853	45.79	67.372	55.627	69.827	47.282	65.549	61.196	85.002	68.246	52.683	59.265	71.877	62.985	70.081	56.81	50.683	60.161	66.65	66.448	65.349	46.014
700.44	59.664	65.282	43.626	69.833	58.382	78.205	58.952	76.042	44.752	71.9	67.203	53.875	54.966	62.299	70.994	73.254	55.763	38.525	60.248	70.94	55.758	81.188	44.224	59.172	47.497	70.207	45.843	72.766	45.861	67.274	55.645	69.835	47.301	65.592	61.168	84.994	68.252	52.69	59.214	71.877	63.004	70.137	56.885	50.695	60.117	66.641	66.462	65.328	46.007
700.85	59.842	65.321	43.698	70.004	58.537	78.308	59.091	76.031	44.855	71.878	67.341	54.057	55.121	62.368	71.101	73.31	55.776	38.599	60.368	71.089	55.871	81.261	44.355	59.231	47.587	70.3	45.902	72.839	45.933	67.424	55.689	69.862	47.313	65.646	61.199	85.002	68.262	52.694	59.261	71.866	63.008	70.136	56.91	50.743	60.13	66.713	66.509	65.378	46.048
701.26	59.895	65.324	43.733	70.063	58.541	78.301	59.106	76.009	44.872	71.85	67.446	54.103	55.212	62.476	71.177	73.349	55.754	38.582	60.388	71.118	55.924	81.315	44.406	59.214	47.685	70.184	45.967	72.852	45.971	67.479	55.708	69.814	47.342	65.66	61.186	84.982	68.255	52.702	59.224	71.829	63.045	70.14	56.921	50.729	60.041	66.703	66.513	65.322	46.028
701.66	60.017	65.441	43.779	70.119	58.622	78.575	59.269	76.007	44.928	71.995	67.515	54.11	55.406	62.518	71.216	73.529	55.816	38.691	60.53	71.231	56	81.406	44.428	59.187	47.771	70.276	46.041	72.935	46.026	67.593	55.742	69.825	47.329	65.728	61.219	85.03	68.276	52.738	59.221	71.83	63.054	70.124	56.949	50.69	60.066	66.742	66.546	65.349	46.106
702.07	59.984	65.415	43.824	70.067	58.615	78.565	59.248	75.955	44.991	71.938	67.487	54.174	55.482	62.546	71.229	73.454	55.79	38.671	60.579	71.259	55.955	81.322	44.469	59.154	47.744	70.243	46.018	72.849	46.094	67.647	55.717	69.845	47.34	65.751	61.251	85.056	68.305	52.785	59.221	71.828	63.145	70.096	56.954	50.732	60.051	66.716	66.555	65.269	46.126
702.48	59.97	65.455	43.86	70.082	58.67	78.562	59.335	76	45.004	71.974	67.586	54.165	55.719	62.593	71.324	73.504	55.78	38.686	60.676	71.224	56.079	81.28	44.477	59.136	47.801	70.319	46.084	72.868	46.073	67.672	55.768	69.905	47.36	65.803	61.323	85.135	68.372	52.835	59.246	71.834	63.197	70.138	56.99	50.802	60.06	66.799	66.601	65.31	46.161
702.89	59.983	65.562	43.901	70.163	58.736	78.665	59.376	76.097	45.05	71.981	67.674	54.186	55.758	62.532	71.379	73.58	55.834	38.712	60.74	71.279	56.128	81.403	44.601	59.222	47.856	70.393	46.125	72.993	46.165	67.757	55.872	69.989	47.39	65.899	61.397	85.297	68.422	52.881	59.351	71.856	63.265	70.224	57.066	50.889	60.145	66.872	66.633	65.32	46.247
703.3	60.043	65.472	43.807	70.095	58.699	78.547	59.342	76.092	45.109	71.867	67.712	54.164	55.835	62.57	71.341	73.447	55.874	38.664	60.745	71.241	56.065	81.322	44.6	59.166	47.822	70.235	46.109	73.011	46.147	67.73	55.904	70.016	47.374	65.944	61.464	85.37	68.441	52.924	59.325	71.853	63.342	70.303	57.153	50.916	60.173	66.855	66.66	65.43	46.301
703.71	60.079	65.373	43.757	69.995	58.672	78.52	59.384	76.047	45.069	71.894	67.75	54.135	55.943	62.542	71.222	73.458	55.906	38.594	60.775	71.194	55.958	81.26	44.519	59.162	47.799	70.203	46.058	72.902	46.09	67.739	55.982	70.075	47.373	66.018	61.552	85.431	68.48	52.941	59.412	71.943	63.371	70.439	57.225	50.95	60.258	66.926	66.719	65.471	46.331
704.12	60.162	65.408	43.802	69.989	58.643	78.516	59.45	76.078	45.143	71.862	67.711	54.232	56.105	62.502	71.299	73.454	55.908	38.56	60.793	71.232	55.938	81.24	44.583	59.069	47.855	70.193	46.054	72.935	46.139	67.741	56.068	70.118	47.423	66.083	61.611	85.437	68.511	53.014	59.433	71.979	63.435	70.546	57.254	51.026	60.338	67.004	66.752	65.434	46.36
704.53	60.233	65.422	43.854	70.017	58.745	78.587	59.423	76.141	45.099	71.946	67.785	54.256	56.148	62.505	71.312	73.443	56.021	38.618	60.883	71.249	56.071	81.227	44.624	59.12	47.939	70.249	46.107	73.083	46.135	67.776	56.103	70.112	47.46	66.176	61.648	85.459	68.571	53.042	59.494	72.038	63.499	70.572	57.269	51.045	60.373	67.071	66.838	65.516	46.404
704.94	60.351	65.46	43.808	69.932	58.827	78.529	59.485	76.231	45.129	72.011	67.925	54.367	56.35	62.596	71.408	73.528	56.026	38.612	60.91	71.252	56.199	81.225	44.622	59.137	47.993	70.327	46.084	73.123	46.174	67.739	56.08	70.149	47.505	66.273	61.679	85.46	68.577	53.099	59.538	72.106	63.53	70.637	57.288	51.058	60.38	67.081	66.884	65.537	46.447
705.34	60.368	65.447	43.873	69.958	58.834	78.589	59.56	76.27	45.154	71.995	67.973	54.389	56.464	62.628	71.456	73.489	56.058	38.606	60.937	71.174	56.302	81.252	44.64	59.04	48.057	70.369	46.268	73.102	46.171	67.756	56.048	70.133	47.486	66.366	61.703	85.511	68.597	53.138	59.587	72.079	63.582	70.691	57.373	51.091	60.383	67.072	66.936	65.541	46.487
705.75	60.349	65.433	43.893	69.986	58.939	78.585	59.538	76.305	45.158	71.89	68.086	54.445	56.569	62.663	71.474	73.452	56.064	38.555	60.954	71.199	56.345	81.182	44.667	59.05	48.069	70.36	46.327	73.126	46.248	67.812	56.056	70.2	47.496	66.371	61.74	85.485	68.562	53.134	59.599	72.143	63.614	70.687	57.447	51.067	60.438	67.102	66.951	65.57	46.516
706.16	60.298	65.428	43.949	69.919	58.968	78.581	59.565	76.311	45.234	71.826	68.06	54.465	56.607	62.563	71.399	73.473	56.013	38.617	60.969	71.158	56.392	81.196	44.716	59.005	48.213	70.371	46.326	73.162	46.332	67.782	56.064	70.211	47.489	66.425	61.757	85.506	68.622	53.221	59.596	72.203	63.646	70.664	57.481	51.016	60.465	67.196	66.941	65.565	46.555
706.57	60.341	65.463	43.915	69.869	58.855	78.572	59.57	76.239	45.173	71.726	68.029	54.405	56.63	62.616	71.427	73.506	55.999	38.614	60.926	71.057	56.384	81.081	44.691	59.015	48.255	70.362	46.288	73.023	46.358	67.681	56.127	70.264	47.508	66.538	61.832	85.589	68.693	53.268	59.627	72.269	63.746	70.683	57.575	51.106	60.493	67.235	66.974	65.607	46.571
706.98	60.379	65.601	43.955	69.907	58.939	78.521	59.559	76.284	45.149	71.728	67.998	54.417	56.798	62.673	71.45	73.652	56.058	38.625	60.891	71.038	56.315	81.092	44.716	58.992	48.291	70.345	46.293	73.06	46.419	67.745	56.092	70.201	47.523	66.563	61.822	85.551	68.709	53.265	59.631	72.329	63.711	70.7	57.611	51.137	60.509	67.282	66.988	65.629	46.61
707.39	60.379	65.588	43.848	69.843	58.901	78.411	59.543	76.187	45.245	71.635	67.951	54.28	56.788	62.553	71.283	73.531	56.061	38.544	60.813	70.971	56.284	81.061	44.677	58.914	48.22	70.231	46.19	73.022	46.413	67.528	56.074	70.224	47.48	66.557	61.831	85.565	68.72	53.24	59.624	72.318	63.706	70.675	57.639	51.097	60.468	67.26	66.955	65.614	46.603
707.79	60.343	65.519	43.822	69.827	58.927	78.35	59.581	76.184	45.332	71.669	67.917	54.28	56.838	62.529	71.244	73.434	56.051	38.554	60.788	70.926	56.332	81.009	44.623	58.876	48.177	70.219	46.165	72.921	46.483	67.524	56.077	70.322	47.548	66.691	61.9	85.615	68.781	53.333	59.753	72.347	63.818	70.744	57.799	51.14	60.525	67.365	67.048	65.682	46.665
708.2	60.445	65.539	43.767	69.84	59.007	78.354	59.611	76.127	45.381	71.669	67.989	54.285	56.809	62.546	71.174	73.433	56.105	38.574	60.797	71.004	56.353	80.923	44.621	58.819	48.131	70.232	46.172	73.016	46.444	67.494	56.097	70.32	47.576	66.716	61.936	85.587	68.823	53.331	59.816	72.333	63.869	70.763	57.795	51.156	60.56	67.388	67.078	65.727	46.624
708.61	60.375	65.573	43.727	69.801	58.887	78.368	59.585	76.166	45.327	71.724	67.988	54.203	56.848	62.505	71.105	73.452	56.088	38.525	60.707	70.957	56.393	80.839	44.593	58.764	48.06	70.214	46.225	72.976	46.447	67.549	56.111	70.335	47.587	66.703	61.882	85.658	68.824	53.33	59.819	72.372	63.936	70.752	57.814	51.122	60.542	67.317	67.068	65.713	46.639
709.02	60.38	65.59	43.723	69.748	58.935	78.411	59.63	76.177	45.364	71.772	68.007	54.189	56.915	62.503	71.096	73.452	56.09	38.484	60.762	70.958	56.419	80.866	44.604	58.793	48.058	70.253	46.202	72.944	46.46	67.495	56.167	70.348	47.594	66.79	61.928	85.746	68.9	53.363	59.877	72.463	63.928	70.762	57.863	51.227	60.639	67.377	67.123	65.842	46.669
709.43	60.384	65.54	43.712	69.617	58.949	78.273	59.589	76.177	45.323	71.725	67.933	54.181	56.96	62.524	71.074	73.354	56.019	38.458	60.686	70.93	56.424	80.789	44.594	58.758	48.013	70.162	46.109	72.971	46.462	67.44	56.116	70.307	47.549	66.79	61.864	85.713	68.81	53.336	59.844	72.45	63.927	70.736	57.853	51.26	60.602	67.358	67.122	65.818	46.664
709.83	60.462	65.552	43.789	69.681	59.006	78.302	59.772	76.227	45.297	71.849	67.979	54.195	57.059	62.55	71.054	73.368	56.084	38.484	60.719	70.968	56.498	80.853	44.576	58.826	48.05	70.105	46.082	72.937	46.513	67.511	56.196	70.394	47.533	66.84	61.861	85.718	68.805	53.379	59.904	72.482	63.922	70.782	57.91	51.286	60.635	67.404	67.167	65.88	46.689
710.24	60.476	65.557	43.798	69.73	58.974	78.332	59.761	76.216	45.322	71.858	67.914	54.233	57.059	62.547	71.119	73.36	56.133	38.467	60.721	70.955	56.512	80.812	44.641	58.815	48.005	70.113	46.02	72.871	46.548	67.508	56.119	70.349	47.509	66.866	61.741	85.644	68.751	53.342	59.841	72.462	63.871	70.758	57.922	51.241	60.59	67.369	67.105	65.852	46.649
710.65	60.537	65.489	43.808	69.628	58.985	78.292	59.85	76.169	45.301	72.007	67.864	54.27	57.129	62.518	71.078	73.249	56.079	38.47	60.681	70.985	56.546	80.69	44.664	58.804	48.017	70.092	46.002	72.875	46.473	67.501	56.047	70.243	47.44	66.82	61.661	85.514	68.718	53.317	59.682	72.388	63.86	70.748	57.87	51.203	60.434	67.285	67.106	65.772	46.602
711.06	60.558	65.518	43.934	69.679	59.067	78.354	59.934	76.248	45.264	72.096	67.855	54.422	57.257	62.532	71.067	73.374	56.119	38.55	60.795	71.009	56.633	80.807	44.689	58.883	48.027	70.286	46.018	72.937	46.542	67.581	56.009	70.257	47.472	66.863	61.685	85.565	68.746	53.292	59.724	72.371	63.827	70.742	57.855	51.228	60.361	67.342	67.107	65.772	46.587
711.47	60.541	65.53	43.975	69.719	59.02	78.34	59.894	76.213	45.318	72.078	67.907	54.395	57.354	62.482	71.103	73.305	56.119	38.63	60.783	70.963	56.697	80.737	44.809	58.709	48.046	70.324	46.082	72.965	46.593	67.462	55.974	70.256	47.502	66.832	61.658	85.542	68.732	53.319	59.748	72.338	63.865	70.732	57.917	51.25	60.284	67.367	67.095	65.796	46.613
711.87	60.534	65.516	44.002	69.794	59.102	78.474	59.929	76.287	45.348	72.057	67.956	54.444	57.42	62.569	71.172	73.485	56.196	38.688	60.851	70.985	56.768	80.87	44.836	58.888	48.132	70.335	46.112	72.966	46.599	67.45	55.934	70.277	47.493	66.846	61.57	85.5	68.699	53.267	59.783	72.277	63.852	70.689	57.928	51.239	60.225	67.38	67.112	65.82	46.645
712.28	60.584	65.515	44.004	69.793	59.156	78.425	60.004	76.286	45.451	72.053	68.008	54.492	57.56	62.642	71.211	73.653	56.197	38.671	60.825	71.05	56.817	80.982	44.802	58.934	48.148	70.359	46.05	72.956	46.662	67.528	55.95	70.293	47.483	66.864	61.528	85.52	68.686	53.234	59.744	72.182	63.842	70.653	57.918	51.241	60.203	67.381	67.117	65.806	46.658
712.69	60.44	65.454	43.976	69.737	59.095	78.415	59.984	76.226	45.373	71.962	67.866	54.422	57.483	62.517	71.085	73.55	56.078	38.676	60.715	70.993	56.713	80.92	44.796	58.911	48.161	70.233	46.058	72.911	46.672	67.467	55.945	70.261	47.491	66.88	61.512	85.599	68.71	53.217	59.713	72.188	63.878	70.653	57.937	51.32	60.181	67.342	67.128	65.814	46.683
713.1	60.53	65.552	44.036	69.852	59.205	78.436	60.064	76.194	45.409	71.966	67.905	54.459	57.555	62.538	71.116	73.644	56.114	38.786	60.736	71.088	56.778	80.899	44.876	59.015	48.219	70.263	46.026	72.984	46.82	67.502	55.953	70.325	47.468	66.946	61.5	85.67	68.692	53.22	59.777	72.207	63.839	70.586	57.955	51.342	60.177	67.366	67.12	65.832	46.693
713.5	60.501	65.526	44.095	69.91	59.206	78.363	60.172	76.179	45.426	71.964	67.912	54.445	57.578	62.561	71.028	73.646	56.11	38.813	60.695	71.118	56.731	80.905	44.914	58.989	48.229	70.259	45.972	72.968	46.843	67.478	55.996	70.237	47.415	67.031	61.468	85.695	68.748	53.216	59.752	72.166	63.844	70.532	57.926	51.361	60.171	67.425	67.12	65.805	46.703
713.91	60.697	65.647	44.168	69.949	59.281	78.48	60.244	76.179	45.46	72.056	67.927	54.456	57.539	62.616	71.17	73.678	56.107	38.737	60.671	71.085	56.826	80.939	44.959	59.096	48.206	70.324	46.016	72.908	46.864	67.513	55.996	70.263	47.432	67.019	61.439	85.658	68.73	53.177	59.756	72.133	63.86	70.52	57.924	51.381	60.122	67.417	67.139	65.812	46.649
714.32	60.659	65.594	44.172	69.973	59.27	78.505	60.231	76.204	45.53	72.102	67.851	54.551	57.54	62.517	71.155	73.672	56.049	38.643	60.701	71.181	56.853	81.085	44.953	59.024	48.215	70.355	46.022	73.031	46.846	67.586	56.005	70.289	47.413	67.012	61.452	85.639	68.64	53.218	59.71	72.152	63.84	70.538	57.875	51.371	60.152	67.448	67.15	65.837	46.675
714.73	60.692	65.516	44.244	69.963	59.32	78.592	60.292	76.309	45.596	72.086	67.955	54.619	57.571	62.5	71.209	73.692	56.032	38.645	60.772	71.319	56.883	81.218	44.998	59.061	48.264	70.522	46.061	73.05	46.887	67.517	55.992	70.27	47.4	66.98	61.449	85.607	68.594	53.229	59.654	72.073	63.867	70.48	57.862	51.304	60.161	67.432	67.138	65.771	46.613
715.13	60.617	65.39	44.213	69.823	59.223	78.669	60.249	76.283	45.434	71.953	67.911	54.652	57.456	62.371	71.22	73.565	56.017	38.618	60.75	71.234	56.775	81.098	45.014	58.99	48.217	70.484	45.974	73.026	46.831	67.625	56.04	70.249	47.43	67.028	61.472	85.572	68.571	53.281	59.716	72.144	63.927	70.481	57.912	51.334	60.202	67.466	67.089	65.748	46.62
715.54	60.613	65.346	44.166	69.738	59.146	78.68	60.208	76.285	45.312	71.91	67.921	54.57	57.502	62.256	71.163	73.535	55.936	38.621	60.777	71.3	56.611	81.061	45.096	59.069	48.206	70.45	45.921	72.961	46.74	67.562	56.038	70.176	47.354	66.992	61.423	85.498	68.561	53.202	59.59	72.108	63.841	70.409	57.84	51.314	60.163	67.377	67.044	65.647	46.541
715.95	60.599	65.275	44.113	69.741	59.118	78.692	60.197	76.273	45.244	71.933	68.01	54.577	57.573	62.243	71.129	73.536	55.932	38.661	60.845	71.335	56.664	81.095	45.16	59.029	48.164	70.587	45.875	72.901	46.748	67.569	56.02	70.141	47.307	67.035	61.381	85.505	68.423	53.222	59.536	72.138	63.801	70.376	57.848	51.288	60.137	67.357	66.917	65.602	46.604
716.36	60.594	65.251	44.16	69.774	59.2	78.771	60.178	76.374	45.203	72.006	68.068	54.575	57.642	62.313	71.144	73.61	55.973	38.728	60.916	71.432	56.674	81.12	45.172	59.028	48.195	70.595	45.831	72.976	46.717	67.472	55.967	70.122	47.256	67.118	61.419	85.444	68.438	53.234	59.533	72.095	63.78	70.378	57.852	51.312	60.158	67.377	66.931	65.592	46.563
716.76	60.605	65.196	44.243	69.808	59.115	78.791	60.222	76.48	45.246	71.955	68.027	54.528	57.666	62.302	71.132	73.562	55.999	38.806	60.868	71.359	56.649	81.15	45.132	58.937	48.181	70.546	45.793	73.019	46.673	67.531	55.923	70.12	47.269	67.118	61.446	85.391	68.368	53.198	59.545	72.026	63.73	70.358	57.796	51.194	60.126	67.378	66.934	65.536	46.52
717.17	60.633	65.184	44.274	69.891	59.058	78.803	60.222	76.514	45.243	71.956	68.038	54.612	57.686	62.265	71.139	73.627	55.966	38.775	60.969	71.259	56.661	81.195	45.138	58.964	48.184	70.543	45.819	73.016	46.701	67.525	55.997	70.154	47.342	67.141	61.514	85.456	68.407	53.226	59.577	72.082	63.816	70.43	57.851	51.209	60.167	67.477	66.995	65.581	46.512
717.58	60.632	65.217	44.226	69.877	58.98	78.907	60.16	76.507	45.242	71.893	68.074	54.573	57.745	62.313	71.148	73.67	55.884	38.798	60.977	71.302	56.697	81.186	45.102	58.941	48.186	70.602	45.843	73.081	46.658	67.432	55.903	70.058	47.34	67.154	61.489	85.488	68.41	53.197	59.549	72.043	63.802	70.417	57.841	51.217	60.159	67.508	66.974	65.56	46.481
717.98	60.748	65.221	44.19	69.88	58.976	78.912	60.199	76.522	45.281	71.926	68.149	54.554	57.792	62.335	71.073	73.676	55.9	38.784	61.024	71.391	56.709	81.23	45.091	58.984	48.279	70.586	45.877	73.136	46.772	67.502	55.894	70.07	47.338	67.174	61.52	85.442	68.404	53.202	59.589	71.999	63.818	70.387	57.833	51.223	60.115	67.453	66.951	65.524	46.508
718.39	60.634	65.214	44.23	69.901	58.943	78.898	60.133	76.447	45.313	71.829	68.13	54.459	57.783	62.284	71.043	73.7	55.859	38.718	60.973	71.345	56.676	81.323	44.988	58.943	48.22	70.455	45.905	73.079	46.715	67.457	55.96	70.18	47.413	67.253	61.565	85.545	68.439	53.23	59.659	72.069	63.86	70.394	57.879	51.266	60.234	67.536	66.98	65.588	46.511
718.8	60.538	65.137	44.144	69.797	58.882	78.809	60.042	76.292	45.336	71.771	68.061	54.288	57.739	62.22	71.055	73.63	55.786	38.657	60.895	71.275	56.617	81.165	44.985	58.838	48.281	70.286	45.863	73.016	46.642	67.369	55.973	70.161	47.38	67.311	61.499	85.557	68.432	53.24	59.677	72.093	63.87	70.384	57.885	51.223	60.286	67.522	66.962	65.526	46.439
719.2	60.479	65.139	44.131	69.758	58.895	78.786	60.07	76.265	45.334	71.761	68.032	54.326	57.722	62.262	71.097	73.733	55.767	38.677	60.85	71.288	56.631	81.21	44.936	59.002	48.337	70.272	45.821	72.993	46.704	67.412	55.99	70.153	47.349	67.348	61.515	85.621	68.507	53.202	59.594	72.077	63.855	70.367	57.89	51.22	60.316	67.537	66.965	65.529	46.427
719.61	60.431	64.997	44.015	69.617	58.798	78.665	59.931	76.229	45.204	71.685	68.031	54.099	57.571	62.181	70.855	73.533	55.63	38.59	60.76	71.113	56.542	80.963	44.838	58.87	48.106	70.146	45.658	72.836	46.719	67.414	55.993	70.119	47.362	67.423	61.574	85.68	68.565	53.286	59.643	72.134	63.874	70.463	57.902	51.229	60.377	67.572	66.977	65.542	46.416
720.02	60.41	65.028	44.019	69.537	58.652	78.724	59.876	76.16	45.109	71.653	67.982	53.988	57.48	62.086	70.847	73.449	55.559	38.604	60.709	70.948	56.45	80.858	44.825	58.832	48.054	70.099	45.693	72.846	46.717	67.304	55.968	70.102	47.338	67.461	61.574	85.691	68.485	53.317	59.645	72.134	63.855	70.483	57.934	51.246	60.346	67.538	66.949	65.505	46.407
720.42	60.458	65.069	44.031	69.538	58.555	78.831	59.889	76.225	45.098	71.645	68.024	54.035	57.52	62.141	70.938	73.511	55.658	38.621	60.757	71.046	56.533	80.901	44.833	58.851	48.053	70.12	45.611	72.805	46.68	67.329	55.992	70.161	47.363	67.463	61.625	85.758	68.482	53.348	59.633	72.101	63.792	70.49	57.894	51.205	60.367	67.549	66.992	65.501	46.393
720.83	60.484	65.008	43.96	69.415	58.524	78.822	59.856	76.224	45.149	71.665	68.014	54.075	57.492	62.034	70.923	73.472	55.622	38.525	60.853	70.936	56.435	80.856	44.862	58.846	48.076	70.107	45.609	72.751	46.619	67.279	56.019	70.16	47.429	67.43	61.658	85.695	68.418	53.338	59.607	72.102	63.818	70.469	57.89	51.216	60.395	67.565	67.025	65.495	46.378
721.24	60.503	65.046	43.904	69.367	58.575	78.841	59.782	76.246	45.141	71.76	68.025	54.083	57.547	62.043	71.099	73.532	55.667	38.495	60.828	70.953	56.507	80.846	44.758	58.89	48.146	70.112	45.632	72.833	46.565	67.332	55.997	70.215	47.46	67.422	61.685	85.723	68.41	53.344	59.653	72.141	63.875	70.486	57.914	51.326	60.391	67.565	67.035	65.562	46.364
721.64	60.388	64.881	43.787	69.234	58.45	78.68	59.668	76.258	45.011	71.701	67.99	54.039	57.652	62.011	71.047	73.532	55.627	38.504	60.775	71.048	56.37	80.688	44.714	58.696	48.041	69.953	45.521	72.767	46.482	67.247	55.952	70.191	47.466	67.413	61.627	85.753	68.361	53.35	59.641	72.141	63.88	70.472	57.845	51.323	60.408	67.471	67.018	65.509	46.374
722.05	60.303	64.82	43.819	69.167	58.472	78.655	59.625	76.177	44.987	71.698	68.09	54.017	57.667	62.032	71.03	73.522	55.693	38.508	60.704	71.039	56.362	80.539	44.688	58.687	48.014	69.96	45.517	72.707	46.536	67.211	55.993	70.171	47.474	67.473	61.612	85.728	68.399	53.377	59.697	72.109	63.854	70.412	57.859	51.333	60.365	67.492	67.061	65.498	46.342
722.46	60.341	64.875	43.893	69.22	58.468	78.775	59.642	76.072	44.997	71.745	68.054	53.972	57.686	61.99	71.037	73.55	55.719	38.546	60.749	70.869	56.374	80.489	44.649	58.714	48.031	69.84	45.537	72.649	46.593	67.287	56.001	70.209	47.507	67.451	61.609	85.742	68.464	53.311	59.776	72.113	63.894	70.444	57.937	51.385	60.321	67.467	67.046	65.571	46.438
722.86	60.334	64.998	43.956	69.21	58.458	78.691	59.646	76.044	45.023	71.858	68.16	53.985	57.722	62.049	71.025	73.611	55.704	38.521	60.72	70.926	56.449	80.456	44.569	58.726	48.088	69.801	45.603	72.664	46.65	67.261	55.956	70.242	47.547	67.483	61.553	85.742	68.486	53.273	59.777	72.092	63.886	70.464	57.894	51.449	60.332	67.483	67.113	65.587	46.464
723.27	60.366	65.038	43.938	69.245	58.555	78.667	59.629	76.065	45.067	71.852	68.128	54.033	57.716	62.148	71.055	73.582	55.73	38.53	60.638	70.928	56.519	80.509	44.444	58.588	48.14	69.761	45.644	72.8	46.687	67.279	55.978	70.177	47.516	67.472	61.52	85.712	68.447	53.246	59.804	72.091	63.889	70.47	57.842	51.42	60.347	67.527	67.063	65.544	46.489
723.67	60.384	65.083	44.068	69.221	58.621	78.64	59.628	76.116	45.107	71.793	68.115	54.006	57.733	62.214	71.037	73.571	55.651	38.524	60.608	70.921	56.569	80.599	44.425	58.654	48.172	69.64	45.663	72.823	46.727	67.278	56.024	70.239	47.576	67.416	61.569	85.804	68.528	53.248	59.843	72.154	63.875	70.49	57.883	51.478	60.382	67.563	67.131	65.564	46.506
724.08	60.41	65.149	44.052	69.203	58.597	78.577	59.678	76.08	45.242	71.784	68.1	54.067	57.786	62.164	71.192	73.542	55.718	38.472	60.619	70.812	56.625	80.644	44.46	58.681	48.231	69.615	45.689	72.772	46.769	67.342	56.048	70.225	47.616	67.417	61.581	85.821	68.496	53.283	59.856	72.223	63.903	70.499	57.924	51.51	60.389	67.57	67.155	65.576	46.559
724.49	60.36	65.09	43.888	69.181	58.609	78.455	59.607	75.967	45.145	71.812	67.972	54.104	57.684	62.055	71.133	73.456	55.661	38.419	60.524	70.866	56.559	80.477	44.472	58.72	48.26	69.586	45.755	72.705	46.763	67.245	56.076	70.276	47.608	67.449	61.553	85.863	68.507	53.316	59.876	72.254	63.997	70.504	57.981	51.546	60.373	67.581	67.02	65.578	46.584
724.89	60.341	65.091	43.862	69.184	58.696	78.519	59.598	75.902	45.198	71.715	67.951	53.992	57.681	62.062	71.166	73.427	55.72	38.382	60.413	70.996	56.532	80.439	44.449	58.71	48.267	69.57	45.736	72.621	46.724	67.286	56.069	70.332	47.595	67.55	61.581	85.838	68.568	53.343	59.932	72.303	63.982	70.554	58.057	51.54	60.409	67.563	67.024	65.613	46.61
725.3	60.312	65.025	43.878	69.228	58.749	78.53	59.645	75.972	45.285	71.742	67.969	54.06	57.69	62.04	71.17	73.412	55.741	38.411	60.318	70.922	56.504	80.419	44.521	58.781	48.273	69.562	45.79	72.587	46.769	67.38	56.11	70.331	47.62	67.5	61.58	85.76	68.546	53.32	59.91	72.307	63.933	70.539	57.99	51.479	60.38	67.516	67.042	65.548	46.647
725.7	60.277	65.072	43.938	69.182	58.842	78.551	59.734	75.989	45.265	71.763	67.992	54.088	57.711	62.106	71.178	73.509	55.806	38.415	60.23	70.778	56.512	80.517	44.46	58.865	48.249	69.518	45.729	72.546	46.742	67.313	56.15	70.265	47.564	67.44	61.527	85.719	68.512	53.349	59.821	72.301	63.885	70.586	57.965	51.423	60.368	67.515	67.01	65.493	46.599
726.11	60.407	65.13	43.938	69.317	58.902	78.545	59.733	76.009	45.252	71.787	68.068	54.124	57.796	62.225	71.259	73.588	55.838	38.408	60.277	70.799	56.614	80.587	44.54	58.886	48.216	69.682	45.683	72.512	46.883	67.355	56.175	70.274	47.548	67.449	61.571	85.649	68.527	53.365	59.844	72.296	63.877	70.592	58.01	51.402	60.33	67.524	66.967	65.476	46.592
726.52	60.408	65.125	43.956	69.496	58.893	78.574	59.692	76.034	45.283	71.798	68.159	54.252	57.791	62.297	71.299	73.627	55.884	38.43	60.268	70.924	56.662	80.673	44.534	58.959	48.183	69.675	45.653	72.566	46.927	67.408	56.193	70.297	47.58	67.503	61.613	85.656	68.555	53.394	59.853	72.348	63.901	70.568	58.028	51.439	60.36	67.571	67.022	65.54	46.67
726.92	60.401	65.089	43.914	69.453	58.857	78.546	59.673	76.056	45.303	71.78	68.166	54.197	57.71	62.26	71.251	73.524	55.849	38.366	60.283	70.934	56.621	80.705	44.535	58.84	48.146	69.658	45.543	72.463	46.82	67.452	56.207	70.337	47.629	67.604	61.575	85.616	68.547	53.389	59.9	72.392	63.9	70.617	58.025	51.45	60.405	67.515	67.058	65.537	46.703
727.33	60.381	65.196	43.926	69.611	58.835	78.472	59.66	76.081	45.386	71.793	68.084	54.308	57.818	62.283	71.35	73.588	55.899	38.372	60.181	70.93	56.662	80.788	44.549	58.794	48.273	69.656	45.612	72.509	46.853	67.439	56.207	70.357	47.612	67.555	61.536	85.579	68.544	53.362	59.89	72.359	63.899	70.516	58.086	51.443	60.422	67.383	66.98	65.5	46.689
727.73	60.383	65.232	43.982	69.756	58.979	78.484	59.706	76.098	45.49	71.77	68.16	54.414	57.874	62.271	71.405	73.589	56.013	38.446	60.267	71.049	56.764	80.875	44.563	58.867	48.301	69.668	45.675	72.474	46.873	67.534	56.202	70.314	47.606	67.493	61.557	85.537	68.579	53.402	59.893	72.417	63.912	70.475	58.136	51.4	60.44	67.452	66.996	65.441	46.689
728.14	60.431	65.231	44.083	69.759	59.116	78.401	59.649	76.037	45.566	71.791	68.2	54.36	57.921	62.283	71.313	73.551	56.001	38.423	60.24	71.053	56.769	80.892	44.565	58.848	48.349	69.673	45.815	72.529	46.913	67.521	56.248	70.351	47.619	67.515	61.546	85.476	68.576	53.389	59.917	72.417	63.973	70.474	58.178	51.409	60.442	67.455	66.936	65.401	46.687
728.54	60.352	65.313	44.079	69.745	59.046	78.403	59.624	75.971	45.523	71.708	68.158	54.27	57.945	62.354	71.261	73.491	55.926	38.445	59.995	71.097	56.763	80.94	44.458	58.849	48.317	69.635	45.836	72.435	46.897	67.572	56.226	70.404	47.564	67.559	61.504	85.506	68.626	53.384	59.902	72.447	64.006	70.533	58.238	51.438	60.451	67.479	66.956	65.396	46.711
728.95	60.446	65.342	44.119	69.784	59.134	78.511	59.729	76.056	45.584	71.744	68.194	54.316	57.927	62.401	71.26	73.515	55.891	38.606	60.08	71.12	56.729	81.014	44.541	58.906	48.331	69.649	45.843	72.431	46.941	67.668	56.191	70.333	47.551	67.535	61.52	85.421	68.61	53.4	59.865	72.334	63.957	70.52	58.236	51.358	60.394	67.474	66.899	65.288	46.698
729.35	60.391	65.332	44.148	69.874	59.178	78.505	59.784	76.081	45.586	71.691	68.189	54.282	57.908	62.381	71.233	73.514	55.945	38.611	60.118	71.05	56.732	81.131	44.512	58.943	48.385	69.707	45.893	72.384	46.937	67.634	56.276	70.337	47.537	67.614	61.603	85.362	68.615	53.39	59.917	72.332	63.955	70.515	58.293	51.395	60.408	67.536	66.936	65.294	46.753
729.76	60.53	65.459	44.146	69.933	59.213	78.509	59.825	76.125	45.572	71.592	68.158	54.245	57.984	62.47	71.261	73.564	55.858	38.699	60.192	70.997	56.746	81.199	44.556	59.003	48.367	69.681	45.905	72.403	46.891	67.592	56.249	70.344	47.556	67.614	61.642	85.413	68.696	53.394	59.965	72.401	64.007	70.64	58.411	51.374	60.442	67.563	66.979	65.296	46.839
730.16	60.423	65.446	44.023	69.922	59.124	78.392	59.804	76.16	45.533	71.559	68.193	54.213	58.022	62.535	71.307	73.445	55.882	38.713	60.133	71.116	56.8	81.166	44.584	58.942	48.36	69.705	45.861	72.398	46.824	67.619	56.256	70.382	47.573	67.731	61.708	85.462	68.729	53.463	60.011	72.455	63.996	70.669	58.389	51.405	60.473	67.596	67.031	65.268	46.771
730.57	60.436	65.414	44.043	70.036	59.197	78.511	59.885	76.208	45.536	71.502	68.183	54.25	58.082	62.667	71.388	73.439	55.908	38.75	60.198	71.176	56.847	81.167	44.651	59.034	48.37	69.783	45.898	72.317	46.855	67.607	56.196	70.342	47.535	67.727	61.687	85.446	68.694	53.498	59.962	72.455	64.034	70.615	58.466	51.352	60.437	67.598	67.019	65.222	46.73
730.97	60.434	65.455	44.109	70.111	59.193	78.604	59.901	76.235	45.561	71.455	68.292	54.293	58.193	62.714	71.404	73.512	55.892	38.799	60.251	71.173	56.815	81.177	44.774	59.08	48.369	69.808	45.935	72.321	46.792	67.619	56.231	70.378	47.604	67.718	61.723	85.446	68.658	53.522	59.993	72.46	63.995	70.625	58.556	51.4	60.427	67.616	67.039	65.27	46.776
731.38	60.407	65.545	44.066	70.056	59.228	78.635	59.9	76.345	45.604	71.488	68.299	54.315	58.232	62.744	71.559	73.587	55.94	38.772	60.226	71.161	56.863	81.143	44.799	59.08	48.372	69.878	45.959	72.404	46.806	67.709	56.21	70.414	47.542	67.753	61.692	85.356	68.639	53.501	59.993	72.399	64.018	70.629	58.522	51.363	60.411	67.616	67.066	65.234	46.758
731.78	60.437	65.504	44.068	70.012	59.221	78.612	59.907	76.367	45.593	71.444	68.345	54.256	58.153	62.811	71.39	73.534	55.891	38.821	60.181	71.151	56.749	81.107	44.779	59.064	48.291	69.857	45.854	72.426	46.845	67.599	56.156	70.435	47.528	67.787	61.638	85.341	68.617	53.468	59.974	72.355	64.013	70.61	58.519	51.328	60.393	67.648	67.057	65.252	46.718
732.19	60.391	65.537	44.121	69.928	59.234	78.607	59.827	76.294	45.577	71.425	68.51	54.209	58.241	62.883	71.445	73.542	55.903	38.732	60.19	71.204	56.782	81.161	44.746	59.048	48.239	69.855	45.77	72.417	46.829	67.555	56.174	70.379	47.5	67.809	61.635	85.296	68.612	53.49	59.975	72.409	63.893	70.588	58.534	51.28	60.371	67.607	67.125	65.254	46.757
732.59	60.442	65.615	44.151	69.997	59.206	78.608	59.85	76.47	45.551	71.519	68.643	54.236	58.298	62.937	71.527	73.651	55.935	38.813	60.29	71.242	56.864	81.171	44.84	59.155	48.339	69.969	45.832	72.513	46.944	67.533	56.225	70.388	47.484	67.805	61.604	85.332	68.602	53.472	59.953	72.372	63.86	70.539	58.491	51.288	60.321	67.588	67.139	65.16	46.744
733	60.407	65.58	44.06	69.894	59.108	78.486	59.664	76.284	45.458	71.439	68.547	54.187	58.189	62.825	71.475	73.552	55.823	38.699	60.354	71.213	56.718	81.13	44.807	58.992	48.287	69.828	45.732	72.395	46.93	67.433	56.22	70.36	47.439	67.855	61.616	85.3	68.591	53.521	59.967	72.338	63.896	70.503	58.575	51.291	60.329	67.628	67.086	65.197	46.702
733.4	60.352	65.513	44.024	69.823	58.959	78.446	59.516	76.186	45.397	71.344	68.514	54.158	58.071	62.601	71.51	73.406	55.622	38.636	60.322	71.228	56.76	80.976	44.851	58.862	48.263	69.788	45.742	72.38	46.829	67.366	56.225	70.441	47.531	67.953	61.691	85.383	68.635	53.54	60.075	72.405	63.952	70.493	58.607	51.319	60.389	67.705	67.162	65.248	46.754
733.81	60.311	65.435	43.975	69.685	58.894	78.355	59.525	76.265	45.392	71.331	68.502	54.198	58.019	62.58	71.353	73.3	55.617	38.632	60.282	71.256	56.709	80.844	44.825	58.847	48.322	69.652	45.801	72.39	46.792	67.35	56.271	70.457	47.563	68.029	61.667	85.401	68.616	53.574	60.116	72.38	64.02	70.46	58.603	51.324	60.419	67.74	67.233	65.262	46.792
734.21	60.428	65.518	44.013	69.556	58.932	78.409	59.516	76.296	45.377	71.335	68.526	54.14	58.008	62.494	71.347	73.258	55.618	38.584	60.296	71.158	56.64	80.872	44.838	58.837	48.332	69.755	45.86	72.296	46.79	67.404	56.272	70.407	47.542	67.984	61.593	85.386	68.553	53.551	60.068	72.243	63.985	70.479	58.581	51.326	60.395	67.735	67.226	65.211	46.772
734.62	60.46	65.512	44.071	69.642	58.925	78.39	59.468	76.306	45.268	71.268	68.547	54.185	58.054	62.508	71.285	73.302	55.635	38.61	60.281	71.132	56.574	80.78	44.753	58.959	48.345	69.733	45.946	72.345	46.776	67.322	56.291	70.417	47.543	67.973	61.639	85.396	68.484	53.564	60.096	72.23	64.005	70.453	58.633	51.279	60.411	67.819	67.203	65.196	46.751
735.02	60.575	65.562	44.104	69.68	59.069	78.486	59.559	76.367	45.243	71.374	68.75	54.215	58.12	62.524	71.293	73.364	55.623	38.76	60.432	71.25	56.612	80.864	44.813	59.074	48.361	69.852	45.993	72.44	46.824	67.386	56.299	70.423	47.564	68.062	61.695	85.442	68.481	53.544	60.056	72.234	64.045	70.463	58.648	51.257	60.403	67.924	67.362	65.195	46.76
735.43	60.508	65.468	44.074	69.591	58.947	78.442	59.574	76.413	45.265	71.447	68.814	54.176	58.06	62.56	71.221	73.374	55.503	38.735	60.408	71.334	56.553	80.811	44.871	59.015	48.341	69.85	45.974	72.439	46.801	67.363	56.305	70.443	47.54	68.056	61.628	85.378	68.439	53.491	59.997	72.241	64.023	70.459	58.583	51.281	60.307	67.887	67.339	65.268	46.727
735.83	60.482	65.487	44.025	69.554	58.869	78.452	59.522	76.459	45.214	71.442	68.762	54.23	58.045	62.528	71.306	73.45	55.476	38.759	60.398	71.329	56.528	80.747	44.869	59.036	48.266	69.87	45.864	72.305	46.778	67.338	56.312	70.444	47.514	68.068	61.554	85.329	68.443	53.491	59.958	72.248	64	70.479	58.6	51.279	60.261	67.905	67.391	65.265	46.688
736.24	60.385	65.434	43.941	69.537	58.85	78.33	59.477	76.479	45.206	71.434	68.718	54.252	58.059	62.479	71.235	73.43	55.482	38.725	60.51	71.344	56.486	80.626	44.912	59.009	48.198	69.864	45.736	72.28	46.726	67.255	56.351	70.398	47.524	68.057	61.499	85.301	68.426	53.564	59.93	72.158	63.972	70.448	58.488	51.233	60.166	67.824	67.387	65.274	46.698
736.64	60.234	65.359	43.869	69.554	58.678	78.309	59.374	76.291	45.127	71.311	68.644	54.109	58.028	62.304	71.181	73.288	55.454	38.632	60.453	71.247	56.491	80.471	44.831	58.955	48.153	69.798	45.684	72.173	46.728	67.18	56.41	70.495	47.564	68.171	61.447	85.361	68.451	53.61	59.972	72.251	64.039	70.49	58.55	51.287	60.214	67.843	67.455	65.294	46.717
737.04	60.269	65.343	43.849	69.538	58.686	78.295	59.366	76.231	45.13	71.337	68.658	54.135	58.009	62.356	71.152	73.153	55.434	38.558	60.412	71.235	56.508	80.476	44.87	59.009	48.133	69.712	45.629	72.226	46.754	67.159	56.291	70.46	47.567	68.162	61.382	85.388	68.388	53.587	59.89	72.236	64.075	70.514	58.512	51.226	60.18	67.815	67.409	65.307	46.634
737.45	60.223	65.363	43.836	69.546	58.625	78.299	59.359	76.255	45.171	71.413	68.729	54.179	58.044	62.203	71.22	73.06	55.525	38.56	60.353	71.331	56.507	80.56	44.827	59.094	48.176	69.712	45.633	72.25	46.845	67.214	56.224	70.452	47.518	68.119	61.291	85.358	68.32	53.577	59.805	72.189	64.011	70.42	58.496	51.205	60.16	67.727	67.361	65.277	46.58
737.85	60.306	65.407	43.908	69.503	58.667	78.292	59.402	76.25	45.137	71.431	68.66	54.218	58.008	62.224	71.126	73.105	55.468	38.521	60.422	71.267	56.433	80.547	44.807	59.109	48.153	69.717	45.742	72.271	46.874	67.149	56.221	70.406	47.498	68.122	61.283	85.278	68.198	53.6	59.741	72.143	63.976	70.386	58.531	51.152	60.179	67.723	67.315	65.252	46.55
738.26	60.363	65.466	43.921	69.486	58.654	78.241	59.369	76.286	45.134	71.452	68.666	54.177	58.066	62.113	71.082	73.177	55.504	38.553	60.48	71.244	56.428	80.545	44.851	59.119	48.223	69.681	45.752	72.38	46.87	67.191	56.352	70.503	47.481	68.225	61.373	85.353	68.289	53.622	59.812	72.217	63.953	70.493	58.577	51.207	60.196	67.83	67.306	65.296	46.655
738.66	60.323	65.446	43.887	69.495	58.608	78.176	59.372	76.272	45.08	71.515	68.684	54.169	58.016	62.115	71.031	73.141	55.586	38.527	60.464	71.197	56.467	80.549	44.773	59.152	48.216	69.742	45.734	72.369	46.895	67.167	56.387	70.533	47.48	68.298	61.379	85.455	68.392	53.65	59.846	72.243	64.051	70.541	58.669	51.272	60.212	67.862	67.407	65.314	46.701
739.06	60.374	65.351	43.89	69.495	58.55	78.12	59.359	76.143	45.031	71.466	68.71	54.2	58	62.084	70.95	73.003	55.562	38.535	60.515	71.174	56.401	80.548	44.739	59.172	48.238	69.65	45.726	72.206	46.827	67.157	56.426	70.53	47.483	68.367	61.402	85.473	68.328	53.683	59.823	72.233	64.005	70.484	58.664	51.329	60.264	67.794	67.431	65.308	46.699
739.47	60.263	65.232	43.913	69.477	58.514	78.039	59.252	75.975	44.985	71.448	68.692	54.177	58.041	62.038	70.924	72.987	55.463	38.478	60.52	71.127	56.422	80.45	44.67	59.128	48.251	69.647	45.726	72.177	46.778	67.135	56.438	70.525	47.505	68.329	61.412	85.44	68.296	53.655	59.841	72.215	63.942	70.508	58.649	51.31	60.262	67.753	67.385	65.22	46.698
739.87	60.284	65.198	43.918	69.599	58.526	78.019	59.328	76.024	45.017	71.405	68.66	54.204	58.037	61.917	70.933	72.96	55.423	38.578	60.588	71.009	56.403	80.465	44.702	59.126	48.263	69.682	45.748	72.162	46.781	67.3	56.344	70.477	47.522	68.298	61.389	85.426	68.242	53.552	59.78	72.128	63.992	70.537	58.61	51.317	60.29	67.717	67.322	65.22	46.599
740.28	60.223	65.133	43.865	69.533	58.446	77.912	59.294	75.899	44.986	71.417	68.596	54.194	57.963	61.868	70.768	72.847	55.351	38.492	60.55	70.958	56.377	80.552	44.628	59.043	48.166	69.563	45.696	72.018	46.658	67.273	56.324	70.477	47.548	68.316	61.464	85.416	68.282	53.548	59.841	72.131	64.047	70.525	58.617	51.353	60.319	67.761	67.28	65.329	46.606
740.68	60.385	65.178	43.986	69.59	58.528	77.942	59.43	75.985	44.982	71.42	68.707	54.3	58.101	62	70.867	72.91	55.53	38.549	60.565	71.049	56.444	80.63	44.616	59.126	48.263	69.737	45.762	72.151	46.649	67.23	56.35	70.543	47.617	68.338	61.464	85.486	68.31	53.544	59.936	72.166	64.086	70.532	58.62	51.411	60.341	67.704	67.312	65.319	46.681
741.08	60.467	65.297	44.07	69.625	58.665	78.03	59.535	76.166	45.074	71.567	68.828	54.315	58.253	62.229	70.953	73.004	55.711	38.585	60.663	71.221	56.374	80.758	44.688	59.145	48.336	69.853	45.846	72.151	46.713	67.357	56.317	70.493	47.618	68.287	61.425	85.466	68.18	53.516	59.957	72.063	64.103	70.54	58.626	51.451	60.33	67.608	67.229	65.317	46.641
741.49	60.478	65.341	44.178	69.769	58.655	78.191	59.593	76.242	45.11	71.589	68.947	54.294	58.285	62.222	71.193	73.22	55.723	38.658	60.773	71.218	56.472	80.896	44.726	59.279	48.297	70.014	45.82	72.164	46.714	67.346	56.243	70.422	47.585	68.219	61.375	85.473	68.195	53.492	59.938	72.069	64.028	70.526	58.624	51.446	60.315	67.581	67.204	65.278	46.615
741.89	60.397	65.303	44.166	69.813	58.726	78.175	59.742	76.38	45.159	71.639	69.044	54.344	58.394	62.288	71.192	73.266	55.759	38.718	60.835	71.227	56.489	80.95	44.732	59.312	48.343	70.054	45.822	72.218	46.733	67.341	56.256	70.512	47.598	68.212	61.423	85.443	68.23	53.491	59.996	72.099	64.093	70.478	58.718	51.495	60.331	67.616	67.195	65.268	46.614
742.29	60.421	65.344	44.25	69.766	58.833	78.246	59.913	76.481	45.247	71.712	69.027	54.305	58.44	62.311	71.229	73.267	55.822	38.738	60.85	71.315	56.589	81.038	44.816	59.221	48.353	70.087	45.859	72.233	46.831	67.445	56.216	70.43	47.558	68.182	61.414	85.452	68.236	53.509	59.936	72.044	64.084	70.394	58.612	51.478	60.259	67.578	67.161	65.223	46.621
742.7	60.338	65.273	44.331	69.627	58.739	78.255	59.856	76.457	45.245	71.632	68.978	54.263	58.373	62.302	71.23	73.174	55.82	38.645	60.827	71.297	56.518	81.002	44.712	59.101	48.309	69.934	45.793	72.032	46.728	67.348	56.208	70.392	47.533	68.129	61.375	85.405	68.123	53.478	59.88	71.975	64.008	70.375	58.557	51.483	60.222	67.522	67.089	65.233	46.563
743.1	60.42	65.333	44.371	69.701	58.881	78.234	59.899	76.515	45.228	71.656	68.96	54.349	58.512	62.39	71.353	73.2	55.845	38.607	60.874	71.307	56.624	81.099	44.649	59.069	48.368	69.937	45.812	72.045	46.746	67.35	56.24	70.448	47.576	68.199	61.395	85.458	68.159	53.502	59.946	71.939	64.029	70.43	58.636	51.498	60.32	67.509	67.11	65.163	46.596
743.5	60.433	65.187	44.338	69.778	58.883	78.203	60.024	76.499	45.234	71.607	68.945	54.267	58.521	62.353	71.362	73.094	55.873	38.549	60.865	71.323	56.568	81.058	44.634	59.038	48.383	69.838	45.856	72.019	46.771	67.414	56.236	70.426	47.578	68.199	61.464	85.496	68.16	53.515	60.003	71.91	64.037	70.479	58.643	51.568	60.368	67.51	67.164	65.235	46.655
743.91	60.474	65.174	44.433	69.746	58.864	78.313	60.136	76.477	45.194	71.648	69.033	54.284	58.52	62.327	71.418	73.05	55.913	38.498	60.778	71.306	56.669	81.108	44.642	58.999	48.382	69.823	45.95	72.045	46.726	67.404	56.208	70.415	47.568	68.179	61.536	85.475	68.13	53.446	59.957	71.971	64.061	70.478	58.707	51.56	60.375	67.576	67.112	65.153	46.608
744.31	60.532	65.13	44.408	69.597	58.888	78.176	60.224	76.531	45.194	71.681	69.078	54.357	58.544	62.426	71.398	73.053	55.955	38.467	60.745	71.282	56.767	81.205	44.621	58.904	48.378	69.825	45.915	72.113	46.632	67.367	56.196	70.345	47.56	68.098	61.568	85.465	67.981	53.334	59.877	71.898	64.042	70.495	58.639	51.517	60.298	67.54	67.079	65.157	46.591
744.71	60.567	65.122	44.396	69.437	58.857	78.221	60.222	76.54	45.253	71.682	69.128	54.414	58.564	62.452	71.411	73.095	55.957	38.513	60.759	71.261	56.793	81.145	44.602	58.902	48.323	69.844	45.903	72.102	46.688	67.453	56.217	70.38	47.56	68.115	61.616	85.566	68.058	53.402	59.947	71.889	64.03	70.465	58.711	51.565	60.292	67.565	67.07	65.166	46.586
745.12	60.514	65.025	44.43	69.305	58.805	78.12	60.132	76.449	45.156	71.625	69.113	54.357	58.431	62.555	71.298	73.076	55.893	38.408	60.664	71.221	56.727	80.928	44.543	58.78	48.34	69.799	45.838	72.021	46.499	67.393	56.309	70.44	47.572	68.245	61.658	85.551	68.056	53.387	59.976	71.87	64.098	70.505	58.686	51.601	60.308	67.664	67.056	65.159	46.626
745.52	60.527	65.045	44.459	69.329	58.804	78.126	60.17	76.496	45.189	71.635	69.256	54.448	58.511	62.543	71.337	73.113	55.916	38.429	60.654	71.243	56.822	80.976	44.533	58.81	48.397	69.811	45.823	72.007	46.511	67.456	56.357	70.401	47.548	68.228	61.601	85.629	68.061	53.363	60.007	71.908	64.159	70.531	58.669	51.635	60.286	67.739	67.094	65.197	46.701
745.92	60.551	64.988	44.425	69.234	58.824	78.109	60.15	76.411	45.215	71.662	69.249	54.426	58.471	62.565	71.326	73.097	55.902	38.439	60.571	71.179	56.824	81.045	44.454	58.768	48.344	69.77	45.779	71.996	46.492	67.444	56.319	70.31	47.563	68.235	61.6	85.655	68.028	53.348	59.985	71.823	64.147	70.525	58.638	51.624	60.314	67.657	67.115	65.198	46.625
746.33	60.471	64.886	44.355	69.131	58.797	78.065	60.058	76.333	45.18	71.602	69.202	54.342	58.356	62.385	71.208	73.044	55.774	38.365	60.503	71.129	56.759	80.932	44.463	58.693	48.334	69.674	45.74	71.906	46.445	67.39	56.157	70.193	47.538	68.178	61.54	85.554	67.88	53.306	59.918	71.752	64.111	70.458	58.478	51.561	60.258	67.588	66.95	65.151	46.514
746.73	60.405	64.977	44.392	69.157	58.856	78.179	60.062	76.436	45.193	71.667	69.238	54.35	58.42	62.366	71.283	73.089	55.791	38.373	60.508	71.207	56.822	81.036	44.542	58.678	48.356	69.692	45.763	71.938	46.513	67.413	56.15	70.122	47.579	68.215	61.59	85.632	67.93	53.342	59.941	71.739	64.175	70.558	58.521	51.548	60.209	67.707	66.958	65.142	46.532
747.13	60.485	65.025	44.384	69.223	58.937	78.224	60.141	76.538	45.151	71.709	69.285	54.405	58.388	62.395	71.311	73.08	55.898	38.353	60.485	71.273	56.826	81.116	44.576	58.767	48.41	69.667	45.926	71.892	46.539	67.437	56.241	70.178	47.567	68.297	61.689	85.731	68.039	53.43	59.982	71.801	64.293	70.574	58.621	51.609	60.314	67.819	67.067	65.209	46.603
747.53	60.569	65.077	44.39	69.161	58.93	78.326	60.113	76.595	45.125	71.706	69.296	54.368	58.441	62.498	71.288	73.115	55.918	38.353	60.468	71.372	56.807	81.177	44.556	58.815	48.421	69.642	45.976	71.919	46.522	67.35	56.303	70.26	47.562	68.354	61.729	85.842	68.096	53.459	60.028	71.84	64.304	70.557	58.713	51.655	60.283	67.914	67.18	65.186	46.705
747.94	60.525	64.985	44.356	69.136	58.952	78.375	60.114	76.59	45.095	71.618	69.343	54.358	58.532	62.482	71.289	73.126	55.923	38.361	60.472	71.373	56.71	81.103	44.566	58.754	48.353	69.627	45.967	71.948	46.48	67.352	56.283	70.188	47.543	68.322	61.676	85.781	68.04	53.458	59.961	71.805	64.276	70.513	58.714	51.573	60.243	67.859	67.219	65.072	46.68
748.34	60.438	65.036	44.357	69.214	59.035	78.373	60.145	76.694	45.112	71.701	69.381	54.277	58.587	62.471	71.268	73.17	55.891	38.452	60.403	71.428	56.773	81.097	44.591	58.792	48.337	69.573	45.968	72.052	46.424	67.464	56.277	70.228	47.533	68.403	61.725	85.814	68.034	53.418	59.859	71.827	64.303	70.547	58.706	51.559	60.243	67.945	67.295	65.137	46.695
748.74	60.317	64.935	44.335	69.169	58.975	78.302	60.021	76.549	45.038	71.6	69.327	54.23	58.541	62.4	71.155	73.153	55.812	38.509	60.309	71.315	56.744	81.012	44.493	58.741	48.21	69.468	45.905	72.012	46.392	67.331	56.319	70.261	47.518	68.499	61.736	85.814	68.186	53.437	59.863	71.944	64.363	70.552	58.752	51.546	60.274	68.05	67.418	65.171	46.725
749.14	60.335	64.893	44.302	69.071	58.896	78.16	59.988	76.423	44.994	71.525	69.31	54.241	58.555	62.361	71.05	72.995	55.762	38.478	60.236	71.323	56.657	80.951	44.445	58.563	48.194	69.402	45.944	71.991	46.359	67.404	56.325	70.281	47.53	68.549	61.799	85.823	68.18	53.383	59.873	71.909	64.396	70.57	58.803	51.556	60.283	68.045	67.442	65.185	46.75
749.55	60.347	64.935	44.363	69.056	58.93	78.184	60.015	76.375	45.002	71.561	69.311	54.367	58.516	62.316	71.134	72.948	55.77	38.507	60.189	71.359	56.74	80.988	44.468	58.58	48.239	69.383	45.947	72.073	46.425	67.372	56.364	70.272	47.525	68.652	61.835	85.876	68.259	53.435	59.924	71.994	64.454	70.694	58.8	51.581	60.321	68.089	67.552	65.277	46.844
749.95	60.344	64.862	44.304	69.102	58.91	78.248	59.939	76.338	45.027	71.523	69.253	54.353	58.551	62.297	71.148	72.982	55.768	38.537	60.189	71.373	56.806	81.032	44.482	58.618	48.215	69.321	45.935	72.098	46.324	67.312	56.337	70.241	47.51	68.693	61.818	85.814	68.22	53.397	59.993	72.028	64.444	70.695	58.904	51.613	60.313	68.105	67.581	65.265	46.813
750.35	60.39	64.93	44.304	69.143	58.878	78.276	59.996	76.254	45.036	71.49	69.299	54.384	58.599	62.309	71.135	73.017	55.816	38.521	60.224	71.351	56.877	80.988	44.515	58.652	48.254	69.435	45.973	72.247	46.396	67.362	56.29	70.237	47.496	68.69	61.848	85.817	68.25	53.362	60.061	72.047	64.411	70.664	58.926	51.588	60.237	68.112	67.523	65.195	46.835
750.75	60.37	64.933	44.328	69.125	58.865	78.354	59.968	76.35	45.006	71.462	69.303	54.357	58.502	62.241	71.168	73.018	55.861	38.548	60.231	71.327	56.908	80.972	44.558	58.721	48.324	69.489	45.96	72.374	46.458	67.348	56.258	70.268	47.487	68.697	61.841	85.792	68.236	53.319	60.009	71.999	64.382	70.632	58.874	51.582	60.214	68.132	67.515	65.213	46.782
[truncated: 41 more columns]
